# Supplementary material for: Identification and Expression Analysis of Candidate Genes Associated with Defense Responses to Phytophthora capsici in Pepper Line “PI 201234”
Source: Int J Mol Sci. 2015 May 18;16(5):11417–38. doi: 10.3390/ijms160511417 (PMC4463708; doi:10.3390/ijms160511417)
Supplement: Supplementary file 1 [file ijms-16-11417-s001.xlsx]

## Sheet: Table S1
Table S1. Summary and functional annotation of identified DEGs. (log2(fold change) ≥ 1 or ≤ −1 and p-value ≤ 0.05).
Name	Position	Reference	Expression(FPKM)		Library A vs. Library CK				Kegg						Interpro	GO
			Library A#	Library CK#	log2(fold_change)	p-Value	Q-Value	Mark	Kegg Best_hits	Kegg Identity	Kegg Score	Kegg E-value	Kegg Annotation	Kegg Pathway		GO Molecular Function	GO Cellular Component	GO Biological Process
XLOC_000016	0[+]145620685-145621013	-	63.1037	13.1058	2.26752	0.00505	0.671798	Up	ath:AT4G30110	75	132	6e-30	HMA2; HMA2; cadmium-transporting ATPase; K01534 Cd2+/Zn2+-exporting ATPase [EC:3.6.3.3 3.6.3.5]	|Unclassified; Metabolism; Energy metabolism|	|%IPR001757:Cation-transporting P-type ATPase :%IPR008250:P-type ATPase, A domain|	|GO:0000166:nucleotide binding|GO:0019829:cation-transporting ATPase activity|GO:0046872:metal ion binding|	|GO:0016021:integral to membrane|	|GO:0006812:cation transport|
XLOC_000058	0[+]189628493-189629071	-	1.6368	0	inf	0.0018	0.466075	Up	vvi:100258011	68	177	2e-43	similar to vacuolar protein sorting 13C protein-like
XLOC_000076	0[+]202310611-202312653	Capana00g000130,	25.0839	9.91412	1.33921	0.02975	0.996326	Up	rcu:RCOM_1597120	91	303	3e-81	Auxin response factor, putative; K14486 auxin response factor	|Environmental Information Processing; Signal Transduction; Plant hormone signal transduction [PATH:ko04075-Map:ko04075];|	|%IPR015300:DNA-binding pseudobarrel domain :|
XLOC_000114	0[+]227674546-227675349	Capana00g000321,	162.884	411.102	-1.33565	0.00535	0.671798	Down	vvi:100249664	36	150	1e-34	hypothetical protein LOC100249664		|%IPR000182:GNAT domain :%IPR016181:Acyl-CoA N-acyltransferase|	|GO:0008080:N-acetyltransferase activity|
XLOC_000137	0[+]254465480-254470192	Capana00g000483,	4.06356	1.09818	1.88763	0.00235	0.555365	Up	vvi:100243147	52	877	0	hypothetical protein LOC100243147		|%IPR001965:Zinc finger, PHD-type :%IPR004022:DDT domain|	|GO:0005515:protein binding|GO:0008270:zinc ion binding|
XLOC_000183	0[+]280031938-280034117	Capana00g000643,	0.462919	4.95022	-3.41866	0.0028	0.608581	Down	pop:POPTR_751129	41	333	2e-89	hypothetical protein		|%IPR011598:Myc-type, basic helix-loop-helix (bHLH) domain :%IPR025610:Transcription factor MYC/MYB N-terminal|	|GO:0046983:protein dimerization activity|
XLOC_000207	0[+]296600816-296602396	Capana00g000769,	8.15642	3.55183	1.19937	0.0384	0.996326	Up	rcu:RCOM_1577300	58	452	1e-125	serine/threonine protein kinase, putative (EC:2.7.11.1)		|%IPR000719:Protein kinase domain :%IPR002290:Serine/threonine- / dual specificity protein kinase, catalytic domain|	|GO:0004672:protein kinase activity|GO:0004674:protein serine/threonine kinase activity|GO:0004713:protein tyrosine kinase activity|GO:0005524:ATP binding|GO:0016772:transferase activity, transferring phosphorus-containing groups|		|GO:0006468:protein phosphorylation|
XLOC_000232	0[+]308441490-308448440	-	9.32942	2.61322	1.83596	0.01495	0.930531	Up	pop:POPTR_815822	59	162	2e-43	hypothetical protein		|%IPR000719:Protein kinase domain :%IPR002659:Glycosyl transferase, family 31|	|GO:0004672:protein kinase activity|GO:0005524:ATP binding|GO:0008378:galactosyltransferase activity|GO:0016772:transferase activity, transferring phosphorus-containing groups|	|GO:0016020:membrane|	|GO:0006468:protein phosphorylation|GO:0006486:protein glycosylation|
XLOC_000250	0[+]313938878-313949192	Capana00g000929,	18.3135	7.51833	1.28442	0.033	0.996326	Up	rcu:RCOM_1586470	64	714	0	protein binding protein, putative; K12821 pre-mRNA-processing factor 40	|Genetic Information Processing; Transcription; Spliceosome [BR:ko03041];|Genetic Information Processing; Transcription; Spliceosome [PATH:ko03040-Map:ko03040];|	|%IPR001202:WW domain :%IPR002713:FF domain|	|GO:0005515:protein binding|
XLOC_000261	0[+]319915986-319922469	Capana00g000988,	6.01717	2.59703	1.21222	0.03265	0.996326	Up	vvi:100265765	64	985	0	hypothetical protein LOC100265765; K00888 phosphatidylinositol 4-kinase [EC:2.7.1.67]	|Environmental Information Processing; Signal Transduction; Phosphatidylinositol signaling system [PATH:ko04070-Map:ko04070];|Metabolism; Carbohydrate Metabolism; Inositol phosphate metabolism [PATH:ko00562-Map:ko00562];|	|%IPR015433:Phosphatidylinositol Kinase :|			|GO:0046854:phosphatidylinositol phosphorylation|GO:0048015:phosphatidylinositol-mediated signaling|
XLOC_000286	0[+]349626888-349628575	Capana00g001129,	14.869	49.9764	-1.74894	0.0012	0.388396	Down	pop:POPTR_777213	80	474	1e-132	hypothetical protein; K00430 peroxidase [EC:1.11.1.7]	|Metabolism; Amino Acid Metabolism; Phenylalanine metabolism [PATH:ko00360-Map:ko00360];|Metabolism; Biosynthesis of Other Secondary Metabolites; Phenylpropanoid biosynthesis [PATH:ko00940-Map:ko00940];|Metabolism; Energy Metabolism; Methane metabolism [PATH:ko00680-Map:ko00680];|	|%IPR000823:Plant peroxidase :%IPR002016:Haem peroxidase, plant/fungal/bacterial|	|GO:0004601:peroxidase activity|GO:0020037:heme binding|		|GO:0006979:response to oxidative stress|GO:0055114:oxidation-reduction process|
XLOC_000338	0[+]399575502-399578685	Capana00g001483,	112.26	51.8975	1.11311	0.0237	0.996326	Up	vvi:100244817	50	315	5e-84	hypothetical protein LOC100244817		|%IPR006121:Heavy metal-associated domain, HMA :|	|GO:0046872:metal ion binding|		|GO:0030001:metal ion transport|
XLOC_000341	0[+]400327289-400328025	Capana00g001496,	32.1936	6.25071	2.36468	0.00035	0.254194	Up	vvi:100241480	42	125	2e-27	hypothetical protein LOC100241480		|%IPR005630:Terpene synthase, metal-binding domain :%IPR008949:Terpenoid synthase|	|GO:0000287:magnesium ion binding|GO:0010333:terpene synthase activity|GO:0016829:lyase activity|
XLOC_000342	0[+]400335355-400338069	Capana00g001497,	1.40082	3.56842	-1.34901	0.03195	0.996326	Down	pop:POPTR_575250	48	543	1e-152	hypothetical protein		|%IPR001906:Terpene synthase, N-terminal domain :%IPR005630:Terpene synthase, metal-binding domain|	|GO:0000287:magnesium ion binding|GO:0010333:terpene synthase activity|GO:0016829:lyase activity|		|GO:0008152:metabolic process|
XLOC_000395	0[+]421591074-421604489	-	2.22525	6.48401	-1.54292	0.04295	0.996326	Down
XLOC_000437	0[+]438948692-438970481	Capana00g001897,	0.552799	0	inf	0.0017	0.466075	Up	rcu:RCOM_0272150	28	119	3e-25	hypothetical protein; K11138 telomere-associated protein RIF1	|Genetic Information Processing; Replication and Repair; DNA replication proteins [BR:ko03032];|
XLOC_000494	0[+]458162469-458199974	Capana00g002207,Capana00g002208,	1.85012	0.785244	1.23641	0.03425	0.996326	Up	vvi:100248159	52	1705	0	hypothetical protein LOC100248159		|%IPR001487:Bromodomain :%IPR001680:WD40 repeat|	|GO:0005515:protein binding|
XLOC_000495	0[+]458206869-458218809	Capana00g002209,Capana00g002210,	3.02505	1.28677	1.23321	0.0247	0.996326	Up	vvi:100255608	67	1712	0	hypothetical protein LOC100255608; K08737 DNA mismatch repair protein MSH6	|Genetic Information Processing; Replication and Repair; DNA repair and recombination proteins [BR:ko03400];|Genetic Information Processing; Replication and Repair; Mismatch repair [PATH:ko03430-Map:ko03430];|Human Diseases; Cancers; Colorectal cancer [PATH:ko05210-Map:ko05210];|Human Diseases; Cancers; Pathways in cancer [PATH:ko05200-Map:ko05200];|	|%IPR000432:DNA mismatch repair protein MutS, C-terminal :%IPR002999:Tudor domain|	|GO:0005524:ATP binding|GO:0030983:mismatched DNA binding|		|GO:0006298:mismatch repair|
XLOC_000507	0[+]461679278-461681788	-	6.09027	12.9821	-1.09195	0.0378	0.996326	Down
XLOC_000556	0[+]478738372-478747736	Capana00g002490,	9.59587	4.03669	1.24924	0.01465	0.924223	Up	pop:POPTR_766135	59	2004	0	hypothetical protein		|%IPR002423:Chaperonin Cpn60/TCP-1 :%IPR002498:Phosphatidylinositol-4-phosphate 5-kinase, core|	|GO:0005524:ATP binding|GO:0016307:phosphatidylinositol phosphate kinase activity|		|GO:0044267:cellular protein metabolic process|GO:0046488:phosphatidylinositol metabolic process|
XLOC_000557	0[+]478786180-478787963	Capana00g002492,	7.15773	16.8887	-1.23848	0.0336	0.996326	Down	vvi:100256093	60	255	2e-66	hypothetical protein LOC100256093		|%IPR025322:Protein of unknown function DUF4228, plant :|
XLOC_000563	0[+]480732812-480734820	Capana00g002536,	1.10487	4.01555	-1.86172	0.01465	0.924223	Down	vvi:100267921	63	325	3e-87	hypothetical protein LOC100267921		|%IPR004316:SWEET sugar transporter :|		|GO:0016021:integral to membrane|
XLOC_000622	0[+]497548937-497551218	-	4.13919	12.8192	-1.63089	0.00755	0.744425	Down
XLOC_000642	0[+]501875272-501906703	Capana00g002838,Capana00g002839,Capana00g002840,Capana00g002842,	9.49438	4.59624	1.04662	0.0385	0.996326	Up	vvi:100266900	57	1875	0	hypothetical protein LOC100266900		|%IPR000722:RNA polymerase, alpha subunit :%IPR006592:RNA polymerase, N-terminal|	|GO:0003677:DNA binding|GO:0003899:DNA-directed RNA polymerase activity|GO:0005507:copper ion binding|GO:0048038:quinone binding|		|GO:0006351:transcription, DNA-dependent|GO:0009308:amine metabolic process|
XLOC_000661	0[+]503887315-503891075	Capana00g002902,Capana00g002903,	0.745621	0.256717	1.53826	0.04465	0.996326	Up	rcu:RCOM_1436140	64	691	0	pentatricopeptide repeat-containing protein, putative		|%IPR002885:Pentatricopeptide repeat :|
XLOC_000708	0[+]522737626-522740294	Capana00g003080,	0.997353	2.55182	-1.35535	0.04725	0.996326	Down	vvi:100243330	58	558	1e-157	hypothetical protein LOC100243330; K13691 pathogen-inducible salicylic acid glucosyltransferase [EC:2.4.1.-]	|Metabolism; Glycan Biosynthesis and Metabolism; Glycosyltransferases [BR:ko01003];|	|%IPR002213:UDP-glucuronosyl/UDP-glucosyltransferase :|	|GO:0016758:transferase activity, transferring hexosyl groups|		|GO:0008152:metabolic process|
XLOC_000731	0[+]529452917-529454263	Capana00g003154,	4.84546	15.1478	-1.64441	0.00755	0.744425	Down	pop:POPTR_665990	45	173	2e-41	MYB063; hypothetical protein; K09422 myb proto-oncogene protein, plant	|Genetic Information Processing; Transcription; Transcription factors [BR:ko03000];|	|%IPR001005:SANT/Myb domain :%IPR009057:Homeodomain-like|	|GO:0003677:DNA binding|GO:0003682:chromatin binding|
XLOC_000754	0[+]538609349-538610999	-	168.477	350.775	-1.05799	0.03155	0.996326	Down	vvi:100260685	55	75.9	9e-12	hypothetical protein LOC100260685		|%IPR004926:Late embryogenesis abundant protein, LEA-5 :|			|GO:0006950:response to stress|
XLOC_000760	0[+]538862867-538874107	Capana00g003278,	0.885872	0.356771	1.3121	0.0499	0.996326	Up	vvi:100257310	42	855	0	hypothetical protein LOC100257310		|%IPR001357:BRCT domain :%IPR001965:Zinc finger, PHD-type|	|GO:0005515:protein binding|GO:0008270:zinc ion binding|
XLOC_000776	0[+]541673562-541674433	-	292.884	593.039	-1.0178	0.0346	0.996326	Down
XLOC_000778	0[+]543914078-543915000	-	2.36505	20.3096	-3.10222	0.02525	0.996326	Down
XLOC_000793	0[+]545019211-545022377	Capana00g003396,	0.902724	0	inf	0.0002	0.186106	Up	vvi:100251367	54	319	2e-85	hypothetical protein LOC100251367; K14497 protein phosphatase 2C [EC:3.1.3.16]	|Environmental Information Processing; Signal Transduction; Plant hormone signal transduction [PATH:ko04075-Map:ko04075];|	|%IPR000222:Protein phosphatase 2C, manganese/magnesium aspartate binding site :%IPR001932:Protein phosphatase 2C (PP2C)-like domain|	|GO:0003824:catalytic activity|GO:0004722:protein serine/threonine phosphatase activity|		|GO:0006470:protein dephosphorylation|
XLOC_000797	0[+]545192513-545194093	Capana00g003410,	24.7629	53.4597	-1.11027	0.03265	0.996326	Down	pop:POPTR_180036	77	148	5e-34	hypothetical protein
XLOC_000799	0[+]545224748-545226696	-	13.7191	43.5215	-1.66554	0.01715	0.967189	Down	rcu:RCOM_1691430	45	310	1e-82	hypothetical protein		|%IPR003657:DNA-binding WRKY :|	|GO:0003700:sequence-specific DNA binding transcription factor activity|GO:0043565:sequence-specific DNA binding|		|GO:0006355:regulation of transcription, DNA-dependent|
XLOC_000803	0[+]545697852-545700040	-	0	4.87757	-inf	0.0005	0.275713	Down
XLOC_000818	0[+]554507394-554507987	Capana00g003517,	8.02908	30.9713	-1.94763	0.00145	0.454491	Down	pop:POPTR_560834	38	86.3	1e-15	hypothetical protein
XLOC_000822	0[+]558062765-558063886	Capana00g003535,	2.44859	7.48204	-1.61148	0.0406	0.996326	Down	rcu:RCOM_1023550	57	185	1e-45	copper transport protein atox1, putative		|%IPR006121:Heavy metal-associated domain, HMA :|	|GO:0046872:metal ion binding|		|GO:0030001:metal ion transport|
XLOC_000855	0[+]574568604-574574728	Capana00g003663,	2.63878	6.80172	-1.36603	0.02325	0.996326	Down	vvi:100263459	59	637	0	hypothetical protein LOC100263459		|%IPR001128:Cytochrome P450 :%IPR002401:Cytochrome P450, E-class, group I|	|GO:0005506:iron ion binding|GO:0009055:electron carrier activity|GO:0016705:oxidoreductase activity, acting on paired donors, with incorporation or reduction of molecular oxygen|GO:0020037:heme binding|		|GO:0055114:oxidation-reduction process|
XLOC_000857	0[+]574701129-574724482	Capana00g003672,Capana00g003673,	1.0176	0.287204	1.82502	0.01265	0.892621	Up	vvi:100267354	72	1982	0	hypothetical protein LOC100267354; K03018 DNA-directed RNA polymerase III subunit RPC1 [EC:2.7.7.6]	|Genetic Information Processing; Transcription; RNA polymerase [PATH:ko03020-Map:ko03020];|Metabolism; Nucleotide Metabolism; Purine metabolism [PATH:ko00230-Map:ko00230];|Metabolism; Nucleotide Metabolism; Pyrimidine metabolism [PATH:ko00240-Map:ko00240];|Organismal Systems; Immune System; Cytosolic DNA-sensing pathway [PATH:ko04623-Map:ko04623];|	|%IPR000722:RNA polymerase, alpha subunit :%IPR006592:RNA polymerase, N-terminal|	|GO:0003677:DNA binding|GO:0003899:DNA-directed RNA polymerase activity|GO:0008270:zinc ion binding|GO:0032549:ribonucleoside binding|	|GO:0005634:nucleus|	|GO:0006351:transcription, DNA-dependent|
XLOC_000879	0[+]580071437-580073078	Capana00g003763,	4.07359	8.90476	-1.12828	0.03995	0.996326	Down	vvi:100247750	26	80.9	2e-13	hypothetical protein LOC100247750
XLOC_000920	0[+]591785675-591815298	Capana00g003924,Capana00g003925,	6.01194	2.63229	1.19151	0.04345	0.996326	Up	vvi:100248770	49	405	1e-111	hypothetical protein LOC100248770
XLOC_001022	0[+]627237067-627238508	Capana00g004268,	1.1402	3.9038	-1.77559	0.01525	0.930531	Down	vvi:100264755	70	285	1e-121	hypothetical protein LOC100264755		|%IPR000823:Plant peroxidase :%IPR002016:Haem peroxidase, plant/fungal/bacterial|	|GO:0004601:peroxidase activity|GO:0020037:heme binding|		|GO:0006979:response to oxidative stress|GO:0055114:oxidation-reduction process|
XLOC_001023	0[+]627242093-627243436	Capana00g004269,	39.4968	17.4441	1.179	0.0252	0.996326	Up	rcu:RCOM_0774930	71	466	1e-129	Lignin-forming anionic peroxidase precursor, putative (EC:1.11.1.7); K00430 peroxidase [EC:1.11.1.7]	|Metabolism; Amino Acid Metabolism; Phenylalanine metabolism [PATH:ko00360-Map:ko00360];|Metabolism; Biosynthesis of Other Secondary Metabolites; Phenylpropanoid biosynthesis [PATH:ko00940-Map:ko00940];|Metabolism; Energy Metabolism; Methane metabolism [PATH:ko00680-Map:ko00680];|	|%IPR000823:Plant peroxidase :%IPR002016:Haem peroxidase, plant/fungal/bacterial|	|GO:0004601:peroxidase activity|GO:0020037:heme binding|		|GO:0006979:response to oxidative stress|GO:0055114:oxidation-reduction process|
XLOC_001043	0[+]635132318-635133124	Capana00g004363,	1.3806	6.00719	-2.1214	0.0102	0.832124	Down	vvi:100265477	50	214	7e-54	CBF3; CBF-like transcription factor		|%IPR001471:AP2/ERF domain :%IPR016177:DNA-binding domain|	|GO:0003677:DNA binding|GO:0003700:sequence-specific DNA binding transcription factor activity|		|GO:0006355:regulation of transcription, DNA-dependent|
XLOC_001063	0[+]646547483-646549875	Capana00g004469,	255.373	690.088	-1.43418	0.00385	0.639234	Down	vvi:100246012	66	240	9e-62	hypothetical protein LOC100246012
XLOC_001101	0[+]662743658-662744551	-	12.0909	68.5683	-2.50362	0.00015	0.148885	Down
XLOC_001124	0[+]666125395-666125809	Capana00g004697,	17.8044	40.2103	-1.17533	0.04475	0.996326	Down
XLOC_001134	0[+]666650804-666666083	Capana00g004721,	4.66576	2.11612	1.14069	0.0295	0.996326	Up	vvi:100265641	41	1154	0	hypothetical protein LOC100265641
XLOC_001139	0[+]667060974-667062264	Capana00g004741,	2.13043	6.01108	-1.49648	0.0251	0.996326	Down	vvi:100245033	43	157	9e-37	hypothetical protein LOC100245033
XLOC_001144	0[+]667824003-667826220	-	49.8452	104.082	-1.06219	0.0469	0.996326	Down
XLOC_001150	0[+]668938714-668944985	Capana00g004797,	1.60399	0.282782	2.5039	0.03885	0.996326	Up	vvi:100262192	55	355	6e-96	hypothetical protein LOC100262192		|%IPR000823:Plant peroxidase :%IPR002016:Haem peroxidase, plant/fungal/bacterial|	|GO:0004601:peroxidase activity|GO:0020037:heme binding|		|GO:0006979:response to oxidative stress|GO:0055114:oxidation-reduction process|
XLOC_001158	0[+]670032882-670036654	Capana00g004831,	1.73771	10.5719	-2.60497	0.00555	0.671798	Down	zma:100273402	64	161	3e-38	hypothetical protein LOC100273402
XLOC_001169	0[+]671179127-671205853	-	89.5938	244.774	-1.44998	0.0208	0.996326	Down
XLOC_001271	0[-]171957326-171957718	-	35.1186	91.8484	-1.38702	0.02995	0.996326	Down
XLOC_001279	0[-]182962842-182963794	-	33.6093	10.7642	1.64261	0.02125	0.996326	Up
XLOC_001286	0[-]191897321-191898422	-	101.228	30.3861	1.73612	0.0072	0.739361	Up
XLOC_001308	0[-]202503754-202504355	Capana00g000134,	19.0864	7.20812	1.40485	0.0295	0.996326	Up	vvi:100267580	63	195	8e-49	hypothetical protein LOC100267580; K14557 U3 small nucleolar RNA-associated protein 6	|Genetic Information Processing; Translation; Ribosome Biogenesis [BR:ko03009];|Genetic Information Processing; Translation; Ribosome biogenesis in eukaryotes [PATH:ko03008-Map:ko03008];|
XLOC_001318	0[-]209919273-209920720	Capana00g000196,	1.17927	3.13192	-1.40915	0.0402	0.996326	Down	vvi:100267413	63	420	1e-115	hypothetical protein LOC100267413		|%IPR000490:Glycoside hydrolase, family 17 :%IPR013781:Glycoside hydrolase, catalytic domain|	|GO:0003824:catalytic activity|GO:0004553:hydrolase activity, hydrolyzing O-glycosyl compounds|		|GO:0005975:carbohydrate metabolic process|
XLOC_001351	0[-]230835091-230839833	Capana00g000348,	5.60256	1.91757	1.5468	0.0332	0.996326	Up	vvi:100264144	62	326	1e-87	hypothetical protein LOC100264144		|%IPR011989:Armadillo-like helical :%IPR016024:Armadillo-type fold|	|GO:0005488:binding|
XLOC_001381	0[-]256639499-256640544	Capana00g000498,	7.87887	2.95948	1.41264	0.02425	0.996326	Up	vvi:100259589	58	359	2e-97	hypothetical protein LOC100259589
XLOC_001394	0[-]265920805-265921990	Capana00g000557,	1.1906	4.61996	-1.9562	0.0221	0.996326	Down	vvi:100254717	62	96.3	1e-20	hypothetical protein LOC100254717
XLOC_001425	0[-]287129807-287132035	Capana00g000688,	3.74751	20.4855	-2.4506	5e-05	0.0875794	Down	vvi:100256784	83	556	1e-156	hypothetical protein LOC100256784; K05933 aminocyclopropanecarboxylate oxidase [EC:1.14.17.4]	|Metabolism; Amino Acid Metabolism; Cysteine and methionine metabolism [PATH:ko00270-Map:ko00270];|	|%IPR005123:Oxoglutarate/iron-dependent dioxygenase :%IPR026992:Non-haem dioxygenase N-terminal domain|	|GO:0016491:oxidoreductase activity|GO:0016706:oxidoreductase activity, acting on paired donors, with incorporation or reduction of molecular oxygen, 2-oxoglutarate as one donor, and incorporation of one atom each of oxygen into both donors|		|GO:0055114:oxidation-reduction process|
XLOC_001459	0[-]312456583-312457681	Capana00g000909,	82.0752	184.969	-1.17226	0.0167	0.952636	Down	vvi:100258567	37	165	5e-39	hypothetical protein
XLOC_001460	0[-]312457854-312458788	Capana00g000910,	56.2064	135.671	-1.27131	0.01015	0.832124	Down	vvi:100258567	36	165	5e-39	hypothetical protein
XLOC_001506	0[-]356145914-356155154	Capana00g001167,	3.54421	0.825908	2.10141	0.0149	0.930531	Up	vvi:100254600	66	194	7e-48	hypothetical protein LOC100254600
XLOC_001536	0[-]382464163-382466047	Capana00g001336,	10.1769	4.57379	1.15384	0.0352	0.996326	Up	pop:POPTR_804493	75	707	0	GRAS33; GRAS family transcription factor		|%IPR005202:Transcription factor GRAS :|
XLOC_001572	0[-]400230444-400233124	Capana00g001493,	2.47429	6.73631	-1.44494	0.02745	0.996326	Down	pop:POPTR_720244	74	320	7e-86	hypothetical protein; K08967 1,2-dihydroxy-3-keto-5-methylthiopentene dioxygenase [EC:1.13.11.53 1.13.11.54]	|Metabolism; Amino Acid Metabolism; Cysteine and methionine metabolism [PATH:ko00270-Map:ko00270];|	|%IPR004313:Acireductone dioxygenase ARD family :%IPR011051:RmlC-like cupin domain|	|GO:0010309:acireductone dioxygenase [iron(II)-requiring] activity|GO:0016491:oxidoreductase activity|		|GO:0019509:L-methionine salvage from methylthioadenosine|GO:0055114:oxidation-reduction process|
XLOC_001586	0[-]404095151-404103064	Capana00g001547,	14.9547	5.91165	1.33896	0.0121	0.891836	Up	vvi:100264871	68	800	0	hypothetical protein LOC100264871		|%IPR007967:Protein of unknown function DUF727 :%IPR023231:GSKIP/TIF31 domain|
XLOC_001619	0[-]424427695-424429356	Capana00g001730,	9.3343	20.8291	-1.15798	0.0337	0.996326	Down	pop:POPTR_555238	64	406	1e-111	hypothetical protein
XLOC_001631	0[-]427813379-427820053	Capana00g001769,	1.99573	0.381435	2.38741	0.00115	0.380484	Up	vvi:100258011	64	1202	0	similar to vacuolar protein sorting 13C protein-like
XLOC_001645	0[-]435410064-435418552	Capana00g001861,	29.4736	60.6009	-1.03991	0.04165	0.996326	Down	rcu:RCOM_1353440	65	355	3e-96	carbonic anhydrase, putative (EC:4.2.1.1); K01674 carbonic anhydrase [EC:4.2.1.1]	|Metabolism; Energy Metabolism; Nitrogen metabolism [PATH:ko00910-Map:ko00910];|	|%IPR001148:Alpha carbonic anhydrase :%IPR018338:Carbonic anhydrase, alpha-class, conserved site|	|GO:0004089:carbonate dehydratase activity|GO:0008270:zinc ion binding|		|GO:0006730:one-carbon metabolic process|
XLOC_001659	0[-]439403856-439416786	Capana00g001901,	9.08166	3.45146	1.39575	0.00525	0.671798	Up	rcu:RCOM_1777580	75	1952	0	myosin XI, putative		|%IPR000048:IQ motif, EF-hand binding site :%IPR001609:Myosin head, motor domain|	|GO:0003774:motor activity|GO:0005515:protein binding|GO:0005524:ATP binding|	|GO:0016459:myosin complex|
XLOC_001674	0[-]444566106-444570625	Capana00g001985,	0.981399	2.81294	-1.51917	0.03435	0.996326	Down	rcu:RCOM_0451760	62	234	1e-103	Hsp70-binding protein, putative; K09562 hsp70-interacting protein	|Genetic Information Processing; Folding, Sorting and Degradation; Chaperones and folding catalysts [BR:ko03110];|Genetic Information Processing; Folding, Sorting and Degradation; Protein processing in endoplasmic reticulum [PATH:ko04141-Map:ko04141];|
XLOC_001675	0[-]446199583-446219700	Capana00g001991,	4.98394	2.40546	1.05097	0.04285	0.996326	Up	vvi:100265857	43	1066	0	hypothetical protein LOC100265857		|%IPR000571:Zinc finger, CCCH-type :%IPR001965:Zinc finger, PHD-type|	|GO:0003677:DNA binding|GO:0005515:protein binding|GO:0008270:zinc ion binding|GO:0046872:metal ion binding|	|GO:0005634:nucleus|	|GO:0006352:DNA-dependent transcription, initiation|GO:0016570:histone modification|
XLOC_001684	0[-]449756832-449772637	Capana00g002076,	9.68855	2.35609	2.03989	5e-05	0.0875794	Up	vvi:100255704	73	3957	0	hypothetical protein LOC100255704; K10592 E3 ubiquitin-protein ligase HUWE1 [EC:6.3.2.19]	|Genetic Information Processing; Folding, Sorting and Degradation; Ubiquitin mediated proteolysis [PATH:ko04120-Map:ko04120];|Genetic Information Processing; Folding, Sorting and Degradation; Ubiquitin system [BR:ko04121];|	|%IPR000449:Ubiquitin-associated domain/translation elongation factor EF-Ts, N-terminal :%IPR003903:Ubiquitin interacting motif|	|GO:0005488:binding|GO:0005515:protein binding|
XLOC_001719	0[-]458219168-458222332	Capana00g002211,	40.0134	102.421	-1.35595	0.0084	0.776592	Down	vvi:100260678	60	234	4e-60	hypothetical protein LOC100260678
XLOC_001740	0[-]463655239-463655990	-	5.35032	26.1691	-2.29017	0.01135	0.880127	Down	vvi:100233003	62	159	1e-37	TIP1;1, aquaporin; aquaporin-like		|%IPR000425:Major intrinsic protein :%IPR022357:Major intrinsic protein, conserved site|	|GO:0005215:transporter activity|	|GO:0016020:membrane|	|GO:0006810:transport|
XLOC_001741	0[-]463687726-463689355	-	9.29146	52.9347	-2.51024	5e-05	0.0875794	Down	vvi:100233003	64	322	4e-86	TIP1;1, aquaporin; aquaporin-like		|%IPR000425:Major intrinsic protein :%IPR022357:Major intrinsic protein, conserved site|	|GO:0005215:transporter activity|	|GO:0016020:membrane|	|GO:0006810:transport|
XLOC_001742	0[-]463879993-463888788	-	12.0487	28.3824	-1.23612	0.02825	0.996326	Down	rcu:RCOM_0563820	61	118	4e-25	hypothetical protein		|%IPR015898:G-protein gamma-like domain :|	|GO:0004871:signal transducer activity|	|GO:0005834:heterotrimeric G-protein complex|	|GO:0007186:G-protein coupled receptor signaling pathway|
XLOC_001800	0[-]481680941-481682661	Capana00g002552,	1.36538	3.72217	-1.44684	0.0269	0.996326	Down	vvi:100264861	47	398	1e-109	hypothetical protein LOC100264861		|%IPR001461:Peptidase A1 :%IPR021109:Aspartic peptidase|	|GO:0004190:aspartic-type endopeptidase activity|		|GO:0006508:proteolysis|
XLOC_001828	0[-]496597007-496605490	Capana00g002755,	5.3072	2.34426	1.17882	0.0257	0.996326	Up	vvi:100253251	68	1629	0	hypothetical protein LOC100253251; K10841 DNA excision repair protein ERCC-6	|Genetic Information Processing; Replication and Repair; DNA repair and recombination proteins [BR:ko03400];|Genetic Information Processing; Replication and Repair; Nucleotide excision repair [PATH:ko03420-Map:ko03420];|	|%IPR000330:SNF2-related :%IPR001650:Helicase, C-terminal|	|GO:0003676:nucleic acid binding|GO:0003677:DNA binding|GO:0004386:helicase activity|GO:0005524:ATP binding|
XLOC_001830	0[-]497161315-497163432	Capana00g002760,	2.41885	9.46146	-1.96774	0.00525	0.671798	Down	vvi:100263738	54	171	4e-41	hypothetical protein LOC100263738		|%IPR000916:Bet v I domain :%IPR023393:START-like domain|			|GO:0006952:defense response|GO:0009607:response to biotic stimulus|
XLOC_001833	0[-]497479563-497486100	Capana00g002766,	2.03335	5.25598	-1.3701	0.023	0.996326	Down	vvi:100267947	57	465	1e-129	hypothetical protein LOC100267947		|%IPR006683:Thioesterase superfamily :|
XLOC_001835	0[-]497637083-497638619	-	0.000806751	0.74781	-9.85633	0.0423	0.996326	Down
XLOC_001840	0[-]499377773-499465754	Capana00g002793,Capana00g002802,	80.488	33.3089	1.27287	0.0124	0.891872	Up	rcu:RCOM_0633890	93	520	1e-146	chlorophyll A/B binding protein, putative; K08912 light-harvesting complex II chlorophyll a/b binding protein 1	|Metabolism; Energy Metabolism; Photosynthesis - antenna proteins [PATH:ko00196-Map:ko00196];|Metabolism; Energy Metabolism; Photosynthesis proteins [BR:ko00194];|	|%IPR001344:Chlorophyll A-B binding protein, plant :%IPR022796:Chlorophyll A-B binding protein|		|GO:0016020:membrane|	|GO:0009765:photosynthesis, light harvesting|
XLOC_001894	0[-]509744733-509748518	-	0.761243	2.02934	-1.41458	0.04935	0.996326	Down	rcu:RCOM_0687660	58	81.6	2e-14	laccase, putative (EC:1.10.3.3)
XLOC_001899	0[-]511689586-511690931	-	1.08067	0.000375589	11.4905	0.0396	0.996326	Up	vvi:100258223	34	78.2	1e-12	hypothetical protein LOC100258223
XLOC_001929	0[-]525343822-525345015	Capana00g003132,	23.1371	11.0952	1.06027	0.04705	0.996326	Up	vvi:100262544	54	302	4e-80	hypothetical protein LOC100262544
XLOC_001932	0[-]525755574-525756504	Capana00g003138,	9.03894	22.0748	-1.28818	0.0232	0.996326	Down	vvi:100253886	59	189	3e-46	hypothetical protein LOC100253886; K13448 calcium-binding protein CML	|Organismal Systems; Environmental Adaptation; Plant-pathogen interaction [PATH:ko04626-Map:ko04626];|	|%IPR002048:EF-hand domain :%IPR011992:EF-hand domain pair|	|GO:0005509:calcium ion binding|
XLOC_001935	0[-]526815623-526816279	-	0.000209392	1.55649	-12.8598	0.0236	0.996326	Down	pop:POPTR_566441	56	108	3e-22	hypothetical protein		|%IPR020683:Ankyrin repeat-containing domain :%IPR027001:Caskin/Ankyrin repeat-containing protein|
XLOC_001946	0[-]530769311-530771348	Capana00g003181,	9.37411	3.83648	1.2889	0.02835	0.996326	Up	rcu:RCOM_1486460	45	306	2e-81	BRASSINOSTEROID INSENSITIVE 1-associated receptor kinase 1 precursor, putative (EC:2.7.11.30)		|%IPR024788:Malectin-like carbohydrate-binding domain :|
XLOC_001956	0[-]534971488-534973872	Capana00g003216,Capana00g003217,	5.59281	1.75048	1.67582	0.0053	0.671798	Up	rcu:RCOM_1437440	67	856	0	interferon-induced GTP-binding protein mx, putative		|%IPR000375:Dynamin central domain :%IPR001401:Dynamin, GTPase domain|	|GO:0003924:GTPase activity|GO:0005525:GTP binding|
XLOC_001991	0[-]544729242-544734083	Capana00g003378,	5.68877	14.644	-1.36412	0.01525	0.930531	Down	pop:POPTR_815032	84	616	1e-174	UDP-glucose 4-epimerase (EC:5.1.3.2); K01784 UDP-glucose 4-epimerase [EC:5.1.3.2]	|Metabolism; Carbohydrate Metabolism; Amino sugar and nucleotide sugar metabolism [PATH:ko00520-Map:ko00520];|Metabolism; Carbohydrate Metabolism; Galactose metabolism [PATH:ko00052-Map:ko00052];|	|%IPR001509:NAD-dependent epimerase/dehydratase :%IPR005886:UDP-glucose 4-epimerase GalE|	|GO:0003824:catalytic activity|GO:0003978:UDP-glucose 4-epimerase activity|GO:0016857:racemase and epimerase activity, acting on carbohydrates and derivatives|GO:0050662:coenzyme binding|		|GO:0005975:carbohydrate metabolic process|GO:0006012:galactose metabolic process|GO:0044237:cellular metabolic process|
XLOC_002018	0[-]545722109-545722789	-	36.1381	97.3882	-1.43023	0.00745	0.744425	Down							|%IPR003614:Knottin, scorpion toxin-like :%IPR008176:Gamma thionin|			|GO:0006952:defense response|
XLOC_002057	0[-]571260744-571263582	Capana00g003628,	118.634	290.069	-1.28988	0.0068	0.739361	Down	pop:POPTR_647704	49	157	2e-36	f-box family protein		|%IPR001810:F-box domain :|	|GO:0005515:protein binding|
XLOC_002076	0[-]575078379-575084456	Capana00g003692,	52.5054	24.3134	1.11072	0.0262	0.996326	Up	pop:POPTR_578672	51	385	1e-105	hypothetical protein		|%IPR000620:Drug/metabolite transporter :|		|GO:0016020:membrane|
XLOC_002099	0[-]580834601-580835745	Capana00g003796,	4.94245	1.14862	2.10532	0.009	0.799324	Up	pop:POPTR_591240	51	224	7e-57	hypothetical protein		|%IPR001929:Germin :%IPR006045:Cupin 1|	|GO:0030145:manganese ion binding|GO:0045735:nutrient reservoir activity|
XLOC_002199	0[-]618865020-618866107	Capana00g004199,	6.26852	2.45031	1.35516	0.03155	0.996326	Up	rcu:RCOM_0082580	47	258	5e-67	geranyl geranyl pyrophosphate synthase, putative (EC:2.5.1.29); K13789 geranylgeranyl diphosphate synthase, type II [EC:2.5.1.1 2.5.1.10 2.5.1.29]	|Metabolism; Metabolism of Terpenoids and Polyketides; Prenyltransferases [BR:ko01006];|Metabolism; Metabolism of Terpenoids and Polyketides; Terpenoid backbone biosynthesis [PATH:ko00900-Map:ko00900];|	|%IPR000092:Polyprenyl synthetase :%IPR008949:Terpenoid synthase|			|GO:0008299:isoprenoid biosynthetic process|
XLOC_002228	0[-]628820774-628828362	Capana00g004305,	13.4135	6.36446	1.07558	0.0371	0.996326	Up	vvi:100266163	83	1607	0	hypothetical protein LOC100266163; K02540 minichromosome maintenance protein 2	|Cellular Processes; Cell Growth and Death; Cell cycle - yeast [PATH:ko04111-Map:ko04111];|Cellular Processes; Cell Growth and Death; Cell cycle [PATH:ko04110-Map:ko04110];|Cellular Processes; Cell Growth and Death; Meiosis - yeast [PATH:ko04113-Map:ko04113];|Genetic Information Processing; Replication and Repair; DNA replication [PATH:ko03030-Map:ko03030];|Genetic Information Processing; Replica…	|%IPR001208:Mini-chromosome maintenance, DNA-dependent ATPase :%IPR008045:DNA replication licensing factor Mcm2|	|GO:0003677:DNA binding|GO:0003678:DNA helicase activity|GO:0005524:ATP binding|	|GO:0005634:nucleus|GO:0042555:MCM complex|	|GO:0006260:DNA replication|GO:0006270:DNA replication initiation|
XLOC_002262	0[-]647297582-647300220	Capana00g004478,	101.321	223.962	-1.14432	0.0161	0.941093	Down	vvi:100247682	63	295	4e-78	hypothetical protein LOC100247682		|%IPR004045:Glutathione S-transferase, N-terminal :%IPR004046:Glutathione S-transferase, C-terminal|	|GO:0005515:protein binding|
XLOC_002266	0[-]650911595-650912687	Capana00g004508,	14.1333	36.995	-1.38823	0.0102	0.832124	Down	ath:AT3G50930	43	119	4e-25	BCS1; BCS1 (CYTOCHROME BC1 SYNTHESIS); ATP binding / ATPase/ nucleoside-triphosphatase/ nucleotide binding
XLOC_002292	0[-]656897318-656903193	Capana00g004594,	7.24847	2.94592	1.29896	0.01975	0.996326	Up	vvi:100256753	45	427	1e-117	hypothetical protein LOC100256753		|%IPR007504:H/ACA ribonucleoprotein complex, subunit Gar1/Naf1 :%IPR009000:Translation elongation/initiation factor/Ribosomal, beta-barrel|			|GO:0001522:pseudouridine synthesis|GO:0042254:ribosome biogenesis|
XLOC_002296	0[-]657374013-657375570	Capana00g004598,	116.195	52.6541	1.14193	0.02085	0.996326	Up	vvi:100264557	65	321	4e-86	hypothetical protein LOC100264557		|%IPR004045:Glutathione S-transferase, N-terminal :%IPR010987:Glutathione S-transferase, C-terminal-like|	|GO:0005515:protein binding|
XLOC_002366	0[-]669215852-669217680	Capana00g004811,	6.77228	23.8962	-1.81907	0.00365	0.639234	Down
XLOC_002438	0[-]698772416-698776765	Capana00g005039,	1.84526	0.521159	1.82403	0.04995	0.996326	Up	vvi:100245996	64	432	1e-119	hypothetical protein LOC100245996		|%IPR000823:Plant peroxidase :%IPR002016:Haem peroxidase, plant/fungal/bacterial|	|GO:0004601:peroxidase activity|GO:0020037:heme binding|		|GO:0006979:response to oxidative stress|GO:0055114:oxidation-reduction process|
XLOC_002546	0[.]43272271-43272402	-	2110.71	9472.68	-2.16604	0.0005	0.275713	Down
XLOC_002559	0[.]46374327-46374461	-	2119.31	7406.75	-1.80524	0.00235	0.555365	Down
XLOC_002579	0[.]51935471-51935557	-	11422.8	0	inf	0.0419	0.996326	Up
XLOC_002607	0[.]61556107-61556241	-	105.439	0	inf	0.00555	0.671798	Up
XLOC_002640	0[.]69233860-69234015	-	922.755	4274.61	-2.21177	0.00035	0.254194	Down
XLOC_002679	0[.]79083493-79083660	-	355.049	122.845	1.53118	0.02395	0.996326	Up
XLOC_002702	0[.]82949098-82949399	-	39.6335	14.6488	1.43593	0.03075	0.996326	Up
XLOC_002722	0[.]86056136-86056312	-	458.646	2261.15	-2.3016	0.0001	0.13535	Down
XLOC_002777	0[.]98704444-98704582	-	0	125.37	-inf	0.0011	0.36803	Down							|%IPR001906:Terpene synthase, N-terminal domain :%IPR008930:Terpenoid cyclases/protein prenyltransferase alpha-alpha toroid|	|GO:0010333:terpene synthase activity|GO:0016829:lyase activity|		|GO:0008152:metabolic process|
XLOC_002793	0[.]101538954-101539156	-	317.29	1213.35	-1.93512	0.00045	0.275713	Down							|%IPR013831:SGNH hydrolase-type esterase domain :|	|GO:0016787:hydrolase activity|
XLOC_002820	0[.]107441741-107441947	-	11.3335	0	inf	0.00065	0.307223	Up
XLOC_002841	0[.]111776323-111776545	-	27.6099	71.4302	-1.37135	0.0431	0.996326	Down
XLOC_002880	0[.]117896868-117897016	-	43.3101	0	inf	0.00555	0.671798	Up
XLOC_002906	0[.]122441581-122441787	-	31.1671	94.6478	-1.60255	0.0221	0.996326	Down
XLOC_003012	0[.]134966317-134966577	-	6.89061	26.7725	-1.95805	0.03215	0.996326	Down
XLOC_003035	0[.]136982614-136982948	-	2.64072	11.4258	-2.11329	0.0447	0.996326	Down
XLOC_003041	0[.]137422383-137422724	-	93.2896	360.587	-1.95056	0.0003	0.235082	Down	pop:POPTR_581883	45	107	3e-22	hypothetical protein		|%IPR013831:SGNH hydrolase-type esterase domain :|	|GO:0016787:hydrolase activity|
XLOC_003047	0[.]137964441-137964783	-	11.7939	2.11679	2.47809	0.04095	0.996326	Up							|%IPR021929:Late blight resistance protein R1 :|
XLOC_003057	0[.]139085462-139085817	-	13.7804	34.2973	-1.31547	0.03575	0.996326	Down
XLOC_003094	0[.]142340820-142340978	-	264.418	67.691	1.96578	0.02605	0.996326	Up	rcu:RCOM_0305430	66	69.7	6e-11	heavy metal cation transport atpase, putative (EC:3.6.3.5); K01534 Cd2+/Zn2+-exporting ATPase [EC:3.6.3.3 3.6.3.5]	|Unclassified; Metabolism; Energy metabolism|	|%IPR001757:Cation-transporting P-type ATPase :%IPR027265:Divalent cation-transporting P-type ATPase|	|GO:0019829:cation-transporting ATPase activity|	|GO:0016021:integral to membrane|	|GO:0006812:cation transport|
XLOC_003096	0[.]142508858-142509228	-	0.920601	0	inf	0.0419	0.996326	Up
XLOC_003211	0[.]155655860-155656304	-	52.5976	106.092	-1.01224	0.04915	0.996326	Down	pop:POPTR_833417	63	178	1e-43	hypothetical protein		|%IPR005519:Acid phosphatase (Class B) :|	|GO:0003993:acid phosphatase activity|
XLOC_003216	0[.]157044548-157045086	-	4.37623	11.6808	-1.41638	0.0362	0.996326	Down	vvi:100249336	54	170	4e-41	hypothetical protein LOC100249336		|%IPR010821:Chlorophyllase :|	|GO:0047746:chlorophyllase activity|		|GO:0015996:chlorophyll catabolic process|
XLOC_003287	0[.]164848336-164848967	-	7.95012	18.2599	-1.19963	0.04305	0.996326	Down
XLOC_003346	0[.]171700622-171701011	-	27.0083	83.7677	-1.63299	0.0053	0.671798	Down
XLOC_003369	0[.]174713136-174713936	-	137.555	322.415	-1.22891	0.0101	0.832124	Down	pop:POPTR_779754	46	83.6	1e-14	hypothetical protein
XLOC_003370	0[.]174724585-174724832	-	29.1151	106.908	-1.87653	0.00415	0.646987	Down	vvi:100260678	64	70.5	4e-11	hypothetical protein LOC100260678
XLOC_003373	0[.]175393293-175394115	-	67.0604	152.505	-1.18532	0.0156	0.936535	Down	vvi:100257701	66	306	9e-82	hypothetical protein LOC100257701		|%IPR003593:AAA+ ATPase domain :%IPR003959:ATPase, AAA-type, core|	|GO:0000166:nucleotide binding|GO:0005524:ATP binding|GO:0017111:nucleoside-triphosphatase activity|
XLOC_003470	0[.]193098584-193098815	-	3.32733	0	inf	0.02425	0.996326	Up
XLOC_003497	0[.]197593602-197594351	-	11.9482	4.57403	1.38526	0.0283	0.996326	Up
XLOC_003526	0[.]205055531-205056347	-	0.700714	2.70751	-1.95007	0.04855	0.996326	Down
XLOC_003543	0[.]212196311-212198011	-	3.28303	0.00279399	10.1985	0.03325	0.996326	Up
XLOC_003560	0[.]219660536-219661323	-	0	0.445191	-inf	0.0069	0.739361	Down
XLOC_003575	0[.]224075214-224075854	-	56.8912	217.798	-1.93672	0.0003	0.235082	Down	vvi:100252867	48	144	3e-33	hypothetical protein LOC100252867		|%IPR013831:SGNH hydrolase-type esterase domain :|	|GO:0016787:hydrolase activity|
XLOC_003630	0[.]256640930-256641785	-	3.43446	0.79992	2.10215	0.0293	0.996326	Up
XLOC_003634	0[.]260309284-260309952	-	78.4458	172.2	-1.13431	0.0207	0.996326	Down
XLOC_003758	0[.]377874019-377874346	-	0	2.33065	-inf	0.00345	0.639234	Down
XLOC_003800	0[.]405888105-405890824	-	2.34986	0.794684	1.56412	0.0171	0.966199	Up	vvi:100244309	48	432	0	similar to polyprotein		|%IPR000477:Reverse transcriptase :|	|GO:0003723:RNA binding|GO:0003964:RNA-directed DNA polymerase activity|		|GO:0006278:RNA-dependent DNA replication|
XLOC_003826	0[.]418400178-418400930	-	0.519038	0	inf	0.00555	0.671798	Up	vvi:100263953	52	246	2e-63	hypothetical protein LOC100263953		|%IPR001611:Leucine-rich repeat :%IPR003591:Leucine-rich repeat, typical subtype|	|GO:0005515:protein binding|
XLOC_003827	0[.]418401907-418402738	-	0.456446	0	inf	0.00555	0.671798	Up	rcu:RCOM_0550400	44	231	6e-59	serine-threonine protein kinase, plant-type, putative (EC:1.3.1.74)		|%IPR001611:Leucine-rich repeat :%IPR013210:Leucine-rich repeat-containing N-terminal, type 2|	|GO:0005515:protein binding|
XLOC_003843	0[.]425841747-425842284	-	0.910788	0	inf	0.00385	0.639234	Up	vvi:100262926	45	141	2e-32	hypothetical protein LOC100262926		|%IPR002182:NB-ARC :|	|GO:0043531:ADP binding|
XLOC_003850	0[.]427672497-427674140	-	8.29532	27.9899	-1.75454	0.00155	0.461543	Down	ath:AT4G00980	42	76.3	7e-12	zinc knuckle (CCHC-type) family protein
XLOC_003921	0[.]463600324-463600829	-	8.81136	33.1047	-1.9096	0.00265	0.602359	Down	vvi:100250080	67	71.6	2e-11	hypothetical protein LOC100250080		|%IPR000425:Major intrinsic protein :%IPR022357:Major intrinsic protein, conserved site|	|GO:0005215:transporter activity|	|GO:0016020:membrane|	|GO:0006810:transport|
XLOC_003934	0[.]471425623-471426419	-	0	0.822424	-inf	0.0005	0.275713	Down
XLOC_003952	0[.]478699216-478704144	-	1.74422	5.19106	-1.57345	0.00455	0.671798	Down
XLOC_003957	0[.]481177128-481177706	-	0.817976	0	inf	0.00385	0.639234	Up	vvi:100260442	65	139	9e-42	hypothetical protein LOC100260442		|%IPR001584:Integrase, catalytic core :%IPR012337:Ribonuclease H-like domain|	|GO:0003676:nucleic acid binding|		|GO:0015074:DNA integration|
XLOC_003963	0[.]483964971-483967002	-	0.824278	2.40012	-1.5419	0.0246	0.996326	Down
XLOC_004037	0[.]524905285-524907066	-	0.670655	2.09751	-1.64504	0.0242	0.996326	Down
XLOC_004040	0[.]525171826-525173042	-	1.20746	3.34519	-1.47011	0.03715	0.996326	Down
XLOC_004070	0[.]544454587-544455323	-	15.3219	5.04692	1.60212	0.0107	0.851909	Up	vvi:100257932	71	120	9e-26	hypothetical protein LOC100257932
XLOC_004081	0[.]545605605-545606874	-	2.73822	8.15223	-1.57396	0.01075	0.853607	Down	rcu:RCOM_0281750	34	121	1e-30	hypothetical protein
XLOC_004123	0[.]581765231-581766105	-	1.5132	4.53241	-1.58267	0.0332	0.996326	Down	isc:IscW_ISCW018444	57	79	4e-13	hypothetical protein
XLOC_004129	0[.]585114266-585115285	-	0.531998	0	inf	0.0007	0.325686	Up
XLOC_004160	0[.]606784359-606785751	-	16.1169	44.7164	-1.47223	0.0048	0.671798	Down
XLOC_004203	0[.]640397415-640398170	-	3.35627	10.286	-1.61575	0.0137	0.904534	Down
XLOC_004244	0[.]664337969-664340598	-	9.00712	19.3694	-1.10464	0.0312	0.996326	Down
XLOC_004325	1[+]1058896-1060354	Capana01g000070,	2.29939	8.08003	-1.81311	0.0078	0.756393	Down	vvi:100232899	51	251	5e-65	MYBPA1; MYBPA1 protein; K09422 myb proto-oncogene protein, plant	|Genetic Information Processing; Transcription; Transcription factors [BR:ko03000];|	|%IPR001005:SANT/Myb domain :%IPR009057:Homeodomain-like|	|GO:0003677:DNA binding|GO:0003682:chromatin binding|
XLOC_004384	1[+]4870723-4871617	Capana01g000278,	6.21801	1.78836	1.79782	0.01165	0.88802	Up	pop:POPTR_669475	73	347	8e-94	hypothetical protein		|%IPR001938:Thaumatin :%IPR017949:Thaumatin, conserved site|
XLOC_004386	1[+]4894099-4894983	Capana01g000280,	5.06739	1.10213	2.20095	0.0096	0.823802	Up	vvi:100259841	74	368	1e-100	hypothetical protein		|%IPR001938:Thaumatin :%IPR017949:Thaumatin, conserved site|
XLOC_004387	1[+]4896777-4897649	Capana01g000281,	6.85602	2.70925	1.33948	0.04325	0.996326	Up	pop:POPTR_669475	73	365	3e-99	hypothetical protein		|%IPR001938:Thaumatin :%IPR017949:Thaumatin, conserved site|
XLOC_004420	1[+]7365927-7394111	Capana01g000403,Capana01g000405,Capana01g000406,	57.0293	117.432	-1.04205	0.0338	0.996326	Down	vvi:100265823	46	185	5e-45	hypothetical protein LOC100265823
XLOC_004421	1[+]7418419-7420123	Capana01g000408,	1.14637	4.48031	-1.96653	0.0161	0.941093	Down	rcu:RCOM_1681170	62	154	7e-36	hypothetical protein
XLOC_004429	1[+]7759706-7761529	Capana01g000428,	5.56873	2.43797	1.19167	0.0414	0.996326	Up	rcu:RCOM_1681350	71	704	0	multidrug resistance pump, putative		|%IPR002528:Multi antimicrobial extrusion protein :|	|GO:0015238:drug transmembrane transporter activity|GO:0015297:antiporter activity|	|GO:0016020:membrane|	|GO:0006855:drug transmembrane transport|GO:0055085:transmembrane transport|
XLOC_004448	1[+]8679054-8679684	Capana01g000501,	46.5546	118.467	-1.34749	0.0089	0.795842	Down	vvi:100267804	63	171	3e-41	hypothetical protein LOC100267804		|%IPR016140:Bifunctional inhibitor/plant lipid transfer protein/seed storage helical domain :%IPR027923:Hydrophobic seed protein|
XLOC_004449	1[+]8708901-8709595	Capana01g000502,	74.3937	162.997	-1.13159	0.0204	0.996326	Down	rcu:RCOM_1610700	58	168	3e-40	14 kDa proline-rich protein DC2.15 precursor, putative		|%IPR016140:Bifunctional inhibitor/plant lipid transfer protein/seed storage helical domain :%IPR027923:Hydrophobic seed protein|
XLOC_004450	1[+]8808951-8809585	Capana01g000503,	11.4228	26.6467	-1.22204	0.03545	0.996326	Down	vvi:100267804	60	176	8e-43	hypothetical protein LOC100267804		|%IPR016140:Bifunctional inhibitor/plant lipid transfer protein/seed storage helical domain :%IPR027923:Hydrophobic seed protein|
XLOC_004451	1[+]8823145-8829320	Capana01g000505,	10.834	5.26251	1.04174	0.0472	0.996326	Up	rcu:RCOM_1679710	83	1316	0	translation elongation factor G, putative; K02355 elongation factor EF-G [EC:3.6.5.3]	|Genetic Information Processing; Translation; Translation factors [BR:ko03012];|	|%IPR000640:Translation elongation factor EFG, V domain :%IPR000795:Elongation factor, GTP-binding domain|	|GO:0003746:translation elongation factor activity|GO:0003924:GTPase activity|GO:0005525:GTP binding|	|GO:0005622:intracellular|	|GO:0006414:translational elongation|
XLOC_004461	1[+]9420624-9421306	Capana01g000533,	6.44001	17.8669	-1.47215	0.01525	0.930531	Down
XLOC_004485	1[+]11633023-11654612	Capana01g000612,	11.4679	4.60305	1.31694	0.006	0.687162	Up	pop:POPTR_553878	43	746	0	hypothetical protein
XLOC_004493	1[+]12353792-12356960	Capana01g000644,	11.2765	4.13757	1.44646	0.00855	0.778573	Up	vvi:100257057	50	444	1e-122	hypothetical protein LOC100257057		|%IPR003851:Zinc finger, Dof-type :|	|GO:0003677:DNA binding|		|GO:0006355:regulation of transcription, DNA-dependent|
XLOC_004557	1[+]18041504-18044079	Capana01g000834,	37.9344	96.3368	-1.34458	0.00795	0.758741	Down	vvi:100259967	40	234	6e-60	hypothetical protein LOC100259967		|%IPR005123:Oxoglutarate/iron-dependent dioxygenase :%IPR027443:Isopenicillin N synthase-like|	|GO:0016491:oxidoreductase activity|GO:0016706:oxidoreductase activity, acting on paired donors, with incorporation or reduction of molecular oxygen, 2-oxoglutarate as one donor, and incorporation of one atom each of oxygen into both donors|		|GO:0055114:oxidation-reduction process|
XLOC_004559	1[+]18077180-18078478	Capana01g000836,	27.7407	62.2423	-1.16589	0.02065	0.996326	Down	vvi:100246633	53	325	4e-87	hypothetical protein LOC100246633		|%IPR000863:Sulfotransferase domain :%IPR027417:P-loop containing nucleoside triphosphate hydrolase|	|GO:0008146:sulfotransferase activity|
XLOC_004603	1[+]27291313-27293785	-	7.21389	18.8649	-1.38686	0.0141	0.91398	Down	vvi:100247765	68	470	1e-130	hypothetical protein LOC100247765		|%IPR002680:Alternative oxidase :|	|GO:0009916:alternative oxidase activity|		|GO:0055114:oxidation-reduction process|
XLOC_004622	1[+]29183060-29189784	Capana01g001057,	10.2014	5.09801	1.00076	0.0466	0.996326	Up	pop:POPTR_757196	83	1479	0	hypothetical protein; K00697 alpha,alpha-trehalose-phosphate synthase (UDP-forming) [EC:2.4.1.15]; K01087 trehalose-phosphatase [EC:3.1.3.12]	|Metabolism; Carbohydrate Metabolism; Starch and sucrose metabolism [PATH:ko00500-Map:ko00500];|Metabolism; Glycan Biosynthesis and Metabolism; Glycosyltransferases [BR:ko01003];|	|%IPR001830:Glycosyl transferase, family 20 :%IPR003337:Trehalose-phosphatase|	|GO:0003824:catalytic activity|		|GO:0005992:trehalose biosynthetic process|GO:0008152:metabolic process|
XLOC_004633	1[+]30510919-30641829	Capana01g001100,	6.03054	24.4588	-2.01999	0.0009	0.367114	Down	vvi:100250080	62	275	5e-72	hypothetical protein LOC100250080		|%IPR000425:Major intrinsic protein :%IPR022357:Major intrinsic protein, conserved site|	|GO:0005215:transporter activity|	|GO:0016020:membrane|	|GO:0006810:transport|
XLOC_004700	1[+]44621018-44625040	Capana01g001340,	3.22635	1.33399	1.27416	0.0357	0.996326	Up	rcu:RCOM_1613010	71	1068	0	Xylem serine proteinase 1 precursor, putative (EC:1.3.1.74)		|%IPR000209:Peptidase S8/S53 domain :%IPR009020:Proteinase inhibitor, propeptide|	|GO:0004252:serine-type endopeptidase activity|GO:0042802:identical protein binding|		|GO:0006508:proteolysis|GO:0043086:negative regulation of catalytic activity|
XLOC_004707	1[+]44892815-44894080	Capana01g001360,	2.39744	0.622368	1.94565	0.02685	0.996326	Up	vvi:100245486	64	305	6e-81	hypothetical protein LOC100245486		|%IPR001471:AP2/ERF domain :%IPR016177:DNA-binding domain|	|GO:0003677:DNA binding|GO:0003700:sequence-specific DNA binding transcription factor activity|		|GO:0006355:regulation of transcription, DNA-dependent|
XLOC_004729	1[+]45802433-45803391	Capana01g001433,	5.69668	14.6879	-1.36644	0.0206	0.996326	Down	vvi:100248930	52	167	1e-39	hypothetical protein LOC100248930		|%IPR000008:C2 calcium-dependent membrane targeting :%IPR008973:C2 calcium/lipid-binding domain, CaLB|	|GO:0005515:protein binding|
XLOC_004735	1[+]47738233-47739537	Capana01g001488,	158.104	367.591	-1.21723	0.01135	0.880127	Down	hmg:100200685	38	85.1	8e-15	hypothetical protein LOC100200685
XLOC_004742	1[+]48097990-48099460	Capana01g001497,	3.16201	1.23223	1.35957	0.04365	0.996326	Up	ath:AT5G06630	42	281	7e-74	proline-rich extensin-like family protein
XLOC_004754	1[+]50338097-50362729	Capana01g001537,Capana01g001538,Capana01g001539,	19.3143	8.40756	1.19991	0.0105	0.845023	Up	vvi:100265625	87	3451	0	similar to Callose synthase 3; K11000 callose synthase [EC:2.4.1.-]	|Metabolism; Glycan Biosynthesis and Metabolism; Glycosyltransferases [BR:ko01003];|	|%IPR003440:Glycosyl transferase, family 48 :%IPR023175:Vacuolar protein sorting-associate protein Vta1/Callose synthase, N-terminal domain|	|GO:0003843:1,3-beta-D-glucan synthase activity|	|GO:0000148:1,3-beta-D-glucan synthase complex|GO:0016020:membrane|	|GO:0006075:(1-&gt;3)-beta-D-glucan biosynthetic process|
XLOC_004755	1[+]50397257-50449720	Capana01g001540,	8.11709	3.85992	1.07239	0.03515	0.996326	Up	rcu:RCOM_0146080	78	3095	0	1,3-beta-glucan synthase, putative (EC:2.4.1.34); K11000 callose synthase [EC:2.4.1.-]	|Metabolism; Glycan Biosynthesis and Metabolism; Glycosyltransferases [BR:ko01003];|	|%IPR003440:Glycosyl transferase, family 48 :%IPR026899:1,3-beta-glucan synthase subunit FKS1-like, domain-1|	|GO:0003843:1,3-beta-D-glucan synthase activity|	|GO:0000148:1,3-beta-D-glucan synthase complex|GO:0016020:membrane|	|GO:0006075:(1-&gt;3)-beta-D-glucan biosynthetic process|
XLOC_004778	1[+]54916849-54923995	Capana01g001622,	42.0064	114.676	-1.44889	0.00345	0.639234	Down	vvi:100259967	47	323	2e-86	hypothetical protein LOC100259967		|%IPR005123:Oxoglutarate/iron-dependent dioxygenase :%IPR026992:Non-haem dioxygenase N-terminal domain|	|GO:0016491:oxidoreductase activity|GO:0016706:oxidoreductase activity, acting on paired donors, with incorporation or reduction of molecular oxygen, 2-oxoglutarate as one donor, and incorporation of one atom each of oxygen into both donors|		|GO:0055114:oxidation-reduction process|
XLOC_004802	1[+]61321506-61340065	Capana01g001721,	9.3571	3.98422	1.23176	0.03485	0.996326	Up	vvi:100244919	68	632	1e-179	hypothetical protein LOC100244919		|%IPR006073:GTP binding domain :%IPR027417:P-loop containing nucleoside triphosphate hydrolase|	|GO:0005525:GTP binding|
XLOC_004867	1[+]92130172-92137315	-	16.0204	38.0074	-1.24637	0.01875	0.996326	Down
XLOC_004875	1[+]101773700-101775613	Capana01g002067,	1.21686	3.71282	-1.60936	0.0261	0.996326	Down
XLOC_004946	1[+]149058856-149064557	Capana01g002345,	45.2051	100.09	-1.14674	0.0198	0.996326	Down	pop:POPTR_833345	64	268	5e-70	hypothetical protein		|%IPR008598:Drought induced 19 protein-like, zinc-binding domain :%IPR027935:Protein dehydration-induced 19, C-terminal|
XLOC_004947	1[+]149119206-149124677	Capana01g002347,	8.16364	3.67142	1.15288	0.04945	0.996326	Up	vvi:100255113	63	773	0	hypothetical protein LOC100255113		|%IPR001313:Pumilio RNA-binding repeat :%IPR011989:Armadillo-like helical|	|GO:0003723:RNA binding|GO:0005488:binding|
XLOC_004956	1[+]152203298-152203841	Capana01g002373,	5.29404	14.9822	-1.50081	0.02115	0.996326	Down
XLOC_004998	1[+]166738248-166760451	Capana01g002553,	4.13234	1.48542	1.47608	0.0431	0.996326	Up	rcu:RCOM_1264750	74	1763	0	DNA-directed RNA polymerase I subunit, putative; K03002 DNA-directed RNA polymerase I subunit RPA2 [EC:2.7.7.6]	|Genetic Information Processing; Transcription; RNA polymerase [PATH:ko03020-Map:ko03020];|Metabolism; Nucleotide Metabolism; Purine metabolism [PATH:ko00230-Map:ko00230];|Metabolism; Nucleotide Metabolism; Pyrimidine metabolism [PATH:ko00240-Map:ko00240];|	|%IPR007120:DNA-directed RNA polymerase, subunit 2, domain 6 :%IPR007121:RNA polymerase, beta subunit, conserved site|	|GO:0003677:DNA binding|GO:0003899:DNA-directed RNA polymerase activity|GO:0032549:ribonucleoside binding|	|GO:0005634:nucleus|	|GO:0006351:transcription, DNA-dependent|
XLOC_005009	1[+]167972969-167979439	Capana01g002580,	6.514	19.5606	-1.58633	0.00555	0.671798	Down	pop:POPTR_1110522	60	280	1e-73	hypothetical protein		|%IPR005181:Domain of unknown function DUF303, acetylesterase putative :|
XLOC_005017	1[+]168666763-168678145	Capana01g002604,	103.495	43.1346	1.26264	0.0085	0.778573	Up	rcu:RCOM_0492910	71	731	0	DNA-damage-inducible protein f, putative		|%IPR002528:Multi antimicrobial extrusion protein :|	|GO:0015238:drug transmembrane transporter activity|GO:0015297:antiporter activity|	|GO:0016020:membrane|	|GO:0006855:drug transmembrane transport|GO:0055085:transmembrane transport|
XLOC_005041	1[+]171552037-171585470	Capana01g002677,	2.55506	1.00744	1.34266	0.02395	0.996326	Up	vvi:100249983	70	1505	0	hypothetical protein LOC100249983		|%IPR003395:RecF/RecN/SMC, N-terminal :%IPR027131:Structural maintenance of chromosomes protein 5|		|GO:0030915:Smc5-Smc6 complex|	|GO:0000724:double-strand break repair via homologous recombination|GO:0006281:DNA repair|
XLOC_005062	1[+]175041177-175045171	Capana01g002751,	21.1826	8.6706	1.28868	0.01745	0.974876	Up	vvi:100244520	60	464	1e-129	hypothetical protein LOC100244520; K13947 auxin efflux carrier family		|%IPR004776:Auxin efflux carrier :%IPR014024:Auxin efflux carrier, plant type|		|GO:0016021:integral to membrane|	|GO:0055085:transmembrane transport|
XLOC_005073	1[+]177182238-177186606	Capana01g002785,	2.41295	6.37657	-1.40199	0.028	0.996326	Down	pop:POPTR_414804	62	445	1e-123	hypothetical protein
XLOC_005150	1[+]203226744-203229295	Capana01g003065,	7.92755	20.6419	-1.38063	0.0465	0.996326	Down	vvi:100259606	60	556	1e-156	hypothetical protein LOC100259606
XLOC_005174	1[+]209653777-209654345	Capana01g003140,	1.12193	8.84102	-2.97823	0.01255	0.892621	Down	rcu:RCOM_0680270	83	181	3e-44	glutaredoxin, grx, putative		|%IPR002109:Glutaredoxin :%IPR011905:Glutaredoxin-like, plant II|	|GO:0009055:electron carrier activity|GO:0015035:protein disulfide oxidoreductase activity|		|GO:0045454:cell redox homeostasis|
XLOC_005176	1[+]210054784-210072449	Capana01g003142,	6.09827	2.66769	1.19281	0.0243	0.996326	Up	rcu:RCOM_0680380	53	1093	0	always early, putative		|%IPR001005:SANT/Myb domain :%IPR009057:Homeodomain-like|	|GO:0003677:DNA binding|GO:0003682:chromatin binding|
XLOC_005218	1[+]222335924-222339834	Capana01g003273,	2.06183	0	inf	0.0419	0.996326	Up	vvi:100259253	69	119	7e-26	hypothetical protein LOC100259253		|%IPR002939:Chaperone DnaJ, C-terminal :%IPR008971:HSP40/DnaJ peptide-binding|	|GO:0051082:unfolded protein binding|		|GO:0006457:protein folding|
XLOC_005284	1[+]227967503-227968220	Capana01g003492,	446.282	108.478	2.04056	0.0001	0.13535	Up	rcu:RCOM_1608400	41	122	3e-26	Ethylene-responsive transcription factor, putative		|%IPR001471:AP2/ERF domain :%IPR016177:DNA-binding domain|	|GO:0003677:DNA binding|GO:0003700:sequence-specific DNA binding transcription factor activity|		|GO:0006355:regulation of transcription, DNA-dependent|
XLOC_005286	1[+]228205188-228206031	Capana01g003504,	92.1124	293.331	-1.67106	0.0011	0.36803	Down	vvi:100247982	55	133	1e-29	hypothetical protein LOC100247982		|%IPR001471:AP2/ERF domain :%IPR016177:DNA-binding domain|	|GO:0003677:DNA binding|GO:0003700:sequence-specific DNA binding transcription factor activity|		|GO:0006355:regulation of transcription, DNA-dependent|
XLOC_005310	1[+]229375641-229378198	Capana01g003561,	27.9287	61.1998	-1.13178	0.0263	0.996326	Down	pop:POPTR_677577	74	377	1e-103	hypothetical protein		|%IPR004331:SPX, N-terminal :|
XLOC_005338	1[+]231662761-231667002	Capana01g003640,	23.9854	11.5969	1.04842	0.04765	0.996326	Up	vvi:100247635	70	1353	0	hypothetical protein LOC100247635		|%IPR000719:Protein kinase domain :%IPR001611:Leucine-rich repeat|	|GO:0004672:protein kinase activity|GO:0004674:protein serine/threonine kinase activity|GO:0004713:protein tyrosine kinase activity|GO:0005515:protein binding|GO:0005524:ATP binding|GO:0016772:transferase activity, transferring phosphorus-containing groups|		|GO:0006468:protein phosphorylation|
XLOC_005360	1[+]239902902-239906851	-	153.497	382.48	-1.31717	0.00695	0.739361	Down	vvi:100266435	67	249	2e-64	hypothetical protein LOC100266435		|%IPR006461:Uncharacterised protein family Cys-rich :|
XLOC_005394	1[+]269162713-269168892	Capana01g003920,	231.145	689.737	-1.57725	0.00165	0.466075	Down	vvi:100254055	50	372	1e-101	hypothetical protein LOC100254055		|%IPR002641:Patatin/Phospholipase A2-related :%IPR016035:Acyl transferase/acyl hydrolase/lysophospholipase|			|GO:0006629:lipid metabolic process|GO:0008152:metabolic process|
XLOC_005403	1[+]272744393-272749205	Capana01g003965,	36.383	90.6778	-1.31748	0.00745	0.744425	Down	vvi:100258141	57	539	1e-151	hypothetical protein LOC100258141; K01590 histidine decarboxylase [EC:4.1.1.22]	|Metabolism; Amino Acid Metabolism; Histidine metabolism [PATH:ko00340-Map:ko00340];|	|%IPR002129:Pyridoxal phosphate-dependent decarboxylase :%IPR015421:Pyridoxal phosphate-dependent transferase, major region, subdomain 1|	|GO:0003824:catalytic activity|GO:0016831:carboxy-lyase activity|GO:0030170:pyridoxal phosphate binding|		|GO:0019752:carboxylic acid metabolic process|
XLOC_005419	1[+]278453953-278455142	Capana01g004034,	15.9062	6.79167	1.22775	0.02935	0.996326	Up	vvi:100263835	58	142	4e-32	similar to GDU1
XLOC_005421	1[+]279138773-279147325	Capana01g004043,	3.56201	1.57144	1.1806	0.0259	0.996326	Up	pop:POPTR_796990	31	436	1e-119	cc-nbs-lrr resistance protein		|%IPR000767:Disease resistance protein :%IPR001611:Leucine-rich repeat|	|GO:0005515:protein binding|GO:0043531:ADP binding|		|GO:0006952:defense response|
XLOC_005422	1[+]279262369-279282514	-	6.42709	16.5807	-1.36726	0.0357	0.996326	Down
XLOC_005429	1[+]280890011-280891078	Capana01g004061,Capana01g004062,	1.2211	5.09449	-2.06076	0.0073	0.739361	Down	rcu:RCOM_0962240	57	94	1e-36	Alliin lyase 1 precursor, putative (EC:4.4.1.4)		|%IPR006947:EGF-like, alliinase :%IPR006948:Allinase, C-terminal|	|GO:0003824:catalytic activity|GO:0016846:carbon-sulfur lyase activity|GO:0030170:pyridoxal phosphate binding|
XLOC_005442	1[+]283384954-283388476	-	2.43204	6.76646	-1.47623	0.03365	0.996326	Down
XLOC_005467	1[+]288317636-288321816	Capana01g004213,	1.13213	3.16739	-1.48426	0.02575	0.996326	Down	vvi:100261448	61	192	7e-47	hypothetical protein LOC100261448		|%IPR003480:Transferase :%IPR023213:Chloramphenicol acetyltransferase-like domain|	|GO:0016747:transferase activity, transferring acyl groups other than amino-acyl groups|
XLOC_005496	1[+]297364638-297381412	-	118.312	3.91416	4.91775	0.00525	0.671798	Up
XLOC_005502	1[+]297717626-297724873	Capana01g004368,	214.435	104.641	1.03509	0.02835	0.996326	Up	pop:POPTR_743181	74	904	0	hypothetical protein		|%IPR000109:Proton-dependent oligopeptide transporter family :%IPR016196:Major facilitator superfamily domain, general substrate transporter|	|GO:0005215:transporter activity|	|GO:0016020:membrane|	|GO:0006810:transport|
XLOC_005519	1[+]299114445-299126090	Capana01g004396,	8.05083	3.96849	1.02055	0.0453	0.996326	Up	pop:POPTR_799706	55	1441	0	hypothetical protein		|%IPR024340:Sec16, central conserved domain :%IPR024880:COPII coat assembly protein, Sec16|			|GO:0048208:COPII vesicle coating|
XLOC_005528	1[+]299569951-299574727	-	1.26928	0.274627	2.20847	0.0167	0.952636	Up	vvi:100247282	70	1003	0	hypothetical protein LOC100247282
XLOC_005532	1[+]299731960-299735183	Capana01g004425,	49.6456	134.137	-1.43397	0.0057	0.679435	Down	vvi:100250515	50	140	6e-32	hypothetical protein LOC100250515
XLOC_005540	1[+]300113213-300120006	Capana01g004450,	1.40598	0.47042	1.57955	0.0199	0.996326	Up	vvi:100261513	53	1030	0	hypothetical protein LOC100261513		|%IPR019448:EEIG1/EHBP1 N-terminal domain :|
XLOC_005572	1[-]825177-829284	Capana01g000048,	23.0606	55.8296	-1.2756	0.0122	0.891872	Down	pop:POPTR_709036	80	724	0	methionine gamma-lyase (EC:4.4.1.11); K01761 methionine-gamma-lyase [EC:4.4.1.11]	|Metabolism; Amino Acid Metabolism; Cysteine and methionine metabolism [PATH:ko00270-Map:ko00270];|Metabolism; Metabolism of Other Amino Acids; Selenocompound metabolism [PATH:ko00450-Map:ko00450];|	|%IPR000277:Cys/Met metabolism, pyridoxal phosphate-dependent enzyme :%IPR015421:Pyridoxal phosphate-dependent transferase, major region, subdomain 1|	|GO:0003824:catalytic activity|GO:0030170:pyridoxal phosphate binding|
XLOC_005583	1[-]987306-989711	Capana01g000065,	10.0436	2.16265	2.2154	0.0004	0.264684	Up	pop:POPTR_839307	55	535	1e-150	hypothetical protein		|%IPR020966:Aluminum-activated malate transporter :|			|GO:0015743:malate transport|
XLOC_005596	1[-]1501410-1506905	Capana01g000097,	40.9555	16.28	1.33095	0.00725	0.739361	Up	rcu:RCOM_1312240	62	1171	0	transcription factor, putative		|%IPR000270:Phox/Bem1p :%IPR003035:RWP-RK domain|	|GO:0005515:protein binding|
XLOC_005713	1[-]7925654-7929044	Capana01g000441,	12.1522	36.9097	-1.60278	0.00335	0.639234	Down	vvi:100244514	69	320	9e-86	hypothetical protein LOC100244514		|%IPR011598:Myc-type, basic helix-loop-helix (bHLH) domain :|	|GO:0046983:protein dimerization activity|
XLOC_005785	1[-]12893652-12894819	Capana01g000661,	27.7869	68.9147	-1.31041	0.0097	0.827613	Down	rcu:RCOM_0191940	41	186	3e-45	Ethylene-responsive transcription factor 1A, putative		|%IPR001471:AP2/ERF domain :%IPR016177:DNA-binding domain|	|GO:0003677:DNA binding|GO:0003700:sequence-specific DNA binding transcription factor activity|		|GO:0006355:regulation of transcription, DNA-dependent|
XLOC_005800	1[-]14380967-14383512	Capana01g000714,	12.9629	29.9786	-1.20954	0.02465	0.996326	Down	rcu:RCOM_0120910	50	255	3e-66	Major pollen allergen Ory s 1 precursor, putative		|%IPR007112:Expansin/pollen allergen, DPBB domain :%IPR007117:Expansin, cellulose-binding-like domain|		|GO:0005576:extracellular region|
XLOC_005817	1[-]15672794-15673652	Capana01g000766,	2.71795	6.71921	-1.30577	0.0494	0.996326	Down	pop:POPTR_580130	52	195	3e-48	hypothetical protein		|%IPR006501:Pectinesterase inhibitor domain :|	|GO:0004857:enzyme inhibitor activity|GO:0030599:pectinesterase activity|
XLOC_005837	1[-]18080244-18082545	Capana01g000837,	1.43468	4.60611	-1.68282	0.00695	0.739361	Down	pop:POPTR_769777	49	353	4e-95	CYP749A6; cytochrome P450		|%IPR001128:Cytochrome P450 :%IPR002401:Cytochrome P450, E-class, group I|	|GO:0005506:iron ion binding|GO:0009055:electron carrier activity|GO:0016705:oxidoreductase activity, acting on paired donors, with incorporation or reduction of molecular oxygen|GO:0020037:heme binding|		|GO:0055114:oxidation-reduction process|
XLOC_005848	1[-]19542639-19547658	Capana01g000872,	20.2502	41.729	-1.04311	0.04115	0.996326	Down	vvi:100260187	76	488	1e-136	hypothetical protein LOC100260187		|%IPR008030:NmrA-like :%IPR016040:NAD(P)-binding domain|
XLOC_005959	1[-]44295061-44297250	Capana01g001320,	3.00941	1.07222	1.48888	0.0203	0.996326	Up	rcu:RCOM_1612580	75	900	0	nucleotide binding protein, putative		|%IPR008985:Concanavalin A-like lectin/glucanases superfamily :%IPR013320:Concanavalin A-like lectin/glucanase, subgroup|
XLOC_005978	1[-]45109450-45110212	Capana01g001373,	19.2849	44.8827	-1.21869	0.0242	0.996326	Down	vvi:100254094	49	181	4e-44	hypothetical protein LOC100254094		|%IPR006501:Pectinesterase inhibitor domain :|	|GO:0004857:enzyme inhibitor activity|GO:0030599:pectinesterase activity|
XLOC_006000	1[-]45640111-45650738	Capana01g001415,Capana01g001416,	1.25294	0.449177	1.47996	0.02625	0.996326	Up	vvi:100260735	58	1003	0	hypothetical protein LOC100260735		|%IPR000253:Forkhead-associated (FHA) domain :%IPR000580:TSC-22 / Dip / Bun|	|GO:0003700:sequence-specific DNA binding transcription factor activity|GO:0005515:protein binding|		|GO:0006355:regulation of transcription, DNA-dependent|
XLOC_006027	1[-]48729445-48744271	-	27.0696	64.8148	-1.25965	0.04925	0.996326	Down
XLOC_006035	1[-]50843165-50847162	Capana01g001554,	23.2329	54.8005	-1.23802	0.0156	0.936535	Down	vvi:100265513	64	439	1e-121	hypothetical protein LOC100265513		|%IPR000823:Plant peroxidase :%IPR002016:Haem peroxidase, plant/fungal/bacterial|	|GO:0004601:peroxidase activity|GO:0020037:heme binding|		|GO:0006979:response to oxidative stress|GO:0055114:oxidation-reduction process|
XLOC_006055	1[-]55899713-55900976	Capana01g001640,	28.0085	67.8337	-1.27614	0.01745	0.974876	Down	ath:AT1G05760	33	84.3	5e-15	RTM1; RTM1 (restricted tev movement 1); sugar binding
XLOC_006070	1[-]60497306-60501978	Capana01g001693,	5.91943	2.35127	1.33202	0.0225	0.996326	Up	vvi:100265521	66	783	0	hypothetical protein LOC100265521
XLOC_006076	1[-]61307697-61309093	Capana01g001719,	11.3016	26.9876	-1.25577	0.0143	0.915723	Down	vvi:100265871	52	318	5e-85	hypothetical protein LOC100265871		|%IPR002168:Lipase, GDXG, active site :%IPR013094:Alpha/beta hydrolase fold-3|	|GO:0016787:hydrolase activity|		|GO:0008152:metabolic process|
XLOC_006089	1[-]70078109-70111052	-	1.36235	6.10104	-2.16295	0.0091	0.799324	Down
XLOC_006099	1[-]72861180-72862670	Capana01g001837,	13.8121	36.0274	-1.38317	0.01345	0.900001	Down	rcu:RCOM_0952690	33	117	1e-24	small heat-shock protein, putative
XLOC_006156	1[-]111982107-111987352	Capana01g002104,	44.4328	112.072	-1.33473	0.0048	0.671798	Down	pop:POPTR_565414	61	355	4e-96	hypothetical protein
XLOC_006244	1[-]166697896-166699533	-	38.3431	125.516	-1.71083	0.0024	0.558319	Down
XLOC_006266	1[-]169403714-169410503	Capana01g002631,	6.71243	3.18049	1.07759	0.0375	0.996326	Up	vvi:100253371	72	2123	0	hypothetical protein LOC100253371; K03164 DNA topoisomerase II [EC:5.99.1.3]	|Genetic Information Processing; Replication and Repair; Chromosome [BR:ko03036];|Genetic Information Processing; Replication and Repair; DNA replication proteins [BR:ko03032];|	|%IPR001154:DNA topoisomerase II, eukaryotic-type :%IPR001241:DNA topoisomerase, type IIA|	|GO:0003677:DNA binding|GO:0003918:DNA topoisomerase type II (ATP-hydrolyzing) activity|GO:0005524:ATP binding|		|GO:0006259:DNA metabolic process|GO:0006265:DNA topological change|
XLOC_006270	1[-]169684030-169689372	Capana01g002639,	4.6116	1.11625	2.0466	0.00165	0.466075	Up	vvi:100240980	53	616	1e-174	hypothetical protein LOC100240980		|%IPR018034:KRR1 interacting protein 1 :%IPR024626:Kri1-like, C-terminal|
XLOC_006355	1[-]187416936-187418312	Capana01g002937,	9.64255	4.02001	1.26222	0.0312	0.996326	Up	vvi:100252736	39	223	4e-56	hypothetical protein LOC100252736		|%IPR021410:The fantastic four family :|
XLOC_006387	1[-]203232214-203232955	Capana01g003066,	23.063	10.0938	1.1921	0.03725	0.996326	Up	rcu:RCOM_0679040	68	265	2e-69	hypothetical protein
XLOC_006409	1[-]208368754-208375372	Capana01g003120,	2.03628	0.721534	1.49679	0.01575	0.941093	Up	vvi:100266667	40	697	0	hypothetical protein LOC100266667		|%IPR001357:BRCT domain :|
XLOC_006419	1[-]209039984-209056931	Capana01g003138,	9.55832	4.42589	1.11079	0.03225	0.996326	Up	rcu:RCOM_0680240	89	1916	0	helicase, putative (EC:2.7.11.1); K11654 SWI/SNF-related matrix-associated actin-dependent regulator of chromatin subfamily A member 5 [EC:3.6.4.-]	|Genetic Information Processing; Replication and Repair; Chromosome [BR:ko03036];|	|%IPR000330:SNF2-related :%IPR001005:SANT/Myb domain|	|GO:0003676:nucleic acid binding|GO:0003677:DNA binding|GO:0003682:chromatin binding|GO:0004386:helicase activity|GO:0005524:ATP binding|GO:0016818:hydrolase activity, acting on acid anhydrides, in phosphorus-containing anhydrides|GO:0031491:nucleosome binding|	|GO:0005634:nucleus|	|GO:0006338:chromatin remodeling|GO:0043044:ATP-dependent chromatin remodeling|
XLOC_006447	1[-]219871269-219872048	Capana01g003227,	4.87393	16.8652	-1.79089	0.0039	0.639234	Down	vvi:100255610	47	116	1e-24	hypothetical protein LOC100255610
XLOC_006532	1[-]227935403-227939708	Capana01g003488,	3.08198	9.58536	-1.63697	0.00525	0.671798	Down	rcu:RCOM_1608620	75	193	3e-47	Palmitoyl-protein thioesterase 1 precursor, putative (EC:3.1.2.22); K01074 palmitoyl-protein thioesterase [EC:3.1.2.22]	|Cellular Processes; Transport and Catabolism; Lysosome [PATH:ko04142-Map:ko04142];|Metabolism; Lipid Metabolism; Fatty acid elongation in mitochondria [PATH:ko00062-Map:ko00062];|Metabolism; Lipid Metabolism; Lipid biosynthesis proteins [BR:ko01004];|	|%IPR002472:Palmitoyl protein thioesterase :|	|GO:0008474:palmitoyl-(protein) hydrolase activity|		|GO:0006464:cellular protein modification process|
XLOC_006533	1[-]227940294-227941992	-	11.4073	28.5189	-1.32196	0.0135	0.900621	Down	rcu:RCOM_1155070	50	167	1e-39	calcium ion binding protein, putative
XLOC_006539	1[-]228222067-228222790	Capana01g003506,	54.2178	202.464	-1.90083	0.00015	0.148885	Down	vvi:100247982	48	164	5e-39	hypothetical protein LOC100247982		|%IPR001471:AP2/ERF domain :%IPR016177:DNA-binding domain|	|GO:0003677:DNA binding|GO:0003700:sequence-specific DNA binding transcription factor activity|		|GO:0006355:regulation of transcription, DNA-dependent|
XLOC_006540	1[-]228230610-228231373	Capana01g003507,	201.586	682.507	-1.75945	0.00015	0.148885	Down	rcu:RCOM_1608540	48	149	2e-34	Ethylene-responsive transcription factor, putative		|%IPR001471:AP2/ERF domain :%IPR016177:DNA-binding domain|	|GO:0003677:DNA binding|GO:0003700:sequence-specific DNA binding transcription factor activity|		|GO:0006355:regulation of transcription, DNA-dependent|
XLOC_006543	1[-]228396268-228400978	Capana01g003516,	5.25204	2.07253	1.34148	0.0193	0.996326	Up	rcu:RCOM_1608260	78	1136	0	serine/threonine protein kinase, putative (EC:2.7.11.1)		|%IPR000719:Protein kinase domain :%IPR002290:Serine/threonine- / dual specificity protein kinase, catalytic domain|	|GO:0004672:protein kinase activity|GO:0004674:protein serine/threonine kinase activity|GO:0004713:protein tyrosine kinase activity|GO:0005524:ATP binding|GO:0016772:transferase activity, transferring phosphorus-containing groups|		|GO:0006468:protein phosphorylation|
XLOC_006573	1[-]230956094-230958627	Capana01g003618,	99.7083	266.632	-1.41906	0.00295	0.614281	Down	pop:POPTR_802113	74	447	1e-123	hypothetical protein		|%IPR000727:Target SNARE coiled-coil domain :%IPR006011:Syntaxin, N-terminal domain|	|GO:0005484:SNAP receptor activity|GO:0005515:protein binding|	|GO:0016020:membrane|	|GO:0006886:intracellular protein transport|GO:0016192:vesicle-mediated transport|
XLOC_006592	1[-]232417699-232421533	Capana01g003680,	5.50856	50.7197	-3.2028	5e-05	0.0875794	Down	pop:POPTR_763038	63	342	2e-92	hypothetical protein		|%IPR002198:Short-chain dehydrogenase/reductase SDR :%IPR002347:Glucose/ribitol dehydrogenase|	|GO:0016491:oxidoreductase activity|		|GO:0008152:metabolic process|
XLOC_006609	1[-]241175105-241181384	Capana01g003732,	20.8824	9.45129	1.1437	0.01885	0.996326	Up	vvi:100242432	81	997	0	hypothetical protein LOC100242432		|%IPR020683:Ankyrin repeat-containing domain :|
XLOC_006611	1[-]242705623-242714772	Capana01g003737,	0.320477	1.27446	-1.99159	0.0469	0.996326	Down	pop:POPTR_558455	86	149	1e-33	hypothetical protein; K12195 charged multivesicular body protein 6	|Cellular Processes; Transport and Catabolism; Endocytosis [PATH:ko04144-Map:ko04144];|	|%IPR005024:Snf7 :|			|GO:0015031:protein transport|
XLOC_006616	1[-]245466760-245476140	Capana01g003751,	1.98783	6.21268	-1.64402	0.0099	0.830401	Down	rcu:RCOM_0606150	77	744	0	ankyrin-kinase, putative (EC:2.7.11.25)		|%IPR000719:Protein kinase domain :%IPR001245:Serine-threonine/tyrosine-protein kinase catalytic domain|	|GO:0004672:protein kinase activity|GO:0004674:protein serine/threonine kinase activity|GO:0004713:protein tyrosine kinase activity|GO:0005515:protein binding|GO:0005524:ATP binding|GO:0016772:transferase activity, transferring phosphorus-containing groups|		|GO:0006468:protein phosphorylation|GO:0009966:regulation of signal transduction|
XLOC_006628	1[-]253550763-253553310	-	1.1145	3.0088	-1.43278	0.04835	0.996326	Down
XLOC_006665	1[-]272577172-272579773	Capana01g003963,	15.0354	36.9727	-1.29809	0.0258	0.996326	Down	vvi:100258141	41	112	9e-24	hypothetical protein LOC100258141; K01590 histidine decarboxylase [EC:4.1.1.22]	|Metabolism; Amino Acid Metabolism; Histidine metabolism [PATH:ko00340-Map:ko00340];|
XLOC_006691	1[-]280702550-280719798	Capana01g004057,	1.75157	0.581621	1.5905	0.00725	0.739361	Up	vvi:100260617	44	2177	0	hypothetical protein LOC100260617		|%IPR009053:Prefoldin :|
XLOC_006711	1[-]285916587-285918946	Capana01g004167,	8.20806	22.4677	-1.45274	0.0105	0.845023	Down	vvi:100232899	44	235	4e-60	MYBPA1; MYBPA1 protein; K09422 myb proto-oncogene protein, plant	|Genetic Information Processing; Transcription; Transcription factors [BR:ko03000];|	|%IPR001005:SANT/Myb domain :%IPR009057:Homeodomain-like|	|GO:0003677:DNA binding|GO:0003682:chromatin binding|
XLOC_006758	1[-]297727379-297733629	Capana01g004369,	15.485	6.30942	1.29529	0.04175	0.996326	Up	rcu:RCOM_1278010	65	701	0	type I inositol polyphosphate 5-phosphatase, putative (EC:1.3.1.74)		|%IPR000300:Inositol polyphosphate-related phosphatase :%IPR005135:Endonuclease/exonuclease/phosphatase|			|GO:0046856:phosphatidylinositol dephosphorylation|
XLOC_006778	1[-]299724039-299725066	Capana01g004424,	15.5991	46.5751	-1.57809	0.00425	0.652331	Down	vvi:100253894	49	179	2e-43	hypothetical protein LOC100253894		|%IPR006501:Pectinesterase inhibitor domain :|	|GO:0004857:enzyme inhibitor activity|GO:0030599:pectinesterase activity|
XLOC_006800	1[-]300742112-300745209	Capana01g004472,	102.405	280.361	-1.453	0.00235	0.555365	Down	rcu:RCOM_1691430	51	346	2e-93	hypothetical protein		|%IPR003657:DNA-binding WRKY :|	|GO:0003700:sequence-specific DNA binding transcription factor activity|GO:0043565:sequence-specific DNA binding|		|GO:0006355:regulation of transcription, DNA-dependent|
XLOC_006818	1[.]2038884-2039829	-	17.6269	53.7526	-1.60855	0.00325	0.639234	Down	vvi:100263980	32	108	5e-22	hypothetical protein LOC100263980
XLOC_006820	1[.]2161232-2162041	-	25.0795	10.6833	1.23116	0.0301	0.996326	Up	ath:AT1G64160	61	225	3e-57	disease resistance-responsive family protein / dirigent family protein		|%IPR004265:Plant disease resistance response protein :|
XLOC_006859	1[.]6485193-6485853	-	0.766547	5.76797	-2.91162	0.0219	0.996326	Down
XLOC_006959	1[.]44346602-44347268	-	0.732138	0	inf	0.0017	0.466075	Up	zma:100502416	39	77	9e-13	hypothetical protein LOC100502416
XLOC_006960	1[.]44646346-44647775	-	0.787457	2.15308	-1.45113	0.0488	0.996326	Down
XLOC_006964	1[.]45736075-45736750	-	6.29069	16.0025	-1.34701	0.02605	0.996326	Down	osa:9267389	48	82	3e-14	Os04g0654400
XLOC_007047	1[.]113468522-113472238	-	2.16234	0.663488	1.70445	0.0083	0.774573	Up	vvi:100244309	47	617	0	similar to polyprotein		|%IPR000477:Reverse transcriptase :|	|GO:0003723:RNA binding|GO:0003964:RNA-directed DNA polymerase activity|		|GO:0006278:RNA-dependent DNA replication|
XLOC_007051	1[.]124593632-124596019	-	1.05484	4.90987	-2.21867	0.0005	0.275713	Down	pop:POPTR_587321	45	151	1e-48	hypothetical protein
XLOC_007078	1[.]166697905-166698834	-	3.09463	0.00207636	10.5415	0.0225	0.996326	Up
XLOC_007163	1[.]219893572-219894309	-	222.332	497.586	-1.16223	0.01525	0.930531	Down	pop:POPTR_672704	62	89.7	2e-16	hypothetical protein
XLOC_007191	1[.]227964163-227965273	-	3.6493	11.5123	-1.65748	0.00775	0.754156	Down
XLOC_007197	1[.]229170528-229172162	-	0.759427	2.17648	-1.51902	0.0373	0.996326	Down
XLOC_007209	1[.]240004565-240006428	-	0.638058	1.79547	-1.4926	0.03855	0.996326	Down	pop:POPTR_583736	39	62	5e-13	hypothetical protein
XLOC_007244	1[.]267592528-267593290	-	0.510182	0	inf	0.00555	0.671798	Up
XLOC_007367	10[+]1350832-1356064	Capana10g000097,	1.60421	0.522236	1.61909	0.0364	0.996326	Up	vvi:100255533	54	661	0	hypothetical protein LOC100255533		|%IPR011990:Tetratricopeptide-like helical :%IPR012336:Thioredoxin-like fold|	|GO:0005515:protein binding|		|GO:0045454:cell redox homeostasis|
XLOC_007374	10[+]2188336-2192544	Capana10g000125,	10.5249	23.8822	-1.18213	0.04195	0.996326	Down	vvi:100257244	70	177	4e-43	hypothetical protein LOC100257244		|%IPR012946:X8 :|
XLOC_007398	10[+]3424758-3427509	Capana10g000184,	2.06693	0.8609	1.26357	0.0465	0.996326	Up	vvi:100251571	70	762	0	hypothetical protein LOC100251571		|%IPR005225:Small GTP-binding protein domain :%IPR006073:GTP binding domain|	|GO:0005525:GTP binding|
XLOC_007400	10[+]3483384-3488445	Capana10g000190,	464.121	198.223	1.22738	0.00855	0.778573	Up	rcu:RCOM_0104810	93	1304	0	heat shock protein, putative; K04079 molecular chaperone HtpG	|Genetic Information Processing; Folding, Sorting and Degradation; Chaperones and folding catalysts [BR:ko03110];|Genetic Information Processing; Folding, Sorting and Degradation; Proteasome [BR:ko03051];|Genetic Information Processing; Folding, Sorting and Degradation; Protein processing in endoplasmic reticulum [PATH:ko04141-Map:ko04141];|Human Diseases; Cancers; Pathways in cancer [PATH:ko0520…	|%IPR001404:Heat shock protein Hsp90 family :%IPR003594:Histidine kinase-like ATPase, ATP-binding domain|	|GO:0005524:ATP binding|GO:0051082:unfolded protein binding|		|GO:0006457:protein folding|GO:0006950:response to stress|
XLOC_007407	10[+]3703615-3710095	Capana10g000212,	1.8184	5.9347	-1.7065	0.00405	0.641473	Down	vvi:100264528	70	207	3e-51	hypothetical protein LOC100264528; K06955	|Unclassified; Poorly Characterized; General function prediction only|
XLOC_007418	10[+]4617173-4621475	Capana10g000258,	9.19123	22.8135	-1.31156	0.02385	0.996326	Down	rcu:RCOM_1192930	72	252	2e-65	Protein HVA22, putative		|%IPR004345:TB2/DP1/HVA22-related protein :|
XLOC_007423	10[+]5586808-5592314	Capana10g000271,	24.015	54.0323	-1.16988	0.0183	0.990762	Down	vvi:100263459	62	645	0	hypothetical protein LOC100263459		|%IPR001128:Cytochrome P450 :%IPR002401:Cytochrome P450, E-class, group I|	|GO:0005506:iron ion binding|GO:0009055:electron carrier activity|GO:0016705:oxidoreductase activity, acting on paired donors, with incorporation or reduction of molecular oxygen|GO:0020037:heme binding|		|GO:0055114:oxidation-reduction process|
XLOC_007441	10[+]9007129-9010497	Capana10g000345,	18.4425	77.0479	-2.06272	5e-05	0.0875794	Down	pop:POPTR_785226	42	105	4e-21	hypothetical protein
XLOC_007448	10[+]10510365-10512646	Capana10g000378,	12.3407	31.7891	-1.3651	0.0091	0.799324	Down	vvi:100257429	45	205	5e-51	similar to ring domain containing protein		|%IPR001841:Zinc finger, RING-type :%IPR013083:Zinc finger, RING/FYVE/PHD-type|	|GO:0005515:protein binding|GO:0008270:zinc ion binding|
XLOC_007464	10[+]14193980-14196408	Capana10g000447,	0.469622	1.70798	-1.86272	0.043	0.996326	Down	vvi:100249492	55	351	6e-95	hypothetical protein LOC100249492; K09422 myb proto-oncogene protein, plant	|Genetic Information Processing; Transcription; Transcription factors [BR:ko03000];|	|%IPR001005:SANT/Myb domain :%IPR009057:Homeodomain-like|	|GO:0003677:DNA binding|GO:0003682:chromatin binding|
XLOC_007498	10[+]27562162-27565035	Capana10g000588,	14.4949	38.8673	-1.42301	0.00575	0.679435	Down	vvi:100250414	79	618	1e-175	hypothetical protein LOC100250414; K01696 tryptophan synthase beta chain [EC:4.2.1.20]	|Metabolism; Amino Acid Metabolism; Glycine, serine and threonine metabolism [PATH:ko00260-Map:ko00260];|Metabolism; Amino Acid Metabolism; Phenylalanine, tyrosine and tryptophan biosynthesis [PATH:ko00400-Map:ko00400];|	|%IPR001926:Tryptophan synthase beta subunit-like PLP-dependent enzymes superfamily :%IPR006653:Tryptophan synthase, beta chain, conserved site|	|GO:0004834:tryptophan synthase activity|		|GO:0000162:tryptophan biosynthetic process|GO:0006568:tryptophan metabolic process|
XLOC_007562	10[+]63420672-63426399	-	0.99637	3.26005	-1.71014	0.01465	0.924223	Down	rcu:RCOM_1629040	86	126	2e-76	26S protease regulatory subunit, putative (EC:3.6.4.3); K03062 26S proteasome regulatory subunit T2	|Genetic Information Processing; Folding, Sorting and Degradation; Proteasome [BR:ko03051];|Genetic Information Processing; Folding, Sorting and Degradation; Proteasome [PATH:ko03050-Map:ko03050];|	|%IPR003959:ATPase, AAA-type, core :|	|GO:0005524:ATP binding|
XLOC_007625	10[+]122769847-122773576	Capana10g001173,	8.77253	20.0366	-1.19157	0.02915	0.996326	Down	pop:POPTR_577232	30	89.4	6e-16	hypothetical protein
XLOC_007639	10[+]127720149-127743266	Capana10g001213,Capana10g001215,	7.37587	2.66657	1.46783	0.0052	0.671798	Up	rcu:RCOM_1058020	68	1796	0	phospholipid-transporting atpase, putative (EC:3.6.3.1); K01530 phospholipid-translocating ATPase [EC:3.6.3.1]	|Unclassified; Metabolism; Energy metabolism|	|%IPR001757:Cation-transporting P-type ATPase :%IPR006539:Phospholipid-transporting P-type ATPase, subfamily IV|	|GO:0000166:nucleotide binding|GO:0000287:magnesium ion binding|GO:0004012:phospholipid-translocating ATPase activity|GO:0005524:ATP binding|GO:0019829:cation-transporting ATPase activity|GO:0046872:metal ion binding|	|GO:0016021:integral to membrane|	|GO:0006812:cation transport|GO:0015914:phospholipid transport|
XLOC_007642	10[+]130159508-130161016	Capana10g001230,	45.3208	21.2061	1.09569	0.02955	0.996326	Up	vvi:100255128	48	296	4e-78	hypothetical protein LOC100255128
XLOC_007670	10[+]142372427-142374579	Capana10g001318,	2.55962	0.605291	2.08023	0.00595	0.686718	Up	vvi:100267782	61	717	0	hypothetical protein LOC100267782		|%IPR000070:Pectinesterase, catalytic :%IPR006501:Pectinesterase inhibitor domain|	|GO:0004857:enzyme inhibitor activity|GO:0030599:pectinesterase activity|	|GO:0005618:cell wall|	|GO:0042545:cell wall modification|
XLOC_007672	10[+]142885036-142892225	Capana10g001325,	1.86156	5.40086	-1.53668	0.04635	0.996326	Down	ath:AT3G54020	53	266	5e-78	phosphatidic acid phosphatase-related / PAP2-related		|%IPR025749:Sphingomyelin synthase-like domain :|
XLOC_007687	10[+]147001925-147007201	Capana10g001365,	0.430916	1.44458	-1.74518	0.04475	0.996326	Down	vvi:100266670	74	532	1e-150	hypothetical protein LOC100266670		|%IPR000719:Protein kinase domain :%IPR001245:Serine-threonine/tyrosine-protein kinase catalytic domain|	|GO:0004672:protein kinase activity|GO:0004674:protein serine/threonine kinase activity|GO:0004713:protein tyrosine kinase activity|GO:0005524:ATP binding|GO:0016772:transferase activity, transferring phosphorus-containing groups|		|GO:0006468:protein phosphorylation|
XLOC_007688	10[+]147204167-147205914	Capana10g001367,	13.9698	29.6617	-1.08629	0.03415	0.996326	Down	vvi:100247748	57	469	1e-130	hypothetical protein LOC100247748; K01988 lactosylceramide 4-alpha-galactosyltransferase [EC:2.4.1.228]	|Metabolism; Glycan Biosynthesis and Metabolism; Glycosphingolipid biosynthesis - globo series [PATH:ko00603-Map:ko00603];|Metabolism; Glycan Biosynthesis and Metabolism; Glycosyltransferases [BR:ko01003];|	|%IPR007577:Glycosyltransferase, DXD sugar-binding motif :%IPR007652:Alpha 1,4-glycosyltransferase domain|	|GO:0008378:galactosyltransferase activity|	|GO:0005795:Golgi stack|
XLOC_007772	10[+]173625280-173627608	Capana10g001693,	3.77139	1.45275	1.37631	0.0206	0.996326	Up	rcu:RCOM_0233840	67	904	0	kinase, putative (EC:2.7.11.22)		|%IPR000719:Protein kinase domain :%IPR001220:Legume lectin domain|	|GO:0004672:protein kinase activity|GO:0004674:protein serine/threonine kinase activity|GO:0004713:protein tyrosine kinase activity|GO:0005524:ATP binding|GO:0016772:transferase activity, transferring phosphorus-containing groups|GO:0030246:carbohydrate binding|		|GO:0006468:protein phosphorylation|
XLOC_007811	10[+]186717804-186719778	Capana10g001818,	0.39423	1.80683	-2.19635	0.02635	0.996326	Down	rcu:RCOM_1357530	51	176	5e-42	hypothetical protein
XLOC_007819	10[+]187931804-187932719	-	14.7658	32.5713	-1.14134	0.0346	0.996326	Down
XLOC_007820	10[+]187936353-187937012	-	11.265	27.9259	-1.30976	0.02305	0.996326	Down
XLOC_007833	10[+]190890413-190894612	Capana10g001907,	1.81038	0.468732	1.94946	0.0239	0.996326	Up	rcu:RCOM_0840140	69	570	1e-160	catalytic, putative (EC:2.4.1.224)		|%IPR004263:Exostosin-like :|
XLOC_007845	10[+]192650255-192661516	Capana10g001947,	5.00862	1.92563	1.37908	0.0122	0.891872	Up	vvi:100257983	45	1275	0	hypothetical protein LOC100257983		|%IPR003265:HhH-GPD domain :%IPR003651:Endonuclease III-like, iron-sulphur cluster loop motif|	|GO:0003824:catalytic activity|GO:0004519:endonuclease activity|GO:0051539:4 iron, 4 sulfur cluster binding|		|GO:0006281:DNA repair|GO:0006284:base-excision repair|
XLOC_007858	10[+]194213421-194217490	-	1.5976	4.41049	-1.46503	0.0094	0.816046	Down
XLOC_007882	10[+]197309949-197310896	Capana10g002082,	267.337	538.252	-1.00963	0.0322	0.996326	Down	rcu:RCOM_0437400	56	258	6e-67	syntaxin, plant, putative		|%IPR004864:Late embryogenesis abundant protein, LEA-14 :|
XLOC_007915	10[+]200555714-200557917	Capana10g002201,	1.30673	3.77839	-1.53182	0.02075	0.996326	Down	pop:POPTR_653502	42	175	3e-51	hypothetical protein		|%IPR001005:SANT/Myb domain :%IPR006447:Myb domain, plants|	|GO:0003677:DNA binding|GO:0003682:chromatin binding|
XLOC_007942	10[+]201878896-201888767	Capana10g002275,	1.97708	0.813108	1.28186	0.0397	0.996326	Up	vvi:100250469	77	1585	0	hypothetical protein LOC100250469; K06677 condensin complex subunit 1	|Cellular Processes; Cell Growth and Death; Cell cycle - yeast [PATH:ko04111-Map:ko04111];|Genetic Information Processing; Replication and Repair; Chromosome [BR:ko03036];|	|%IPR007673:Condensin subunit 1 :%IPR011989:Armadillo-like helical|	|GO:0005488:binding|	|GO:0005634:nucleus|	|GO:0007067:mitosis|GO:0007076:mitotic chromosome condensation|GO:0030261:chromosome condensation|
XLOC_007953	10[+]202383797-202399685	Capana10g002315,	1.52796	0.647861	1.23785	0.04575	0.996326	Up	vvi:100251396	57	1400	0	hypothetical protein LOC100251396		|%IPR002464:DNA/RNA helicase, ATP-dependent, DEAH-box type, conserved site :%IPR006554:Helicase-like, DEXD box c2 type|	|GO:0003676:nucleic acid binding|GO:0003677:DNA binding|GO:0004003:ATP-dependent DNA helicase activity|GO:0005524:ATP binding|GO:0008026:ATP-dependent helicase activity|GO:0016817:hydrolase activity, acting on acid anhydrides|GO:0016818:hydrolase activity, acting on acid anhydrides, in phosphorus-containing anhydrides|		|GO:0006139:nucleobase-containing compound metabolic process|
XLOC_007975	10[+]203724482-203726623	Capana10g002413,	8.45593	17.6256	-1.05964	0.0414	0.996326	Down	vvi:100241519	67	345	8e-93	hypothetical protein LOC100241519		|%IPR000225:Armadillo :%IPR011989:Armadillo-like helical|	|GO:0005488:binding|GO:0005515:protein binding|
XLOC_007988	10[+]204058124-204067971	Capana10g002438,	40.8562	20.2602	1.0119	0.03625	0.996326	Up	vvi:100255764	54	639	0	hypothetical protein LOC100255764		|%IPR001229:Mannose-binding lectin :|
XLOC_008003	10[+]204511359-204518255	Capana10g002474,	0.838513	2.62207	-1.6448	0.0178	0.982476	Down	vvi:100252192	76	729	0	hypothetical protein LOC100252192		|%IPR000490:Glycoside hydrolase, family 17 :%IPR012946:X8|	|GO:0003824:catalytic activity|GO:0004553:hydrolase activity, hydrolyzing O-glycosyl compounds|		|GO:0005975:carbohydrate metabolic process|
XLOC_008005	10[+]204742987-204747649	Capana10g002482,	45.9943	21.3469	1.10743	0.028	0.996326	Up	vvi:100263633	74	804	0	hypothetical protein LOC100263633; K09754 p-coumarate 3-hydroxylase [EC:1.14.13.-]	|Metabolism; Amino Acid Metabolism; Phenylalanine metabolism [PATH:ko00360-Map:ko00360];|Metabolism; Biosynthesis of Other Secondary Metabolites; Flavonoid biosynthesis [PATH:ko00941-Map:ko00941];|Metabolism; Biosynthesis of Other Secondary Metabolites; Phenylpropanoid biosynthesis [PATH:ko00940-Map:ko00940];|Metabolism; Biosynthesis of Other Secondary Metabolites; Stilbenoid, diarylheptanoid and…	|%IPR001128:Cytochrome P450 :%IPR002401:Cytochrome P450, E-class, group I|	|GO:0005506:iron ion binding|GO:0009055:electron carrier activity|GO:0016705:oxidoreductase activity, acting on paired donors, with incorporation or reduction of molecular oxygen|GO:0020037:heme binding|		|GO:0055114:oxidation-reduction process|
XLOC_008153	10[-]14371968-14372980	-	120.447	277.892	-1.20612	0.0212	0.996326	Down	vvi:100265131	80	125	8e-28	hypothetical protein LOC100265131
XLOC_008179	10[-]26345757-26346617	-	5.05568	15.8474	-1.64827	0.01505	0.930531	Down
XLOC_008185	10[-]30092845-30095460	-	3.0267	8.99337	-1.57112	0.01355	0.900621	Down	vvi:100256867	44	124	1e-31	hypothetical protein LOC100256867		|%IPR001906:Terpene synthase, N-terminal domain :%IPR008930:Terpenoid cyclases/protein prenyltransferase alpha-alpha toroid|	|GO:0010333:terpene synthase activity|GO:0016829:lyase activity|		|GO:0008152:metabolic process|
XLOC_008186	10[-]30356411-30358279	Capana10g000613,	2.51544	8.10166	-1.68741	0.00755	0.744425	Down	vvi:100245492	61	407	1e-111	hypothetical protein LOC100245492; K09422 myb proto-oncogene protein, plant	|Genetic Information Processing; Transcription; Transcription factors [BR:ko03000];|	|%IPR001005:SANT/Myb domain :%IPR009057:Homeodomain-like|	|GO:0003677:DNA binding|GO:0003682:chromatin binding|
XLOC_008188	10[-]31188227-31200383	-	8.52668	22.8903	-1.42468	0.0266	0.996326	Down
XLOC_008193	10[-]34883236-34885015	Capana10g000647,	4.15952	11.9708	-1.52503	0.00775	0.754156	Down	rcu:RCOM_0130950	57	493	1e-137	DNA binding protein, putative (EC:1.3.1.74)		|%IPR011598:Myc-type, basic helix-loop-helix (bHLH) domain :%IPR025610:Transcription factor MYC/MYB N-terminal|	|GO:0046983:protein dimerization activity|
XLOC_008203	10[-]41973627-41975062	-	18.9456	66.2951	-1.80704	0.00055	0.287322	Down
XLOC_008204	10[-]41993259-41994745	-	11.0362	2.90047	1.92788	0.0345	0.996326	Up
XLOC_008211	10[-]43686327-43714697	Capana10g000733,Capana10g000734,	2.33224	1.03781	1.16817	0.0499	0.996326	Up	vvi:100264308	68	1336	0	hypothetical protein LOC100264308; K11592 endoribonuclease Dicer [EC:3.1.26.-]	|Genetic Information Processing; Replication and Repair; Chromosome [BR:ko03036];|	|%IPR001650:Helicase, C-terminal :%IPR005034:Dicer dimerisation domain|	|GO:0003676:nucleic acid binding|GO:0004386:helicase activity|GO:0005524:ATP binding|GO:0008026:ATP-dependent helicase activity|GO:0016891:endoribonuclease activity, producing 5'-phosphomonoesters|
XLOC_008313	10[-]128628965-128635884	Capana10g001220,	19.7379	3.49331	2.4983	0.0001	0.13535	Up	vvi:100255013	40	178	4e-43	hypothetical protein LOC100255013		|%IPR003657:DNA-binding WRKY :|	|GO:0003700:sequence-specific DNA binding transcription factor activity|GO:0043565:sequence-specific DNA binding|		|GO:0006355:regulation of transcription, DNA-dependent|
XLOC_008366	10[-]152602294-152603639	Capana10g001406,	0.962564	3.48627	-1.85673	0.04775	0.996326	Down	pop:POPTR_819178	80	166	1e-39	hypothetical protein
XLOC_008379	10[-]157157007-157159880	Capana10g001451,	20.9344	55.9817	-1.41908	0.0059	0.686718	Down	ath:AT5G03380	40	175	1e-58	heavy-metal-associated domain-containing protein
XLOC_008400	10[-]165025411-165026871	Capana10g001553,	3.27137	7.86868	-1.26623	0.032	0.996326	Down	vvi:100264788	59	208	9e-68	hypothetical protein LOC100264788		|%IPR002198:Short-chain dehydrogenase/reductase SDR :%IPR002347:Glucose/ribitol dehydrogenase|	|GO:0016491:oxidoreductase activity|		|GO:0008152:metabolic process|
XLOC_008424	10[-]171627681-171632774	Capana10g001654,	12.589	27.6709	-1.13621	0.0339	0.996326	Down	rcu:RCOM_0217990	64	498	1e-139	Leucoanthocyanidin dioxygenase, putative (EC:1.14.11.19)		|%IPR002283:Isopenicillin N synthase :%IPR005123:Oxoglutarate/iron-dependent dioxygenase|	|GO:0005506:iron ion binding|GO:0016491:oxidoreductase activity|GO:0016706:oxidoreductase activity, acting on paired donors, with incorporation or reduction of molecular oxygen, 2-oxoglutarate as one donor, and incorporation of one atom each of oxygen into both donors|		|GO:0055114:oxidation-reduction process|
XLOC_008504	10[-]193068567-193074261	Capana10g001966,	6.6673	3.02467	1.14032	0.0367	0.996326	Up	rcu:RCOM_0014200	50	857	0	serine/threonine protein kinase, putative (EC:2.7.11.1)		|%IPR000719:Protein kinase domain :%IPR002290:Serine/threonine- / dual specificity protein kinase, catalytic domain|	|GO:0004672:protein kinase activity|GO:0004674:protein serine/threonine kinase activity|GO:0004713:protein tyrosine kinase activity|GO:0005524:ATP binding|GO:0016772:transferase activity, transferring phosphorus-containing groups|		|GO:0006468:protein phosphorylation|
XLOC_008533	10[-]197285796-197286719	Capana10g002081,	130.478	277.705	-1.08975	0.02215	0.996326	Down	rcu:RCOM_0437400	56	257	1e-66	syntaxin, plant, putative		|%IPR004864:Late embryogenesis abundant protein, LEA-14 :|
XLOC_008553	10[-]199220697-199232803	Capana10g002138,	13.4803	6.73665	1.00075	0.0433	0.996326	Up	vvi:100241331	74	2462	0	hypothetical protein LOC100241331; K11292 transcription elongation factor SPT6	|Genetic Information Processing; Replication and Repair; Chromosome [BR:ko03036];|	|%IPR000980:SH2 domain :%IPR003029:Ribosomal protein S1, RNA-binding domain|	|GO:0003723:RNA binding|GO:0005515:protein binding|GO:0016788:hydrolase activity, acting on ester bonds|		|GO:0006139:nucleobase-containing compound metabolic process|GO:0006357:regulation of transcription from RNA polymerase II promoter|GO:0032784:regulation of DNA-dependent transcription, elongation|
XLOC_008561	10[-]199525333-199527230	-	6.6815	17.3496	-1.37666	0.02525	0.996326	Down	pop:POPTR_551008	60	111	3e-23	hypothetical protein		|%IPR001005:SANT/Myb domain :%IPR009057:Homeodomain-like|	|GO:0003677:DNA binding|GO:0003682:chromatin binding|
XLOC_008588	10[-]200863740-200897046	Capana10g002220,	3.38473	1.59269	1.08757	0.04595	0.996326	Up	vvi:100250406	61	2035	0	hypothetical protein LOC100250406; K02999 DNA-directed RNA polymerase I subunit RPA1 [EC:2.7.7.6]	|Genetic Information Processing; Transcription; RNA polymerase [PATH:ko03020-Map:ko03020];|Metabolism; Nucleotide Metabolism; Purine metabolism [PATH:ko00230-Map:ko00230];|Metabolism; Nucleotide Metabolism; Pyrimidine metabolism [PATH:ko00240-Map:ko00240];|	|%IPR000722:RNA polymerase, alpha subunit :%IPR006592:RNA polymerase, N-terminal|	|GO:0003677:DNA binding|GO:0003899:DNA-directed RNA polymerase activity|GO:0008270:zinc ion binding|	|GO:0005634:nucleus|	|GO:0006351:transcription, DNA-dependent|
XLOC_008627	10[-]202776297-202780561	Capana10g002347,	1.36389	0.401308	1.76494	0.01015	0.832124	Up	vvi:100258928	75	1325	0	hypothetical protein LOC100258928		|%IPR000719:Protein kinase domain :%IPR001245:Serine-threonine/tyrosine-protein kinase catalytic domain|	|GO:0004672:protein kinase activity|GO:0004713:protein tyrosine kinase activity|GO:0005515:protein binding|GO:0005524:ATP binding|GO:0016772:transferase activity, transferring phosphorus-containing groups|		|GO:0006468:protein phosphorylation|
XLOC_008653	10[-]203790494-203793479	-	0.997351	0.24077	2.05045	0.04405	0.996326	Up	vvi:100265003	32	298	1e-112	hypothetical protein LOC100265003		|%IPR000767:Disease resistance protein :%IPR002182:NB-ARC|	|GO:0043531:ADP binding|		|GO:0006952:defense response|
XLOC_008766	10[.]37711815-37712719	-	1.89696	5.61359	-1.56524	0.0248	0.996326	Down
XLOC_008774	10[.]42174528-42175902	-	7.66203	2.98488	1.36005	0.0221	0.996326	Up	rcu:RCOM_0939110	50	325	5e-87	Flavonol 4'-sulfotransferase, putative (EC:2.8.2.4)		|%IPR000863:Sulfotransferase domain :%IPR027417:P-loop containing nucleoside triphosphate hydrolase|	|GO:0008146:sulfotransferase activity|
XLOC_008832	10[.]125683760-125684274	-	0	1.22275	-inf	0.0011	0.36803	Down
XLOC_008870	10[.]148861744-148862568	-	4.58057	12.1007	-1.40149	0.02225	0.996326	Down
XLOC_008897	10[.]162876893-162877748	-	54.7709	223.517	-2.02891	0.00015	0.148885	Down
XLOC_008955	10[.]190998553-190999605	-	185.432	857.264	-2.20885	5e-05	0.0875794	Down
XLOC_008956	10[.]191023297-191023436	-	147.788	537.54	-1.86284	0.03475	0.996326	Down
XLOC_008958	10[.]191052595-191053465	-	49.0681	212.027	-2.11139	0.0001	0.13535	Down
XLOC_008972	10[.]195496846-195497836	-	7.56637	21.8002	-1.52667	0.0081	0.770421	Down
XLOC_008984	10[.]197442059-197442800	-	10.2653	24.224	-1.23866	0.02895	0.996326	Down	rcu:RCOM_0437400	62	107	6e-22	syntaxin, plant, putative
XLOC_008985	10[.]198048825-198050232	-	0.000122767	1.42143	-13.4991	0.0474	0.996326	Down
XLOC_009006	10[.]200816533-200817241	-	16.6662	44.4806	-1.41625	0.01295	0.892621	Down
XLOC_009021	10[.]201376493-201377013	-	6.60324	16.7118	-1.33962	0.0332	0.996326	Down
XLOC_009022	10[.]201500228-201501035	-	33.5986	100.93	-1.58688	0.00195	0.500562	Down
XLOC_009023	10[.]201505939-201506652	-	2.22691	6.09202	-1.45188	0.03995	0.996326	Down	pop:POPTR_1075721	78	91.7	2e-25	hypothetical protein
XLOC_009036	10[.]202731162-202732206	-	0.982643	0.000300547	11.6749	0.03805	0.996326	Up	pop:POPTR_808453	64	335	4e-90	hypothetical protein; K13495 cis-zeatin O-glucosyltransferase [EC:2.4.1.215]	|Metabolism; Metabolism of Terpenoids and Polyketides; Zeatin biosynthesis [PATH:ko00908-Map:ko00908];|	|%IPR002213:UDP-glucuronosyl/UDP-glucosyltransferase :|	|GO:0016758:transferase activity, transferring hexosyl groups|		|GO:0008152:metabolic process|
XLOC_009039	10[.]203016805-203019025	-	2.34054	0.789538	1.56776	0.0207	0.996326	Up	vvi:100241062	38	415	1e-114	hypothetical protein LOC100241062		|%IPR000767:Disease resistance protein :%IPR002182:NB-ARC|	|GO:0043531:ADP binding|		|GO:0006952:defense response|
XLOC_009041	10[.]203176786-203177502	-	0.553634	0	inf	0.00555	0.671798	Up	vvi:100265003	43	111	4e-23	hypothetical protein LOC100265003
XLOC_009045	10[.]203762045-203763955	-	2.16124	0.542849	1.99324	0.0133	0.896005	Up	vvi:100265003	40	431	1e-118	hypothetical protein LOC100265003		|%IPR000767:Disease resistance protein :%IPR002182:NB-ARC|	|GO:0000166:nucleotide binding|GO:0017111:nucleoside-triphosphatase activity|GO:0043531:ADP binding|		|GO:0006952:defense response|
XLOC_009084	11[+]2026201-2032053	Capana11g000062,	6.09584	13.3876	-1.135	0.0472	0.996326	Down	vvi:100243331	64	343	1e-92	hypothetical protein LOC100243331; K01674 carbonic anhydrase [EC:4.2.1.1]	|Metabolism; Energy Metabolism; Nitrogen metabolism [PATH:ko00910-Map:ko00910];|	|%IPR001148:Alpha carbonic anhydrase :%IPR018338:Carbonic anhydrase, alpha-class, conserved site|	|GO:0004089:carbonate dehydratase activity|GO:0008270:zinc ion binding|		|GO:0006730:one-carbon metabolic process|
XLOC_009087	11[+]2060974-2068233	Capana11g000066,	9.50703	3.99825	1.24962	0.02235	0.996326	Up	vvi:100233041	70	1007	0	zinc finger RING-type protein-like		|%IPR001841:Zinc finger, RING-type :%IPR002035:von Willebrand factor, type A|	|GO:0005515:protein binding|GO:0008270:zinc ion binding|
XLOC_009129	11[+]3917660-3918505	-	1.7134	5.86054	-1.77417	0.03515	0.996326	Down	pop:POPTR_733487	94	70.5	9e-11	hypothetical protein
XLOC_009179	11[+]8506660-8507425	Capana11g000320,	106.913	226.258	-1.08153	0.02795	0.996326	Down	rcu:RCOM_1281780	70	263	9e-69	hypothetical protein
XLOC_009187	11[+]9160493-9165485	Capana11g000344,	5.42976	2.38934	1.18427	0.0387	0.996326	Up	pop:POPTR_1112217	50	567	1e-159	hypothetical protein
XLOC_009196	11[+]9875271-9882551	Capana11g000365,	7.61862	3.12251	1.28682	0.01785	0.982476	Up	vvi:100252988	52	882	0	hypothetical protein LOC100252988		|%IPR011598:Myc-type, basic helix-loop-helix (bHLH) domain :%IPR025610:Transcription factor MYC/MYB N-terminal|	|GO:0046983:protein dimerization activity|
XLOC_009197	11[+]10002482-10008043	Capana11g000369,	0.433132	2.23089	-2.36474	0.01985	0.996326	Down	pop:POPTR_204165	52	427	1e-118	hypothetical protein		|%IPR020966:Aluminum-activated malate transporter :|			|GO:0015743:malate transport|
XLOC_009225	11[+]13957794-13960211	Capana11g000464,	36.7944	76.6971	-1.05969	0.0335	0.996326	Down	pop:POPTR_782441	31	130	2e-28	hypothetical protein
XLOC_009230	11[+]14411608-14413048	-	8.5717	31.7735	-1.89017	0.0115	0.88802	Down
XLOC_009251	11[+]20882374-20887424	Capana11g000602,	3.62365	20.863	-2.52543	5e-05	0.0875794	Down	vvi:100263449	56	333	1e-146	hypothetical protein LOC100263449		|%IPR001128:Cytochrome P450 :%IPR002401:Cytochrome P450, E-class, group I|	|GO:0005506:iron ion binding|GO:0009055:electron carrier activity|GO:0016705:oxidoreductase activity, acting on paired donors, with incorporation or reduction of molecular oxygen|GO:0020037:heme binding|		|GO:0055114:oxidation-reduction process|
XLOC_009283	11[+]35254732-35261062	Capana11g000745,	0.9425	5.87528	-2.64009	0.0127	0.892621	Down	vvi:100263857	58	180	1e-43	hypothetical protein LOC100263857
XLOC_009347	11[+]87907046-87944351	Capana11g001000,	1.96827	0.752395	1.38736	0.03165	0.996326	Up	vvi:100258902	44	538	1e-150	hypothetical protein LOC100258902; K14311 nuclear pore complex protein Nup188	|Genetic Information Processing; Translation; RNA transport [PATH:ko03013-Map:ko03013];|
XLOC_009383	11[+]126500946-126536750	Capana11g001116,	7.58587	3.66354	1.05008	0.04665	0.996326	Up	vvi:100254600	56	1861	0	hypothetical protein LOC100254600		|%IPR000330:SNF2-related :%IPR001650:Helicase, C-terminal|	|GO:0003676:nucleic acid binding|GO:0003677:DNA binding|GO:0004386:helicase activity|GO:0005524:ATP binding|
XLOC_009430	11[+]155832856-155838619	Capana11g001305,	8.19388	17.5365	-1.09774	0.0332	0.996326	Down	vvi:100258559	56	757	0	hypothetical protein LOC100258559		|%IPR004873:BURP domain :|
XLOC_009433	11[+]159401470-159404535	Capana11g001329,	7.74122	23.4043	-1.59614	0.0037	0.639234	Down	vvi:100245071	62	421	1e-116	hypothetical protein LOC100245071; K08235 xyloglucan:xyloglucosyl transferase [EC:2.4.1.207]	|Unclassified; Metabolism; Others|	|%IPR000757:Glycoside hydrolase, family 16 :%IPR008985:Concanavalin A-like lectin/glucanases superfamily|	|GO:0004553:hydrolase activity, hydrolyzing O-glycosyl compounds|GO:0016762:xyloglucan:xyloglucosyl transferase activity|	|GO:0005618:cell wall|GO:0048046:apoplast|	|GO:0005975:carbohydrate metabolic process|GO:0006073:cellular glucan metabolic process|
XLOC_009452	11[+]163995792-164007757	Capana11g001382,	5.28034	1.93391	1.44911	0.0217	0.996326	Up	vvi:100257084	52	365	7e-99	hypothetical protein LOC100257084		|%IPR000620:Drug/metabolite transporter :|		|GO:0016020:membrane|
XLOC_009464	11[+]167132111-167138435	Capana11g001403,	9.73529	30.5527	-1.65	0.0024	0.558319	Down	vvi:100262106	71	619	1e-175	hypothetical protein LOC100262106; K14664 IAA-amino acid hydrolase [EC:3.5.1.-]	|Metabolism; Enzyme Families; Peptidases [BR:ko01002];|	|%IPR002933:Peptidase M20 :%IPR011650:Peptidase M20, dimerisation domain|	|GO:0016787:hydrolase activity|		|GO:0008152:metabolic process|
XLOC_009481	11[+]175719259-175800635	Capana11g001487,	0.876536	3.38368	-1.94871	0.014	0.91398	Down	vvi:100249169	85	728	0	hypothetical protein LOC100249169; K00654 serine palmitoyltransferase [EC:2.3.1.50]	|Metabolism; Amino Acid Metabolism; Amino acid related enzymes [BR:ko01007];|Metabolism; Lipid Metabolism; Sphingolipid metabolism [PATH:ko00600-Map:ko00600];|	|%IPR001917:Aminotransferase, class-II, pyridoxal-phosphate binding site :%IPR004839:Aminotransferase, class I/classII|	|GO:0003824:catalytic activity|GO:0016740:transferase activity|GO:0030170:pyridoxal phosphate binding|		|GO:0008152:metabolic process|GO:0009058:biosynthetic process|
XLOC_009514	11[+]186490517-186507711	Capana11g001631,	1.4991	4.9997	-1.73775	0.0152	0.930531	Down	rcu:RCOM_0697770	55	275	7e-72	WRKY transcription factor, putative		|%IPR003657:DNA-binding WRKY :|	|GO:0003700:sequence-specific DNA binding transcription factor activity|GO:0043565:sequence-specific DNA binding|		|GO:0006355:regulation of transcription, DNA-dependent|
XLOC_009531	11[+]190893527-190898327	Capana11g001694,	51.7613	109.307	-1.07843	0.0298	0.996326	Down	ath:AT1G69640	77	429	1e-118	SBH1; SBH1 (SPHINGOID BASE HYDROXYLASE 1); catalytic/ sphingosine hydroxylase		|%IPR006694:Fatty acid hydroxylase :|	|GO:0005506:iron ion binding|GO:0016491:oxidoreductase activity|		|GO:0006633:fatty acid biosynthetic process|GO:0055114:oxidation-reduction process|
XLOC_009545	11[+]196877539-196879328	Capana11g001813,	2.1816	6.75993	-1.63162	0.01175	0.88802	Down	vvi:100253321	62	365	3e-99	hypothetical protein LOC100253321		|%IPR003441:NAC domain :|	|GO:0003677:DNA binding|		|GO:0006355:regulation of transcription, DNA-dependent|
XLOC_009551	11[+]198378352-198387457	Capana11g001845,	37.2718	82.2795	-1.14245	0.02525	0.996326	Down	rcu:RCOM_0836480	66	310	8e-83	ribonuclease t2, putative (EC:3.1.27.1); K01166 ribonuclease T2 [EC:3.1.27.1]	|Unclassified; Genetic Information Processing; Translation proteins|	|%IPR001568:Ribonuclease T2-like :%IPR018188:Ribonuclease T2, active site|	|GO:0003723:RNA binding|GO:0033897:ribonuclease T2 activity|
XLOC_009599	11[+]205166942-205179977	Capana11g002010,	4.49959	1.58915	1.50154	0.01815	0.98803	Up	vvi:100254292	54	986	0	hypothetical protein LOC100254292		|%IPR005343:Nucleolar complex protein 2 :%IPR007276:Nucleolar protein 14|		|GO:0032040:small-subunit processome|
XLOC_009605	11[+]205482956-205483709	-	0	2.79678	-inf	0.0011	0.36803	Down
XLOC_009652	11[+]215254116-215317817	-	5.92555	14.947	-1.33483	0.02715	0.996326	Down
XLOC_009654	11[+]215438762-215441619	-	3.59329	10.8163	-1.58983	0.0306	0.996326	Down
XLOC_009682	11[+]216722516-216724151	Capana11g002264,	8.3613	18.3089	-1.13074	0.03265	0.996326	Down	vvi:100261259	59	426	1e-117	hypothetical protein LOC100261259		|%IPR013094:Alpha/beta hydrolase fold-3 :|	|GO:0016787:hydrolase activity|		|GO:0008152:metabolic process|
XLOC_009698	11[+]218900658-218905589	Capana11g002326,	0.862485	2.70222	-1.64758	0.0242	0.996326	Down	pop:POPTR_566591	62	534	1e-150	hypothetical protein
XLOC_009716	11[+]220095182-220095816	Capana11g002392,	57.4404	115.917	-1.01296	0.04245	0.996326	Down	pop:POPTR_564591	55	160	8e-38	hypothetical protein
XLOC_009728	11[-]1359597-1361660	Capana11g000043,	1.11172	0.336054	1.72603	0.0485	0.996326	Up	vvi:100241340	82	923	0	hypothetical protein LOC100241340		|%IPR011701:Major facilitator superfamily :%IPR016196:Major facilitator superfamily domain, general substrate transporter|		|GO:0016021:integral to membrane|	|GO:0055085:transmembrane transport|
XLOC_009780	11[-]5287665-5295304	Capana11g000199,	5.99668	12.7394	-1.08706	0.03945	0.996326	Down	vvi:100267109	75	715	0	hypothetical protein LOC100267109; K09646 serine carboxypeptidase 1 [EC:3.4.16.-]	|Metabolism; Enzyme Families; Peptidases [BR:ko01002];|	|%IPR001563:Peptidase S10, serine carboxypeptidase :%IPR018202:Peptidase S10, serine carboxypeptidase, active site|	|GO:0004185:serine-type carboxypeptidase activity|		|GO:0006508:proteolysis|
XLOC_009793	11[-]5989590-6019537	Capana11g000236,	1.17246	0.314985	1.89619	0.00715	0.739361	Up	pop:POPTR_594813	85	1459	0	hypothetical protein; K02324 DNA polymerase epsilon subunit 1 [EC:2.7.7.7]	|Genetic Information Processing; Replication and Repair; Base excision repair [PATH:ko03410-Map:ko03410];|Genetic Information Processing; Replication and Repair; DNA repair and recombination proteins [BR:ko03400];|Genetic Information Processing; Replication and Repair; DNA replication [PATH:ko03030-Map:ko03030];|Genetic Information Processing; Replication and Repair; DNA replication proteins [BR:…	|%IPR006133:DNA-directed DNA polymerase, family B, exonuclease domain :%IPR006134:DNA-directed DNA polymerase, family B, multifunctional domain|	|GO:0000166:nucleotide binding|GO:0003676:nucleic acid binding|GO:0003677:DNA binding|GO:0003887:DNA-directed DNA polymerase activity|		|GO:0006139:nucleobase-containing compound metabolic process|GO:0006260:DNA replication|
XLOC_009802	11[-]6591837-6593311	Capana11g000252,	217.787	491.317	-1.17374	0.0156	0.936535	Down	rcu:RCOM_1180730	59	124	5e-27	hypothetical protein		|%IPR011008:Dimeric alpha-beta barrel :%IPR013097:Stress responsive alpha-beta barrel|
XLOC_009803	11[-]6595417-6597742	Capana11g000253,	12.0328	31.0892	-1.36944	0.01615	0.941093	Down	rcu:RCOM_1180730	65	145	4e-33	hypothetical protein		|%IPR011008:Dimeric alpha-beta barrel :%IPR013097:Stress responsive alpha-beta barrel|
XLOC_009823	11[-]8600513-8603936	Capana11g000328,	1.48253	6.44661	-2.12048	0.00575	0.679436	Down	vvi:100263879	70	263	1e-68	hypothetical protein LOC100263879		|%IPR003441:NAC domain :|	|GO:0003677:DNA binding|		|GO:0006355:regulation of transcription, DNA-dependent|
XLOC_009833	11[-]9543157-9543604	Capana11g000348,	55.9933	196.507	-1.81126	0.0012	0.388396	Down	vvi:100267369	39	117	3e-25	hypothetical protein LOC100267369
XLOC_009837	11[-]9663188-9671830	Capana11g000362,	3.01179	8.70794	-1.53171	0.0102	0.832124	Down	vvi:100261566	55	468	1e-130	hypothetical protein LOC100261566		|%IPR003613:U box domain :%IPR011989:Armadillo-like helical|	|GO:0004842:ubiquitin-protein ligase activity|GO:0005488:binding|	|GO:0000151:ubiquitin ligase complex|	|GO:0016567:protein ubiquitination|
XLOC_009841	11[-]9766592-9772576	Capana11g000364,	3.10392	0.902075	1.78277	0.0065	0.724908	Up	vvi:100259827	52	343	1e-154	hypothetical protein LOC100259827		|%IPR001356:Homeobox domain :%IPR006563:POX domain|	|GO:0003677:DNA binding|GO:0003700:sequence-specific DNA binding transcription factor activity|GO:0043565:sequence-specific DNA binding|		|GO:0006355:regulation of transcription, DNA-dependent|
XLOC_009882	11[-]18166276-18169553	Capana11g000556,	3.19762	1.2344	1.37318	0.04655	0.996326	Up	vvi:100244569	42	261	6e-68	hypothetical protein LOC100244569		|%IPR005123:Oxoglutarate/iron-dependent dioxygenase :%IPR026992:Non-haem dioxygenase N-terminal domain|	|GO:0016491:oxidoreductase activity|GO:0016706:oxidoreductase activity, acting on paired donors, with incorporation or reduction of molecular oxygen, 2-oxoglutarate as one donor, and incorporation of one atom each of oxygen into both donors|		|GO:0055114:oxidation-reduction process|
XLOC_009894	11[-]21000589-21003221	Capana11g000605,	1.20469	3.39041	-1.4928	0.04485	0.996326	Down	rcu:RCOM_1399160	71	274	8e-72	LOB domain-containing protein, putative		|%IPR004883:Lateral organ boundaries, LOB :|
XLOC_009935	11[-]35861074-35862920	Capana11g000752,	103.603	244.146	-1.23667	0.0103	0.837987	Down	pop:POPTR_549212	64	326	2e-87	aquaporin, MIP family, TIP subfamily		|%IPR000425:Major intrinsic protein :%IPR022357:Major intrinsic protein, conserved site|	|GO:0005215:transporter activity|	|GO:0016020:membrane|	|GO:0006810:transport|
XLOC_010006	11[-]96103847-96104628	Capana11g001021,	3.6463	0.00705343	9.01389	0.0299	0.996326	Up
XLOC_010072	11[-]153085636-153089699	Capana11g001285,	1.68531	0.511743	1.71952	0.03175	0.996326	Up	vvi:100241353	72	773	0	hypothetical protein LOC100241353		|%IPR000743:Glycoside hydrolase, family 28 :%IPR006626:Parallel beta-helix repeat|	|GO:0004650:polygalacturonase activity|		|GO:0005975:carbohydrate metabolic process|
XLOC_010105	11[-]170483411-170484503	Capana11g001436,	39.9192	97.6934	-1.29118	0.01	0.83176	Down	rcu:RCOM_0699890	45	167	2e-39	hypothetical protein		|%IPR007087:Zinc finger, C2H2 :|	|GO:0046872:metal ion binding|
XLOC_010136	11[-]180926077-180932039	Capana11g001561,	3.71692	16.7656	-2.17332	0.0294	0.996326	Down	vvi:100250071	66	820	0	hypothetical protein LOC100250071		|%IPR000109:Proton-dependent oligopeptide transporter family :%IPR016196:Major facilitator superfamily domain, general substrate transporter|	|GO:0005215:transporter activity|	|GO:0016020:membrane|	|GO:0006810:transport|GO:0006857:oligopeptide transport|
XLOC_010206	11[-]204222480-204225503	Capana11g001970,	6.15102	20.2643	-1.72004	0.0014	0.443487	Down	vvi:100260081	51	382	1e-104	hypothetical protein LOC100260081
XLOC_010249	11[-]213869007-213874481	Capana11g002155,	37.5609	15.7674	1.25229	0.01355	0.900621	Up	vvi:100249555	78	980	0	hypothetical protein LOC100249555		|%IPR000719:Protein kinase domain :%IPR002290:Serine/threonine- / dual specificity protein kinase, catalytic domain|	|GO:0004672:protein kinase activity|GO:0004674:protein serine/threonine kinase activity|GO:0004713:protein tyrosine kinase activity|GO:0005524:ATP binding|GO:0016772:transferase activity, transferring phosphorus-containing groups|		|GO:0006468:protein phosphorylation|
XLOC_010252	11[-]213977647-213979894	Capana11g002160,	2.70932	7.77105	-1.52018	0.01205	0.891836	Down	vvi:100261208	58	468	1e-130	hypothetical protein LOC100261208
XLOC_010260	11[-]214954841-214963652	Capana11g002194,	0.598836	3.19954	-2.41763	0.00345	0.639234	Down	vvi:100245828	79	1036	0	hypothetical protein LOC100245828		|%IPR004331:SPX, N-terminal :%IPR004342:EXS, C-terminal|		|GO:0016021:integral to membrane|
XLOC_010273	11[-]216443606-216445093	Capana11g002253,	36.4014	155.617	-2.09593	0.00015	0.148885	Down	rcu:RCOM_0811890	39	82	2e-14	hypothetical protein
XLOC_010274	11[-]216457940-216460322	Capana11g002254,	1.82455	5.26881	-1.52994	0.02845	0.996326	Down	pop:POPTR_655501	31	105	3e-21	hypothetical protein		|%IPR011598:Myc-type, basic helix-loop-helix (bHLH) domain :|	|GO:0046983:protein dimerization activity|
XLOC_010287	11[-]218322335-218323948	Capana11g002301,	82.4964	33.6109	1.2954	0.01005	0.832124	Up	vvi:100254184	52	243	2e-62	hypothetical protein LOC100254184		|%IPR004883:Lateral organ boundaries, LOB :|
XLOC_010289	11[-]218380850-218381867	Capana11g002303,	6.93242	23.0243	-1.73172	0.0037	0.639234	Down	rcu:RCOM_0030010	39	86.3	3e-15	hypothetical protein
XLOC_010299	11[-]218850656-218861353	Capana11g002322,	6.34501	3.01729	1.07237	0.04545	0.996326	Up	vvi:100255880	72	1818	0	hypothetical protein LOC100255880		|%IPR001841:Zinc finger, RING-type :%IPR004039:Rubredoxin-type fold|	|GO:0005515:protein binding|GO:0008270:zinc ion binding|
XLOC_010302	11[-]219112050-219116635	Capana11g002339,	3.02132	1.24447	1.27965	0.0479	0.996326	Up	rcu:RCOM_0577350	73	633	0	GABA-specific permease, putative		|%IPR002293:Amino acid/polyamine transporter I :%IPR004840:Amino acid permease, conserved site|	|GO:0015171:amino acid transmembrane transporter activity|	|GO:0016020:membrane|GO:0016021:integral to membrane|	|GO:0003333:amino acid transmembrane transport|GO:0006865:amino acid transport|GO:0055085:transmembrane transport|
XLOC_010304	11[-]219147865-219160797	Capana11g002341,	6.5674	3.09202	1.08677	0.04975	0.996326	Up	vvi:100261635	33	600	1e-169	hypothetical protein LOC100261635
XLOC_010324	11[.]4072640-4075592	-	4.27617	1.91119	1.16184	0.0424	0.996326	Up	vvi:100258849	67	675	0	hypothetical protein LOC100258849		|%IPR001584:Integrase, catalytic core :%IPR012337:Ribonuclease H-like domain|	|GO:0003676:nucleic acid binding|		|GO:0015074:DNA integration|
XLOC_010365	11[.]12804725-12807546	-	17.2622	36.3147	-1.07294	0.02865	0.996326	Down
XLOC_010373	11[.]14790595-14791003	-	1.28597	0	inf	0.00555	0.671798	Up
XLOC_010406	11[.]23884895-23886143	-	64.4002	130.659	-1.02067	0.0352	0.996326	Down
XLOC_010407	11[.]23910717-23911478	-	2.50417	7.7358	-1.62722	0.01795	0.984341	Down
XLOC_010412	11[.]31424722-31425093	-	2.44232	0.000917096	11.3789	0.04595	0.996326	Up
XLOC_010414	11[.]32988810-32989193	-	0	1.85703	-inf	0.00155	0.461544	Down
XLOC_010520	11[.]172735447-172736253	-	186.121	383.652	-1.04356	0.0285	0.996326	Down	rcu:RCOM_1512610	51	81.3	7e-14	hypothetical protein
XLOC_010535	11[.]180100359-180101326	-	71.4378	199.065	-1.47848	0.00285	0.614281	Down
XLOC_010544	11[.]183794096-183795133	-	0.833404	2.83007	-1.76375	0.03305	0.996326	Down	vvi:100257893	40	83.6	4e-33	hypothetical protein LOC100257893
XLOC_010608	11[.]210308470-210310499	-	1.06671	0.290923	1.87446	0.045	0.996326	Up
XLOC_010615	11[.]212471784-212473117	-	2.7651	6.38725	-1.20786	0.04555	0.996326	Down
XLOC_010635	11[.]214474932-214475731	-	1.53811	9.8915	-2.68503	0.00125	0.400228	Down	vvi:100252649	38	116	2e-24	hypothetical protein LOC100252649		|%IPR001841:Zinc finger, RING-type :%IPR011016:Zinc finger, RING-CH-type|	|GO:0005515:protein binding|GO:0008270:zinc ion binding|
XLOC_010636	11[.]214483705-214484560	-	0.844056	3.78354	-2.16433	0.02125	0.996326	Down	vvi:100252649	40	125	5e-27	hypothetical protein LOC100252649
XLOC_010676	12[+]364051-365141	-	3.43133	15.2518	-2.15214	0.0008	0.340309	Down
XLOC_010681	12[+]556600-557862	-	0.723863	5.94288	-3.03737	0.002	0.509009	Down	zma:100282744	68	105	2e-56	omega-6 fatty acid desaturase, endoplasmic reticulum isozyme 2		|%IPR005804:Fatty acid desaturase, type 1 :|			|GO:0006629:lipid metabolic process|
XLOC_010683	12[+]600732-601343	Capana12g000033,	8.79652	23.002	-1.38676	0.0222	0.996326	Down	rcu:RCOM_0503360	70	286	4e-76	omega-6 desaturase, endoplasmic reticulum (EC:1.14.99.33); K10256 omega-6 fatty acid desaturase (delta-12 desaturase) [EC:1.14.19.-]	|Metabolism; Lipid Metabolism; Biosynthesis of unsaturated fatty acids [PATH:ko01040-Map:ko01040];|Metabolism; Lipid Metabolism; Lipid biosynthesis proteins [BR:ko01004];|	|%IPR005804:Fatty acid desaturase, type 1 :|			|GO:0006629:lipid metabolic process|
XLOC_010691	12[+]1560671-1562719	Capana12g000075,	3.10896	0.32878	3.24124	0.0111	0.874404	Up	pop:POPTR_664707	37	166	3e-39	hypothetical protein
XLOC_010707	12[+]2010924-2019069	Capana12g000117,	4.7138	12.1697	-1.36834	0.016	0.941093	Down	vvi:100244484	69	413	1e-113	hypothetical protein LOC100244484
XLOC_010723	12[+]2807009-2817626	Capana12g000167,Capana12g000168,	1.28183	0.15982	3.00369	0.0041	0.645956	Up	vvi:100258583	28	371	1e-100	hypothetical protein LOC100258583; K14405 pre-mRNA 3'-end-processing factor FIP1	|Genetic Information Processing; Translation; mRNA surveillance pathway [PATH:ko03015-Map:ko03015];|	|%IPR007854:Pre-mRNA polyadenylation factor Fip1 :|
XLOC_010736	12[+]3461433-3471754	Capana12g000209,	2.57345	5.9498	-1.20914	0.03775	0.996326	Down	rcu:RCOM_1003780	75	645	0	CBL-interacting serine/threonine-protein kinase, putative (EC:2.7.11.17)		|%IPR000719:Protein kinase domain :%IPR001772:Kinase associated domain 1 (KA1)|	|GO:0004672:protein kinase activity|GO:0004674:protein serine/threonine kinase activity|GO:0004713:protein tyrosine kinase activity|GO:0005524:ATP binding|GO:0016772:transferase activity, transferring phosphorus-containing groups|		|GO:0006468:protein phosphorylation|GO:0007165:signal transduction|
XLOC_010801	12[+]8218955-8219783	Capana12g000417,	23.7527	7.39772	1.68294	0.0053	0.671798	Up	vvi:100266820	47	119	2e-25	similar to ATGDU3 (ARABIDOPSIS THALIANA GLUTAMINE DUMPER 3)
XLOC_010848	12[+]12696336-12697405	Capana12g000574,	1.74199	4.70951	-1.43484	0.0353	0.996326	Down	rcu:RCOM_1600470	54	233	2e-59	hypothetical protein
XLOC_010868	12[+]17851267-17853381	-	17.831	50.6236	-1.50542	0.0089	0.795842	Down	vvi:100258942	57	124	3e-27	hypothetical protein LOC100258942		|%IPR001005:SANT/Myb domain :%IPR009057:Homeodomain-like|	|GO:0003677:DNA binding|GO:0003682:chromatin binding|
XLOC_010921	12[+]34618976-34620015	Capana12g000925,	230.294	499.487	-1.11697	0.02135	0.996326	Down	vvi:100243780	41	94	3e-18	hypothetical protein LOC100243780		|%IPR003245:Plastocyanin-like :%IPR008972:Cupredoxin|	|GO:0005507:copper ion binding|GO:0009055:electron carrier activity|
XLOC_010928	12[+]38430623-38433952	Capana12g000976,	1.08265	5.68819	-2.3934	0.0011	0.36803	Down	pop:POPTR_1108887	61	518	1e-145	hypothetical protein		|%IPR000719:Protein kinase domain :%IPR001245:Serine-threonine/tyrosine-protein kinase catalytic domain|	|GO:0004672:protein kinase activity|GO:0004674:protein serine/threonine kinase activity|GO:0004713:protein tyrosine kinase activity|GO:0005524:ATP binding|GO:0016772:transferase activity, transferring phosphorus-containing groups|		|GO:0006468:protein phosphorylation|
XLOC_010940	12[+]41165191-41175033	-	1.83027	6.41738	-1.80993	0.0145	0.922578	Down	rcu:RCOM_1512730	79	51.2	7e-11	mannose-1-phosphate guanyltransferase, putative (EC:2.7.7.13); K00966 mannose-1-phosphate guanylyltransferase [EC:2.7.7.13]	|Metabolism; Carbohydrate Metabolism; Amino sugar and nucleotide sugar metabolism [PATH:ko00520-Map:ko00520];|Metabolism; Carbohydrate Metabolism; Fructose and mannose metabolism [PATH:ko00051-Map:ko00051];|
XLOC_010983	12[+]64684899-64685881	Capana12g001246,	15.9877	6.89151	1.21407	0.0355	0.996326	Up	vvi:100248099	55	189	3e-46	hypothetical protein LOC100248099
XLOC_011025	12[+]98682964-98691873	Capana12g001442,	7.77785	3.8739	1.00558	0.0487	0.996326	Up	vvi:100240985	48	1380	0	hypothetical protein LOC100240985		|%IPR001005:SANT/Myb domain :%IPR009057:Homeodomain-like|	|GO:0003677:DNA binding|GO:0003682:chromatin binding|
XLOC_011052	12[+]115508160-115566874	Capana12g001532,	15.7241	7.70678	1.02878	0.03505	0.996326	Up	vvi:100248532	84	2090	0	hypothetical protein LOC100248532		|%IPR000357:HEAT :%IPR011989:Armadillo-like helical|	|GO:0005488:binding|GO:0005515:protein binding|
XLOC_011100	12[+]158936979-158945232	Capana12g001760,	232.3	480.821	-1.04951	0.0229	0.996326	Down	vvi:100245593	70	145	3e-33	hypothetical protein LOC100245593
XLOC_011118	12[+]170920255-170933933	Capana12g001826,	5.22826	15.6578	-1.58248	0.0177	0.982476	Down	rcu:RCOM_0766690	51	155	1e-36	WRKY transcription factor, putative		|%IPR003657:DNA-binding WRKY :|	|GO:0003700:sequence-specific DNA binding transcription factor activity|GO:0043565:sequence-specific DNA binding|		|GO:0006355:regulation of transcription, DNA-dependent|
XLOC_011161	12[+]188033809-188054717	Capana12g001994,	1.48578	0.49676	1.58059	0.0129	0.892621	Up	vvi:100264422	58	1498	0	hypothetical protein LOC100264422		|%IPR003590:Leucine-rich repeat, ribonuclease inhibitor subtype :%IPR006553:Leucine-rich repeat, cysteine-containing subtype|	|GO:0005515:protein binding|		|GO:0000086:G2/M transition of mitotic cell cycle|GO:0009934:regulation of meristem structural organization|
XLOC_011193	12[+]197875148-197876329	Capana12g002103,	1.13812	4.06839	-1.8378	0.0124	0.891871	Down	rcu:RCOM_0608740	59	213	2e-53	Ethylene-responsive transcription factor 1B, putative		|%IPR001471:AP2/ERF domain :%IPR016177:DNA-binding domain|	|GO:0003677:DNA binding|GO:0003700:sequence-specific DNA binding transcription factor activity|		|GO:0006355:regulation of transcription, DNA-dependent|
XLOC_011214	12[+]201131128-201135505	Capana12g002150,	3.8287	11.4697	-1.5829	0.00635	0.710842	Down	rcu:RCOM_0739740	76	520	1e-145	phospholipase C, putative		|%IPR000909:Phospholipase C, phosphatidylinositol-specific , X domain :%IPR017946:PLC-like phosphodiesterase, TIM beta/alpha-barrel domain|	|GO:0008081:phosphoric diester hydrolase activity|		|GO:0006629:lipid metabolic process|
XLOC_011234	12[+]207491181-207519049	Capana12g002229,	6.427	2.92329	1.13655	0.04095	0.996326	Up	vvi:100256091	49	790	0	hypothetical protein LOC100256091		|%IPR011989:Armadillo-like helical :%IPR016024:Armadillo-type fold|	|GO:0005488:binding|
XLOC_011247	12[+]209223822-209225382	-	0.367021	3.40954	-3.21564	0.02895	0.996326	Down	vvi:100243056	60	79.3	4e-13	hypothetical protein LOC100243056
XLOC_011249	12[+]209766806-209772063	Capana12g002279,	1.63521	0.558777	1.54913	0.0221	0.996326	Up	vvi:100267656	33	384	1e-104	hypothetical protein LOC100267656
XLOC_011277	12[+]213686271-213687891	Capana12g002380,	11.5513	3.37125	1.77671	0.0068	0.739361	Up	ath:AT1G05310	66	338	3e-91	pectinesterase family protein (EC:3.1.1.11)		|%IPR000070:Pectinesterase, catalytic :%IPR011050:Pectin lyase fold/virulence factor|	|GO:0030599:pectinesterase activity|	|GO:0005618:cell wall|	|GO:0042545:cell wall modification|
XLOC_011286	12[+]214936774-214940153	Capana12g002404,	7.2754	27.9751	-1.94305	0.0005	0.275713	Down	vvi:100252986	69	521	1e-146	hypothetical protein LOC100252986		|%IPR002283:Isopenicillin N synthase :%IPR005123:Oxoglutarate/iron-dependent dioxygenase|	|GO:0005506:iron ion binding|GO:0016491:oxidoreductase activity|GO:0016706:oxidoreductase activity, acting on paired donors, with incorporation or reduction of molecular oxygen, 2-oxoglutarate as one donor, and incorporation of one atom each of oxygen into both donors|		|GO:0055114:oxidation-reduction process|
XLOC_011295	12[+]217625137-217627825	Capana12g002446,	14.9804	3.07576	2.28407	0.00025	0.212693	Up	vvi:100267145	48	312	1e-136	terpene synthase		|%IPR001906:Terpene synthase, N-terminal domain :%IPR005630:Terpene synthase, metal-binding domain|	|GO:0000287:magnesium ion binding|GO:0010333:terpene synthase activity|GO:0016829:lyase activity|		|GO:0008152:metabolic process|
XLOC_011296	12[+]217859561-217867136	Capana12g002450,	6.94424	29.8735	-2.10498	0.00325	0.639234	Down	vvi:100265509	41	93.6	4e-18	hypothetical protein LOC100265509		|%IPR001906:Terpene synthase, N-terminal domain :%IPR008930:Terpenoid cyclases/protein prenyltransferase alpha-alpha toroid|	|GO:0010333:terpene synthase activity|GO:0016829:lyase activity|		|GO:0008152:metabolic process|
XLOC_011379	12[+]226697594-226701443	Capana12g002734,	0.48534	0	inf	0.00555	0.671798	Up	vvi:100259775	38	353	2e-95	hypothetical protein LOC100259775
XLOC_011392	12[+]227492208-227501801	Capana12g002766,	31.5075	9.36539	1.75028	0.001	0.36803	Up	pop:POPTR_799359	75	1283	0	hypothetical protein		|%IPR000595:Cyclic nucleotide-binding domain :%IPR002110:Ankyrin repeat|	|GO:0005216:ion channel activity|GO:0005249:voltage-gated potassium channel activity|GO:0005515:protein binding|	|GO:0016020:membrane|	|GO:0006811:ion transport|GO:0006813:potassium ion transport|GO:0055085:transmembrane transport|
XLOC_011438	12[+]229609466-229633509	Capana12g002891,	5.78503	2.34335	1.30375	0.01205	0.891836	Up	rcu:RCOM_1065770	58	1797	0	androgen induced inhibitor of proliferation (as3) / pds5, putative; K11267 sister chromatid cohesion protein PDS5	|Genetic Information Processing; Replication and Repair; Chromosome [BR:ko03036];|	|%IPR011989:Armadillo-like helical :%IPR016024:Armadillo-type fold|	|GO:0005488:binding|
XLOC_011449	12[+]229923144-229929404	Capana12g002925,	3.79058	1.66059	1.19072	0.0465	0.996326	Up	vvi:100266296	53	721	0	hypothetical protein LOC100266296		|%IPR004022:DDT domain :%IPR013136:WSTF/Acf1/Cbp146|
XLOC_011465	12[-]542633-544254	-	37.7056	89.6869	-1.25012	0.00945	0.818002	Down	rcu:RCOM_0503360	67	583	1e-164	omega-6 desaturase, endoplasmic reticulum (EC:1.14.99.33); K10256 omega-6 fatty acid desaturase (delta-12 desaturase) [EC:1.14.19.-]	|Metabolism; Lipid Metabolism; Biosynthesis of unsaturated fatty acids [PATH:ko01040-Map:ko01040];|Metabolism; Lipid Metabolism; Lipid biosynthesis proteins [BR:ko01004];|	|%IPR005804:Fatty acid desaturase, type 1 :%IPR021863:Protein of unknown function DUF3474|	|GO:0016717:oxidoreductase activity, acting on paired donors, with oxidation of a pair of donors resulting in the reduction of molecular oxygen to two molecules of water|		|GO:0006629:lipid metabolic process|GO:0055114:oxidation-reduction process|
XLOC_011478	12[-]1141241-1144141	-	0.386929	1.88614	-2.28529	0.0413	0.996326	Down
XLOC_011493	12[-]2287122-2287636	Capana12g000132,	30.0658	70.1422	-1.22216	0.02365	0.996326	Down	pop:POPTR_650065	52	104	2e-21	hypothetical protein
XLOC_011495	12[-]2323581-2329122	Capana12g000136,	4.78842	1.66668	1.52258	0.0121	0.891836	Up	vvi:100242615	65	650	0	hypothetical protein LOC100242615		|%IPR001932:Protein phosphatase 2C (PP2C)-like domain :%IPR015655:Protein phosphatase 2C|	|GO:0003824:catalytic activity|
XLOC_011512	12[-]3013098-3015132	Capana12g000182,	95.321	230.371	-1.27309	0.00725	0.739361	Down	pop:POPTR_564352	56	315	3e-84	MYB212; hypothetical protein; K09422 myb proto-oncogene protein, plant	|Genetic Information Processing; Transcription; Transcription factors [BR:ko03000];|	|%IPR001005:SANT/Myb domain :%IPR009057:Homeodomain-like|	|GO:0003677:DNA binding|GO:0003682:chromatin binding|
XLOC_011513	12[-]3024572-3025785	Capana12g000183,	20.8738	54.0969	-1.37385	0.00905	0.799324	Down	pop:POPTR_566874	54	305	3e-81	MYB036; hypothetical protein; K09422 myb proto-oncogene protein, plant	|Genetic Information Processing; Transcription; Transcription factors [BR:ko03000];|	|%IPR001005:SANT/Myb domain :%IPR009057:Homeodomain-like|	|GO:0003677:DNA binding|GO:0003682:chromatin binding|
XLOC_011553	12[-]4452408-4453555	-	1.93988	0.417705	2.21541	0.04085	0.996326	Up							|%IPR021929:Late blight resistance protein R1 :|
XLOC_011587	12[-]7912243-7914715	Capana12g000389,	1.50156	3.74654	-1.3191	0.0311	0.996326	Down	pop:POPTR_786501	46	498	1e-139	hypothetical protein		|%IPR000719:Protein kinase domain :%IPR001245:Serine-threonine/tyrosine-protein kinase catalytic domain|	|GO:0004672:protein kinase activity|GO:0004713:protein tyrosine kinase activity|GO:0005515:protein binding|GO:0005524:ATP binding|GO:0016772:transferase activity, transferring phosphorus-containing groups|		|GO:0006468:protein phosphorylation|
XLOC_011684	12[-]20452714-20457251	Capana12g000719,	2.07501	8.21349	-1.98488	0.0011	0.36803	Down	vvi:100252216	60	584	1e-165	hypothetical protein LOC100252216
XLOC_011716	12[-]28447530-28449158	Capana12g000840,	2.25891	7.59464	-1.74935	0.0127	0.892621	Down	pop:POPTR_249149	47	94	1e-17	hypothetical protein
XLOC_011730	12[-]36342120-36344035	Capana12g000940,	1.18646	5.29861	-2.15896	0.007	0.739361	Down	vvi:100245407	62	467	1e-130	hypothetical protein LOC100245407		|%IPR000620:Drug/metabolite transporter :%IPR004853:Triose-phosphate transporter domain|		|GO:0016020:membrane|
XLOC_011738	12[-]39268916-39274320	Capana12g000990,	2.83964	9.8072	-1.78813	0.01205	0.891836	Down	rcu:RCOM_0684970	47	98.2	3e-19	hypothetical protein; K13464 jasmonate ZIM domain-containing protein	|Environmental Information Processing; Signal Transduction; Plant hormone signal transduction [PATH:ko04075-Map:ko04075];|Organismal Systems; Environmental Adaptation; Plant-pathogen interaction [PATH:ko04626-Map:ko04626];|	|%IPR010399:Tify :%IPR018467:CO/COL/TOC1, conserved site|
XLOC_011765	12[-]46841401-46844285	Capana12g001119,	7.24702	15.7484	-1.11975	0.04995	0.996326	Down	ath:AT5G41470	37	172	3e-41	hypothetical protein
XLOC_011781	12[-]52811864-52813548	Capana12g001179,	45.5943	107.705	-1.24016	0.00955	0.82188	Down	vvi:100256427	51	164	1e-38	hypothetical protein LOC100256427		|%IPR000649:Initiation factor 2B-related :%IPR007612:LURP1-like domain|			|GO:0044237:cellular metabolic process|
XLOC_011825	12[-]89664280-89668993	-	3.23329	7.56569	-1.22647	0.0399	0.996326	Down	vvi:100242014	52	128	7e-33	hypothetical protein LOC100242014; K14570 RNA exonuclease 1 [EC:3.1.-.-]	|Genetic Information Processing; Translation; Ribosome Biogenesis [BR:ko03009];|Genetic Information Processing; Translation; Ribosome biogenesis in eukaryotes [PATH:ko03008-Map:ko03008];|	|%IPR002023:NADH-quinone oxidoreductase subunit E like :|	|GO:0016491:oxidoreductase activity|		|GO:0055114:oxidation-reduction process|
XLOC_011929	12[-]184164871-184182455	Capana12g001959,Capana12g001960,	1.09461	0.419767	1.38275	0.0456	0.996326	Up	vvi:100259153	50	891	0	hypothetical protein LOC100259153
XLOC_011950	12[-]193981518-193985223	Capana12g002042,	5.32669	14.293	-1.424	0.00845	0.776592	Down	vvi:100265977	68	885	0	hypothetical protein LOC100265977		|%IPR000192:Aminotransferase, class V/Cysteine desulfurase :%IPR015421:Pyridoxal phosphate-dependent transferase, major region, subdomain 1|	|GO:0003824:catalytic activity|GO:0030170:pyridoxal phosphate binding|		|GO:0008152:metabolic process|
XLOC_011988	12[-]202302332-202306328	Capana12g002169,	0.684699	0.18595	1.88055	0.04675	0.996326	Up	vvi:100258295	65	813	0	hypothetical protein LOC100258295		|%IPR002885:Pentatricopeptide repeat :|
XLOC_012002	12[-]208218641-208220495	Capana12g002241,	18052.1	0	inf	0.0079	0.756393	Up
XLOC_012007	12[-]208685885-208688420	Capana12g002257,	216.604	491.893	-1.18328	0.01185	0.891054	Down	ath:AT3G56240	79	148	3e-34	CCH; CCH (COPPER CHAPERONE); copper chaperone
XLOC_012019	12[-]210664609-210665266	-	16.39	6.45331	1.3447	0.0371	0.996326	Up	pop:POPTR_906310	80	243	5e-63	pectinesterase family protein (EC:3.1.1.11)		|%IPR000070:Pectinesterase, catalytic :%IPR011050:Pectin lyase fold/virulence factor|	|GO:0030599:pectinesterase activity|	|GO:0005618:cell wall|	|GO:0042545:cell wall modification|
XLOC_012045	12[-]216588008-216590712	Capana12g002432,	1.41751	5.63033	-1.98986	0.0018	0.466075	Down	vvi:100260629	49	517	1e-144	hypothetical protein LOC100260629		|%IPR001906:Terpene synthase, N-terminal domain :%IPR005630:Terpene synthase, metal-binding domain|	|GO:0000287:magnesium ion binding|GO:0010333:terpene synthase activity|GO:0016829:lyase activity|		|GO:0008152:metabolic process|
XLOC_012047	12[-]217619379-217621714	Capana12g002445,	9.07187	23.7451	-1.38816	0.00985	0.830401	Down	vvi:100263449	55	554	1e-156	hypothetical protein LOC100263449		|%IPR001128:Cytochrome P450 :%IPR002401:Cytochrome P450, E-class, group I|	|GO:0005506:iron ion binding|GO:0009055:electron carrier activity|GO:0016705:oxidoreductase activity, acting on paired donors, with incorporation or reduction of molecular oxygen|GO:0020037:heme binding|		|GO:0055114:oxidation-reduction process|
XLOC_012054	12[-]218499517-218511698	Capana12g002473,	20.7001	9.13122	1.18076	0.01475	0.928564	Up	rcu:RCOM_1010880	43	1206	0	suppressor of ty, putative		|%IPR005100:Transcription elongation factor Spt5, NGN domain :%IPR005824:KOW|			|GO:0006357:regulation of transcription from RNA polymerase II promoter|GO:0032784:regulation of DNA-dependent transcription, elongation|
XLOC_012068	12[-]220704078-220730632	Capana12g002522,	10.6424	4.06358	1.389	0.01125	0.880127	Up	vvi:100266959	59	1024	0	hypothetical protein LOC100266959; K11984 U4/U6.U5 tri-snRNP-associated protein 1	|Genetic Information Processing; Folding, Sorting and Degradation; Ubiquitin system [BR:ko04121];|Genetic Information Processing; Transcription; Spliceosome [BR:ko03041];|Genetic Information Processing; Transcription; Spliceosome [PATH:ko03040-Map:ko03040];|	|%IPR005011:SART-1 protein :|
XLOC_012086	12[-]223215799-223217270	-	6.43411e-05	2.02207	-14.9397	0.02625	0.996326	Down
XLOC_012136	12[-]226467445-226472785	Capana12g002719,	1.7992	0.748032	1.26618	0.04665	0.996326	Up	rcu:RCOM_1203530	55	1018	0	transcription factor, putative		|%IPR000270:Phox/Bem1p :%IPR003035:RWP-RK domain|	|GO:0005515:protein binding|
XLOC_012221	12[.]1024332-1025933	-	2.33261	0.358441	2.70214	0.01045	0.845023	Up	pop:POPTR_664707	36	182	6e-44	hypothetical protein
XLOC_012228	12[.]1141493-1143121	-	0.490082	5.52284e-05	13.1153	0.0427	0.996326	Up
XLOC_012239	12[.]2434298-2435463	-	76.8826	162.118	-1.07632	0.02405	0.996326	Down	vvi:100253295	69	163	2e-38	hypothetical protein LOC100253295
XLOC_012240	12[.]2489993-2491278	-	54.1906	108.85	-1.00623	0.0387	0.996326	Down
XLOC_012272	12[.]9486891-9488945	-	0.954746	0.000193632	12.2676	0.01295	0.892621	Up
XLOC_012293	12[.]14348070-14349523	-	35.9169	97.4039	-1.43932	0.00395	0.639234	Down	rcu:RCOM_1599530	40	170	2e-40	hypothetical protein
XLOC_012305	12[.]19180032-19181433	-	1.44005	4.04744	-1.49089	0.0256	0.996326	Down
XLOC_012318	12[.]23205926-23207173	-	14.5008	31.8999	-1.13742	0.0285	0.996326	Down	rcu:RCOM_1587340	48	190	2e-46	hypothetical protein
XLOC_012330	12[.]26979104-26980343	-	7.53805	16.456	-1.12635	0.0407	0.996326	Down
XLOC_012333	12[.]29053556-29054962	-	2.47947	7.76009	-1.64604	0.0071	0.739361	Down	vvi:100241414	29	53.5	9e-11	hypothetical protein LOC100241414
XLOC_012340	12[.]33656821-33658112	-	3.78097	10.7775	-1.51119	0.0116	0.88802	Down
XLOC_012354	12[.]39459206-39461614	-	1.67787	4.19217	-1.32107	0.02835	0.996326	Down	vvi:100241280	28	103	5e-20	hypothetical protein LOC100241280		|%IPR007644:RNA polymerase, beta subunit, protrusion :%IPR015712:DNA-directed RNA polymerase, subunit 2|	|GO:0003677:DNA binding|GO:0003899:DNA-directed RNA polymerase activity|GO:0032549:ribonucleoside binding|		|GO:0006351:transcription, DNA-dependent|
XLOC_012374	12[.]52082064-52082724	-	0	0.705496	-inf	0.00345	0.639234	Down	rcu:RCOM_0646580	72	179	5e-55	Protein AFR, putative		|%IPR015916:Galactose oxidase, beta-propeller :|
XLOC_012504	12[.]195301900-195302193	-	8.88894	0.00129543	12.7444	0.0391	0.996326	Up
XLOC_012563	12[.]214817337-214818473	-	5.75338	14.717	-1.355	0.01925	0.996326	Down
XLOC_012582	12[.]219829984-219831387	-	9.7959	24.1348	-1.30087	0.0167	0.952636	Down	pop:POPTR_779447	47	111	1e-22	hypothetical protein
XLOC_012594	12[.]223215763-223216739	-	5.15735	0.940849	2.4546	0.0401	0.996326	Up
XLOC_012613	12[.]226654557-226655694	-	38.2368	96.7655	-1.33953	0.00705	0.739361	Down	vvi:100261167	31	80.1	3e-13	similar to Os01g0238200
XLOC_012730	2[+]42563763-42576599	Capana02g000305,	0.495316	2.9148	-2.55697	0.025	0.996326	Down	rcu:RCOM_1534000	70	640	0	serine carboxypeptidase, putative (EC:3.4.16.6); K13289 cathepsin A (carboxypeptidase C) [EC:3.4.16.5]	|Cellular Processes; Transport and Catabolism; Lysosome [PATH:ko04142-Map:ko04142];|Genetic Information Processing; Folding, Sorting and Degradation; Chaperones and folding catalysts [BR:ko03110];|Metabolism; Enzyme Families; Peptidases [BR:ko01002];|Organismal Systems; Endocrine System; Renin-angiotensin system [PATH:ko04614-Map:ko04614];|	|%IPR001563:Peptidase S10, serine carboxypeptidase :%IPR018202:Peptidase S10, serine carboxypeptidase, active site|	|GO:0004185:serine-type carboxypeptidase activity|		|GO:0006508:proteolysis|
XLOC_012765	2[+]61069510-61071825	Capana02g000475,	9.91575	26.4787	-1.41704	0.03525	0.996326	Down	pop:POPTR_219359	63	603	1e-170	hypothetical protein		|%IPR003593:AAA+ ATPase domain :%IPR003959:ATPase, AAA-type, core|	|GO:0000166:nucleotide binding|GO:0005524:ATP binding|GO:0017111:nucleoside-triphosphatase activity|
XLOC_012772	2[+]64948382-64949210	Capana02g000496,	28.1547	59.1297	-1.0705	0.0413	0.996326	Down	rcu:RCOM_1438370	59	157	6e-37	AP2 domain transcription factor RAP2.3, putative		|%IPR001471:AP2/ERF domain :%IPR016177:DNA-binding domain|	|GO:0003677:DNA binding|GO:0003700:sequence-specific DNA binding transcription factor activity|		|GO:0006355:regulation of transcription, DNA-dependent|
XLOC_012788	2[+]72861131-72862550	Capana02g000568,	22.3004	5.12454	2.12157	0.00065	0.307223	Up	rcu:RCOM_0774930	73	464	1e-129	Lignin-forming anionic peroxidase precursor, putative (EC:1.11.1.7); K00430 peroxidase [EC:1.11.1.7]	|Metabolism; Amino Acid Metabolism; Phenylalanine metabolism [PATH:ko00360-Map:ko00360];|Metabolism; Biosynthesis of Other Secondary Metabolites; Phenylpropanoid biosynthesis [PATH:ko00940-Map:ko00940];|Metabolism; Energy Metabolism; Methane metabolism [PATH:ko00680-Map:ko00680];|	|%IPR000823:Plant peroxidase :%IPR002016:Haem peroxidase, plant/fungal/bacterial|	|GO:0004601:peroxidase activity|GO:0020037:heme binding|		|GO:0006979:response to oxidative stress|GO:0055114:oxidation-reduction process|
XLOC_012821	2[+]88682731-88687550	Capana02g000741,	4.52809	2.14154	1.08026	0.0452	0.996326	Up	vvi:100249854	76	1540	0	hypothetical protein LOC100249854; K01869 leucyl-tRNA synthetase [EC:6.1.1.4]	|Genetic Information Processing; Translation; Aminoacyl-tRNA biosynthesis [PATH:ko00970-Map:ko00970];|Metabolism; Amino Acid Metabolism; Amino acid related enzymes [BR:ko01007];|Metabolism; Amino Acid Metabolism; Valine, leucine and isoleucine biosynthesis [PATH:ko00290-Map:ko00290];|	|%IPR001412:Aminoacyl-tRNA synthetase, class I, conserved site :%IPR002300:Aminoacyl-tRNA synthetase, class Ia|	|GO:0000166:nucleotide binding|GO:0002161:aminoacyl-tRNA editing activity|GO:0004812:aminoacyl-tRNA ligase activity|GO:0004823:leucine-tRNA ligase activity|GO:0005524:ATP binding|	|GO:0005737:cytoplasm|	|GO:0006418:tRNA aminoacylation for protein translation|GO:0006429:leucyl-tRNA aminoacylation|
XLOC_012844	2[+]96018205-96019899	Capana02g000835,	3.14948	8.29671	-1.39743	0.03115	0.996326	Down	vvi:100257672	73	276	1e-72	UPF0497 membrane protein 3		|%IPR006459:Uncharacterised protein family UPF0497, trans-membrane plant subgroup :%IPR006702:Uncharacterised protein family UPF0497, trans-membrane plant|
XLOC_012867	2[+]103186256-103187570	-	8.12052e-05	0.992467	-13.5772	0.04625	0.996326	Down
XLOC_012872	2[+]103609333-103680724	Capana02g000945,	476.391	1142.39	-1.26183	0.00815	0.770421	Down
XLOC_012903	2[+]109759681-109761808	Capana02g001094,	2.8845	7.05962	-1.29127	0.0295	0.996326	Down	vvi:100263449	55	552	1e-155	hypothetical protein LOC100263449		|%IPR001128:Cytochrome P450 :%IPR002401:Cytochrome P450, E-class, group I|	|GO:0005506:iron ion binding|GO:0009055:electron carrier activity|GO:0016705:oxidoreductase activity, acting on paired donors, with incorporation or reduction of molecular oxygen|GO:0020037:heme binding|		|GO:0055114:oxidation-reduction process|
XLOC_012927	2[+]113411450-113414239	Capana02g001180,	2.4641	6.615	-1.42468	0.02985	0.996326	Down	vvi:100259388	38	109	2e-22	hypothetical protein LOC100259388		|%IPR025886:Phloem protein 2-like :|
XLOC_012932	2[+]114197807-114200977	Capana02g001202,	0.739034	0.134551	2.45749	0.02905	0.996326	Up	vvi:100247943	68	964	0	hypothetical protein LOC100247943		|%IPR002885:Pentatricopeptide repeat :%IPR011990:Tetratricopeptide-like helical|	|GO:0005515:protein binding|
XLOC_012987	2[+]124454724-124456508	Capana02g001423,	2.08259	5.94575	-1.51348	0.0128	0.892621	Down	pop:POPTR_839640	59	638	0	hypothetical protein		|%IPR006094:FAD linked oxidase, N-terminal :%IPR012951:Berberine/berberine-like|	|GO:0003824:catalytic activity|GO:0008762:UDP-N-acetylmuramate dehydrogenase activity|GO:0016491:oxidoreductase activity|GO:0016614:oxidoreductase activity, acting on CH-OH group of donors|GO:0050660:flavin adenine dinucleotide binding|		|GO:0055114:oxidation-reduction process|
XLOC_012993	2[+]125133322-125136000	Capana02g001450,	4.73781	12.444	-1.39316	0.03095	0.996326	Down	pop:POPTR_758701	50	119	1e-25	hypothetical protein
XLOC_012997	2[+]125694335-125696601	Capana02g001472,	0.747411	0	inf	0.0011	0.36803	Up	pop:POPTR_822902	78	205	3e-51	GA2ox6; gibberellin 2-oxidase; K04125 gibberellin 2-oxidase [EC:1.14.11.13]	|Metabolism; Metabolism of Terpenoids and Polyketides; Diterpenoid biosynthesis [PATH:ko00904-Map:ko00904];|	|%IPR005123:Oxoglutarate/iron-dependent dioxygenase :%IPR027443:Isopenicillin N synthase-like|	|GO:0016491:oxidoreductase activity|GO:0016706:oxidoreductase activity, acting on paired donors, with incorporation or reduction of molecular oxygen, 2-oxoglutarate as one donor, and incorporation of one atom each of oxygen into both donors|		|GO:0055114:oxidation-reduction process|
XLOC_012999	2[+]125814992-125816044	Capana02g001482,	0.684417	2.93702	-2.10141	0.024	0.996326	Down	vvi:100257199	37	79	5e-13	hypothetical protein LOC100257199
XLOC_013021	2[+]127589246-127599414	Capana02g001554,	4.76594	2.14313	1.15304	0.0318	0.996326	Up	vvi:100257580	60	2331	0	hypothetical protein LOC100257580; K14314 nuclear pore complex protein Nup210	|Genetic Information Processing; Translation; RNA transport [PATH:ko03013-Map:ko03013];|	|%IPR003343:Bacterial Ig-like, group 2 :%IPR008964:Invasin/intimin cell-adhesion|
XLOC_013062	2[+]130156424-130160364	Capana02g001672,	13.6941	43.5257	-1.66831	0.00245	0.565532	Down	vvi:100263543	86	409	1e-112	hypothetical protein LOC100263543		|%IPR000425:Major intrinsic protein :%IPR022357:Major intrinsic protein, conserved site|	|GO:0005215:transporter activity|	|GO:0016020:membrane|	|GO:0006810:transport|
XLOC_013063	2[+]130189797-130202290	Capana02g001676,	2.03274	5.72935	-1.49494	0.0235	0.996326	Down	vvi:100244640	66	866	0	hypothetical protein LOC100244640		|%IPR000719:Protein kinase domain :%IPR001245:Serine-threonine/tyrosine-protein kinase catalytic domain|	|GO:0004672:protein kinase activity|GO:0004674:protein serine/threonine kinase activity|GO:0004713:protein tyrosine kinase activity|GO:0005515:protein binding|GO:0005524:ATP binding|GO:0016772:transferase activity, transferring phosphorus-containing groups|		|GO:0006468:protein phosphorylation|
XLOC_013094	2[+]133222594-133223509	Capana02g001800,	46.9302	117.412	-1.32299	0.00925	0.807734	Down	vvi:100258874	36	89.7	3e-16	hypothetical protein LOC100258874
XLOC_013128	2[+]136494921-136497252	Capana02g001947,	0	1.37811	-inf	5e-05	0.0875794	Down	pop:POPTR_827839	51	173	1e-41	hypothetical protein
XLOC_013141	2[+]136952603-136981902	Capana02g001970,	15.8827	6.68421	1.24862	0.0162	0.942163	Up	pop:POPTR_550419	79	2139	0	MOR2; microtubule organization protein		|%IPR011989:Armadillo-like helical :%IPR016024:Armadillo-type fold|	|GO:0005488:binding|
XLOC_013239	2[+]142794622-142797955	Capana02g002275,	0.854067	0	inf	0.00385	0.639234	Up	vvi:100261818	67	348	3e-94	hypothetical protein LOC100261818		|%IPR002885:Pentatricopeptide repeat :|
XLOC_013260	2[+]143473497-143475591	Capana02g002345,	56.5479	27.3702	1.04687	0.03355	0.996326	Up	vvi:100258019	76	870	0	hypothetical protein LOC100258019; K11131 H/ACA ribonucleoprotein complex subunit 4 [EC:5.4.99.-]	|Genetic Information Processing; Replication and Repair; DNA replication proteins [BR:ko03032];|Genetic Information Processing; Translation; Ribosome Biogenesis [BR:ko03009];|Genetic Information Processing; Translation; Ribosome biogenesis in eukaryotes [PATH:ko03008-Map:ko03008];|	|%IPR002478:Pseudouridine synthase/archaeosine transglycosylase :%IPR002501:Pseudouridine synthase II|	|GO:0003723:RNA binding|GO:0009982:pseudouridine synthase activity|		|GO:0001522:pseudouridine synthesis|GO:0006396:RNA processing|GO:0009451:RNA modification|
XLOC_013270	2[+]143827713-143829367	Capana02g002372,	3.40373	1.11835	1.60575	0.02475	0.996326	Up	rcu:RCOM_0128280	44	229	5e-58	r2r3-myb transcription factor, putative; K09422 myb proto-oncogene protein, plant	|Genetic Information Processing; Transcription; Transcription factors [BR:ko03000];|	|%IPR001005:SANT/Myb domain :%IPR009057:Homeodomain-like|	|GO:0003677:DNA binding|GO:0003682:chromatin binding|
XLOC_013280	2[+]144082001-144085162	Capana02g002395,	13.9544	5.92251	1.23644	0.01805	0.984386	Up	vvi:100265580	50	826	0	hypothetical protein LOC100265580; K12591 exosome complex exonuclease RRP6 [EC:3.1.13.-]	|Genetic Information Processing; Folding, Sorting and Degradation; RNA degradation [PATH:ko03018-Map:ko03018];|	|%IPR002121:HRDC domain :%IPR002562:3'-5' exonuclease domain|	|GO:0000166:nucleotide binding|GO:0003676:nucleic acid binding|GO:0003824:catalytic activity|GO:0008408:3'-5' exonuclease activity|	|GO:0005622:intracellular|	|GO:0006139:nucleobase-containing compound metabolic process|GO:0044237:cellular metabolic process|
XLOC_013305	2[+]145341210-145350168	Capana02g002460,	1.01763	0.296458	1.77931	0.03375	0.996326	Up	rcu:RCOM_0873700	45	562	1e-158	poly(A) polymerase, putative (EC:2.7.7.19)		|%IPR002646:Poly A polymerase, head domain :|	|GO:0003723:RNA binding|GO:0016779:nucleotidyltransferase activity|		|GO:0006396:RNA processing|
XLOC_013391	2[+]149081822-149084893	Capana02g002687,	10.7862	4.60453	1.22806	0.0209	0.996326	Up	vvi:100246179	66	813	0	hypothetical protein LOC100246179		|%IPR005202:Transcription factor GRAS :|
XLOC_013406	2[+]149634187-149636800	Capana02g002721,	16.5454	6.50051	1.3478	0.00915	0.801352	Up	pop:POPTR_870206	78	963	0	hypothetical protein		|%IPR001117:Multicopper oxidase, type 1 :%IPR002355:Multicopper oxidase, copper-binding site|	|GO:0005507:copper ion binding|GO:0016491:oxidoreductase activity|GO:0052716:hydroquinone:oxygen oxidoreductase activity|	|GO:0048046:apoplast|	|GO:0046274:lignin catabolic process|GO:0055114:oxidation-reduction process|
XLOC_013417	2[+]149869537-149871210	Capana02g002739,	9.06541	22.4952	-1.31117	0.0157	0.940642	Down	ath:AT5G66400	48	137	2e-30	RAB18; RAB18 (RESPONSIVE TO ABA 18)		|%IPR000167:Dehydrin :|			|GO:0006950:response to stress|GO:0009415:response to water stimulus|
XLOC_013433	2[+]150189622-150190447	Capana02g002765,	138.338	281.333	-1.02409	0.0321	0.996326	Down	vvi:100254788	45	97.4	1e-18	hypothetical protein LOC100254788
XLOC_013440	2[+]150446621-150449548	Capana02g002776,	24.1089	8.3792	1.52468	0.00495	0.671798	Up	vvi:100258332	81	863	0	hypothetical protein LOC100258332; K10717 cytokinin trans-hydroxylase	|Metabolism; Metabolism of Terpenoids and Polyketides; Zeatin biosynthesis [PATH:ko00908-Map:ko00908];|	|%IPR001128:Cytochrome P450 :%IPR002401:Cytochrome P450, E-class, group I|	|GO:0005506:iron ion binding|GO:0009055:electron carrier activity|GO:0016705:oxidoreductase activity, acting on paired donors, with incorporation or reduction of molecular oxygen|GO:0020037:heme binding|		|GO:0055114:oxidation-reduction process|
XLOC_013482	2[+]152191786-152193627	Capana02g002899,	8.39449	19.6347	-1.22589	0.0207	0.996326	Down	rcu:RCOM_0187390	49	296	2e-78	DNA binding protein, putative		|%IPR011598:Myc-type, basic helix-loop-helix (bHLH) domain :|	|GO:0046983:protein dimerization activity|
XLOC_013489	2[+]152377184-152379530	Capana02g002909,Capana02g002910,	0.768395	5.07033	-2.72216	0.0008	0.340309	Down	vvi:100243873	34	105	3e-43	hypothetical protein LOC100243873		|%IPR011598:Myc-type, basic helix-loop-helix (bHLH) domain :|	|GO:0046983:protein dimerization activity|
XLOC_013490	2[+]152401521-152403807	Capana02g002911,	45.3865	112.174	-1.30541	0.00835	0.774573	Down	rcu:RCOM_0188790	37	193	3e-47	DNA binding protein, putative (EC:1.3.1.74)		|%IPR011598:Myc-type, basic helix-loop-helix (bHLH) domain :|	|GO:0046983:protein dimerization activity|
XLOC_013572	2[+]155903755-155907574	Capana02g003112,	13.302	29.2115	-1.1349	0.0258	0.996326	Down	vvi:100242341	76	501	0	hypothetical protein LOC100242341
XLOC_013579	2[+]156175152-156177259	Capana02g003128,	11.6068	33.5281	-1.5304	0.0062	0.704647	Down	vvi:100244172	66	541	1e-152	hypothetical protein LOC100244172		|%IPR002641:Patatin/Phospholipase A2-related :%IPR016035:Acyl transferase/acyl hydrolase/lysophospholipase|			|GO:0006629:lipid metabolic process|GO:0008152:metabolic process|
XLOC_013610	2[+]157323134-157324124	-	1.60844	0.000385474	12.0267	0.0484	0.996326	Up
XLOC_013614	2[+]157404066-157406236	Capana02g003218,	2.00146	5.09988	-1.34941	0.04065	0.996326	Down
XLOC_013659	2[+]159129973-159131927	Capana02g003327,	11.3513	4.80645	1.23982	0.02515	0.996326	Up	pop:POPTR_759531	39	333	2e-89	hypothetical protein		|%IPR002213:UDP-glucuronosyl/UDP-glucosyltransferase :|	|GO:0016758:transferase activity, transferring hexosyl groups|		|GO:0008152:metabolic process|
XLOC_013670	2[+]159436058-159443563	Capana02g003350,	16.4197	33.7195	-1.03816	0.0374	0.996326	Down	vvi:100266864	51	271	7e-71	hypothetical protein LOC100266864		|%IPR009097:RNA ligase/cyclic nucleotide phosphodiesterase :%IPR019510:Protein kinase A anchor protein, nuclear localisation signal domain|	|GO:0003824:catalytic activity|		|GO:0016070:RNA metabolic process|
XLOC_013736	2[+]162008500-162012956	Capana02g003534,	4.30103	8.91519	-1.05158	0.0494	0.996326	Down	rcu:RCOM_1095590	75	1241	0	Stachyose synthase precursor, putative (EC:2.4.1.67)		|%IPR008811:Glycosyl hydrolases 36 :%IPR013785:Aldolase-type TIM barrel|	|GO:0003824:catalytic activity|
XLOC_013812	2[-]5768799-5769578	-	17.1556	36.9808	-1.1081	0.0483	0.996326	Down	vvi:100243311	83	118	2e-25	hypothetical protein LOC100243311
XLOC_013826	2[-]13778257-13779290	Capana02g000080,	17.5483	45.9688	-1.38933	0.00885	0.795842	Down	rcu:RCOM_0303920	58	300	2e-79	hypothetical protein
XLOC_013830	2[-]15800566-15802114	-	55.1732	10.26	2.42693	0.00015	0.148885	Up
XLOC_013832	2[-]16275571-16276883	Capana02g000106,	41.683	94.471	-1.18041	0.0187	0.996326	Down
XLOC_013851	2[-]25470638-25489305	Capana02g000206,	2.04728	0.763436	1.42313	0.01685	0.9557	Up	vvi:100261159	35	745	0	hypothetical protein LOC100261159
XLOC_013908	2[-]55626514-55628947	Capana02g000423,	2.0122	4.89129	-1.28144	0.0424	0.996326	Down	pop:POPTR_572572	79	535	1e-150	galactinol synthase (EC:2.4.1.123)		|%IPR002495:Glycosyl transferase, family 8 :|	|GO:0016757:transferase activity, transferring glycosyl groups|
XLOC_013910	2[-]56539501-56559835	Capana02g000428,	0.833846	0.252105	1.72575	0.0383	0.996326	Up	vvi:100263666	56	826	0	hypothetical protein LOC100263666		|%IPR002885:Pentatricopeptide repeat :%IPR011990:Tetratricopeptide-like helical|	|GO:0005515:protein binding|
XLOC_013913	2[-]56711914-56712426	-	2.37032	0.000453147	12.3528	0.04265	0.996326	Up	vvi:100261485	50	107	4e-22	hypothetical protein LOC100261485		|%IPR000007:Tubby, C-terminal :%IPR025659:Tubby C-terminal-like domain|
XLOC_013931	2[-]68483625-68486621	-	0.323913	1.90694	-2.55758	0.0454	0.996326	Down
XLOC_013989	2[-]87847839-87874654	-	1.73467	5.42607	-1.64525	0.0295	0.996326	Down
XLOC_014004	2[-]92207696-92210499	-	2.14518	9.16658	-2.09528	0.0232	0.996326	Down
XLOC_014046	2[-]102410864-102417115	Capana02g000918,	4.1296	10.108	-1.29143	0.02235	0.996326	Down	rcu:RCOM_0855110	50	363	2e-98	WRKY transcription factor, putative		|%IPR003657:DNA-binding WRKY :|	|GO:0003700:sequence-specific DNA binding transcription factor activity|GO:0043565:sequence-specific DNA binding|		|GO:0006355:regulation of transcription, DNA-dependent|
XLOC_014053	2[-]103431834-103434978	Capana02g000943,	6.4904	3.08742	1.07191	0.04745	0.996326	Up	rcu:RCOM_0853180	69	860	0	BRASSINOSTEROID INSENSITIVE 1-associated receptor kinase 1 precursor, putative		|%IPR000719:Protein kinase domain :%IPR001245:Serine-threonine/tyrosine-protein kinase catalytic domain|	|GO:0004672:protein kinase activity|GO:0004713:protein tyrosine kinase activity|GO:0005524:ATP binding|GO:0016772:transferase activity, transferring phosphorus-containing groups|		|GO:0006468:protein phosphorylation|
XLOC_014089	2[-]109682580-109685162	Capana02g001089,	8.70234	34.9883	-2.0074	0.0003	0.235082	Down	vvi:100257265	46	536	1e-150	hypothetical protein LOC100257265		|%IPR001906:Terpene synthase, N-terminal domain :%IPR005630:Terpene synthase, metal-binding domain|	|GO:0000287:magnesium ion binding|GO:0010333:terpene synthase activity|GO:0016829:lyase activity|		|GO:0008152:metabolic process|
XLOC_014091	2[-]109824754-109834485	Capana02g001102,Capana02g001103,	5.39763	2.51386	1.10242	0.03485	0.996326	Up	rcu:RCOM_0613750	78	1964	0	calmodulin binding protein, putative		|%IPR000299:FERM domain :%IPR000857:MyTH4 domain|	|GO:0003777:microtubule motor activity|GO:0003824:catalytic activity|GO:0005524:ATP binding|GO:0008017:microtubule binding|GO:0016491:oxidoreductase activity|	|GO:0005856:cytoskeleton|GO:0005871:kinesin complex|	|GO:0007018:microtubule-based movement|GO:0055114:oxidation-reduction process|
XLOC_014103	2[-]111355918-111356595	Capana02g001141,	44.541	101.083	-1.18233	0.0224	0.996326	Down	rcu:RCOM_0894010	38	105	2e-21	hypothetical protein
XLOC_014107	2[-]112129655-112154253	Capana02g001154,Capana02g001155,	3.24505	1.41316	1.19932	0.02725	0.996326	Up	pop:POPTR_581257	55	2368	0	CHR906; chromatin remodeling complex subunit		|%IPR000330:SNF2-related :%IPR000953:Chromo domain/shadow|	|GO:0003676:nucleic acid binding|GO:0003677:DNA binding|GO:0004386:helicase activity|GO:0005515:protein binding|GO:0005524:ATP binding|GO:0008270:zinc ion binding|
XLOC_014166	2[-]122687480-122693566	Capana02g001368,	5.62919	15.3905	-1.45105	0.005	0.671798	Down	pop:POPTR_1069914	73	1067	0	hypothetical protein		|%IPR003864:Domain of unknown function DUF221 :%IPR027815:Domain of unknown function DUF4463|		|GO:0016020:membrane|
XLOC_014205	2[-]126029383-126032998	Capana02g001489,	2.26208	0.954461	1.24489	0.0444	0.996326	Up	vvi:100243189	60	578	1e-163	hypothetical protein LOC100243189		|%IPR002885:Pentatricopeptide repeat :%IPR011990:Tetratricopeptide-like helical|	|GO:0005515:protein binding|
XLOC_014212	2[-]126166538-126175926	Capana02g001501,	68.4157	23.1387	1.56402	0.0015	0.461544	Up	pop:POPTR_580906	53	964	0	hypothetical protein		|%IPR000608:Ubiquitin-conjugating enzyme, E2 :%IPR016135:Ubiquitin-conjugating enzyme/RWD-like|	|GO:0016881:acid-amino acid ligase activity|
XLOC_014223	2[-]127392317-127399125	Capana02g001552,	2.92975	1.28236	1.19197	0.03835	0.996326	Up	rcu:RCOM_1082870	24	172	2e-40	hypothetical protein
XLOC_014244	2[-]130040692-130042874	Capana02g001664,	8.1923	3.17482	1.36759	0.01775	0.982476	Up	vvi:100248143	61	682	0	hypothetical protein LOC100248143		|%IPR002885:Pentatricopeptide repeat :%IPR011990:Tetratricopeptide-like helical|	|GO:0005515:protein binding|
XLOC_014268	2[-]132410013-132413608	Capana02g001745,	4.19055	1.57298	1.41364	0.0159	0.941093	Up	vvi:100253264	40	431	1e-118	hypothetical protein LOC100253264
XLOC_014286	2[-]134467007-134473165	Capana02g001846,	3.76058	14.4334	-1.94038	0.00085	0.351534	Down	vvi:100267554	81	99.8	6e-22	hypothetical protein LOC100267554		|%IPR004326:Mlo-related protein :|		|GO:0016021:integral to membrane|	|GO:0006952:defense response|
XLOC_014288	2[-]134571005-134572091	Capana02g001851,	80.5947	191.262	-1.2468	0.01125	0.880127	Down	rcu:RCOM_1012500	56	176	4e-42	Ethylene-responsive transcription factor, putative		|%IPR001471:AP2/ERF domain :%IPR016177:DNA-binding domain|	|GO:0003677:DNA binding|GO:0003700:sequence-specific DNA binding transcription factor activity|		|GO:0006355:regulation of transcription, DNA-dependent|
XLOC_014302	2[-]135466085-135479367	Capana02g001894,	3.88637	1.86207	1.06151	0.0478	0.996326	Up	vvi:100247033	51	1596	0	hypothetical protein LOC100247033		|%IPR001356:Homeobox domain :%IPR004022:DDT domain|	|GO:0003677:DNA binding|GO:0003700:sequence-specific DNA binding transcription factor activity|GO:0043565:sequence-specific DNA binding|		|GO:0006351:transcription, DNA-dependent|GO:0006355:regulation of transcription, DNA-dependent|
XLOC_014328	2[-]136781373-136782904	Capana02g001963,	3.34046	9.79755	-1.55238	0.01295	0.892621	Down	pop:POPTR_926270	50	206	2e-51	hypothetical protein
XLOC_014431	2[-]142334012-142334795	-	19.9796	50.7637	-1.34527	0.01605	0.941093	Down	rcu:RCOM_0903680	52	179	2e-43	hypothetical protein
XLOC_014432	2[-]142339330-142340106	Capana02g002238,	10.9123	33.2746	-1.60846	0.00505	0.671798	Down	pop:POPTR_786277	54	190	1e-46	hypothetical protein
XLOC_014445	2[-]142705522-142709951	Capana02g002266,	24.9125	12.3659	1.01051	0.03905	0.996326	Up	rcu:RCOM_1604380	41	263	1e-101	DNA binding protein, putative		|%IPR001005:SANT/Myb domain :%IPR006447:Myb domain, plants|	|GO:0003677:DNA binding|GO:0003682:chromatin binding|
XLOC_014464	2[-]143302313-143310418	Capana02g002329,	6.12659	2.64643	1.21104	0.0295	0.996326	Up	vvi:100247894	63	940	0	hypothetical protein LOC100247894		|%IPR005343:Nucleolar complex protein 2 :|
XLOC_014469	2[-]143642774-143651939	Capana02g002357,	3.24546	0.976779	1.73232	0.01255	0.892621	Up	vvi:100247441	59	1315	0	hypothetical protein LOC100247441		|%IPR000380:DNA topoisomerase, type IA :%IPR003601:DNA topoisomerase, type IA, domain 2|	|GO:0003677:DNA binding|GO:0003916:DNA topoisomerase activity|GO:0003917:DNA topoisomerase type I activity|	|GO:0005694:chromosome|	|GO:0006265:DNA topological change|
XLOC_014526	2[-]146928459-146930819	Capana02g002526,	3.66881	11.6183	-1.66301	0.00425	0.652331	Down	vvi:100259157	59	189	4e-46	hypothetical protein LOC100259157		|%IPR001763:Rhodanese-like domain :|
XLOC_014532	2[-]147137269-147143016	Capana02g002545,	13.6188	5.49601	1.30914	0.03675	0.996326	Up	vvi:100251269	64	535	1e-150	hypothetical protein LOC100251269		|%IPR006461:Uncharacterised protein family Cys-rich :|
XLOC_014539	2[-]147312860-147320885	Capana02g002561,	25.8369	12.2856	1.07247	0.04115	0.996326	Up	vvi:100247100	69	1619	0	hypothetical protein LOC100247100		|%IPR001789:Signal transduction response regulator, receiver domain :%IPR003594:Histidine kinase-like ATPase, ATP-binding domain|	|GO:0000155:phosphorelay sensor kinase activity|GO:0000156:phosphorelay response regulator activity|GO:0004871:signal transducer activity|GO:0005524:ATP binding|GO:0016772:transferase activity, transferring phosphorus-containing groups|	|GO:0016020:membrane|	|GO:0000160:phosphorelay signal transduction system|GO:0006355:regulation of transcription, DNA-dependent|GO:0007165:signal transduction|GO:0016310:phosphorylation|
XLOC_014570	2[-]148576334-148577940	Capana02g002649,	45.7515	98.737	-1.10977	0.0224	0.996326	Down	pop:POPTR_834449	78	571	1e-161	galactinol synthase (EC:2.4.1.123)		|%IPR002495:Glycosyl transferase, family 8 :|	|GO:0016757:transferase activity, transferring glycosyl groups|
XLOC_014574	2[-]148653438-148654683	Capana02g002654,	96.1289	203.597	-1.08268	0.0234	0.996326	Down	rcu:RCOM_0535510	46	99	6e-19	hypothetical protein
XLOC_014576	2[-]148699969-148702524	Capana02g002657,	4.92771	11.5833	-1.23305	0.03545	0.996326	Down	pop:POPTR_655260	69	283	2e-74	hypothetical protein		|%IPR000047:Helix-turn-helix motif :%IPR001356:Homeobox domain|	|GO:0000976:transcription regulatory region sequence-specific DNA binding|GO:0003677:DNA binding|GO:0003700:sequence-specific DNA binding transcription factor activity|GO:0043565:sequence-specific DNA binding|	|GO:0005634:nucleus|	|GO:0006355:regulation of transcription, DNA-dependent|
XLOC_014610	2[-]150215733-150217338	Capana02g002766,	0.259434	1.48632	-2.5183	0.0363	0.996326	Down	vvi:100257356	58	525	1e-147	hypothetical protein LOC100257356		|%IPR002213:UDP-glucuronosyl/UDP-glucosyltransferase :|	|GO:0016758:transferase activity, transferring hexosyl groups|		|GO:0008152:metabolic process|
XLOC_014613	2[-]150479013-150480089	Capana02g002777,	7.67557	2.35966	1.70169	0.0088	0.795842	Up	vvi:100261743	63	302	3e-80	hypothetical protein LOC100261743		|%IPR004883:Lateral organ boundaries, LOB :|
XLOC_014627	2[-]151041259-151043190	Capana02g002814,	238.839	482.602	-1.01479	0.0318	0.996326	Down	rcu:RCOM_1730280	80	692	0	Gamma-glutamyl-gamma-aminobutyrate hydrolase, putative		|%IPR011697:Peptidase C26 :%IPR017926:Glutamine amidotransferase|	|GO:0016787:hydrolase activity|		|GO:0006541:glutamine metabolic process|
XLOC_014743	2[-]155843872-155853613	Capana02g003106,	12.7248	6.19841	1.03767	0.0324	0.996326	Up	vvi:100266406	51	1917	0	hypothetical protein LOC100266406
XLOC_014788	2[-]157447876-157471905	Capana02g003223,Capana02g003224,	2.71143	0.493492	2.45796	0.00015	0.148885	Up	ath:AT3G02260	57	2434	0	BIG; BIG (BIG); binding / ubiquitin-protein ligase/ zinc ion binding; K10691 E3 ubiquitin-protein ligase UBR4 [EC:6.3.2.19]	|Genetic Information Processing; Folding, Sorting and Degradation; Ubiquitin system [BR:ko04121];|	|%IPR000433:Zinc finger, ZZ-type :%IPR003126:Zinc finger, N-recognin|	|GO:0004842:ubiquitin-protein ligase activity|GO:0008270:zinc ion binding|
XLOC_014837	2[-]159473333-159474812	Capana02g003352,	2.84394	7.2711	-1.35428	0.0248	0.996326	Down	vvi:100250998	57	390	1e-107	hypothetical protein LOC100250998		|%IPR003441:NAC domain :|	|GO:0003677:DNA binding|		|GO:0006355:regulation of transcription, DNA-dependent|
XLOC_014845	2[-]159713057-159717582	Capana02g003366,	4.14512	9.86308	-1.25062	0.0287	0.996326	Down	vvi:100266209	41	336	7e-90	hypothetical protein LOC100266209
XLOC_014852	2[-]159866195-159870884	Capana02g003376,	14.5075	6.15325	1.23738	0.0192	0.996326	Up	vvi:100254227	88	1320	0	hypothetical protein; K03869 cullin 3	|Genetic Information Processing; Folding, Sorting and Degradation; Ubiquitin mediated proteolysis [PATH:ko04120-Map:ko04120];|Genetic Information Processing; Folding, Sorting and Degradation; Ubiquitin system [BR:ko04121];|	|%IPR001373:Cullin, N-terminal :%IPR011991:Winged helix-turn-helix DNA-binding domain|	|GO:0031625:ubiquitin protein ligase binding|	|GO:0031461:cullin-RING ubiquitin ligase complex|	|GO:0006511:ubiquitin-dependent protein catabolic process|
XLOC_014969	2[-]163357455-163359251	Capana02g003661,	8.3806	23.2782	-1.47385	0.01175	0.88802	Down	vvi:100263502	75	188	3e-46	hypothetical protein LOC100263502		|%IPR003657:DNA-binding WRKY :|	|GO:0003700:sequence-specific DNA binding transcription factor activity|GO:0043565:sequence-specific DNA binding|		|GO:0006355:regulation of transcription, DNA-dependent|
XLOC_014987	2[.]3509306-3511060	-	4.66122	12.055	-1.37085	0.0133	0.896005	Down
XLOC_014989	2[.]5097541-5098555	-	7.62704	17.3726	-1.18762	0.03435	0.996326	Down	rcu:RCOM_0612990	37	73.6	2e-11	hypothetical protein
XLOC_014990	2[.]6336432-6337959	-	0.752471	3.16829	-2.074	0.006	0.687162	Down
XLOC_015009	2[.]17632336-17635128	-	1.44018	3.42794	-1.2511	0.0347	0.996326	Down
XLOC_015032	2[.]50161649-50162333	-	10.4991	38.3154	-1.86766	0.00175	0.466075	Down	vvi:100250550	48	90.5	9e-17	hypothetical protein LOC100250550
XLOC_015041	2[.]61305068-61305975	-	2.84599	0.000783737	11.8263	0.031	0.996326	Up
XLOC_015043	2[.]62253512-62254591	-	20.8476	57.7705	-1.47046	0.00485	0.671798	Down	rcu:RCOM_0612990	39	77.4	2e-12	hypothetical protein
XLOC_015049	2[.]65429311-65429895	-	0	1.00809	-inf	0.0011	0.36803	Down
XLOC_015079	2[.]85671843-85674819	-	2.93669	6.60766	-1.16995	0.0346	0.996326	Down
XLOC_015105	2[.]94565660-94568262	-	2.62333e-05	0.51471	-14.2601	0.0284	0.996326	Down
XLOC_015165	2[.]121211490-121212134	-	0.702668	0	inf	0.00385	0.639234	Up	rcu:RCOM_0770710	79	75.9	2e-12	peptidase, putative (EC:3.4.21.25)
XLOC_015178	2[.]125720180-125720636	-	3.53307	9.80614	-1.47276	0.0464	0.996326	Down	pop:POPTR_758701	50	76.3	7e-13	hypothetical protein
XLOC_015206	2[.]133669240-133670242	-	16.9242	3.77588	2.1642	0.00025	0.212693	Up
XLOC_015227	2[.]136182967-136183761	-	0.48377	0	inf	0.00555	0.671798	Up
XLOC_015229	2[.]136374127-136374678	-	5.89746	1.30004	2.18154	0.0312	0.996326	Up
XLOC_015243	2[.]137812986-137814095	-	33.8916	79.7435	-1.23444	0.01315	0.896005	Down
XLOC_015244	2[.]137838937-137839796	-	66.8424	160.872	-1.26708	0.0099	0.830401	Down
XLOC_015250	2[.]138978736-138979253	-	1.13942	0	inf	0.0018	0.466075	Up
XLOC_015270	2[.]142258276-142259808	-	0.639564	2.24056	-1.8087	0.0235	0.996326	Down
XLOC_015330	2[.]154332230-154332913	-	56.0179	184.366	-1.71861	0.0008	0.340309	Down
XLOC_015360	2[.]157705357-157708228	-	0.244088	0.809967	-1.73046	0.04355	0.996326	Down
XLOC_015383	2[.]158984513-158985443	-	1.86366	4.94529	-1.40792	0.03985	0.996326	Down
XLOC_015390	2[.]159684951-159685251	-	0	2.83961	-inf	0.00345	0.639234	Down
XLOC_015392	2[.]159739480-159740268	-	1.67124	0.000133947	13.607	0.04895	0.996326	Up	vvi:100262881	63	126	1e-27	hypothetical protein LOC100262881		|%IPR006456:ZF-HD homeobox protein, Cys/His-rich dimerisation domain :|
XLOC_015400	2[.]160490059-160490912	-	20.3585	45.8324	-1.17074	0.02855	0.996326	Down
XLOC_015425	2[.]163277451-163278346	-	0.00097913	9.36065	-13.2228	0.0186	0.996326	Down	pop:POPTR_549717	68	104	1e-20	hypothetical protein
XLOC_015452	3[+]802982-807867	Capana03g000053,	10.2349	4.84137	1.08002	0.0386	0.996326	Up	vvi:100256619	60	694	0	hypothetical protein LOC100256619		|%IPR001611:Leucine-rich repeat :%IPR003591:Leucine-rich repeat, typical subtype|	|GO:0005515:protein binding|
XLOC_015473	3[+]1604164-1606731	Capana03g000117,	126.076	34.8169	1.85644	0.00025	0.212693	Up	pop:POPTR_739192	34	127	3e-27	hypothetical protein; K13464 jasmonate ZIM domain-containing protein	|Environmental Information Processing; Signal Transduction; Plant hormone signal transduction [PATH:ko04075-Map:ko04075];|Organismal Systems; Environmental Adaptation; Plant-pathogen interaction [PATH:ko04626-Map:ko04626];|	|%IPR010399:Tify :%IPR018467:CO/COL/TOC1, conserved site|
XLOC_015518	3[+]3170146-3170734	-	5.43344	14.0581	-1.37147	0.0384	0.996326	Down	rcu:RCOM_1487280	60	82.8	8e-15	hypothetical protein
XLOC_015645	3[+]7502035-7504494	Capana03g000542,Capana03g000543,	1.65023	0.367985	2.16495	0.0079	0.756393	Up	pop:POPTR_758009	62	563	0	hypothetical protein		|%IPR000719:Protein kinase domain :%IPR002290:Serine/threonine- / dual specificity protein kinase, catalytic domain|	|GO:0004672:protein kinase activity|GO:0004674:protein serine/threonine kinase activity|GO:0004713:protein tyrosine kinase activity|GO:0005524:ATP binding|GO:0016772:transferase activity, transferring phosphorus-containing groups|		|GO:0006468:protein phosphorylation|
XLOC_015696	3[+]10280864-10282785	Capana03g000696,	0.348246	2.02066	-2.53665	0.02305	0.996326	Down	vvi:100242243	50	289	4e-76	hypothetical protein LOC100242243; K09422 myb proto-oncogene protein, plant	|Genetic Information Processing; Transcription; Transcription factors [BR:ko03000];|	|%IPR001005:SANT/Myb domain :%IPR009057:Homeodomain-like|	|GO:0003677:DNA binding|GO:0003682:chromatin binding|
XLOC_015740	3[+]12008952-12009978	Capana03g000795,	31.5867	87.7657	-1.47434	0.0046	0.671798	Down	pop:POPTR_1105285	36	119	5e-25	hypothetical protein		|%IPR002048:EF-hand domain :%IPR011992:EF-hand domain pair|	|GO:0005509:calcium ion binding|
XLOC_015741	3[+]12017151-12018651	Capana03g000796,	2.05351	5.00858	-1.28631	0.0401	0.996326	Down	pop:POPTR_585516	42	235	5e-60	hypothetical protein		|%IPR001841:Zinc finger, RING-type :%IPR002867:Zinc finger, C6HC-type|	|GO:0005515:protein binding|GO:0008270:zinc ion binding|
XLOC_015755	3[+]12572902-12596435	Capana03g000838,Capana03g000839,	3.78442	1.79937	1.07258	0.0432	0.996326	Up	vvi:100265641	40	1177	0	hypothetical protein LOC100265641
XLOC_015783	3[+]15035563-15037373	Capana03g000932,	5.98427	16.5053	-1.46368	0.0113	0.880127	Down	ath:AT3G25540	62	232	1e-94	LAG1; LAG1		|%IPR006634:TRAM/LAG1/CLN8 homology domain :|		|GO:0016021:integral to membrane|
XLOC_015804	3[+]16378636-16387537	Capana03g000988,	7.18045	3.19588	1.16786	0.02765	0.996326	Up	vvi:100260325	67	1518	0	hypothetical protein LOC100260325		|%IPR000504:RNA recognition motif domain :%IPR007855:RNA-dependent RNA polymerase, eukaryotic-type|	|GO:0000166:nucleotide binding|GO:0003676:nucleic acid binding|GO:0003968:RNA-directed RNA polymerase activity|
XLOC_015886	3[+]20612342-20613291	Capana03g001223,	53.88	131.889	-1.2915	0.00995	0.83176	Down
XLOC_015936	3[+]26912460-26948836	Capana03g001422,	5.92265	2.60887	1.18282	0.0239	0.996326	Up	rcu:RCOM_0419570	53	2130	0	hypothetical protein
XLOC_015943	3[+]27246263-27257690	Capana03g001452,	2.67535	0.917431	1.54406	0.0148	0.929746	Up	vvi:100260316	40	493	1e-137	hypothetical protein LOC100260316		|%IPR001005:SANT/Myb domain :%IPR005707:Ribosomal protein S2, eukaryotic/archaeal|	|GO:0003677:DNA binding|GO:0003682:chromatin binding|GO:0003735:structural constituent of ribosome|	|GO:0005840:ribosome|GO:0015935:small ribosomal subunit|	|GO:0006412:translation|
XLOC_015948	3[+]27573470-27575023	-	2.37788	11.9621	-2.33072	0.0002	0.186106	Down
XLOC_015955	3[+]27994053-27994971	Capana03g001486,	0.769894	7.23312	-3.23189	0.00295	0.614281	Down	vvi:100255885	49	184	5e-45	hypothetical protein LOC100255885		|%IPR002160:Proteinase inhibitor I3, Kunitz legume :%IPR011065:Kunitz inhibitor ST1-like|	|GO:0004866:endopeptidase inhibitor activity|
XLOC_015968	3[+]28483474-28494514	Capana03g001520,Capana03g001521,	6.74665	3.12666	1.10955	0.0358	0.996326	Up	vvi:100255903	72	1692	0	hypothetical protein LOC100255903		|%IPR000719:Protein kinase domain :%IPR002290:Serine/threonine- / dual specificity protein kinase, catalytic domain|	|GO:0004672:protein kinase activity|GO:0004674:protein serine/threonine kinase activity|GO:0004713:protein tyrosine kinase activity|GO:0005524:ATP binding|GO:0016772:transferase activity, transferring phosphorus-containing groups|		|GO:0006468:protein phosphorylation|
XLOC_015998	3[+]30712153-30714959	Capana03g001614,	37.1611	116.771	-1.65181	0.001	0.36803	Down	rcu:RCOM_1445550	80	585	1e-165	mitochondrial phosphate carrier protein, putative		|%IPR018108:Mitochondrial substrate/solute carrier :%IPR023395:Mitochondrial carrier domain|
XLOC_016033	3[+]34068045-34074019	Capana03g001734,Capana03g001735,	8.44728	3.89897	1.11539	0.04285	0.996326	Up	vvi:100266545	81	1023	0	hypothetical protein LOC100266545		|%IPR003593:AAA+ ATPase domain :%IPR003959:ATPase, AAA-type, core|	|GO:0000166:nucleotide binding|GO:0005524:ATP binding|GO:0017111:nucleoside-triphosphatase activity|
XLOC_016041	3[+]34891797-34894517	Capana03g001772,	623.417	1295.86	-1.05564	0.02455	0.996326	Down	rcu:RCOM_1323920	57	130	8e-29	hypothetical protein
XLOC_016060	3[+]36740094-36741541	Capana03g001838,	3.76174	10.4167	-1.46942	0.01195	0.891836	Down	rcu:RCOM_0774930	70	261	1e-120	Lignin-forming anionic peroxidase precursor, putative (EC:1.11.1.7); K00430 peroxidase [EC:1.11.1.7]	|Metabolism; Amino Acid Metabolism; Phenylalanine metabolism [PATH:ko00360-Map:ko00360];|Metabolism; Biosynthesis of Other Secondary Metabolites; Phenylpropanoid biosynthesis [PATH:ko00940-Map:ko00940];|Metabolism; Energy Metabolism; Methane metabolism [PATH:ko00680-Map:ko00680];|	|%IPR000823:Plant peroxidase :%IPR002016:Haem peroxidase, plant/fungal/bacterial|	|GO:0004601:peroxidase activity|GO:0020037:heme binding|		|GO:0006979:response to oxidative stress|GO:0055114:oxidation-reduction process|
XLOC_016090	3[+]39558224-39560137	Capana03g001944,	7.09204	18.9266	-1.41615	0.0094	0.816046	Down	rcu:RCOM_1379730	62	602	1e-170	ATP binding protein, putative		|%IPR003593:AAA+ ATPase domain :%IPR003959:ATPase, AAA-type, core|	|GO:0000166:nucleotide binding|GO:0005524:ATP binding|GO:0017111:nucleoside-triphosphatase activity|
XLOC_016094	3[+]39893702-39896422	-	154.481	321.494	-1.05736	0.02935	0.996326	Down	vvi:100252122	62	142	1e-32	hypothetical protein LOC100252122		|%IPR004910:Yippee/Mis18 :|
XLOC_016100	3[+]40535338-40540917	Capana03g001972,	2.65997	1.06045	1.32674	0.0333	0.996326	Up	vvi:100245187	57	800	0	hypothetical protein LOC100245187		|%IPR001680:WD40 repeat :%IPR015943:WD40/YVTN repeat-like-containing domain|	|GO:0005515:protein binding|
XLOC_016119	3[+]41439395-41441703	Capana03g002016,	13.2875	5.37728	1.30513	0.0151	0.930531	Up	vvi:100241722	67	858	0	hypothetical protein LOC100241722		|%IPR002885:Pentatricopeptide repeat :%IPR011990:Tetratricopeptide-like helical|	|GO:0005515:protein binding|
XLOC_016126	3[+]42427725-42429372	Capana03g002038,	39.4985	79.7241	-1.01322	0.03895	0.996326	Down	pop:POPTR_751199	49	340	1e-91	hypothetical protein		|%IPR002921:Lipase, class 3 :|	|GO:0004806:triglyceride lipase activity|		|GO:0006629:lipid metabolic process|
XLOC_016150	3[+]47139333-47147952	Capana03g002111,	23.2893	7.95079	1.5505	0.0023	0.555365	Up	rcu:RCOM_1581520	73	1224	0	ATP binding protein, putative (EC:3.6.4.3)		|%IPR003593:AAA+ ATPase domain :%IPR003959:ATPase, AAA-type, core|	|GO:0000166:nucleotide binding|GO:0005524:ATP binding|GO:0017111:nucleoside-triphosphatase activity|
XLOC_016193	3[+]59883324-59885772	Capana03g002310,	4.32173	10.0383	-1.21583	0.04895	0.996326	Down	pop:POPTR_570458	63	279	3e-73	hypothetical protein		|%IPR010908:Longin domain :%IPR011012:Longin-like domain|			|GO:0006810:transport|
XLOC_016275	3[+]93204501-93207560	Capana03g002635,	12.8747	46.3417	-1.84777	0.0008	0.340309	Down	vvi:100258754	42	172	5e-41	hypothetical protein LOC100258754		|%IPR003657:DNA-binding WRKY :|	|GO:0003700:sequence-specific DNA binding transcription factor activity|GO:0043565:sequence-specific DNA binding|		|GO:0006355:regulation of transcription, DNA-dependent|
XLOC_016282	3[+]99504283-99505687	Capana03g002680,	36.9656	127.402	-1.78514	0.00055	0.287322	Down	vvi:100246003	49	181	7e-44	hypothetical protein LOC100246003; K09422 myb proto-oncogene protein, plant	|Genetic Information Processing; Transcription; Transcription factors [BR:ko03000];|	|%IPR001005:SANT/Myb domain :%IPR009057:Homeodomain-like|	|GO:0003677:DNA binding|GO:0003682:chromatin binding|
XLOC_016292	3[+]103716400-103754574	Capana03g002732,	3.13701	1.14113	1.45893	0.00725	0.739361	Up	rcu:RCOM_1501550	51	2075	0	hypothetical protein; K14550 U3 small nucleolar RNA-associated protein 10	|Genetic Information Processing; Translation; Ribosome Biogenesis [BR:ko03009];|Genetic Information Processing; Translation; Ribosome biogenesis in eukaryotes [PATH:ko03008-Map:ko03008];|	|%IPR012954:BP28, C-terminal domain :%IPR016024:Armadillo-type fold|	|GO:0005488:binding|
XLOC_016400	3[+]194863029-194865523	Capana03g003212,	12.6408	4.85553	1.38038	0.0207	0.996326	Up	vvi:100260599	92	513	1e-144	hypothetical protein LOC100260599; K08914 light-harvesting complex II chlorophyll a/b binding protein 3	|Metabolism; Energy Metabolism; Photosynthesis - antenna proteins [PATH:ko00196-Map:ko00196];|Metabolism; Energy Metabolism; Photosynthesis proteins [BR:ko00194];|	|%IPR001344:Chlorophyll A-B binding protein, plant :%IPR022796:Chlorophyll A-B binding protein|		|GO:0016020:membrane|	|GO:0009765:photosynthesis, light harvesting|
XLOC_016405	3[+]195868820-195879001	Capana03g003224,	7.65584	3.14318	1.28434	0.0097	0.827613	Up	rcu:RCOM_0646230	45	1516	0	ATP binding protein, putative		|%IPR011684:KIP1-like :|
XLOC_016414	3[+]200017316-200019883	Capana03g003258,	128.185	260.992	-1.02579	0.0305	0.996326	Down	vvi:100264658	60	330	2e-88	hypothetical protein LOC100264658		|%IPR004331:SPX, N-terminal :|
XLOC_016443	3[+]216637051-216640040	Capana03g003391,	5.24191	11.7418	-1.1635	0.0323	0.996326	Down	rcu:RCOM_1417690	56	584	1e-165	cytochrome P450, putative (EC:1.14.13.21)		|%IPR001128:Cytochrome P450 :%IPR002401:Cytochrome P450, E-class, group I|	|GO:0005506:iron ion binding|GO:0009055:electron carrier activity|GO:0016705:oxidoreductase activity, acting on paired donors, with incorporation or reduction of molecular oxygen|GO:0020037:heme binding|		|GO:0055114:oxidation-reduction process|
XLOC_016459	3[+]222246867-222247893	Capana03g003448,	8.56491	24.2387	-1.5008	0.0107	0.851909	Down
XLOC_016462	3[+]222599179-222600101	Capana03g003453,	5.33031	12.4976	-1.22936	0.03625	0.996326	Down
XLOC_016484	3[+]228107489-228111851	-	7.1396	15.9132	-1.15631	0.04635	0.996326	Down
XLOC_016559	3[+]237989362-237998234	Capana03g003786,Capana03g003787,	4.02694	1.43021	1.49345	0.00665	0.73887	Up	pop:POPTR_566205	48	1593	0	hypothetical protein		|%IPR011684:KIP1-like :|
XLOC_016613	3[+]243560406-243564337	Capana03g003983,	5.57561	2.18233	1.35326	0.02735	0.996326	Up	rcu:RCOM_1022390	81	838	0	Leucine-rich repeat receptor protein kinase EXS precursor, putative (EC:2.7.10.1 1.3.1.74)		|%IPR000719:Protein kinase domain :%IPR001611:Leucine-rich repeat|	|GO:0004672:protein kinase activity|GO:0004674:protein serine/threonine kinase activity|GO:0004713:protein tyrosine kinase activity|GO:0005515:protein binding|GO:0005524:ATP binding|GO:0016772:transferase activity, transferring phosphorus-containing groups|		|GO:0006468:protein phosphorylation|
XLOC_016615	3[+]243666364-243668739	Capana03g003991,	4.17806	16.5071	-1.98218	0.0058	0.682635	Down	pop:POPTR_563193	67	417	1e-115	hypothetical protein		|%IPR005299:SAM dependent carboxyl methyltransferase :|	|GO:0008168:methyltransferase activity|
XLOC_016634	3[+]245824468-245847681	Capana03g004095,	0.560904	0	inf	0.00555	0.671798	Up	vvi:100255444	64	1471	0	hypothetical protein LOC100255444		|%IPR011989:Armadillo-like helical :%IPR016024:Armadillo-type fold|	|GO:0005488:binding|
XLOC_016669	3[+]248925728-248929496	Capana03g004216,	2.21386	0.925359	1.25848	0.041	0.996326	Up	vvi:100251509	71	1457	0	hypothetical protein LOC100251509		|%IPR000719:Protein kinase domain :%IPR001611:Leucine-rich repeat|	|GO:0004672:protein kinase activity|GO:0004713:protein tyrosine kinase activity|GO:0005515:protein binding|GO:0005524:ATP binding|GO:0016772:transferase activity, transferring phosphorus-containing groups|		|GO:0006468:protein phosphorylation|
XLOC_016705	3[+]251296963-251320099	Capana03g004337,Capana03g004338,	1.5691	0.576698	1.44405	0.01315	0.896005	Up	rcu:RCOM_1018430	47	1909	0	hypothetical protein
XLOC_016766	3[+]256272284-256273040	Capana03g004526,	23.2988	56.2095	-1.27056	0.01605	0.941093	Down	rcu:RCOM_0492200	49	94.4	7e-18	ATBET12, putative
XLOC_016798	3[+]260160555-260161419	Capana03g004603,	8.638	20.7896	-1.2671	0.0268	0.996326	Down	ath:AT1G05760	35	101	7e-20	RTM1; RTM1 (restricted tev movement 1); sugar binding		|%IPR001229:Mannose-binding lectin :|
XLOC_016803	3[+]260703153-260706728	Capana03g004620,	16.8012	39.9506	-1.24965	0.0192	0.996326	Down	vvi:100244152	89	270	1e-70	hypothetical protein LOC100244152; K13448 calcium-binding protein CML	|Organismal Systems; Environmental Adaptation; Plant-pathogen interaction [PATH:ko04626-Map:ko04626];|	|%IPR002048:EF-hand domain :%IPR011992:EF-hand domain pair|	|GO:0005509:calcium ion binding|
XLOC_016807	3[+]261275261-261283404	Capana03g004637,	5.07718	2.28573	1.15137	0.03875	0.996326	Up	vvi:100244311	88	1785	0	hypothetical protein LOC100244311; K11593 eukaryotic translation initiation factor 2C	|Genetic Information Processing; Replication and Repair; Chromosome [BR:ko03036];|	|%IPR003100:Argonaute/Dicer protein, PAZ :%IPR003165:Stem cell self-renewal protein Piwi|	|GO:0003676:nucleic acid binding|GO:0005515:protein binding|
XLOC_016839	3[-]1087916-1098126	Capana03g000080,Capana03g000081,	5.78546	2.377	1.28329	0.02245	0.996326	Up	pop:POPTR_1117374	62	1170	0	hypothetical protein		|%IPR005612:CCAAT-binding factor :%IPR016024:Armadillo-type fold|	|GO:0005488:binding|
XLOC_016845	3[-]1249792-1251502	Capana03g000091,	79.4222	177.38	-1.15923	0.0173	0.971966	Down	rcu:RCOM_0234260	41	106	2e-21	hypothetical protein
XLOC_016886	3[-]2705966-2708035	-	132.88	272.051	-1.03375	0.02875	0.996326	Down	vvi:100242977	71	407	1e-111	hypothetical protein LOC100242977; K13248 pyridoxal phosphate phosphatase PHOSPHO2 [EC:3.1.3.74]	|Metabolism; Metabolism of Cofactors and Vitamins; Vitamin B6 metabolism [PATH:ko00750-Map:ko00750];|	|%IPR006383:HAD-superfamily hydrolase, subfamily IB, PSPase-like :%IPR006384:Pyridoxal phosphate phosphatase-related|	|GO:0016791:phosphatase activity|		|GO:0008152:metabolic process|
XLOC_016933	3[-]4771987-4778175	Capana03g000346,	5.31636	2.27398	1.22522	0.0287	0.996326	Up	pop:POPTR_817077	83	962	0	hypothetical protein; K14558 periodic tryptophan protein 2	|Genetic Information Processing; Translation; Ribosome Biogenesis [BR:ko03009];|Genetic Information Processing; Translation; Ribosome biogenesis in eukaryotes [PATH:ko03008-Map:ko03008];|	|%IPR001680:WD40 repeat :%IPR007148:Small-subunit processome, Utp12|	|GO:0005515:protein binding|
XLOC_016970	3[-]6501358-6503466	Capana03g000473,	52.7268	176.795	-1.74547	0.0011	0.36803	Down	vvi:100253480	52	337	2e-90	hypothetical protein LOC100253480		|%IPR003657:DNA-binding WRKY :|	|GO:0003700:sequence-specific DNA binding transcription factor activity|GO:0043565:sequence-specific DNA binding|		|GO:0006355:regulation of transcription, DNA-dependent|
XLOC_017018	3[-]8297937-8307397	Capana03g000594,	11.8569	24.4994	-1.04702	0.0427	0.996326	Down	vvi:100243589	46	555	1e-156	hypothetical protein LOC100243589
XLOC_017041	3[-]9196777-9199861	Capana03g000646,	0.978929	0.354246	1.46645	0.04685	0.996326	Up	vvi:100253986	67	1135	0	hypothetical protein LOC100253986		|%IPR002885:Pentatricopeptide repeat :%IPR011990:Tetratricopeptide-like helical|	|GO:0005515:protein binding|
XLOC_017096	3[-]11943546-11945541	Capana03g000791,	29.6355	12.8276	1.20807	0.01725	0.970989	Up	vvi:100243277	86	810	0	hypothetical protein LOC100243277; K10960 geranylgeranyl reductase [EC:1.3.1.83]	|Metabolism; Metabolism of Cofactors and Vitamins; Porphyrin and chlorophyll metabolism [PATH:ko00860-Map:ko00860];|Metabolism; Metabolism of Terpenoids and Polyketides; Terpenoid backbone biosynthesis [PATH:ko00900-Map:ko00900];|	|%IPR003042:Aromatic-ring hydroxylase-like :%IPR010253:Geranylgeranyl reductase, plant/prokaryotic|	|GO:0016491:oxidoreductase activity|GO:0016628:oxidoreductase activity, acting on the CH-CH group of donors, NAD or NADP as acceptor|GO:0045550:geranylgeranyl reductase activity|		|GO:0008152:metabolic process|GO:0015979:photosynthesis|GO:0015995:chlorophyll biosynthetic process|GO:0051188:cofactor biosynthetic process|GO:0055114:oxidation-reduction process|
XLOC_017098	3[-]12026194-12027528	Capana03g000797,	3.98375	1.25207	1.66981	0.0297	0.996326	Up	vvi:100232934	90	470	1e-131	LHCA1; chlorophyll a/b-binding protein; K08910 light-harvesting complex I chlorophyll a/b binding protein 4	|Metabolism; Energy Metabolism; Photosynthesis - antenna proteins [PATH:ko00196-Map:ko00196];|Metabolism; Energy Metabolism; Photosynthesis proteins [BR:ko00194];|	|%IPR001344:Chlorophyll A-B binding protein, plant :%IPR022796:Chlorophyll A-B binding protein|		|GO:0016020:membrane|	|GO:0009765:photosynthesis, light harvesting|
XLOC_017137	3[-]14093434-14098972	Capana03g000892,	4.29693	9.74117	-1.18079	0.0363	0.996326	Down	vvi:100232999	75	781	0	F3'H, VvF3'h4; flavonoid 3' hydroxylase; K05280 flavonoid 3'-monooxygenase [EC:1.14.13.21]	|Metabolism; Biosynthesis of Other Secondary Metabolites; Flavone and flavonol biosynthesis [PATH:ko00944-Map:ko00944];|Metabolism; Biosynthesis of Other Secondary Metabolites; Flavonoid biosynthesis [PATH:ko00941-Map:ko00941];|Metabolism; Enzyme Families; Cytochrome P450 [BR:ko00199];|	|%IPR001128:Cytochrome P450 :%IPR002401:Cytochrome P450, E-class, group I|	|GO:0005506:iron ion binding|GO:0009055:electron carrier activity|GO:0016705:oxidoreductase activity, acting on paired donors, with incorporation or reduction of molecular oxygen|GO:0020037:heme binding|		|GO:0055114:oxidation-reduction process|
XLOC_017150	3[-]15020553-15021413	Capana03g000930,	4.71137	13.9486	-1.5659	0.0104	0.843817	Down	rcu:RCOM_0877440	43	73.9	1e-11	hypothetical protein
XLOC_017170	3[-]16271579-16272376	Capana03g000982,	47.5174	15.5457	1.61194	0.00355	0.639234	Up	rcu:RCOM_0534830	28	90.1	2e-16	ATP binding protein, putative
XLOC_017209	3[-]18509684-18510933	Capana03g001088,	2.26186	6.39098	-1.49853	0.02625	0.996326	Down	pop:POPTR_569990	40	189	2e-46	porin/voltage-dependent anion-selective channel protein		|%IPR023614:Porin domain :%IPR027246:Eukaryotic porin/Tom40|		|GO:0005741:mitochondrial outer membrane|	|GO:0055085:transmembrane transport|
XLOC_017270	3[-]21755962-21756812	-	3.72064	11.7058	-1.65359	0.0247	0.996326	Down							|%IPR003614:Knottin, scorpion toxin-like :%IPR008176:Gamma thionin|			|GO:0006952:defense response|
XLOC_017286	3[-]22694779-22697965	Capana03g001296,	5.20815	11.4271	-1.13362	0.0418	0.996326	Down	rcu:RCOM_1507810	69	504	1e-141	protein binding protein, putative		|%IPR000197:Zinc finger, TAZ-type :%IPR000210:BTB/POZ-like|	|GO:0003712:transcription cofactor activity|GO:0004402:histone acetyltransferase activity|GO:0005515:protein binding|GO:0008270:zinc ion binding|	|GO:0005634:nucleus|	|GO:0006355:regulation of transcription, DNA-dependent|
XLOC_017287	3[-]22735645-22738015	Capana03g001297,	15.345	5.24778	1.54799	0.0069	0.739361	Up	pop:POPTR_575272	85	736	0	hypothetical protein; K01728 pectate lyase [EC:4.2.2.2]	|Metabolism; Carbohydrate Metabolism; Pentose and glucuronate interconversions [PATH:ko00040-Map:ko00040];|	|%IPR002022:Pectate lyase/Amb allergen :%IPR011050:Pectin lyase fold/virulence factor|
XLOC_017317	3[-]24982575-24984504	Capana03g001377,	41.6863	88.5438	-1.08682	0.0258	0.996326	Down	vvi:100245827	63	651	0	hypothetical protein LOC100245827		|%IPR001128:Cytochrome P450 :%IPR002403:Cytochrome P450, E-class, group IV|	|GO:0004497:monooxygenase activity|GO:0005506:iron ion binding|GO:0009055:electron carrier activity|GO:0016705:oxidoreductase activity, acting on paired donors, with incorporation or reduction of molecular oxygen|GO:0020037:heme binding|		|GO:0055114:oxidation-reduction process|
XLOC_017347	3[-]27753678-27754926	Capana03g001469,	25.7369	62.4868	-1.27971	0.01425	0.915723	Down							|%IPR003465:Proteinase inhibitor I20, Pin2 :|	|GO:0004867:serine-type endopeptidase inhibitor activity|
XLOC_017349	3[-]28063839-28065446	Capana03g001488,	2.5806	10.5233	-2.02781	0.00235	0.555365	Down	vvi:100242398	34	105	4e-21	hypothetical protein LOC100242398		|%IPR002160:Proteinase inhibitor I3, Kunitz legume :%IPR011065:Kunitz inhibitor ST1-like|	|GO:0004866:endopeptidase inhibitor activity|
XLOC_017350	3[-]28159842-28162175	Capana03g001494,	24.3455	50.1287	-1.04198	0.04115	0.996326	Down	vvi:100264685	64	269	2e-70	hypothetical protein LOC100264685		|%IPR004182:GRAM domain :|
XLOC_017373	3[-]30456729-30458829	Capana03g001595,	14.9495	41.7213	-1.48068	0.0053	0.671798	Down	rcu:RCOM_0208740	68	462	1e-128	Tartrate-resistant acid phosphatase type 5 precursor, putative (EC:3.1.3.2)		|%IPR004843:Phosphoesterase domain :%IPR024927:Acid phosphatase, type 5|	|GO:0003993:acid phosphatase activity|GO:0016787:hydrolase activity|
XLOC_017389	3[-]32236585-32239768	-	21.1647	43.5447	-1.04084	0.0458	0.996326	Down	vvi:100248489	36	148	3e-33	hypothetical protein LOC100248489
XLOC_017392	3[-]32416729-32423292	Capana03g001670,	10.7784	5.15873	1.06306	0.04625	0.996326	Up	vvi:100245819	52	522	1e-146	hypothetical protein LOC100245819		|%IPR009057:Homeodomain-like :%IPR014876:DEK, C-terminal|	|GO:0003677:DNA binding|
XLOC_017408	3[-]33856231-33875319	Capana03g001714,	13.2949	4.7284	1.49144	0.005	0.671798	Up	vvi:100252767	70	1287	0	hypothetical protein LOC100252767; K14555 U3 small nucleolar RNA-associated protein 13	|Genetic Information Processing; Translation; Ribosome Biogenesis [BR:ko03009];|Genetic Information Processing; Translation; Ribosome biogenesis in eukaryotes [PATH:ko03008-Map:ko03008];|	|%IPR001680:WD40 repeat :%IPR013934:Small-subunit processome, Utp13|	|GO:0005515:protein binding|	|GO:0032040:small-subunit processome|	|GO:0006364:rRNA processing|
XLOC_017430	3[-]35054243-35057070	Capana03g001779,	13.2573	5.06312	1.38869	0.0132	0.896005	Up	pop:POPTR_775614	68	418	1e-115	hypothetical protein
XLOC_017454	3[-]36645076-36646510	Capana03g001834,	5.81015	14.0622	-1.27518	0.0266	0.996326	Down	rcu:RCOM_0774930	71	456	1e-126	Lignin-forming anionic peroxidase precursor, putative (EC:1.11.1.7); K00430 peroxidase [EC:1.11.1.7]	|Metabolism; Amino Acid Metabolism; Phenylalanine metabolism [PATH:ko00360-Map:ko00360];|Metabolism; Biosynthesis of Other Secondary Metabolites; Phenylpropanoid biosynthesis [PATH:ko00940-Map:ko00940];|Metabolism; Energy Metabolism; Methane metabolism [PATH:ko00680-Map:ko00680];|	|%IPR000823:Plant peroxidase :%IPR002016:Haem peroxidase, plant/fungal/bacterial|	|GO:0004601:peroxidase activity|GO:0020037:heme binding|		|GO:0006979:response to oxidative stress|GO:0055114:oxidation-reduction process|
XLOC_017455	3[-]36671202-36672637	Capana03g001836,	4.24368	9.85342	-1.21531	0.0385	0.996326	Down	rcu:RCOM_0774930	70	447	1e-124	Lignin-forming anionic peroxidase precursor, putative (EC:1.11.1.7); K00430 peroxidase [EC:1.11.1.7]	|Metabolism; Amino Acid Metabolism; Phenylalanine metabolism [PATH:ko00360-Map:ko00360];|Metabolism; Biosynthesis of Other Secondary Metabolites; Phenylpropanoid biosynthesis [PATH:ko00940-Map:ko00940];|Metabolism; Energy Metabolism; Methane metabolism [PATH:ko00680-Map:ko00680];|	|%IPR000823:Plant peroxidase :%IPR002016:Haem peroxidase, plant/fungal/bacterial|	|GO:0004601:peroxidase activity|GO:0020037:heme binding|		|GO:0006979:response to oxidative stress|GO:0055114:oxidation-reduction process|
XLOC_017456	3[-]36721061-36722486	Capana03g001837,	2.53757	10.3033	-2.02158	0.001	0.36803	Down	rcu:RCOM_0774930	71	360	1e-119	Lignin-forming anionic peroxidase precursor, putative (EC:1.11.1.7); K00430 peroxidase [EC:1.11.1.7]	|Metabolism; Amino Acid Metabolism; Phenylalanine metabolism [PATH:ko00360-Map:ko00360];|Metabolism; Biosynthesis of Other Secondary Metabolites; Phenylpropanoid biosynthesis [PATH:ko00940-Map:ko00940];|Metabolism; Energy Metabolism; Methane metabolism [PATH:ko00680-Map:ko00680];|	|%IPR000823:Plant peroxidase :%IPR002016:Haem peroxidase, plant/fungal/bacterial|	|GO:0004601:peroxidase activity|GO:0020037:heme binding|		|GO:0006979:response to oxidative stress|GO:0055114:oxidation-reduction process|
XLOC_017460	3[-]37052723-37055118	Capana03g001852,	39.3401	110.617	-1.4915	0.0029	0.614281	Down	rcu:RCOM_1375760	33	124	2e-26	hypothetical protein
XLOC_017501	3[-]41457926-41477505	Capana03g002019,Capana03g002020,	2.13666	0.891458	1.26112	0.03045	0.996326	Up	vvi:100247074	48	955	0	hypothetical protein LOC100247074		|%IPR001841:Zinc finger, RING-type :%IPR003347:JmjC domain|	|GO:0003677:DNA binding|GO:0005515:protein binding|GO:0008270:zinc ion binding|
XLOC_017525	3[-]45701488-45708150	Capana03g002092,	2.68163	1.16398	1.20405	0.0327	0.996326	Up	rcu:RCOM_1581350	76	2270	0	multidrug resistance-associated protein 1, 3 (mrp1, 3), abc-transoprter, putative (EC:1.3.1.74)		|%IPR001140:ABC transporter, transmembrane domain :%IPR003439:ABC transporter-like|	|GO:0000166:nucleotide binding|GO:0005524:ATP binding|GO:0016887:ATPase activity|GO:0017111:nucleoside-triphosphatase activity|GO:0042626:ATPase activity, coupled to transmembrane movement of substances|	|GO:0016021:integral to membrane|	|GO:0006810:transport|GO:0055085:transmembrane transport|
XLOC_017531	3[-]47983576-47984678	Capana03g002124,	0.484319	2.0085	-2.05209	0.0412	0.996326	Down	vvi:100245797	44	175	5e-42	hypothetical protein LOC100245797
XLOC_017535	3[-]49267534-49275314	Capana03g002143,	2.55801	14.6049	-2.51336	5e-05	0.0875794	Down	pop:POPTR_782053	68	860	0	hypothetical protein		|%IPR000778:Cytochrome b245, heavy chain :%IPR013112:FAD-binding 8|	|GO:0016491:oxidoreductase activity|	|GO:0016020:membrane|	|GO:0055114:oxidation-reduction process|
XLOC_017543	3[-]50010814-50024679	Capana03g002167,Capana03g002168,	5.23905	16.2031	-1.62889	0.00395	0.639234	Down	pop:POPTR_782053	67	655	0	hypothetical protein		|%IPR013112:FAD-binding 8 :%IPR013121:Ferric reductase, NAD binding|	|GO:0016491:oxidoreductase activity|		|GO:0055114:oxidation-reduction process|
XLOC_017558	3[-]53999242-54001043	Capana03g002211,	2.2816	6.29749	-1.46473	0.01605	0.941093	Down	pop:POPTR_761983	39	300	2e-79	hypothetical protein		|%IPR003480:Transferase :%IPR023213:Chloramphenicol acetyltransferase-like domain|	|GO:0016747:transferase activity, transferring acyl groups other than amino-acyl groups|
XLOC_017574	3[-]56162247-56166250	Capana03g002264,	0.31884	1.37571	-2.10927	0.02595	0.996326	Down	pop:POPTR_575832	68	726	0	CYP715A3; cytochrome P450		|%IPR001128:Cytochrome P450 :%IPR002401:Cytochrome P450, E-class, group I|	|GO:0005506:iron ion binding|GO:0009055:electron carrier activity|GO:0016705:oxidoreductase activity, acting on paired donors, with incorporation or reduction of molecular oxygen|GO:0020037:heme binding|		|GO:0055114:oxidation-reduction process|
XLOC_017585	3[-]59711143-59717983	Capana03g002306,	1.22649	0.284755	2.10675	0.0063	0.710588	Up	vvi:100261513	35	568	1e-160	hypothetical protein LOC100261513		|%IPR019448:EEIG1/EHBP1 N-terminal domain :|
XLOC_017605	3[-]66731855-66738374	-	11.6511	27.9722	-1.26353	0.03275	0.996326	Down
XLOC_017606	3[-]66805833-66808652	-	1.17894	8.12325	-2.78456	0.0357	0.996326	Down	vvi:100244555	45	89.7	9e-17	hypothetical protein LOC100244555
XLOC_017612	3[-]70446326-70450107	Capana03g002433,	3.25164	11.4891	-1.82103	0.00275	0.606569	Down	rcu:RCOM_1498360	76	551	1e-155	serine-threonine protein kinase, plant-type, putative (EC:2.7.10.2)		|%IPR000719:Protein kinase domain :%IPR002290:Serine/threonine- / dual specificity protein kinase, catalytic domain|	|GO:0004672:protein kinase activity|GO:0004674:protein serine/threonine kinase activity|GO:0004713:protein tyrosine kinase activity|GO:0005524:ATP binding|GO:0016772:transferase activity, transferring phosphorus-containing groups|		|GO:0006468:protein phosphorylation|
XLOC_017678	3[-]99440870-99444832	Capana03g002679,	7.76758	3.63543	1.09534	0.04135	0.996326	Up	vvi:100267564	71	1469	0	hypothetical protein LOC100267564		|%IPR000719:Protein kinase domain :%IPR001611:Leucine-rich repeat|	|GO:0004672:protein kinase activity|GO:0004674:protein serine/threonine kinase activity|GO:0004713:protein tyrosine kinase activity|GO:0005515:protein binding|GO:0005524:ATP binding|GO:0016772:transferase activity, transferring phosphorus-containing groups|		|GO:0006468:protein phosphorylation|
XLOC_017685	3[-]101016095-101020657	Capana03g002699,	7.39866	2.45781	1.58989	0.004	0.640366	Up	vvi:100266344	70	1483	0	hypothetical protein LOC100266344		|%IPR000719:Protein kinase domain :%IPR001611:Leucine-rich repeat|	|GO:0004672:protein kinase activity|GO:0004674:protein serine/threonine kinase activity|GO:0004713:protein tyrosine kinase activity|GO:0005515:protein binding|GO:0005524:ATP binding|GO:0016772:transferase activity, transferring phosphorus-containing groups|		|GO:0006468:protein phosphorylation|
XLOC_017730	3[-]136303800-136309075	Capana03g002909,	19.0249	8.68315	1.1316	0.02895	0.996326	Up	pop:POPTR_417170	64	724	0	hypothetical protein		|%IPR002885:Pentatricopeptide repeat :|
XLOC_017740	3[-]144404647-144455126	Capana03g002944,Capana03g002945,Capana03g002946,	2.47529	0.821239	1.59172	0.00675	0.739361	Up	vvi:100248703	63	2294	0	similar to PIE1 (PHOTOPERIOD-INDEPENDENT EARLY FLOWERING 1); ATP binding / DNA binding / helicase		|%IPR000330:SNF2-related :%IPR001650:Helicase, C-terminal|	|GO:0003676:nucleic acid binding|GO:0003677:DNA binding|GO:0004386:helicase activity|GO:0005524:ATP binding|
XLOC_017807	3[-]201551316-201569111	Capana03g003272,	23.2041	52.1708	-1.16886	0.0203	0.996326	Down	zma:100277925	48	236	2e-60	hypothetical protein LOC100277925
XLOC_017816	3[-]205562239-205563548	Capana03g003309,	0.554178	2.08521	-1.91177	0.0329	0.996326	Down	pop:POPTR_801467	63	258	9e-67	ERF32; AP2/ERF domain-containing transcription factor		|%IPR001471:AP2/ERF domain :%IPR016177:DNA-binding domain|	|GO:0003677:DNA binding|GO:0003700:sequence-specific DNA binding transcription factor activity|		|GO:0006355:regulation of transcription, DNA-dependent|
XLOC_017824	3[-]209597270-209618381	Capana03g003337,	2.5751	0.779918	1.72323	0.0023	0.555365	Up	rcu:RCOM_0990510	75	5443	0	hypothetical protein		|%IPR000409:BEACH domain :%IPR001680:WD40 repeat|	|GO:0005488:binding|GO:0005515:protein binding|
XLOC_017832	3[-]212508660-212521686	Capana03g003360,Capana03g003361,	5.55038	2.08055	1.41562	0.0151	0.930531	Up	vvi:100247992	68	825	0	hypothetical protein LOC100247992
XLOC_017840	3[-]214122073-214155528	Capana03g003377,	46.1936	98.7896	-1.09667	0.0211	0.996326	Down	vvi:100259592	67	657	0	hypothetical protein LOC100259592		|%IPR001128:Cytochrome P450 :%IPR002401:Cytochrome P450, E-class, group I|	|GO:0005506:iron ion binding|GO:0009055:electron carrier activity|GO:0016705:oxidoreductase activity, acting on paired donors, with incorporation or reduction of molecular oxygen|GO:0020037:heme binding|		|GO:0055114:oxidation-reduction process|
XLOC_017898	3[-]229120875-229121430	Capana03g003566,	2.49766	8.79731	-1.81649	0.01585	0.941093	Down	rcu:RCOM_0555680	77	171	2e-41	glutaredoxin, grx, putative		|%IPR002109:Glutaredoxin :%IPR011905:Glutaredoxin-like, plant II|	|GO:0009055:electron carrier activity|GO:0015035:protein disulfide oxidoreductase activity|		|GO:0045454:cell redox homeostasis|
XLOC_017899	3[-]229221891-229222457	Capana03g003568,	7.68661	26.2999	-1.77464	0.00425	0.652331	Down	rcu:RCOM_0555440	62	142	2e-32	glutaredoxin, grx, putative		|%IPR002109:Glutaredoxin :%IPR011905:Glutaredoxin-like, plant II|	|GO:0009055:electron carrier activity|GO:0015035:protein disulfide oxidoreductase activity|		|GO:0045454:cell redox homeostasis|
XLOC_017906	3[-]230533098-230540035	Capana03g003603,	8.03921	3.42298	1.2318	0.02915	0.996326	Up	vvi:100240760	65	584	1e-165	hypothetical protein LOC100240760		|%IPR003480:Transferase :%IPR023213:Chloramphenicol acetyltransferase-like domain|	|GO:0016747:transferase activity, transferring acyl groups other than amino-acyl groups|
XLOC_017973	3[-]238822526-238827352	Capana03g003827,	6.77072	2.77363	1.28754	0.024	0.996326	Up	vvi:100247664	79	712	0	hypothetical protein LOC100247664; K12119 cryptochrome 2	|Organismal Systems; Environmental Adaptation; Circadian rhythm - plant [PATH:ko04712-Map:ko04712];|	|%IPR002081:Cryptochrome/DNA photolyase, class 1 :%IPR005101:DNA photolyase, FAD-binding/Cryptochrome, C-terminal|	|GO:0003913:DNA photolyase activity|		|GO:0006281:DNA repair|
XLOC_018009	3[-]244858947-244863784	Capana03g004053,	0.831219	2.49933	-1.58824	0.04805	0.996326	Down	ath:AT4G13670	52	390	1e-106	PTAC5; PTAC5 (PLASTID TRANSCRIPTIONALLY ACTIVE5); heat shock protein binding / unfolded protein binding
XLOC_018052	3[-]248787999-248792225	Capana03g004207,	1.50613	0.480354	1.64868	0.0117	0.88802	Up	vvi:100246369	70	1589	0	hypothetical protein LOC100246369		|%IPR000719:Protein kinase domain :%IPR001245:Serine-threonine/tyrosine-protein kinase catalytic domain|	|GO:0004672:protein kinase activity|GO:0004674:protein serine/threonine kinase activity|GO:0004713:protein tyrosine kinase activity|GO:0005515:protein binding|GO:0005524:ATP binding|GO:0016772:transferase activity, transferring phosphorus-containing groups|		|GO:0006468:protein phosphorylation|
XLOC_018107	3[-]253105167-253113333	Capana03g004388,	3.12277	1.37713	1.18116	0.03735	0.996326	Up	rcu:RCOM_1264670	75	1480	0	hypothetical protein		|%IPR002719:Retinoblastoma-associated protein, B-box :%IPR002720:Retinoblastoma-associated protein, A-box|		|GO:0005634:nucleus|	|GO:0051726:regulation of cell cycle|
XLOC_018108	3[-]253122608-253128182	Capana03g004390,	7.15077	3.21194	1.15465	0.0294	0.996326	Up	vvi:100245888	75	1226	0	hypothetical protein LOC100245888		|%IPR000719:Protein kinase domain :%IPR001611:Leucine-rich repeat|	|GO:0004672:protein kinase activity|GO:0004674:protein serine/threonine kinase activity|GO:0004713:protein tyrosine kinase activity|GO:0005515:protein binding|GO:0005524:ATP binding|GO:0016772:transferase activity, transferring phosphorus-containing groups|		|GO:0006468:protein phosphorylation|
XLOC_018113	3[-]253215862-253225359	Capana03g004399,	41.6646	20.489	1.02397	0.03815	0.996326	Up	ath:AT3G23990	88	993	0	HSP60; HSP60 (HEAT SHOCK PROTEIN 60); ATP binding; K04077 chaperonin GroEL	|Genetic Information Processing; Folding, Sorting and Degradation; Chaperones and folding catalysts [BR:ko03110];|Genetic Information Processing; Folding, Sorting and Degradation; RNA degradation [PATH:ko03018-Map:ko03018];|Human Diseases; Infectious Diseases; Tuberculosis [PATH:ko05152-Map:ko05152];|Human Diseases; Metabolic Diseases; Type I diabetes mellitus [PATH:ko04940-Map:ko04940];|	|%IPR001844:Chaperonin Cpn60 :%IPR002423:Chaperonin Cpn60/TCP-1|	|GO:0005524:ATP binding|	|GO:0005737:cytoplasm|	|GO:0006457:protein folding|GO:0042026:protein refolding|GO:0044267:cellular protein metabolic process|
XLOC_018140	3[-]256201054-256202017	Capana03g004524,	6.38487	14.4713	-1.18047	0.04165	0.996326	Down	rcu:RCOM_1007740	55	228	4e-58	Ethylene-responsive transcription factor 1B, putative; K14516 ethylene-responsive transcription factor 1	|Environmental Information Processing; Signal Transduction; Plant hormone signal transduction [PATH:ko04075-Map:ko04075];|Genetic Information Processing; Transcription; Transcription factors [BR:ko03000];|	|%IPR001471:AP2/ERF domain :%IPR016177:DNA-binding domain|	|GO:0003677:DNA binding|GO:0003700:sequence-specific DNA binding transcription factor activity|		|GO:0006355:regulation of transcription, DNA-dependent|
XLOC_018147	3[-]257371190-257376322	Capana03g004551,	29.9995	167.945	-2.48498	5e-05	0.0875794	Down	vvi:100261648	32	60.5	1e-12	hypothetical protein LOC100261648
XLOC_018160	3[-]260000907-260002810	Capana03g004598,	13.594	48.5553	-1.83666	0.0006	0.292889	Down	vvi:100254317	88	53.5	3e-11	hypothetical protein LOC100254317
XLOC_018163	3[-]260345951-260348068	Capana03g004608,	27.4386	12.3207	1.15512	0.0225	0.996326	Up	vvi:100251040	56	395	1e-108	hypothetical protein LOC100251040
XLOC_018174	3[-]261332809-261343131	Capana03g004639,	6.529	3.00345	1.12024	0.0348	0.996326	Up	vvi:100249467	62	1232	0	hypothetical protein LOC100249467		|%IPR000719:Protein kinase domain :%IPR001611:Leucine-rich repeat|	|GO:0004672:protein kinase activity|GO:0004674:protein serine/threonine kinase activity|GO:0004713:protein tyrosine kinase activity|GO:0005515:protein binding|GO:0005524:ATP binding|GO:0016772:transferase activity, transferring phosphorus-containing groups|		|GO:0006468:protein phosphorylation|
XLOC_018189	3[.]1575783-1576588	-	9.88646	21.4911	-1.12021	0.0417	0.996326	Down
XLOC_018289	3[.]17164584-17165389	-	10.4093	25.9351	-1.31703	0.0207	0.996326	Down	pop:POPTR_666406	57	93.2	2e-17	hypothetical protein
XLOC_018298	3[.]18554453-18557906	-	112.975	270.752	-1.26096	0.00635	0.710842	Down
XLOC_018325	3[.]22554798-22556220	-	2.35353	9.10152	-1.95128	0.00175	0.466075	Down	rcu:RCOM_1507870	54	380	1e-103	F-box and wd40 domain protein, putative		|%IPR001680:WD40 repeat :%IPR015943:WD40/YVTN repeat-like-containing domain|	|GO:0005515:protein binding|
XLOC_018331	3[.]25041395-25041977	-	8.90915	25.076	-1.49295	0.0116	0.88802	Down	vvi:100246199	61	78.2	3e-13	hypothetical protein LOC100246199
XLOC_018430	3[.]61845660-61846204	-	0	1.12053	-inf	0.0011	0.36803	Down
XLOC_018582	3[.]223745449-223746253	-	2.47555	6.71074	-1.43872	0.0332	0.996326	Down
XLOC_018590	3[.]228368235-228369160	-	3.63245	10.7269	-1.56222	0.0122	0.891872	Down
XLOC_018610	3[.]236027524-236028275	-	14.9223	32.7928	-1.13591	0.0397	0.996326	Down
XLOC_018620	3[.]240378924-240379523	-	0	0.890559	-inf	0.00155	0.461544	Down
XLOC_018645	3[.]245207916-245209329	-	14.7443	51.2844	-1.79836	0.0008	0.340309	Down	pop:POPTR_550715	40	201	1e-49	hypothetical protein		|%IPR000719:Protein kinase domain :%IPR001245:Serine-threonine/tyrosine-protein kinase catalytic domain|	|GO:0004672:protein kinase activity|GO:0004713:protein tyrosine kinase activity|GO:0005524:ATP binding|GO:0016772:transferase activity, transferring phosphorus-containing groups|		|GO:0006468:protein phosphorylation|
XLOC_018765	4[+]833712-839188	Capana04g000076,	39.4969	91.4386	-1.21106	0.01295	0.892621	Down	vvi:100254778	64	532	1e-149	hypothetical protein LOC100254778		|%IPR000719:Protein kinase domain :%IPR001245:Serine-threonine/tyrosine-protein kinase catalytic domain|	|GO:0004672:protein kinase activity|GO:0004674:protein serine/threonine kinase activity|GO:0004713:protein tyrosine kinase activity|GO:0005524:ATP binding|GO:0016772:transferase activity, transferring phosphorus-containing groups|		|GO:0006468:protein phosphorylation|
XLOC_018775	4[+]1047096-1053352	Capana04g000096,	80.1121	171.072	-1.09451	0.02045	0.996326	Down	vvi:100252277	76	721	0	hypothetical protein LOC100252277
XLOC_018798	4[+]1944923-1949095	Capana04g000159,	41.5514	18.2367	1.18805	0.0175	0.975838	Up	vvi:100257482	66	1002	0	hypothetical protein LOC100257482		|%IPR000209:Peptidase S8/S53 domain :%IPR003137:Protease-associated domain, PA|	|GO:0004252:serine-type endopeptidase activity|GO:0042802:identical protein binding|		|GO:0006508:proteolysis|GO:0043086:negative regulation of catalytic activity|
XLOC_018802	4[+]2170956-2174028	-	32.8033	84.6221	-1.36719	0.0141	0.91398	Down
XLOC_018823	4[+]3718946-3736441	Capana04g000236,	2.11038	0.833545	1.34017	0.01825	0.990762	Up	vvi:100255769	54	1920	0	hypothetical protein LOC100255769		|%IPR002937:Amine oxidase :%IPR007526:SWIRM domain|	|GO:0003677:DNA binding|GO:0005515:protein binding|GO:0016491:oxidoreductase activity|		|GO:0055114:oxidation-reduction process|
XLOC_018839	4[+]4409341-4412773	Capana04g000279,	1.57989	4.01609	-1.34597	0.0292	0.996326	Down	pop:POPTR_818768	79	790	0	hypothetical protein		|%IPR004843:Phosphoesterase domain :%IPR008963:Purple acid phosphatase-like, N-terminal|	|GO:0003993:acid phosphatase activity|GO:0016787:hydrolase activity|GO:0046872:metal ion binding|
XLOC_018893	4[+]6922304-6924420	Capana04g000442,	0.99415	4.04559	-2.02482	0.0143	0.915723	Down	vvi:100245440	49	229	2e-58	hypothetical protein LOC100245440
XLOC_018896	4[+]7118247-7120174	Capana04g000454,	82.3812	197.93	-1.26461	0.00845	0.776592	Down	pop:POPTR_644172	73	785	0	CYP74A1; cytochrome P450 allene oxide synthase (EC:4.2.1.92); K01723 hydroperoxide dehydratase [EC:4.2.1.92]	|Metabolism; Enzyme Families; Cytochrome P450 [BR:ko00199];|Metabolism; Lipid Metabolism; alpha-Linolenic acid metabolism [PATH:ko00592-Map:ko00592];|	|%IPR001128:Cytochrome P450 :%IPR002403:Cytochrome P450, E-class, group IV|	|GO:0004497:monooxygenase activity|GO:0005506:iron ion binding|GO:0009055:electron carrier activity|GO:0016705:oxidoreductase activity, acting on paired donors, with incorporation or reduction of molecular oxygen|GO:0020037:heme binding|		|GO:0055114:oxidation-reduction process|
XLOC_018913	4[+]8356535-8359035	Capana04g000520,	0	0.737297	-inf	5e-05	0.0875794	Down	vvi:100252227	69	367	1e-99	hypothetical protein LOC100252227		|%IPR016035:Acyl transferase/acyl hydrolase/lysophospholipase :|			|GO:0008152:metabolic process|
XLOC_018922	4[+]8481387-8482859	Capana04g000534,	4.52321	1.64784	1.45677	0.02515	0.996326	Up	vvi:100243702	50	266	4e-69	hypothetical protein LOC100243702; K14499 BRI1 kinase inhibitor 1	|Environmental Information Processing; Signal Transduction; Plant hormone signal transduction [PATH:ko04075-Map:ko04075];|
XLOC_019016	4[+]16055301-16057149	Capana04g000823,	0	0.554307	-inf	0.0051	0.671798	Down	vvi:100243675	66	362	1e-98	hypothetical protein LOC100243675		|%IPR002213:UDP-glucuronosyl/UDP-glucosyltransferase :|	|GO:0016758:transferase activity, transferring hexosyl groups|		|GO:0008152:metabolic process|
XLOC_019040	4[+]18462395-18463387	Capana04g000892,	114.451	242.908	-1.08567	0.0246	0.996326	Down	pop:POPTR_559028	50	176	1e-42	hypothetical protein
XLOC_019053	4[+]21596998-21598286	Capana04g000922,	15.4605	32.6026	-1.0764	0.0373	0.996326	Down	rcu:RCOM_1464250	38	164	1e-38	ATP binding protein, putative (EC:2.7.11.30)
XLOC_019058	4[+]22077165-22081166	Capana04g000937,	74.0071	152.939	-1.04722	0.03185	0.996326	Down	vvi:100254028	35	95.1	6e-18	hypothetical protein LOC100254028
XLOC_019064	4[+]22635560-22637526	Capana04g000956,	15.4132	6.79953	1.18066	0.0264	0.996326	Up	vvi:100267583	51	504	1e-141	hypothetical protein LOC100267583		|%IPR001128:Cytochrome P450 :%IPR002401:Cytochrome P450, E-class, group I|	|GO:0005506:iron ion binding|GO:0009055:electron carrier activity|GO:0016705:oxidoreductase activity, acting on paired donors, with incorporation or reduction of molecular oxygen|GO:0020037:heme binding|		|GO:0055114:oxidation-reduction process|
XLOC_019069	4[+]23369808-23371908	Capana04g000966,	8.99324	23.8318	-1.40598	0.0098	0.830401	Down	vvi:100255823	47	238	8e-61	hypothetical protein LOC100255823		|%IPR000047:Helix-turn-helix motif :%IPR001356:Homeobox domain|	|GO:0000976:transcription regulatory region sequence-specific DNA binding|GO:0003677:DNA binding|GO:0003700:sequence-specific DNA binding transcription factor activity|GO:0043565:sequence-specific DNA binding|	|GO:0005634:nucleus|	|GO:0006355:regulation of transcription, DNA-dependent|
XLOC_019131	4[+]36472152-36472733	Capana04g001183,	20.0304	50.983	-1.34782	0.01665	0.952636	Down	rcu:RCOM_0682030	38	73.2	9e-12	ring finger protein, putative
XLOC_019149	4[+]42118708-42131153	Capana04g001269,	2.42284	0.684057	1.82451	0.001	0.36803	Up	sha:SH0326	23	169	3e-39	hypothetical protein
XLOC_019156	4[+]43119636-43121049	Capana04g001289,	54.0973	119.81	-1.14712	0.0201	0.996326	Down	sbi:SORBI_06g016540	40	179	2e-43	hypothetical protein		|%IPR003496:ABA/WDS induced protein :|			|GO:0006950:response to stress|
XLOC_019180	4[+]51186886-51193077	-	5.34923	12.7099	-1.24855	0.0345	0.996326	Down
XLOC_019212	4[+]61936101-61954175	Capana04g001513,	4.21225	15.8908	-1.91553	0.0153	0.931673	Down	zma:100191513	71	605	1e-171	pco079304; LOC100191513; K00166 2-oxoisovalerate dehydrogenase E1 component, alpha subunit [EC:1.2.4.4]	|Metabolism; Amino Acid Metabolism; Valine, leucine and isoleucine degradation [PATH:ko00280-Map:ko00280];|	|%IPR001017:Dehydrogenase, E1 component :|	|GO:0016624:oxidoreductase activity, acting on the aldehyde or oxo group of donors, disulfide as acceptor|		|GO:0008152:metabolic process|
XLOC_019215	4[+]64613297-64625399	Capana04g001536,	2.21449	0.820235	1.43286	0.012	0.891836	Up	vvi:100260874	79	3288	0	hypothetical protein LOC100260874		|%IPR000008:C2 calcium-dependent membrane targeting :%IPR000225:Armadillo|	|GO:0005488:binding|GO:0005515:protein binding|
XLOC_019216	4[+]64888276-64929944	Capana04g001540,	1.01155	0.332186	1.6065	0.0383	0.996326	Up	vvi:100262510	65	1109	0	hypothetical protein LOC100262510		|%IPR000922:D-galactoside/L-rhamnose binding SUEL lectin domain :%IPR001944:Glycoside hydrolase, family 35|	|GO:0003824:catalytic activity|GO:0004553:hydrolase activity, hydrolyzing O-glycosyl compounds|GO:0030246:carbohydrate binding|		|GO:0005975:carbohydrate metabolic process|
XLOC_019282	4[+]109975839-109976696	Capana04g001803,	12.9512	41.3224	-1.67384	0.00295	0.614281	Down	pop:POPTR_592351	59	192	2e-47	DREB49; AP2/ERF domain-containing transcription factor		|%IPR001471:AP2/ERF domain :%IPR016177:DNA-binding domain|	|GO:0003677:DNA binding|GO:0003700:sequence-specific DNA binding transcription factor activity|		|GO:0006355:regulation of transcription, DNA-dependent|
XLOC_019308	4[+]138475098-138503574	-	1.82279	5.60039	-1.61938	0.04565	0.996326	Down	ath:AT1G04190	70	79	2e-13	tetratricopeptide repeat (TPR)-containing protein
XLOC_019376	4[+]184955185-184956180	Capana04g002208,	45.5591	114.984	-1.33563	0.0077	0.754156	Down	rcu:RCOM_0190360	61	297	7e-79	tonoplast intrinsic protein, putative		|%IPR000425:Major intrinsic protein :%IPR022357:Major intrinsic protein, conserved site|	|GO:0005215:transporter activity|	|GO:0016020:membrane|	|GO:0006810:transport|
XLOC_019399	4[+]191780216-191786441	Capana04g002283,	3.86401	1.75357	1.1398	0.03475	0.996326	Up	pop:POPTR_558853	44	1087	0	hypothetical protein		|%IPR022113:Protein of unknown function DUF3651, TMEM131 :|
XLOC_019439	4[+]202095225-202103336	Capana04g002423,	22.4052	11.0403	1.02105	0.03985	0.996326	Up	vvi:100243856	74	1060	0	TMT3; putative tonoplastic monosaccharide transporter		|%IPR003663:Sugar/inositol transporter :%IPR005828:General substrate transporter|	|GO:0005215:transporter activity|GO:0022857:transmembrane transporter activity|GO:0022891:substrate-specific transmembrane transporter activity|	|GO:0016020:membrane|GO:0016021:integral to membrane|	|GO:0006810:transport|GO:0055085:transmembrane transport|
XLOC_019447	4[+]204796201-204804245	Capana04g002494,Capana04g002495,	20.4515	44.3891	-1.118	0.02235	0.996326	Down	pop:POPTR_890068	61	802	0	hypothetical protein		|%IPR000719:Protein kinase domain :%IPR001220:Legume lectin domain|	|GO:0004672:protein kinase activity|GO:0004674:protein serine/threonine kinase activity|GO:0004713:protein tyrosine kinase activity|GO:0005524:ATP binding|GO:0016772:transferase activity, transferring phosphorus-containing groups|GO:0030246:carbohydrate binding|		|GO:0006468:protein phosphorylation|
XLOC_019467	4[+]206738801-206740537	Capana04g002565,	14.0932	33.5852	-1.25282	0.01415	0.91398	Down	vvi:100247985	52	218	2e-54	hypothetical protein LOC100247985		|%IPR027949:Petal formation-expressed :|
XLOC_019469	4[+]207348476-207349140	-	17.7227	46.5271	-1.39247	0.0137	0.904534	Down
XLOC_019477	4[+]207866205-207871523	Capana04g002605,Capana04g002606,	2.3658	0.964827	1.29399	0.03675	0.996326	Up	pop:POPTR_771134	48	469	1e-130	hypothetical protein
XLOC_019505	4[+]213349081-213354821	Capana04g002762,	5.79074	14.9307	-1.36646	0.0138	0.907114	Down	vvi:100262819	42	76.6	4e-12	hypothetical protein LOC100262819		|%IPR000916:Bet v I domain :%IPR023393:START-like domain|			|GO:0006952:defense response|GO:0009607:response to biotic stimulus|
XLOC_019559	4[-]583044-583801	Capana04g000053,	133.995	309.783	-1.20908	0.0126	0.892621	Down	vvi:100266753	66	229	2e-58	hypothetical protein LOC100266753		|%IPR001841:Zinc finger, RING-type :%IPR013083:Zinc finger, RING/FYVE/PHD-type|	|GO:0005515:protein binding|GO:0008270:zinc ion binding|
XLOC_019577	4[-]1228352-1229604	Capana04g000109,	0.250085	1.75734	-2.8129	0.0467	0.996326	Down	rcu:RCOM_1410570	47	254	7e-66	hypothetical protein
XLOC_019589	4[-]1695672-1696422	Capana04g000139,	46.047	115.447	-1.32605	0.0106	0.850771	Down	rcu:RCOM_2072230	58	152	2e-35	metal ion binding protein, putative
XLOC_019602	4[-]2155712-2159096	Capana04g000174,	16.4455	50.3481	-1.61424	0.0045	0.671798	Down
XLOC_019603	4[-]2201895-2209351	Capana04g000178,	6.19198	2.70642	1.19401	0.0351	0.996326	Up	pop:POPTR_761509	77	1107	0	hypothetical protein; K13181 ATP-dependent RNA helicase DDX27 [EC:3.6.4.13]	|Genetic Information Processing; Transcription; Spliceosome [BR:ko03041];|Genetic Information Processing; Translation; Ribosome Biogenesis [BR:ko03009];|	|%IPR000629:RNA helicase, ATP-dependent, DEAD-box, conserved site :%IPR001650:Helicase, C-terminal|	|GO:0003676:nucleic acid binding|GO:0004386:helicase activity|GO:0005524:ATP binding|GO:0008026:ATP-dependent helicase activity|
XLOC_019610	4[-]2400937-2414708	Capana04g000189,Capana04g000190,	17.4056	8.31057	1.06653	0.0464	0.996326	Up	vvi:100256322	65	427	1e-117	hypothetical protein LOC100256322		|%IPR006806:ETC complex I subunit :|	|GO:0016651:oxidoreductase activity, acting on NAD(P)H|	|GO:0005743:mitochondrial inner membrane|	|GO:0022904:respiratory electron transport chain|
XLOC_019651	4[-]5216210-5223802	Capana04g000328,	5.14874	2.1598	1.25332	0.01985	0.996326	Up	rcu:RCOM_0535530	29	493	1e-137	auxilin, putative		|%IPR001623:DnaJ domain :|
XLOC_019671	4[-]5809182-5813433	Capana04g000378,	19.6596	45.8875	-1.22286	0.02085	0.996326	Down	rcu:RCOM_0536300	54	186	2e-45	sugar transporter, putative (EC:1.3.1.74)
XLOC_019696	4[-]7136771-7137440	Capana04g000457,	12.3428	28.3393	-1.19914	0.03545	0.996326	Down
XLOC_019709	4[-]7802422-7804717	Capana04g000483,	1.98627	0.47622	2.06036	0.01995	0.996326	Up	rcu:RCOM_1592100	72	679	0	nitrate transporter, putative		|%IPR000109:Proton-dependent oligopeptide transporter family :%IPR016196:Major facilitator superfamily domain, general substrate transporter|	|GO:0005215:transporter activity|	|GO:0016020:membrane|	|GO:0006810:transport|
XLOC_019715	4[-]8150235-8151649	Capana04g000510,	15.2395	35.1152	-1.20428	0.01875	0.996326	Down	vvi:100243808	43	248	8e-64	hypothetical protein LOC100243808
XLOC_019724	4[-]8547065-8547448	Capana04g000537,	30.3717	66.6842	-1.13462	0.0445	0.996326	Down	vvi:100260805	59	117	2e-25	hypothetical protein LOC100260805
XLOC_019733	4[-]9127225-9138573	Capana04g000573,	5.77619	2.61614	1.14268	0.03755	0.996326	Up	vvi:100255840	83	1707	0	hypothetical protein LOC100255840; K10395 kinesin family member 4/7/21/27	|Cellular Processes; Cell Motility; Cytoskeleton proteins [BR:ko04812];|	|%IPR001752:Kinesin, motor domain :%IPR019821:Kinesin, motor region, conserved site|	|GO:0003777:microtubule motor activity|GO:0005524:ATP binding|GO:0008017:microtubule binding|	|GO:0005871:kinesin complex|	|GO:0007018:microtubule-based movement|
XLOC_019735	4[-]9292830-9295224	Capana04g000583,	11.0698	5.03268	1.13723	0.04995	0.996326	Up	pop:POPTR_836454	71	319	2e-85	hypothetical protein		|%IPR001356:Homeobox domain :%IPR009057:Homeodomain-like|	|GO:0003677:DNA binding|GO:0003700:sequence-specific DNA binding transcription factor activity|GO:0043565:sequence-specific DNA binding|		|GO:0006355:regulation of transcription, DNA-dependent|
XLOC_019746	4[-]9929847-9932954	Capana04g000622,	13.4529	30.4238	-1.17728	0.02135	0.996326	Down	rcu:RCOM_1588520	52	527	1e-147	cytochrome P450, putative (EC:1.14.13.89)		|%IPR001128:Cytochrome P450 :%IPR002401:Cytochrome P450, E-class, group I|	|GO:0005506:iron ion binding|GO:0009055:electron carrier activity|GO:0016705:oxidoreductase activity, acting on paired donors, with incorporation or reduction of molecular oxygen|GO:0020037:heme binding|		|GO:0055114:oxidation-reduction process|
XLOC_019768	4[-]11675206-11683537	Capana04g000693,	9.50313	4.5841	1.05176	0.04415	0.996326	Up	vvi:100243694	67	800	0	hypothetical protein LOC100243694; K14548 U3 small nucleolar RNA-associated protein 4	|Genetic Information Processing; Translation; Ribosome Biogenesis [BR:ko03009];|Genetic Information Processing; Translation; Ribosome biogenesis in eukaryotes [PATH:ko03008-Map:ko03008];|	|%IPR001680:WD40 repeat :%IPR015943:WD40/YVTN repeat-like-containing domain|	|GO:0005515:protein binding|
XLOC_019785	4[-]13828228-13839020	Capana04g000756,	27.5452	13.6781	1.00993	0.0412	0.996326	Up	pop:POPTR_411700	74	1415	0	hypothetical protein		|%IPR001000:Glycoside hydrolase, family 10 :%IPR003305:Carbohydrate-binding, CenC-like|	|GO:0003824:catalytic activity|GO:0004553:hydrolase activity, hydrolyzing O-glycosyl compounds|GO:0016798:hydrolase activity, acting on glycosyl bonds|		|GO:0005975:carbohydrate metabolic process|
XLOC_019808	4[-]16085492-16090764	Capana04g000824,	8.1228	3.58497	1.18002	0.0337	0.996326	Up	vvi:100262460	55	504	1e-141	hypothetical protein LOC100262460; K13495 cis-zeatin O-glucosyltransferase [EC:2.4.1.215]	|Metabolism; Metabolism of Terpenoids and Polyketides; Zeatin biosynthesis [PATH:ko00908-Map:ko00908];|	|%IPR002213:UDP-glucuronosyl/UDP-glucosyltransferase :|	|GO:0016758:transferase activity, transferring hexosyl groups|		|GO:0008152:metabolic process|
XLOC_019809	4[-]16113072-16142778	Capana04g000828,	4.83482	2.14514	1.17239	0.0264	0.996326	Up	vvi:100254031	71	3152	0	similar to SAB		|%IPR019441:FMP27, GFWDK domain :%IPR019443:FMP27, C-terminal|
XLOC_019886	4[-]29584885-29587354	Capana04g001088,	38.6113	16.1156	1.26057	0.01305	0.896005	Up	pop:POPTR_780575	50	375	1e-102	hypothetical protein		|%IPR009091:Regulator of chromosome condensation 1/beta-lactamase-inhibitor protein II :|
XLOC_019902	4[-]32911611-32924488	Capana04g001142,	2.58503	0.841824	1.61859	0.0051	0.671798	Up	rcu:RCOM_1033380	39	1152	0	ATP binding protein, putative		|%IPR019448:EEIG1/EHBP1 N-terminal domain :|
XLOC_019906	4[-]34496916-34497480	Capana04g001159,	5.16186	18.3967	-1.83349	0.0059	0.686718	Down	pop:POPTR_562655	32	82.4	2e-14	hypothetical protein		|%IPR001841:Zinc finger, RING-type :%IPR013083:Zinc finger, RING/FYVE/PHD-type|	|GO:0005515:protein binding|GO:0008270:zinc ion binding|
XLOC_019927	4[-]37885541-37887662	Capana04g001225,	1.14399	0.334916	1.7722	0.0404	0.996326	Up	pop:POPTR_761111	64	728	0	hypothetical protein		|%IPR002885:Pentatricopeptide repeat :|
XLOC_019944	4[-]43931358-43932830	Capana04g001309,	1.77673	4.6714	-1.39463	0.03405	0.996326	Down	pop:POPTR_754451	40	175	7e-42	hypothetical protein
XLOC_019963	4[-]51696885-51706033	Capana04g001409,	0.937986	3.07118	-1.71115	0.0384	0.996326	Down	pop:POPTR_1078656	44	174	1e-41	hypothetical protein		|%IPR004316:SWEET sugar transporter :|		|GO:0016021:integral to membrane|
XLOC_020002	4[-]65000616-65005465	-	3.3199	13.9677	-2.07288	0.01335	0.897343	Down
XLOC_020027	4[-]73175572-73178137	-	0.778215	2.50009	-1.68374	0.0327	0.996326	Down	vvi:100249570	46	84	3e-14	hypothetical protein LOC100249570
XLOC_020140	4[-]164183752-164188566	-	1.8803	4.65126	-1.30666	0.0317	0.996326	Down	vvi:100241961	87	149	5e-92	hypothetical protein LOC100241961; K13412 calcium-dependent protein kinase [EC:2.7.11.1]	|Human Diseases; Infectious Diseases; Toxoplasmosis [PATH:ko05145-Map:ko05145];|Metabolism; Enzyme Families; Protein kinases [BR:ko01001];|Organismal Systems; Environmental Adaptation; Plant-pathogen interaction [PATH:ko04626-Map:ko04626];|	|%IPR000719:Protein kinase domain :%IPR002048:EF-hand domain|	|GO:0004672:protein kinase activity|GO:0005509:calcium ion binding|GO:0005524:ATP binding|GO:0016772:transferase activity, transferring phosphorus-containing groups|		|GO:0006468:protein phosphorylation|
XLOC_020226	4[-]201838507-201841021	Capana04g002414,	43.2816	21.192	1.03023	0.03485	0.996326	Up	rcu:RCOM_0874930	75	640	0	amino acid transporter, putative; K14209 solute carrier family 36 (proton-coupled amino acid transporter), member 1	|Organismal Systems; Digestive System; Protein digestion and absorption [PATH:ko04974-Map:ko04974];|	|%IPR013057:Amino acid transporter, transmembrane :|
XLOC_020227	4[-]202067420-202078690	Capana04g002422,	1.66947	0.481229	1.7946	0.0039	0.639234	Up	vvi:100248664	45	1731	0	hypothetical protein LOC100248664
XLOC_020234	4[-]205282264-205283677	-	41.2687	86.9545	-1.07521	0.0451	0.996326	Down							|%IPR003465:Proteinase inhibitor I20, Pin2 :|	|GO:0004867:serine-type endopeptidase inhibitor activity|
XLOC_020241	4[-]206468751-206469385	Capana04g002548,	2.87202	12.5396	-2.12636	0.0037	0.639234	Down	pop:POPTR_555330	35	73.9	7e-12	hypothetical protein
XLOC_020249	4[-]206742649-206750253	Capana04g002566,	50.2623	107.052	-1.09077	0.0214	0.996326	Down	rcu:RCOM_0903800	78	234	4e-73	peroxisomal membrane protein 2, pxmp2, putative		|%IPR007248:Mpv17/PMP22 :|		|GO:0016021:integral to membrane|
XLOC_020256	4[-]207666971-207677690	Capana04g002593,	20.718	8.17963	1.34078	0.01485	0.930531	Up	pop:POPTR_833993	49	151	8e-35	hypothetical protein
XLOC_020262	4[-]207938747-207943279	Capana04g002612,	112.677	303.084	-1.42753	0.0032	0.639234	Down	vvi:100261977	67	356	1e-96	hypothetical protein LOC100261977		|%IPR024286:Domain of unknown function DUF3700 :|
XLOC_020264	4[-]210289692-210294766	Capana04g002644,	17.2234	52.9647	-1.62066	0.0038	0.639234	Down	rcu:RCOM_1673900	62	147	9e-34	Auxin-repressed 12.5 kDa protein, putative		|%IPR008406:Dormancyauxin associated :|
XLOC_020317	4[-]215579375-215581232	Capana04g002885,	3.8714	1.41778	1.44923	0.0248	0.996326	Up	vvi:100266316	74	674	0	hypothetical protein LOC100266316		|%IPR002168:Lipase, GDXG, active site :%IPR013094:Alpha/beta hydrolase fold-3|	|GO:0016787:hydrolase activity|		|GO:0008152:metabolic process|
XLOC_020331	4[.]1708042-1709327	-	15.691	47.8502	-1.60859	0.00275	0.606569	Down	rcu:RCOM_1599530	44	194	2e-47	hypothetical protein
XLOC_020332	4[.]2060308-2061115	-	0.710707	2.80059	-1.97841	0.04865	0.996326	Down
XLOC_020338	4[.]2534545-2535090	-	3.85951	10.7651	-1.47987	0.0317	0.996326	Down
XLOC_020377	4[.]9744818-9745437	-	2.42937	8.88078	-1.8701	0.0118	0.889541	Down
XLOC_020380	4[.]9825753-9826357	-	7.05451	19.7582	-1.48583	0.0165	0.95033	Down
XLOC_020382	4[.]9848491-9849515	-	39.8762	80.5906	-1.01508	0.0421	0.996326	Down
XLOC_020523	4[.]71576724-71579861	-	1.75054	3.96499	-1.17952	0.04	0.996326	Down
XLOC_020526	4[.]74900433-74901002	-	4.03135	10.9116	-1.43653	0.0343	0.996326	Down	rcu:RCOM_1590730	48	84	5e-15	hypothetical protein
XLOC_020527	4[.]74922049-74922666	-	1.83029	5.50833	-1.58954	0.0466	0.996326	Down	rcu:RCOM_1590730	45	81.6	3e-14	hypothetical protein
XLOC_020528	4[.]74928117-74928736	-	1.43376	4.92912	-1.78152	0.04065	0.996326	Down	rcu:RCOM_1590730	47	84.7	3e-15	hypothetical protein
XLOC_020529	4[.]74946574-74947081	-	1.9864	8.12067	-2.03144	0.02	0.996326	Down	rcu:RCOM_1590730	44	75.5	1e-12	hypothetical protein
XLOC_020534	4[.]85835685-85836290	-	0	0.798018	-inf	0.00345	0.639234	Down
XLOC_020536	4[.]86066574-86068441	-	2.82755	11.2742	-1.9954	0.00455	0.671798	Down
XLOC_020626	4[.]204000127-204001092	-	1.59153	5.88252	-1.88602	0.0088	0.795842	Down	vvi:100254091	43	217	9e-55	hypothetical protein LOC100254091		|%IPR001611:Leucine-rich repeat :%IPR003591:Leucine-rich repeat, typical subtype|	|GO:0005515:protein binding|
XLOC_020627	4[.]204263277-204264074	-	4.23661	1.47794	1.51932	0.04715	0.996326	Up
XLOC_020645	4[.]212240890-212242202	-	0.000555902	1.50787	-11.4054	0.0117	0.88802	Down
XLOC_020664	4[.]213808801-213809389	-	0.725577	0	inf	0.00555	0.671798	Up	pop:POPTR_772054	48	184	2e-45	hypothetical protein		|%IPR013210:Leucine-rich repeat-containing N-terminal, type 2 :%IPR025875:Leucine rich repeat 4|
XLOC_020773	5[+]8097854-8098477	Capana05g000370,	9.96496	33.2853	-1.73995	0.00605	0.690233	Down
XLOC_020789	5[+]9460844-9467030	Capana05g000414,	10.1945	4.9478	1.04294	0.03805	0.996326	Up	vvi:100255210	91	2260	0	hypothetical protein LOC100255210; K12830 splicing factor 3B subunit 3	|Genetic Information Processing; Transcription; Spliceosome [BR:ko03041];|Genetic Information Processing; Transcription; Spliceosome [PATH:ko03040-Map:ko03040];|	|%IPR004871:Cleavage/polyadenylation specificity factor, A subunit, C-terminal :%IPR015943:WD40/YVTN repeat-like-containing domain|	|GO:0003676:nucleic acid binding|GO:0005515:protein binding|	|GO:0005634:nucleus|
XLOC_020799	5[+]10342126-10344164	Capana05g000457,	9.21107	3.73842	1.30094	0.0252	0.996326	Up	vvi:100253505	61	350	2e-94	hypothetical protein LOC100253505		|%IPR000719:Protein kinase domain :%IPR002290:Serine/threonine- / dual specificity protein kinase, catalytic domain|	|GO:0004672:protein kinase activity|GO:0004674:protein serine/threonine kinase activity|GO:0004713:protein tyrosine kinase activity|GO:0005524:ATP binding|GO:0016772:transferase activity, transferring phosphorus-containing groups|		|GO:0006468:protein phosphorylation|
XLOC_020818	5[+]14986003-14987404	Capana05g000551,	1.61091	5.39659	-1.74417	0.0068	0.739361	Down	ath:AT5G08430	40	72.8	6e-11	SWIB complex BAF60b domain-containing protein / plus-3 domain-containing protein / GYF domain-containing protein
XLOC_020858	5[+]25850580-25865869	Capana05g000711,	7.70164	3.84691	1.00146	0.04655	0.996326	Up	vvi:100260241	59	765	0	hypothetical protein LOC100260241		|%IPR002048:EF-hand domain :%IPR011992:EF-hand domain pair|	|GO:0005509:calcium ion binding|		|GO:0006915:apoptotic process|
XLOC_020880	5[+]31386524-31388642	Capana05g000798,	32.333	15.3775	1.07219	0.03225	0.996326	Up	vvi:100253268	69	790	0	hypothetical protein LOC100253268; K14494 DELLA protein	|Environmental Information Processing; Signal Transduction; Plant hormone signal transduction [PATH:ko04075-Map:ko04075];|	|%IPR005202:Transcription factor GRAS :%IPR021914:Transcriptional factor DELLA, N-terminal|
XLOC_020906	5[+]34598262-34599906	Capana05g000896,	104.268	209.457	-1.00636	0.0308	0.996326	Down	vvi:100249092	60	517	1e-145	hypothetical protein LOC100249092		|%IPR003613:U box domain :%IPR011989:Armadillo-like helical|	|GO:0004842:ubiquitin-protein ligase activity|GO:0005488:binding|	|GO:0000151:ubiquitin ligase complex|	|GO:0016567:protein ubiquitination|
XLOC_020919	5[+]37155058-37159582	Capana05g000937,	21.3116	52.3122	-1.29551	0.02055	0.996326	Down	pop:POPTR_658735	64	271	7e-71	hypothetical protein		|%IPR006461:Uncharacterised protein family Cys-rich :|
XLOC_020922	5[+]39586587-39596844	Capana05g000955,	0	0.805112	-inf	0.0005	0.275713	Down	ath:AT2G03590	77	282	2e-74	ATUPS1; ATUPS1 (ARABIDOPSIS THALIANA UREIDE PERMEASE 1); allantoin uptake transmembrane transporter		|%IPR009834:Ureide permease :|
XLOC_020950	5[+]59191049-59192044	Capana05g001071,	30.4737	10.4826	1.53957	0.00685	0.739361	Up	vvi:100258132	56	216	1e-54	hypothetical protein LOC100258132
XLOC_020965	5[+]69434728-69443477	Capana05g001133,	3.60889	10.384	-1.52474	0.02275	0.996326	Down	rcu:RCOM_0275580	58	380	1e-124	TRANSPARENT TESTA 12 protein, putative		|%IPR002528:Multi antimicrobial extrusion protein :|	|GO:0015238:drug transmembrane transporter activity|GO:0015297:antiporter activity|	|GO:0016020:membrane|	|GO:0006855:drug transmembrane transport|GO:0055085:transmembrane transport|
XLOC_021037	5[+]134924744-134926219	-	7.45635	18.3926	-1.30258	0.03395	0.996326	Down
XLOC_021049	5[+]146333561-146359271	Capana05g001530,Capana05g001532,Capana05g001533,	3.06024	1.42861	1.09903	0.04535	0.996326	Up	ath:AT5G04240	51	840	0	ELF6; ELF6 (EARLY FLOWERING 6); transcription factor		|%IPR003347:JmjC domain :%IPR003349:Transcription factor jumonji, JmjN|	|GO:0003676:nucleic acid binding|GO:0005515:protein binding|GO:0046872:metal ion binding|
XLOC_021100	5[+]173491411-173494057	Capana05g001761,	3.30533	1.2781	1.37079	0.0385	0.996326	Up	rcu:RCOM_0038230	57	112	5e-23	hypothetical protein
XLOC_021124	5[+]178412737-178413722	Capana05g001864,	41.1839	96.3652	-1.22643	0.0141	0.91398	Down	pop:POPTR_572022	45	112	3e-23	hypothetical protein
XLOC_021135	5[+]183651574-183658077	Capana05g001926,	4.89618	1.9782	1.30746	0.02215	0.996326	Up	vvi:100266344	70	1420	0	hypothetical protein LOC100266344		|%IPR000719:Protein kinase domain :%IPR001611:Leucine-rich repeat|	|GO:0004672:protein kinase activity|GO:0004674:protein serine/threonine kinase activity|GO:0004713:protein tyrosine kinase activity|GO:0005515:protein binding|GO:0005524:ATP binding|GO:0016772:transferase activity, transferring phosphorus-containing groups|		|GO:0006468:protein phosphorylation|
XLOC_021142	5[+]187945621-187946654	Capana05g001951,	82.8149	36.0385	1.20035	0.0164	0.948238	Up	pop:POPTR_751093	39	161	8e-38	ERF1; AP2/ERF domain-containing transcription factor		|%IPR001471:AP2/ERF domain :%IPR016177:DNA-binding domain|	|GO:0003677:DNA binding|GO:0003700:sequence-specific DNA binding transcription factor activity|		|GO:0006355:regulation of transcription, DNA-dependent|
XLOC_021200	5[+]201350002-201351499	Capana05g002178,	56.8942	22.3954	1.34508	0.00835	0.774573	Up	vvi:100245996	69	480	1e-133	hypothetical protein LOC100245996		|%IPR000823:Plant peroxidase :%IPR002016:Haem peroxidase, plant/fungal/bacterial|	|GO:0004601:peroxidase activity|GO:0020037:heme binding|		|GO:0006979:response to oxidative stress|GO:0055114:oxidation-reduction process|
XLOC_021266	5[+]214596707-214609647	Capana05g002411,	4.26362	9.66768	-1.18109	0.0307	0.996326	Down	vvi:100233065	57	416	0	MLO13; MLO13 protein		|%IPR004326:Mlo-related protein :|		|GO:0016021:integral to membrane|	|GO:0006952:defense response|
XLOC_021279	5[+]215689472-215690674	Capana05g002450,	41.0818	90.5242	-1.1398	0.02155	0.996326	Down	vvi:100244210	32	90.1	3e-16	hypothetical protein LOC100244210
XLOC_021334	5[-]127968-129088	-	360.229	858.652	-1.25316	0.0083	0.774573	Down	rcu:RCOM_1108230	61	89	1e-16	hypothetical protein
XLOC_021339	5[-]210516-222706	Capana05g000031,	1.3911	0.274576	2.34095	0.00535	0.671798	Up	vvi:100243891	50	951	0	SOS1; salt overly sensitive 1		|%IPR006153:Cation/H+ exchanger :%IPR018418:Na+/H+ exchanger, isoforms 7/8|	|GO:0015299:solute:hydrogen antiporter activity|	|GO:0016021:integral to membrane|	|GO:0006812:cation transport|GO:0055085:transmembrane transport|
XLOC_021359	5[-]1443534-1453813	Capana05g000090,	2.37342	1.01187	1.22994	0.0333	0.996326	Up	rcu:RCOM_1215700	46	957	0	hypothetical protein		|%IPR011989:Armadillo-like helical :%IPR012978:Uncharacterised domain NUC173|	|GO:0005488:binding|
XLOC_021386	5[-]2777103-2777664	Capana05g000172,	6.86697	1.73059	1.98841	0.02275	0.996326	Up	ath:AT5G47550	56	124	3e-27	cysteine protease inhibitor, putative / cystatin, putative		|%IPR000010:Proteinase inhibitor I25, cystatin :%IPR020381:Proteinase inhibitor I25, cystatin, conserved region|	|GO:0004869:cysteine-type endopeptidase inhibitor activity|
XLOC_021411	5[-]3989188-3997535	Capana05g000245,	3.38083	1.23104	1.4575	0.0091	0.799324	Up	pop:POPTR_558490	57	1587	0	hypothetical protein		|%IPR001650:Helicase, C-terminal :%IPR002464:DNA/RNA helicase, ATP-dependent, DEAH-box type, conserved site|	|GO:0003676:nucleic acid binding|GO:0004386:helicase activity|GO:0005524:ATP binding|GO:0008026:ATP-dependent helicase activity|
XLOC_021421	5[-]6629580-6630619	-	38.1274	133.228	-1.80499	0.00055	0.287322	Down
XLOC_021422	5[-]6685726-6687773	-	9.77502	29.8651	-1.61129	0.0137	0.904534	Down
XLOC_021423	5[-]6693221-6697640	Capana05g000317,	12.0427	42.8505	-1.83116	0.00235	0.555365	Down
XLOC_021441	5[-]7616648-7620367	Capana05g000349,	30.3364	82.3662	-1.441	0.0076	0.746882	Down
XLOC_021459	5[-]8212640-8221193	Capana05g000381,	0.731873	0.260475	1.49045	0.03925	0.996326	Up	vvi:100244410	58	677	0	hypothetical protein LOC100244410		|%IPR005379:Uncharacterised domain XH :%IPR005380:XS domain|			|GO:0031047:gene silencing by RNA|
XLOC_021481	5[-]10086021-10088422	Capana05g000445,	0.526867	2.02903	-1.94528	0.0206	0.996326	Down	rcu:RCOM_0609070	75	250	2e-64	hypothetical protein
XLOC_021499	5[-]13704461-13710053	Capana05g000522,	28.2088	64.7305	-1.1983	0.0183	0.990762	Down	pop:POPTR_260821	43	249	4e-64	hypothetical protein		|%IPR004873:BURP domain :|
XLOC_021544	5[-]26527365-26543868	Capana05g000721,	2.47156	0.870201	1.506	0.01905	0.996326	Up	vvi:100251243	57	1494	0	hypothetical protein LOC100251243; K04498 E1A/CREB-binding protein [EC:2.3.1.48]	|Cellular Processes; Cell Communication; Adherens junction [PATH:ko04520-Map:ko04520];|Cellular Processes; Cell Growth and Death; Cell cycle [PATH:ko04110-Map:ko04110];|Environmental Information Processing; Signal Transduction; Jak-STAT signaling pathway [PATH:ko04630-Map:ko04630];|Environmental Information Processing; Signal Transduction; Notch signaling pathway [PATH:ko04330-Map:ko04330];|Envir…	|%IPR000197:Zinc finger, TAZ-type :%IPR011011:Zinc finger, FYVE/PHD-type|	|GO:0003712:transcription cofactor activity|GO:0004402:histone acetyltransferase activity|GO:0005515:protein binding|GO:0008270:zinc ion binding|	|GO:0005634:nucleus|	|GO:0006355:regulation of transcription, DNA-dependent|
XLOC_021566	5[-]32039066-32043353	-	6.667	16.0249	-1.2652	0.0272	0.996326	Down
XLOC_021603	5[-]37843550-37847721	Capana05g000947,	2.03737	7.1283	-1.80685	0.01405	0.91398	Down	rcu:RCOM_0837840	29	73.6	1e-11	hypothetical protein
XLOC_021605	5[-]40260787-40262172	Capana05g000959,	0	0.803112	-inf	5e-05	0.0875794	Down	vvi:100248577	49	237	9e-61	hypothetical protein LOC100248577		|%IPR004873:BURP domain :|
XLOC_021616	5[-]53627262-53635711	Capana05g001040,Capana05g001041,	2.37426	0.863748	1.4588	0.0168	0.954682	Up	vvi:100265458	49	353	5e-95	hypothetical protein LOC100265458		|%IPR001606:ARID/BRIGHT DNA-binding domain :|	|GO:0003677:DNA binding|	|GO:0005622:intracellular|
XLOC_021740	5[-]146376873-146380901	-	4.95571	10.968	-1.14614	0.0395	0.996326	Down
XLOC_021757	5[-]156645448-156649936	Capana05g001613,	23.5177	9.23435	1.34867	0.01545	0.93507	Up	vvi:100263665	81	496	1e-139	hypothetical protein LOC100263665		|%IPR000823:Plant peroxidase :%IPR002016:Haem peroxidase, plant/fungal/bacterial|	|GO:0004601:peroxidase activity|GO:0020037:heme binding|		|GO:0006979:response to oxidative stress|GO:0055114:oxidation-reduction process|
XLOC_021778	5[-]166933334-166943355	Capana05g001691,	7.82627	3.7107	1.07663	0.04055	0.996326	Up	vvi:100246661	84	1688	0	hypothetical protein LOC100246661; K12598 ATP-dependent RNA helicase DOB1 [EC:3.6.4.13]	|Genetic Information Processing; Folding, Sorting and Degradation; RNA degradation [PATH:ko03018-Map:ko03018];|Genetic Information Processing; Transcription; Spliceosome [BR:ko03041];|Genetic Information Processing; Translation; Ribosome Biogenesis [BR:ko03009];|	|%IPR001650:Helicase, C-terminal :%IPR011545:DNA/RNA helicase, DEAD/DEAH box type, N-terminal|	|GO:0003676:nucleic acid binding|GO:0004386:helicase activity|GO:0005524:ATP binding|GO:0008026:ATP-dependent helicase activity|GO:0016817:hydrolase activity, acting on acid anhydrides|GO:0016818:hydrolase activity, acting on acid anhydrides, in phosphorus-containing anhydrides|
XLOC_021781	5[-]169360188-169365214	-	0.382734	1.78022	-2.21764	0.04655	0.996326	Down
XLOC_021797	5[-]175823008-175826723	Capana05g001802,	11.8977	5.4902	1.11575	0.0321	0.996326	Up	vvi:100255961	43	382	1e-103	hypothetical protein LOC100255961
XLOC_021821	5[-]187792850-187793884	Capana05g001948,	46.6402	20.8277	1.16307	0.02605	0.996326	Up	vvi:100244163	47	219	3e-55	hypothetical protein LOC100244163		|%IPR001471:AP2/ERF domain :%IPR016177:DNA-binding domain|	|GO:0003677:DNA binding|GO:0003700:sequence-specific DNA binding transcription factor activity|		|GO:0006355:regulation of transcription, DNA-dependent|
XLOC_021858	5[-]198577700-198579664	Capana05g002102,	2.97664	0.752665	1.98361	0.00445	0.671798	Up	ath:AT2G24980	48	436	1e-120	proline-rich extensin-like family protein
XLOC_021867	5[-]200436127-200440558	Capana05g002144,	3.27067	7.92345	-1.27654	0.03755	0.996326	Down	rcu:RCOM_0732000	50	136	2e-30	hypothetical protein
XLOC_021870	5[-]200786594-200789195	Capana05g002149,	0.910132	6.97602	-2.93826	0.01545	0.93507	Down	vvi:100263768	47	107	4e-22	hypothetical protein LOC100263768
XLOC_021879	5[-]201229508-201232059	Capana05g002171,	3.12908	1.17795	1.40946	0.0381	0.996326	Up	vvi:100264928	69	694	0	hypothetical protein LOC100264928		|%IPR000743:Glycoside hydrolase, family 28 :%IPR006626:Parallel beta-helix repeat|	|GO:0004650:polygalacturonase activity|		|GO:0005975:carbohydrate metabolic process|
XLOC_021883	5[-]201330245-201335728	Capana05g002176,	4.38021	1.8918	1.21124	0.0314	0.996326	Up	pop:POPTR_570674	72	1137	0	GTC903; global transcription factor group		|%IPR000994:Peptidase M24, structural domain :%IPR013719:Domain of unknown function DUF1747|			|GO:0009987:cellular process|
XLOC_021919	5[-]206465071-206485741	Capana05g002287,	146.056	317.372	-1.11966	0.02005	0.996326	Down	pop:POPTR_847704	45	132	3e-29	hypothetical protein		|%IPR025886:Phloem protein 2-like :|
XLOC_021922	5[-]206788254-206813305	Capana05g002308,Capana05g002309,	4.54213	14.2455	-1.64906	0.00815	0.770421	Down	pop:POPTR_746481	37	91.7	5e-17	hypothetical protein		|%IPR002160:Proteinase inhibitor I3, Kunitz legume :%IPR011065:Kunitz inhibitor ST1-like|	|GO:0004866:endopeptidase inhibitor activity|
XLOC_021923	5[-]206881317-206889763	Capana05g002311,	2.25531	0.84678	1.41327	0.0342	0.996326	Up	vvi:100250375	43	362	7e-98	hypothetical protein LOC100250375
XLOC_021928	5[-]207629586-207631673	Capana05g002339,	1.39253	0.175993	2.98412	0.024	0.996326	Up	vvi:100242896	56	584	1e-164	hypothetical protein LOC100242896		|%IPR002213:UDP-glucuronosyl/UDP-glucosyltransferase :|	|GO:0016758:transferase activity, transferring hexosyl groups|		|GO:0008152:metabolic process|
XLOC_021944	5[-]213147968-213159334	Capana05g002395,	3.92101	1.42023	1.4651	0.0124	0.891872	Up	vvi:100265641	38	799	0	hypothetical protein LOC100265641
XLOC_021961	5[-]214996046-214998164	Capana05g002430,	0.797263	2.86685	-1.84634	0.0447	0.996326	Down	pop:POPTR_643153	51	241	4e-62	MYB220; hypothetical protein; K09422 myb proto-oncogene protein, plant	|Genetic Information Processing; Transcription; Transcription factors [BR:ko03000];|	|%IPR001005:SANT/Myb domain :%IPR009057:Homeodomain-like|	|GO:0003677:DNA binding|GO:0003682:chromatin binding|
XLOC_021968	5[-]215379568-215382949	-	26.295	55.7478	-1.08413	0.0474	0.996326	Down	vvi:100265295	61	90.9	4e-17	hypothetical protein LOC100265295
XLOC_022009	5[-]216954993-216956528	-	2.90927	0.89835	1.6953	0.04975	0.996326	Up	pop:POPTR_793704	36	115	9e-24	hypothetical protein
XLOC_022065	5[.]6636077-6637042	-	65.0633	145.217	-1.15829	0.01905	0.996326	Down
XLOC_022066	5[.]6648233-6649103	-	32.1807	74.2778	-1.20673	0.0179	0.98341	Down
XLOC_022080	5[.]8000401-8000948	-	7.73468	18.3354	-1.24522	0.0417	0.996326	Down
XLOC_022082	5[.]8057039-8057670	-	1.05126	4.73404	-2.17096	0.02875	0.996326	Down
XLOC_022086	5[.]8733327-8735387	-	3.25348	1.28541	1.33976	0.03625	0.996326	Up	vvi:100253074	48	244	1e-62	hypothetical protein LOC100253074
XLOC_022092	5[.]9665886-9667146	-	8.63323	3.36392	1.35976	0.0229	0.996326	Up	sbi:SORBI_06g012571	44	123	4e-57	hypothetical protein
XLOC_022099	5[.]12496737-12497474	-	16.7668	37.7846	-1.17219	0.03315	0.996326	Down
XLOC_022103	5[.]12847703-12849623	-	1.5773	3.8588	-1.29069	0.03625	0.996326	Down
XLOC_022105	5[.]13078586-13079208	-	1.67766	5.51382	-1.71661	0.0436	0.996326	Down	vvi:100252777	67	127	6e-28	hypothetical protein LOC100252777		|%IPR005123:Oxoglutarate/iron-dependent dioxygenase :%IPR027443:Isopenicillin N synthase-like|	|GO:0016491:oxidoreductase activity|GO:0016706:oxidoreductase activity, acting on paired donors, with incorporation or reduction of molecular oxygen, 2-oxoglutarate as one donor, and incorporation of one atom each of oxygen into both donors|		|GO:0055114:oxidation-reduction process|
XLOC_022141	5[.]29795916-29797386	-	2.39475	5.42706	-1.18029	0.0489	0.996326	Down
XLOC_022182	5[.]64426534-64427418	-	38.0476	82.2765	-1.11267	0.02485	0.996326	Down
XLOC_022189	5[.]68642776-68644239	-	1.38359	4.12551	-1.57616	0.0193	0.996326	Down
XLOC_021712	5[-]125215073-125222247	Capana05g001438,Capana05g001439,Capana05g001440,	0.00215149	1.18316	-9.1031	0.03885	0.91233	Down	rcu:RCOM_0490830	90	246	5e-63	hect ubiquitin-protein ligase, putative; K10590 E3 ubiquitin-protein ligase TRIP12 [EC:6.3.2.19]	|Genetic Information Processing; Folding, Sorting and Degradation; Ubiquitin mediated proteolysis [PATH:ko04120-Map:ko04120];|Genetic Information Processing; Folding, Sorting and Degradation; Ubiquitin system [BR:ko04121];|	|%IPR001360:Glycoside hydrolase, family 1 :%IPR011989:Armadillo-like helical|	|GO:0003824:catalytic activity|GO:0004553:hydrolase activity, hydrolyzing O-glycosyl compounds|GO:0005488:binding|		|GO:0005975:carbohydrate metabolic process|
XLOC_022272	5[.]170677412-170678655	-	2.53376	0.653065	1.95598	0.0216	0.996326	Up	vvi:100245340	49	137	1e-30	hypothetical protein LOC100245340		|%IPR001480:Bulb-type lectin domain :|
XLOC_022284	5[.]176042754-176043304	-	0.79924	0	inf	0.00555	0.671798	Up	vvi:100266892	54	185	2e-45	hypothetical protein LOC100266892		|%IPR002182:NB-ARC :|	|GO:0043531:ADP binding|
XLOC_022288	5[.]176171782-176172725	-	0.467764	0	inf	0.0017	0.466075	Up	vvi:100244934	48	225	3e-57	hypothetical protein LOC100244934
XLOC_022290	5[.]176608982-176609751	-	20.116	67.1758	-1.7396	0.00175	0.466075	Down
XLOC_022309	5[.]180617902-180620025	-	3.57659	7.74268	-1.11425	0.04635	0.996326	Down
XLOC_022342	5[.]202974834-202975773	-	1.40612	0.000725759	10.9199	0.0142	0.915224	Up										|GO:0055114:oxidation-reduction process|
XLOC_022471	6[+]1753250-1755338	Capana06g000130,	10.2907	23.3895	-1.18453	0.0292	0.996326	Down	rcu:RCOM_0463520	52	172	2e-88	1-aminocyclopropane-1-carboxylate oxidase, putative (EC:1.14.11.11)		|%IPR005123:Oxoglutarate/iron-dependent dioxygenase :%IPR026992:Non-haem dioxygenase N-terminal domain|	|GO:0016491:oxidoreductase activity|GO:0016706:oxidoreductase activity, acting on paired donors, with incorporation or reduction of molecular oxygen, 2-oxoglutarate as one donor, and incorporation of one atom each of oxygen into both donors|
XLOC_022472	6[+]1776488-1778201	Capana06g000131,	4.85032	16.8067	-1.79288	0.003	0.616076	Down	ath:AT1G06180	48	243	1e-62	ATMYB13 (MYB DOMAIN PROTEIN 13); DNA binding / transcription factor; K09422 myb proto-oncogene protein, plant	|Genetic Information Processing; Transcription; Transcription factors [BR:ko03000];|	|%IPR001005:SANT/Myb domain :%IPR009057:Homeodomain-like|	|GO:0003677:DNA binding|GO:0003682:chromatin binding|
XLOC_022505	6[+]2866052-2867298	Capana06g000217,	5.43346	16.038	-1.56155	0.0079	0.756393	Down	rcu:RCOM_1626590	51	269	3e-70	hypothetical protein
XLOC_022550	6[+]3918215-3925834	Capana06g000302,Capana06g000301,	0.531858	0	inf	0.0011	0.36803	Up										|GO:0008152:metabolic process|
XLOC_022587	6[+]5953616-5956689	Capana06g000408,	104.583	270.855	-1.37287	0.00525	0.671798	Down	pop:POPTR_706110	62	362	2e-98	hypothetical protein		|%IPR006439:HAD hydrolase, subfamily IA :%IPR010237:Pyrimidine 5-nucleotidase|	|GO:0016787:hydrolase activity|
XLOC_022600	6[+]6340955-6344776	-	280.358	138.699	1.01532	0.0325	0.996326	Up	vvi:100253562	94	1218	0	similar to HSC70-1 (heat shock cognate 70 kDa protein 1); ATP binding; K03283 heat shock 70kDa protein 1/8	|Cellular Processes; Transport and Catabolism; Endocytosis [PATH:ko04144-Map:ko04144];|Environmental Information Processing; Signal Transduction; MAPK signaling pathway [PATH:ko04010-Map:ko04010];|Genetic Information Processing; Folding, Sorting and Degradation; Chaperones and folding catalysts [BR:ko03110];|Genetic Information Processing; Folding, Sorting and Degradation; Proteasome [BR:ko03051]…	|%IPR013126:Heat shock protein 70 family :%IPR018181:Heat shock protein 70, conserved site|
XLOC_022602	6[+]6439140-6442683	Capana06g000437,	17.1577	7.30544	1.23181	0.01805	0.984386	Up	rcu:RCOM_0982910	60	922	0	hypothetical protein					|GO:0055085:transmembrane transport|
XLOC_022636	6[+]8115217-8118381	Capana06g000537,Capana06g000538,	34.9711	14.9999	1.22121	0.0156	0.936535	Up	vvi:100241340	84	798	0	hypothetical protein LOC100241340		|%IPR011701:Major facilitator superfamily :%IPR016196:Major facilitator superfamily domain, general substrate transporter|		|GO:0016021:integral to membrane|
XLOC_022673	6[+]9787679-9789675	Capana06g000634,	0.602736	0	inf	0.00555	0.671798	Up	vvi:100253764	63	270	1e-70	hypothetical protein LOC100253764		|%IPR002885:Pentatricopeptide repeat :%IPR011990:Tetratricopeptide-like helical|	|GO:0005515:protein binding|
XLOC_022710	6[+]11607807-11612602	Capana06g000728,	1.85845	5.32855	-1.51964	0.03095	0.996326	Down	ath:AT1G09340	83	652	0	CRB; CRB (CHLOROPLAST RNA BINDING); binding / catalytic/ coenzyme binding		|%IPR016040:NAD(P)-binding domain :|			|GO:0006810:transport|
XLOC_022757	6[+]13429500-13432190	Capana06g000852,	1.00227	0	inf	0.00385	0.639234	Up	pop:POPTR_811826	79	190	4e-47	aquaporin, MIP family, TIP subfamily		|%IPR000425:Major intrinsic protein :%IPR023271:Aquaporin-like|	|GO:0005215:transporter activity|	|GO:0016020:membrane|	|GO:0009308:amine metabolic process|GO:0055114:oxidation-reduction process|
XLOC_022776	6[+]16467585-16474197	Capana06g000932,	6.16907	2.80342	1.13786	0.04045	0.996326	Up	rcu:RCOM_1509320	80	1298	0	copper amine oxidase, putative; K00276 primary-amine oxidase [EC:1.4.3.21]	|Metabolism; Amino Acid Metabolism; Glycine, serine and threonine metabolism [PATH:ko00260-Map:ko00260];|Metabolism; Amino Acid Metabolism; Phenylalanine metabolism [PATH:ko00360-Map:ko00360];|Metabolism; Amino Acid Metabolism; Tyrosine metabolism [PATH:ko00350-Map:ko00350];|Metabolism; Biosynthesis of Other Secondary Metabolites; Isoquinoline alkaloid biosynthesis [PATH:ko00950-Map:ko00950];|Met…	|%IPR000269:Copper amine oxidase :%IPR015798:Copper amine oxidase, C-terminal|	|GO:0005507:copper ion binding|GO:0008131:primary amine oxidase activity|GO:0048038:quinone binding|		|GO:0045010:actin nucleation|
XLOC_022799	6[+]18022276-18037621	Capana06g001037,	0.593776	0	inf	0.0004	0.264684	Up	vvi:100251932	54	347	6e-94	hypothetical protein LOC100251932		|%IPR008973:C2 calcium/lipid-binding domain, CaLB :%IPR014020:Tensin phosphatase, C2 domain|	|GO:0005515:protein binding|	|GO:0005884:actin filament|
XLOC_022826	6[+]20044882-20046306	-	0.484758	2.02769	-2.0645	0.02245	0.996326	Down	vvi:100248489	29	74.3	8e-17	hypothetical protein LOC100248489
XLOC_022844	6[+]20959692-20961525	Capana06g001154,	1.71425	0.629703	1.44483	0.0474	0.996326	Up	vvi:100267019	52	289	5e-76	hypothetical protein LOC100267019		|%IPR001841:Zinc finger, RING-type :%IPR013083:Zinc finger, RING/FYVE/PHD-type|	|GO:0005515:protein binding|GO:0008270:zinc ion binding|
XLOC_022847	6[+]22062946-22066343	Capana06g001163,	9.46627	27.2597	-1.5259	0.00295	0.614281	Down	pop:POPTR_912404	45	76.6	2e-19	hypothetical protein
XLOC_022856	6[+]22365646-22366466	Capana06g001181,	11.2056	34.9253	-1.64005	0.0047	0.671798	Down	vvi:100246433	50	111	5e-23	hypothetical protein LOC100246433
XLOC_022861	6[+]22800822-22801590	Capana06g001202,	67.293	169.471	-1.33251	0.00705	0.739361	Down	pop:POPTR_742922	58	131	6e-29	hypothetical protein
XLOC_022866	6[+]24159025-24159742	-	69.0721	168.414	-1.28583	0.0128	0.892621	Down
XLOC_022870	6[+]24534234-24535817	Capana06g001251,	2.12719	10.0155	-2.2352	0.00045	0.275713	Down	vvi:100249745	46	110	2e-22	hypothetical protein LOC100249745
XLOC_022900	6[+]29514810-29516111	Capana06g001352,	18.092	62.7439	-1.79412	0.0021	0.52993	Down	vvi:100253160	47	82	2e-14	hypothetical protein LOC100253160					|GO:0006468:protein phosphorylation|
XLOC_022913	6[+]30499930-30509771	Capana06g001383,	1.27943	0.335346	1.93178	0.03325	0.996326	Up	rcu:RCOM_0685930	78	795	0	calcium-dependent protein kinase, putative (EC:2.7.11.17); K13412 calcium-dependent protein kinase [EC:2.7.11.1]	|Human Diseases; Infectious Diseases; Toxoplasmosis [PATH:ko05145-Map:ko05145];|Metabolism; Enzyme Families; Protein kinases [BR:ko01001];|Organismal Systems; Environmental Adaptation; Plant-pathogen interaction [PATH:ko04626-Map:ko04626];|	|%IPR000719:Protein kinase domain :%IPR002048:EF-hand domain|	|GO:0004672:protein kinase activity|GO:0004674:protein serine/threonine kinase activity|GO:0004713:protein tyrosine kinase activity|GO:0005509:calcium ion binding|GO:0005524:ATP binding|GO:0016772:transferase activity, transferring phosphorus-containing groups|
XLOC_023011	6[+]50385673-50387867	Capana06g001760,	4.69449	1.22623	1.93673	0.01275	0.892621	Up
XLOC_023046	6[+]64008301-64009854	Capana06g001928,	1.53029	3.84983	-1.33099	0.0391	0.996326	Down	pop:POPTR_726530	63	198	5e-53	hypothetical protein					|GO:0006952:defense response|
XLOC_023048	6[+]64480528-64498174	Capana06g001935,	15.7393	45.9949	-1.5471	0.00745	0.744425	Down	rcu:RCOM_1401100	73	883	0	Protein MLO, putative		|%IPR004326:Mlo-related protein :|		|GO:0016021:integral to membrane|
XLOC_023057	6[+]67401097-67403032	Capana06g001967,	27.8094	57.9213	-1.05852	0.03085	0.996326	Down	rcu:RCOM_1379730	55	537	1e-150	ATP binding protein, putative		|%IPR003593:AAA+ ATPase domain :%IPR003959:ATPase, AAA-type, core|	|GO:0000166:nucleotide binding|GO:0005524:ATP binding|GO:0017111:nucleoside-triphosphatase activity|
XLOC_023074	6[+]79207654-79210417	Capana06g002030,	6.07242	14.6419	-1.26976	0.02935	0.996326	Down	pop:POPTR_726467	88	266	2e-69	hypothetical protein; K13448 calcium-binding protein CML	|Organismal Systems; Environmental Adaptation; Plant-pathogen interaction [PATH:ko04626-Map:ko04626];|	|%IPR002048:EF-hand domain :%IPR011992:EF-hand domain pair|	|GO:0005509:calcium ion binding|
XLOC_023137	6[+]131557374-131567195	-	0.624986	2.03306	-1.70175	0.02435	0.996326	Down	rcu:RCOM_0941540	71	65.1	9e-12	Ubiquitin carboxyl-terminal hydrolase, putative (EC:3.1.2.15); K11838 ubiquitin carboxyl-terminal hydrolase 7 [EC:3.1.2.15]	|Genetic Information Processing; Folding, Sorting and Degradation; Ubiquitin system [BR:ko04121];|Metabolism; Enzyme Families; Peptidases [BR:ko01002];|
XLOC_023172	6[+]162914687-162916318	Capana06g002434,	18.6797	43.1322	-1.2073	0.0169	0.956713	Down	vvi:100265615	59	288	9e-76	hypothetical protein LOC100265615		|%IPR002347:Glucose/ribitol dehydrogenase :%IPR016040:NAD(P)-binding domain|	|GO:0016491:oxidoreductase activity|		|GO:0055114:oxidation-reduction process|
XLOC_023173	6[+]163009864-163014896	Capana06g002438,	9.76865	38.3229	-1.97198	0.0005	0.275713	Down	pop:POPTR_63589	49	491	1e-137	CYP87A7; cytochrome P450		|%IPR001128:Cytochrome P450 :%IPR002401:Cytochrome P450, E-class, group I|	|GO:0005506:iron ion binding|GO:0009055:electron carrier activity|GO:0016705:oxidoreductase activity, acting on paired donors, with incorporation or reduction of molecular oxygen|GO:0020037:heme binding|
XLOC_023179	6[+]165187347-165189410	Capana06g002458,	7.87093	20.1006	-1.35263	0.0144	0.920148	Down	vvi:100254931	39	160	2e-37	hypothetical protein LOC100254931		|%IPR011598:Myc-type, basic helix-loop-helix (bHLH) domain :%IPR015660:Achaete-scute transcription factor-related|	|GO:0003677:DNA binding|GO:0046983:protein dimerization activity|
XLOC_023186	6[+]168967283-168969124	-	0.682417	2.58484	-1.92135	0.0073	0.739361	Down
XLOC_023208	6[+]180952237-180953813	-	0.806887	10.8144	-3.74445	0.0001	0.13535	Down										|GO:0055114:oxidation-reduction process|
XLOC_023292	6[+]215985653-215990021	Capana06g002980,	1.05811	0.319698	1.7267	0.0319	0.996326	Up	vvi:100261685	76	670	0	hypothetical protein LOC100261685		|%IPR000103:Pyridine nucleotide-disulphide oxidoreductase, class-II :%IPR013027:FAD-dependent pyridine nucleotide-disulphide oxidoreductase|	|GO:0004499:N,N-dimethylaniline monooxygenase activity|GO:0016491:oxidoreductase activity|GO:0050660:flavin adenine dinucleotide binding|GO:0050661:NADP binding|		|GO:0008152:metabolic process|
XLOC_023317	6[+]217968827-217972733	Capana06g003043,	41.2124	20.324	1.0199	0.04325	0.996326	Up	pop:POPTR_552633	82	612	1e-173	hypothetical protein; K14493 gibberellin receptor GID1 [EC:3.-.-.-]	|Environmental Information Processing; Signal Transduction; Plant hormone signal transduction [PATH:ko04075-Map:ko04075];|	|%IPR002168:Lipase, GDXG, active site :%IPR013094:Alpha/beta hydrolase fold-3|	|GO:0016787:hydrolase activity|
XLOC_023323	6[+]218183902-218184990	Capana06g003057,	1.80309	5.08062	-1.49453	0.02685	0.996326	Down	pop:POPTR_947611	44	105	8e-21	hypothetical protein
XLOC_023356	6[-]773451-774113	-	0.733021	0	inf	0.0079	0.756393	Up	osa:4346366	43	89.7	9e-17	Os09g0101200		|%IPR008906:HAT dimerisation domain, C-terminal :%IPR012337:Ribonuclease H-like domain|	|GO:0003676:nucleic acid binding|GO:0046983:protein dimerization activity|
XLOC_023374	6[-]1211594-1213053	-	45.1257	102.767	-1.18735	0.0305	0.996326	Down
XLOC_023401	6[-]2495833-2514492	Capana06g000184,Capana06g000185,	1.90627	0.794262	1.26307	0.04635	0.996326	Up	rcu:RCOM_1719760	48	817	0	DNA binding protein, putative					|GO:0006807:nitrogen compound metabolic process|GO:0008152:metabolic process|
XLOC_023432	6[-]3748772-3755768	Capana06g000294,	17.0797	7.74911	1.14018	0.02975	0.996326	Up	vvi:100262205	83	1228	0	hypothetical protein LOC100262205; K01955 carbamoyl-phosphate synthase large subunit [EC:6.3.5.5]	|Metabolism; Amino Acid Metabolism; Alanine, aspartate and glutamate metabolism [PATH:ko00250-Map:ko00250];|Metabolism; Nucleotide Metabolism; Pyrimidine metabolism [PATH:ko00240-Map:ko00240];|	|%IPR005479:Carbamoyl-phosphate synthetase large subunit-like, ATP-binding domain :%IPR005480:Carbamoyl-phosphate synthetase, large subunit oligomerisation domain|	|GO:0003824:catalytic activity|GO:0005524:ATP binding|GO:0046872:metal ion binding|
XLOC_023448	6[-]4678993-4693143	Capana06g000337,	14.0391	6.09121	1.20465	0.0123	0.891872	Up	vvi:100244096	86	3816	0	hypothetical protein LOC100244096; K12854 pre-mRNA-splicing helicase BRR2 [EC:3.6.4.13]	|Genetic Information Processing; Transcription; Spliceosome [BR:ko03041];|Genetic Information Processing; Transcription; Spliceosome [PATH:ko03040-Map:ko03040];|	|%IPR001650:Helicase, C-terminal :%IPR003593:AAA+ ATPase domain|	|GO:0000166:nucleotide binding|GO:0003676:nucleic acid binding|GO:0004386:helicase activity|GO:0005524:ATP binding|GO:0008026:ATP-dependent helicase activity|GO:0017111:nucleoside-triphosphatase activity|
XLOC_023554	6[-]10035484-10036106	Capana06g000649,	8.59896	23.4452	-1.44706	0.01525	0.930531	Down	rcu:RCOM_0225950	57	121	4e-26	hypothetical protein
XLOC_023615	6[-]12639604-12641597	Capana06g000792,	4.31726	30.8636	-2.83772	5e-05	0.0875794	Down	vvi:100267921	56	280	2e-73	hypothetical protein LOC100267921		|%IPR004316:SWEET sugar transporter :|		|GO:0016021:integral to membrane|
XLOC_023616	6[-]12655891-12658127	Capana06g000793,	1.6297	4.42942	-1.44251	0.03395	0.996326	Down	vvi:100267921	59	299	2e-79	hypothetical protein LOC100267921		|%IPR004316:SWEET sugar transporter :|		|GO:0016021:integral to membrane|
XLOC_023625	6[-]13022023-13023366	Capana06g000819,	13.5481	3.98388	1.76585	0.00375	0.639234	Up	rcu:RCOM_1078930	41	229	5e-58	hypothetical protein		|%IPR000048:IQ motif, EF-hand binding site :%IPR003103:BAG domain|	|GO:0005515:protein binding|GO:0051087:chaperone binding|
XLOC_023627	6[-]13146226-13147757	Capana06g000828,	113.851	241.142	-1.08274	0.025	0.996326	Down	pop:POPTR_772268	39	126	2e-27	hypothetical protein		|%IPR006702:Uncharacterised protein family UPF0497, trans-membrane plant :|
XLOC_023632	6[-]13363177-13364179	Capana06g000842,	73.4425	173.437	-1.23972	0.01135	0.880127	Down	vvi:100246827	53	229	3e-58	hypothetical protein LOC100246827		|%IPR002160:Proteinase inhibitor I3, Kunitz legume :%IPR011065:Kunitz inhibitor ST1-like|	|GO:0004866:endopeptidase inhibitor activity|
XLOC_023686	6[-]17643234-17644825	-	14.0874	38.9089	-1.4657	0.0095	0.819946	Down	ath:AT1G74500	82	142	3e-32	bHLH family protein		|%IPR011598:Myc-type, basic helix-loop-helix (bHLH) domain :|	|GO:0046983:protein dimerization activity|
XLOC_023708	6[-]19297706-19300522	Capana06g001085,	18.9026	38.269	-1.01759	0.0446	0.996326	Down	rcu:RCOM_0727690	80	385	1e-105	amino acid binding protein, putative
XLOC_023740	6[-]22191467-22202110	Capana06g001172,	4.94927	2.27675	1.12024	0.0396	0.996326	Up	rcu:RCOM_0684820	59	1510	0	DNA binding protein, putative					|GO:0055114:oxidation-reduction process|
XLOC_023777	6[-]27730896-27733415	Capana06g001303,	9.61231	1.96951	2.28705	0.00035	0.254194	Up	pop:POPTR_548646	67	512	1e-143	GA3ox1; gibberellin 3-oxidase (EC:1.14.11.15); K04124 gibberellin 3-beta-dioxygenase [EC:1.14.11.15]	|Metabolism; Metabolism of Terpenoids and Polyketides; Diterpenoid biosynthesis [PATH:ko00904-Map:ko00904];|	|%IPR005123:Oxoglutarate/iron-dependent dioxygenase :%IPR026992:Non-haem dioxygenase N-terminal domain|	|GO:0016491:oxidoreductase activity|GO:0016706:oxidoreductase activity, acting on paired donors, with incorporation or reduction of molecular oxygen, 2-oxoglutarate as one donor, and incorporation of one atom each of oxygen into both donors|
XLOC_023814	6[-]30836034-30841260	Capana06g001398,	16.5197	8.18354	1.01339	0.04785	0.996326	Up	vvi:100252019	72	758	0	hypothetical protein LOC100252019		|%IPR002885:Pentatricopeptide repeat :%IPR021869:Ribonuclease Zc3h12a-like|
XLOC_023824	6[-]31857139-31861310	-	1.91524	5.13602	-1.42313	0.0188	0.996326	Down										|GO:0006355:regulation of transcription, DNA-dependent|
XLOC_023866	6[-]37875790-37878682	Capana06g001560,	1.06032	2.67421	-1.33461	0.0357	0.996326	Down	rcu:RCOM_0865060	59	401	1e-109	transcription factor, putative		|%IPR003441:NAC domain :|	|GO:0003677:DNA binding|		|GO:0006810:transport|
XLOC_023888	6[-]42655414-42657704	Capana06g001648,	246.58	535.281	-1.11824	0.01785	0.982476	Down	pop:POPTR_676397	85	435	1e-120	aquaporin, MIP family, TIP subfamily		|%IPR000425:Major intrinsic protein :%IPR022357:Major intrinsic protein, conserved site|	|GO:0005215:transporter activity|	|GO:0016020:membrane|
XLOC_023904	6[-]45745136-45745892	-	0.00199382	5.86489	-11.5223	0.02855	0.996326	Down
XLOC_023907	6[-]46330732-46335370	Capana06g001685,	27.5905	76.6664	-1.47442	0.004	0.640366	Down	pop:POPTR_1078656	58	291	5e-77	hypothetical protein		|%IPR004316:SWEET sugar transporter :|		|GO:0016021:integral to membrane|
XLOC_023918	6[-]48576987-48587234	Capana06g001729,	1.01289	0.401542	1.33486	0.04695	0.996326	Up	ath:AT1G21740	44	755	0	hypothetical protein					|GO:0045454:cell redox homeostasis|
XLOC_023942	6[-]59164505-59165119	Capana06g001864,	4.77768	19.6095	-2.03717	0.00225	0.555365	Down	vvi:100259665	69	140	4e-32	hypothetical protein LOC100259665		|%IPR002109:Glutaredoxin :%IPR011905:Glutaredoxin-like, plant II|	|GO:0009055:electron carrier activity|GO:0015035:protein disulfide oxidoreductase activity|
XLOC_023945	6[-]60273590-60285962	Capana06g001884,	13.5505	5.44722	1.31476	0.0117	0.88802	Up	vvi:100242745	65	1602	0	hypothetical protein LOC100242745; K03243 translation initiation factor eIF-5B	|Genetic Information Processing; Translation; RNA transport [PATH:ko03013-Map:ko03013];|Genetic Information Processing; Translation; Translation factors [BR:ko03012];|	|%IPR000795:Elongation factor, GTP-binding domain :%IPR004161:Translation elongation factor EFTu/EF1A, domain 2|	|GO:0003924:GTPase activity|GO:0005525:GTP binding|		|GO:0009616:virus induced gene silencing|
XLOC_023979	6[-]76070417-76080109	Capana06g002000,	5.36553	2.48503	1.11046	0.0432	0.996326	Up	vvi:100247679	64	1103	0	hypothetical protein LOC100247679		|%IPR026127:Probable RNA helicase SDE3 :%IPR027417:P-loop containing nucleoside triphosphate hydrolase|			|GO:0006468:protein phosphorylation|
XLOC_024011	6[-]89712722-89717863	Capana06g002102,	2.80484	7.02358	-1.32429	0.0315	0.996326	Down	vvi:100252772	73	429	1e-118	hypothetical protein LOC100252772		|%IPR000719:Protein kinase domain :%IPR002290:Serine/threonine- / dual specificity protein kinase, catalytic domain|	|GO:0004672:protein kinase activity|GO:0004674:protein serine/threonine kinase activity|GO:0004713:protein tyrosine kinase activity|GO:0005524:ATP binding|GO:0016772:transferase activity, transferring phosphorus-containing groups|		|GO:0000160:phosphorelay signal transduction system|GO:0006355:regulation of transcription, DNA-dependent|GO:0007165:signal transduction|GO:0009873:ethylene mediated signaling pathway|
XLOC_024036	6[-]104982972-104987723	Capana06g002186,	23.3901	11.0566	1.08099	0.0304	0.996326	Up	vvi:100254638	70	1044	0	hypothetical protein LOC100254638; K14509 ethylene receptor [EC:2.7.13.-]	|Environmental Information Processing; Signal Transduction; Plant hormone signal transduction [PATH:ko04075-Map:ko04075];|	|%IPR001789:Signal transduction response regulator, receiver domain :%IPR003018:GAF domain|	|GO:0000155:phosphorelay sensor kinase activity|GO:0000156:phosphorelay response regulator activity|GO:0004673:protein histidine kinase activity|GO:0004871:signal transducer activity|GO:0005515:protein binding|GO:0005524:ATP binding|	|GO:0005789:endoplasmic reticulum membrane|GO:0016020:membrane|	|GO:0006468:protein phosphorylation|
XLOC_024086	6[-]143963687-143968178	Capana06g002326,	4.67254	2.07579	1.17055	0.03585	0.996326	Up	vvi:100257029	72	1399	0	hypothetical protein LOC100257029		|%IPR000719:Protein kinase domain :%IPR001245:Serine-threonine/tyrosine-protein kinase catalytic domain|	|GO:0004672:protein kinase activity|GO:0004713:protein tyrosine kinase activity|GO:0005515:protein binding|GO:0005524:ATP binding|GO:0016772:transferase activity, transferring phosphorus-containing groups|
XLOC_024115	6[-]162734230-162736235	Capana06g002428,	8.79853	24.8775	-1.49951	0.00595	0.686718	Down	vvi:100259967	41	166	3e-39	hypothetical protein LOC100259967					|GO:0055114:oxidation-reduction process|
XLOC_024116	6[-]162820734-162823155	Capana06g002430,	12.7015	28.6187	-1.17196	0.0238	0.996326	Down	vvi:100259967	42	241	1e-61	hypothetical protein LOC100259967		|%IPR005123:Oxoglutarate/iron-dependent dioxygenase :%IPR027443:Isopenicillin N synthase-like|	|GO:0016491:oxidoreductase activity|GO:0016706:oxidoreductase activity, acting on paired donors, with incorporation or reduction of molecular oxygen, 2-oxoglutarate as one donor, and incorporation of one atom each of oxygen into both donors|		|GO:0055114:oxidation-reduction process|
XLOC_024119	6[-]162959039-162962813	Capana06g002437,	12.7356	27.5598	-1.1137	0.02995	0.996326	Down	rcu:RCOM_1386000	76	929	0	Cell elongation protein diminuto, putative; K09828 delta24-sterol reductase [EC:1.3.1.72]	|Metabolism; Lipid Metabolism; Steroid biosynthesis [PATH:ko00100-Map:ko00100];|	|%IPR006094:FAD linked oxidase, N-terminal :%IPR016166:FAD-binding, type 2|	|GO:0003824:catalytic activity|GO:0008762:UDP-N-acetylmuramate dehydrogenase activity|GO:0016491:oxidoreductase activity|GO:0016614:oxidoreductase activity, acting on CH-OH group of donors|GO:0050660:flavin adenine dinucleotide binding|		|GO:0006812:cation transport|GO:0006816:calcium ion transport|GO:0055085:transmembrane transport|
XLOC_024151	6[-]184707644-184717547	Capana06g002611,	2.8724	7.05575	-1.29654	0.0268	0.996326	Down	pop:POPTR_172311	76	592	1e-167	Ca2+ antiporter/cation exchanger		|%IPR004713:Calcium/proton exchanger :%IPR004798:Calcium/proton exchanger CAX|	|GO:0008324:cation transmembrane transporter activity|GO:0015369:calcium:hydrogen antiporter activity|	|GO:0016021:integral to membrane|
XLOC_024159	6[-]190194368-190244384	Capana06g002657,Capana06g002660,	4.47666	2.05621	1.12244	0.03595	0.996326	Up	vvi:100253599	74	2027	0	similar to ATP-dependent helicase; K12599 antiviral helicase SKI2 [EC:3.6.4.-]	|Genetic Information Processing; Folding, Sorting and Degradation; RNA degradation [PATH:ko03018-Map:ko03018];|	|%IPR001650:Helicase, C-terminal :%IPR011545:DNA/RNA helicase, DEAD/DEAH box type, N-terminal|	|GO:0003676:nucleic acid binding|GO:0004386:helicase activity|GO:0005524:ATP binding|GO:0008026:ATP-dependent helicase activity|GO:0016817:hydrolase activity, acting on acid anhydrides|GO:0016818:hydrolase activity, acting on acid anhydrides, in phosphorus-containing anhydrides|		|GO:0006468:protein phosphorylation|GO:0007165:signal transduction|
XLOC_024199	6[-]209970533-209972965	Capana06g002849,	45.4022	92.2578	-1.02291	0.0326	0.996326	Down	pop:POPTR_571888	60	525	1e-147	hypothetical protein		|%IPR000719:Protein kinase domain :%IPR002290:Serine/threonine- / dual specificity protein kinase, catalytic domain|	|GO:0004672:protein kinase activity|GO:0004674:protein serine/threonine kinase activity|GO:0004713:protein tyrosine kinase activity|GO:0005524:ATP binding|GO:0016772:transferase activity, transferring phosphorus-containing groups|
XLOC_024233	6[-]214349928-214354049	Capana06g002958,	2.17064	0.792965	1.45279	0.02895	0.996326	Up	vvi:100243107	79	963	0	hypothetical protein LOC100243107		|%IPR000210:BTB/POZ-like :%IPR011333:BTB/POZ fold|	|GO:0005515:protein binding|
XLOC_024239	6[-]216054280-216056132	-	13.6783	69.5829	-2.34685	5e-05	0.0875794	Down	vvi:100241271	73	161	4e-38	similar to Os04g0509400
XLOC_024289	6[.]1326301-1328700	-	0.793582	2.08634	-1.39452	0.0373	0.996326	Down	vvi:100257893	36	210	1e-74	hypothetical protein LOC100257893		|%IPR001878:Zinc finger, CCHC-type :|	|GO:0003676:nucleic acid binding|GO:0008270:zinc ion binding|
XLOC_024308	6[.]3223118-3224046	-	3.37941	8.7452	-1.37172	0.0287	0.996326	Down	mca:MCA1228	40	111	6e-23	TolA protein, putative; K03646 colicin import membrane protein	|Unclassified; Cellular Processes and Signaling; Pores ion channels|
XLOC_024329	6[.]5930004-5931283	-	1.40957	3.67273	-1.3816	0.0408	0.996326	Down	rcu:RCOM_0734910	50	93.6	3e-17	hypothetical protein
XLOC_024336	6[.]6615476-6616238	-	63.6255	128.281	-1.01163	0.0404	0.996326	Down
XLOC_024363	6[.]10341009-10341990	-	129.695	320.017	-1.30303	0.0068	0.739361	Down	pop:POPTR_1080059	55	189	3e-46	hypothetical protein; K13448 calcium-binding protein CML	|Organismal Systems; Environmental Adaptation; Plant-pathogen interaction [PATH:ko04626-Map:ko04626];|	|%IPR002048:EF-hand domain :%IPR011992:EF-hand domain pair|	|GO:0005509:calcium ion binding|
XLOC_024408	6[.]19752580-19753641	-	13.8725	29.5732	-1.09206	0.03845	0.996326	Down
XLOC_024422	6[.]26330454-26331481	-	8.78329	3.10235	1.5014	0.01595	0.941093	Up
XLOC_024443	6[.]32514093-32515997	-	4.75164	1.56483	1.60242	0.01105	0.872774	Up	vvi:100251909	47	536	1e-150	hypothetical protein LOC100251909		|%IPR021102:Peptide-N4-(N-acetyl-beta-glucosaminyl)asparagine amidase A :|
XLOC_024459	6[.]40128561-40129443	-	3.8067	17.3304	-2.18669	0.00085	0.351534	Down
XLOC_024468	6[.]45745133-45745886	-	5.02394	0.00250862	10.9677	0.0298	0.996326	Up
XLOC_024496	6[.]58328134-58330180	-	0.671558	2.32035	-1.78876	0.0125	0.892621	Down
XLOC_024508	6[.]64246553-64246966	-	0	1.46855	-inf	0.00345	0.639234	Down
XLOC_024534	6[.]91865441-91866770	-	12.9836	28.4678	-1.13264	0.0328	0.996326	Down
XLOC_024535	6[.]94176442-94177475	-	0.453534	2.56699	-2.50079	0.0309	0.996326	Down
XLOC_024556	6[.]112647394-112650080	-	4.38385	10.0373	-1.1951	0.0274	0.996326	Down
XLOC_024633	6[.]210573003-210573456	-	1.83315	0	inf	0.0004	0.264684	Up
XLOC_024634	6[.]211298966-211300693	-	4.58813	1.23747	1.89051	0.00405	0.641473	Up	rcu:RCOM_1749890	37	202	6e-56	hypothetical protein
XLOC_024645	6[.]213908535-213909074	-	5.84637	34.6593	-2.56763	0.00015	0.148885	Down	vvi:100250794	55	87.8	3e-16	hypothetical protein LOC100250794
XLOC_024657	6[.]216393410-216395094	-	0.812929	2.25564	-1.47234	0.0378	0.996326	Down										|GO:0006952:defense response|
XLOC_024679	6[.]219130258-219130912	-	0.687971	0	inf	0.00385	0.639234	Up	pop:POPTR_554585	38	152	1e-35	nbs-lrr resistance protein		|%IPR000767:Disease resistance protein :%IPR002182:NB-ARC|	|GO:0043531:ADP binding|
XLOC_024706	7[+]5352395-5353083	-	76.7016	233.923	-1.6087	0.0018	0.466075	Down										|GO:0007049:cell cycle|
XLOC_024707	7[+]5622756-5627719	Capana07g000110,	2.06527	0.735643	1.48925	0.0151	0.930531	Up	rcu:RCOM_1406220	60	1125	0	pentatricopeptide repeat-containing protein, putative		|%IPR002885:Pentatricopeptide repeat :%IPR004575:Cdk-activating kinase assembly factor MAT1/Tfb3|	|GO:0005515:protein binding|	|GO:0005634:nucleus|
XLOC_024736	7[+]9286018-9288517	Capana07g000198,	16.2508	3.97495	2.0315	0.00095	0.36803	Up	rcu:RCOM_0622750	71	517	1e-145	purine transporter, putative		|%IPR000620:Drug/metabolite transporter :%IPR004853:Triose-phosphate transporter domain|		|GO:0016020:membrane|	|GO:0006511:ubiquitin-dependent protein catabolic process|
XLOC_024738	7[+]9404629-9413523	Capana07g000204,	11.079	5.29339	1.06557	0.03875	0.996326	Up	vvi:100246880	50	828	0	hypothetical protein LOC100246880; K11855 ubiquitin carboxyl-terminal hydrolase 36/42 [EC:3.1.2.15]	|Genetic Information Processing; Folding, Sorting and Degradation; Ubiquitin system [BR:ko04121];|Metabolism; Enzyme Families; Peptidases [BR:ko01002];|	|%IPR001394:Ubiquitin carboxyl-terminal hydrolases family 2 :%IPR018200:Peptidase C19, ubiquitin carboxyl-terminal hydrolase 2, conserved site|	|GO:0004221:ubiquitin thiolesterase activity|		|GO:0006468:protein phosphorylation|
XLOC_024739	7[+]9431279-9435350	Capana07g000205,	4.6169	1.78162	1.37374	0.01275	0.892621	Up	vvi:100251401	73	1234	0	hypothetical protein LOC100251401		|%IPR000719:Protein kinase domain :%IPR001245:Serine-threonine/tyrosine-protein kinase catalytic domain|	|GO:0004672:protein kinase activity|GO:0004713:protein tyrosine kinase activity|GO:0005515:protein binding|GO:0005524:ATP binding|GO:0016772:transferase activity, transferring phosphorus-containing groups|		|GO:0006260:DNA replication|GO:0006270:DNA replication initiation|
XLOC_024761	7[+]11572039-11578091	Capana07g000266,	14.3895	6.95417	1.04906	0.0386	0.996326	Up	vvi:100261877	80	1205	0	hypothetical protein LOC100261877; K02209 minichromosome maintenance protein 5 (cell division control protein 46)	|Cellular Processes; Cell Growth and Death; Cell cycle - yeast [PATH:ko04111-Map:ko04111];|Cellular Processes; Cell Growth and Death; Cell cycle [PATH:ko04110-Map:ko04110];|Cellular Processes; Cell Growth and Death; Meiosis - yeast [PATH:ko04113-Map:ko04113];|Genetic Information Processing; Replication and Repair; DNA replication [PATH:ko03030-Map:ko03030];|Genetic Information Processing; Replica…	|%IPR001208:Mini-chromosome maintenance, DNA-dependent ATPase :%IPR008048:DNA replication licensing factor Mcm|	|GO:0003677:DNA binding|GO:0003678:DNA helicase activity|GO:0005524:ATP binding|	|GO:0005634:nucleus|GO:0042555:MCM complex|
XLOC_024869	7[+]79075702-79077594	Capana07g000750,	471.764	1190.16	-1.33502	0.00395	0.639235	Down	ath:AT1G19180	61	72.4	6e-11	JAZ1; JAZ1 (JASMONATE-ZIM-DOMAIN PROTEIN 1); protein binding; K13464 jasmonate ZIM domain-containing protein	|Environmental Information Processing; Signal Transduction; Plant hormone signal transduction [PATH:ko04075-Map:ko04075];|Organismal Systems; Environmental Adaptation; Plant-pathogen interaction [PATH:ko04626-Map:ko04626];|	|%IPR018467:CO/COL/TOC1, conserved site :|			|GO:0044267:cellular protein metabolic process|
XLOC_024933	7[+]130856348-130875035	Capana07g000977,	1.70921	0.571437	1.58066	0.02035	0.996326	Up	vvi:100267980	59	1058	0	hypothetical protein LOC100267980; K00921 1-phosphatidylinositol-3-phosphate 5-kinase [EC:2.7.1.150]	|Cellular Processes; Cell Motility; Regulation of actin cytoskeleton [PATH:ko04810-Map:ko04810];|Cellular Processes; Transport and Catabolism; Phagosome [PATH:ko04145-Map:ko04145];|Environmental Information Processing; Signal Transduction; Phosphatidylinositol signaling system [PATH:ko04070-Map:ko04070];|Metabolism; Carbohydrate Metabolism; Inositol phosphate metabolism [PATH:ko00562-Map:ko00562]…	|%IPR002423:Chaperonin Cpn60/TCP-1 :%IPR027409:GroEL-like apical domain|	|GO:0005524:ATP binding|		|GO:0007264:small GTPase mediated signal transduction|GO:0015031:protein transport|
XLOC_025046	7[+]184426986-184430584	Capana07g001452,	28.9917	68.7117	-1.24492	0.01195	0.891836	Down	vvi:100244716	56	326	3e-87	hypothetical protein LOC100244716		|%IPR001806:Small GTPase superfamily :%IPR003579:Small GTPase superfamily, Rab type|	|GO:0005525:GTP binding|	|GO:0005622:intracellular|
XLOC_025069	7[+]189755769-189757697	Capana07g001537,	1.34824	0.21126	2.67399	0.0262	0.996326	Up	vvi:100248290	72	636	1e-180	hypothetical protein LOC100248290		|%IPR005202:Transcription factor GRAS :|
XLOC_025081	7[+]192576213-192578151	Capana07g001604,	21.7591	47.6788	-1.13173	0.02065	0.996326	Down	pop:POPTR_834662	47	175	1e-41	MYB049; hypothetical protein; K09422 myb proto-oncogene protein, plant	|Genetic Information Processing; Transcription; Transcription factors [BR:ko03000];|	|%IPR001005:SANT/Myb domain :%IPR009057:Homeodomain-like|	|GO:0003677:DNA binding|GO:0003682:chromatin binding|
XLOC_025091	7[+]196051104-196057668	Capana07g001671,Capana07g001672,	1.06473	0.3611	1.56002	0.02345	0.996326	Up	vvi:100244720	69	1199	0	hypothetical protein LOC100244720		|%IPR002885:Pentatricopeptide repeat :%IPR011990:Tetratricopeptide-like helical|	|GO:0005515:protein binding|
XLOC_025102	7[+]198162536-198173866	-	4.06449	9.70558	-1.25574	0.02745	0.996326	Down	pop:POPTR_789883	91	89.4	6e-16	hypothetical protein
XLOC_025169	7[+]209094038-209101532	Capana07g001932,	1.13432	0.424189	1.41904	0.0368	0.996326	Up	vvi:100255858	25	198	3e-48	hypothetical protein LOC100255858					|GO:0008152:metabolic process|
XLOC_025179	7[+]209921981-209932052	Capana07g001962,	5.44703	12.2304	-1.16693	0.03045	0.996326	Down	pop:POPTR_559475	71	769	0	hypothetical protein; K13508 glycerol-3-phosphate acyltransferase [EC:2.3.1.15]	|Metabolism; Lipid Metabolism; Glycerolipid metabolism [PATH:ko00561-Map:ko00561];|Metabolism; Lipid Metabolism; Glycerophospholipid metabolism [PATH:ko00564-Map:ko00564];|Metabolism; Lipid Metabolism; Lipid biosynthesis proteins [BR:ko01004];|	|%IPR002123:Phospholipid/glycerol acyltransferase :|	|GO:0016746:transferase activity, transferring acyl groups|		|GO:0006075:(1-&gt;3)-beta-D-glucan biosynthetic process|
XLOC_025181	7[+]210222456-210250039	Capana07g001970,Capana07g001971,	2.1149	0.446277	2.24458	0.0038	0.639234	Up	vvi:100242081	79	1752	0	hypothetical protein LOC100242081; K11000 callose synthase [EC:2.4.1.-]	|Metabolism; Glycan Biosynthesis and Metabolism; Glycosyltransferases [BR:ko01003];|	|%IPR003440:Glycosyl transferase, family 48 :%IPR026953:Callose synthase|	|GO:0003843:1,3-beta-D-glucan synthase activity|	|GO:0000148:1,3-beta-D-glucan synthase complex|GO:0016020:membrane|
XLOC_025184	7[+]210334632-210336596	Capana07g001979,	1.17569	4.78662	-2.0255	0.02575	0.996326	Down
XLOC_025186	7[+]210362339-210363579	-	1.63063	7.82703	-2.26304	0.00595	0.686718	Down	vvi:100242530	37	87.4	6e-16	hypothetical protein LOC100242530					|GO:0006075:(1-&gt;3)-beta-D-glucan biosynthetic process|
XLOC_025202	7[+]212163825-212178547	Capana07g002034,	1.1815	0.176196	2.74537	0.0407	0.996326	Up	vvi:100248372	74	2111	0	hypothetical protein LOC100248372; K11000 callose synthase [EC:2.4.1.-]	|Metabolism; Glycan Biosynthesis and Metabolism; Glycosyltransferases [BR:ko01003];|	|%IPR003440:Glycosyl transferase, family 48 :%IPR026953:Callose synthase|	|GO:0003843:1,3-beta-D-glucan synthase activity|	|GO:0000148:1,3-beta-D-glucan synthase complex|GO:0016020:membrane|
XLOC_025246	7[+]215406162-215414678	Capana07g002154,	3.09521	1.31364	1.23647	0.02215	0.996326	Up	vvi:100243511	56	1491	0	hypothetical protein LOC100243511		|%IPR003593:AAA+ ATPase domain :%IPR003959:ATPase, AAA-type, core|	|GO:0000166:nucleotide binding|GO:0005524:ATP binding|GO:0017111:nucleoside-triphosphatase activity|
XLOC_025263	7[+]216006721-216015205	Capana07g002195,	5.29158	26.8875	-2.34517	0.0004	0.264684	Down	vvi:100255559	53	268	8e-70	hypothetical protein LOC100255559		|%IPR001841:Zinc finger, RING-type :%IPR013083:Zinc finger, RING/FYVE/PHD-type|	|GO:0005515:protein binding|GO:0008270:zinc ion binding|
XLOC_025307	7[+]218885895-218886499	Capana07g002334,	376.194	755.45	-1.00586	0.0313	0.996326	Down	vvi:100258895	46	100	6e-20	hypothetical protein LOC100258895		|%IPR016140:Bifunctional inhibitor/plant lipid transfer protein/seed storage helical domain :|
XLOC_025321	7[+]219721906-219739159	Capana07g002391,	9.1602	3.73646	1.29371	0.00705	0.739361	Up	vvi:100246297	70	5196	0	similar to E3 ubiquitin-protein ligase UPL1; K10592 E3 ubiquitin-protein ligase HUWE1 [EC:6.3.2.19]	|Genetic Information Processing; Folding, Sorting and Degradation; Ubiquitin mediated proteolysis [PATH:ko04120-Map:ko04120];|Genetic Information Processing; Folding, Sorting and Degradation; Ubiquitin system [BR:ko04121];|	|%IPR000449:Ubiquitin-associated domain/translation elongation factor EF-Ts, N-terminal :%IPR000569:HECT|	|GO:0004842:ubiquitin-protein ligase activity|GO:0005488:binding|GO:0005515:protein binding|
XLOC_025343	7[+]220194827-220198101	Capana07g002431,	14.4543	29.1409	-1.01155	0.037	0.996326	Down	vvi:100254980	70	340	3e-91	hypothetical protein LOC100254980		|%IPR013057:Amino acid transporter, transmembrane :|
XLOC_025364	7[+]221225867-221234777	Capana07g002478,	14.4683	6.43531	1.16882	0.0204	0.996326	Up	pop:POPTR_580503	63	1011	0	hypothetical protein; K14552 NET1-associated nuclear protein 1 (U3 small nucleolar RNA-associated protein 17)	|Genetic Information Processing; Translation; Ribosome Biogenesis [BR:ko03009];|Genetic Information Processing; Translation; Ribosome biogenesis in eukaryotes [PATH:ko03008-Map:ko03008];|	|%IPR001680:WD40 repeat :%IPR015943:WD40/YVTN repeat-like-containing domain|	|GO:0005515:protein binding|
XLOC_025397	7[-]3883032-3884213	Capana07g000067,	13.8933	5.91706	1.23144	0.03	0.996326	Up	rcu:RCOM_0730190	49	147	2e-33	hypothetical protein					|GO:0006952:defense response|
XLOC_025407	7[-]5125380-5126141	Capana07g000107,	31.0821	84.1102	-1.4362	0.01155	0.88802	Down							|%IPR003614:Knottin, scorpion toxin-like :%IPR008176:Gamma thionin|			|GO:0006351:transcription, DNA-dependent|
XLOC_025408	7[-]5639247-5650860	Capana07g000112,	3.35876	1.55569	1.11038	0.0406	0.996326	Up	vvi:100250202	75	1405	0	hypothetical protein LOC100250202; K10908 DNA-directed RNA polymerase, mitochondrial [EC:2.7.7.6]	|Unclassified; Genetic Information Processing; Transcription related proteins|	|%IPR002092:DNA-directed RNA polymerase, phage-type :%IPR024075:DNA-directed RNA polymerase, helix hairpin domain|	|GO:0003677:DNA binding|GO:0003899:DNA-directed RNA polymerase activity|		|GO:0006508:proteolysis|
XLOC_025425	7[-]8841656-8857585	Capana07g000176,	7.66159	21.8726	-1.51341	0.01325	0.896005	Down	rcu:RCOM_0623820	73	721	0	serine carboxypeptidase, putative (EC:3.4.16.6)		|%IPR001563:Peptidase S10, serine carboxypeptidase :%IPR018202:Peptidase S10, serine carboxypeptidase, active site|	|GO:0004185:serine-type carboxypeptidase activity|		|GO:0000160:phosphorelay signal transduction system|GO:0006355:regulation of transcription, DNA-dependent|
XLOC_025440	7[-]10635405-10641265	Capana07g000238,Capana07g000239,	14.9229	6.79497	1.13499	0.0281	0.996326	Up	vvi:100259369	69	514	1e-143	hypothetical protein LOC100259369; K14491 two-component response regulator ARR-B family	|Environmental Information Processing; Signal Transduction; Plant hormone signal transduction [PATH:ko04075-Map:ko04075];|	|%IPR001005:SANT/Myb domain :%IPR001789:Signal transduction response regulator, receiver domain|	|GO:0000156:phosphorelay response regulator activity|GO:0003677:DNA binding|GO:0003682:chromatin binding|
XLOC_025483	7[-]28369551-28374171	Capana07g000417,	6.91709	1.93758	1.83591	0.00575	0.679435	Up	rcu:RCOM_1076050	46	216	3e-54	hypothetical protein					|GO:0000398:mRNA splicing, via spliceosome|
XLOC_025504	7[-]43291342-43305897	Capana07g000545,	17.867	7.97177	1.16433	0.018	0.984386	Up	pop:POPTR_592707	95	4679	0	hypothetical protein; K12856 pre-mRNA-processing factor 8	|Genetic Information Processing; Transcription; Spliceosome [BR:ko03041];|Genetic Information Processing; Transcription; Spliceosome [PATH:ko03040-Map:ko03040];|	|%IPR000555:JAB/MPN domain :%IPR012591:PRO8NT domain|	|GO:0003723:RNA binding|GO:0005515:protein binding|GO:0017070:U6 snRNA binding|GO:0030623:U5 snRNA binding|	|GO:0005681:spliceosomal complex|
XLOC_025525	7[-]58521239-58542895	Capana07g000637,Capana07g000638,	16.1586	7.55582	1.09664	0.02795	0.996326	Up	vvi:100257035	63	1556	0	hypothetical protein LOC100257035		|%IPR011989:Armadillo-like helical :%IPR012978:Uncharacterised domain NUC173|	|GO:0005488:binding|		|GO:0006812:cation transport|
XLOC_025545	7[-]81581350-81588836	Capana07g000754,	15.7447	7.44763	1.08001	0.03465	0.996326	Up	vvi:100243678	64	597	1e-168	hypothetical protein LOC100243678; K01534 Cd2+/Zn2+-exporting ATPase [EC:3.6.3.3 3.6.3.5]	|Unclassified; Metabolism; Energy metabolism|	|%IPR001757:Cation-transporting P-type ATPase :%IPR008250:P-type ATPase, A domain|	|GO:0000166:nucleotide binding|GO:0019829:cation-transporting ATPase activity|GO:0046872:metal ion binding|	|GO:0016021:integral to membrane|
XLOC_025597	7[-]142674222-142681590	Capana07g001024,	24.526	12.0302	1.02765	0.0357	0.996326	Up	vvi:100250610	69	784	0	hypothetical protein LOC100250610		|%IPR001650:Helicase, C-terminal :%IPR011545:DNA/RNA helicase, DEAD/DEAH box type, N-terminal|	|GO:0003676:nucleic acid binding|GO:0004386:helicase activity|GO:0005524:ATP binding|GO:0008026:ATP-dependent helicase activity|
XLOC_025652	7[-]169642952-169645657	Capana07g001288,	235.674	513.273	-1.12293	0.01785	0.982476	Down	vvi:100258038	57	472	1e-131	hypothetical protein LOC100258038		|%IPR005018:DOMON domain :%IPR006593:Cytochrome b561/ferric reductase transmembrane|
XLOC_025658	7[-]171544635-171545437	-	41.8485	92.0365	-1.13703	0.0238	0.996326	Down
XLOC_025708	7[-]188155386-188156745	Capana07g001512,	0.645685	0	inf	0.00555	0.671798	Up	vvi:100248221	48	198	2e-49	hypothetical protein LOC100248221		|%IPR002885:Pentatricopeptide repeat :|
XLOC_025710	7[-]189301419-189302487	Capana07g001529,	1.18003	0	inf	0.00555	0.671798	Up	vvi:100246563	60	78.2	2e-13	hypothetical protein LOC100246563
XLOC_025711	7[-]189303011-189316523	Capana07g001530,	4.20717	1.28395	1.71226	0.00175	0.466075	Up	vvi:100263702	58	2683	0	hypothetical protein LOC100263702		|%IPR001214:SET domain :%IPR001810:F-box domain|	|GO:0005515:protein binding|
XLOC_025712	7[-]189648455-189649370	-	25.4564	8.97091	1.5047	0.0126	0.892621	Up
XLOC_025722	7[-]191818171-191825881	Capana07g001591,	7.47498	3.34996	1.15793	0.0467	0.996326	Up	vvi:100259117	57	336	3e-90	hypothetical protein LOC100259117
XLOC_025729	7[-]192826210-192828487	Capana07g001606,	2.01567	6.65029	-1.72215	0.01235	0.891872	Down	pop:POPTR_780893	39	109	4e-35	MYB065; hypothetical protein; K09422 myb proto-oncogene protein, plant	|Genetic Information Processing; Transcription; Transcription factors [BR:ko03000];|	|%IPR001005:SANT/Myb domain :%IPR009057:Homeodomain-like|	|GO:0003677:DNA binding|GO:0003682:chromatin binding|
XLOC_025730	7[-]192864100-192865954	Capana07g001609,	6.34036	19.6294	-1.63038	0.00525	0.671798	Down	pop:POPTR_780893	46	214	1e-53	MYB065; hypothetical protein; K09422 myb proto-oncogene protein, plant	|Genetic Information Processing; Transcription; Transcription factors [BR:ko03000];|	|%IPR001005:SANT/Myb domain :%IPR009057:Homeodomain-like|	|GO:0003677:DNA binding|GO:0003682:chromatin binding|		|GO:0019953:sexual reproduction|
XLOC_025749	7[-]196431730-196438895	Capana07g001680,	7.04899	2.78394	1.34029	0.0332	0.996326	Up	rcu:RCOM_1175460	78	434	1e-120	Beta-expansin 3 precursor, putative		|%IPR005795:Major pollen allergen Lol pI :%IPR007112:Expansin/pollen allergen, DPBB domain|		|GO:0005576:extracellular region|
XLOC_025759	7[-]198240855-198250215	Capana07g001716,	49.2218	105.349	-1.09781	0.0251	0.996326	Down	pop:POPTR_594652	72	408	1e-112	hypothetical protein		|%IPR001932:Protein phosphatase 2C (PP2C)-like domain :%IPR015655:Protein phosphatase 2C|	|GO:0003824:catalytic activity|
XLOC_025761	7[-]198524076-198527148	Capana07g001731,	3.46134	11.2726	-1.70342	0.00885	0.795842	Down	vvi:100245363	54	186	2e-45	hypothetical protein LOC100245363		|%IPR004333:Transcription factor, SBP-box :%IPR017238:Squamosa promoter-binding protein|	|GO:0003677:DNA binding|	|GO:0005634:nucleus|
XLOC_025765	7[-]198964963-198966385	Capana07g001743,	3.69003	12.0181	-1.7035	0.0053	0.671798	Down	pop:POPTR_928996	49	288	5e-76	hypothetical protein					|GO:0006351:transcription, DNA-dependent|GO:0006355:regulation of transcription, DNA-dependent|
XLOC_025771	7[-]199836529-199855667	Capana07g001756,Capana07g001757,	5.27365	2.62215	1.00805	0.04295	0.996326	Up	vvi:100250601	58	1888	0	hypothetical protein LOC100250601		|%IPR001356:Homeobox domain :%IPR004022:DDT domain|	|GO:0003677:DNA binding|GO:0003700:sequence-specific DNA binding transcription factor activity|GO:0043565:sequence-specific DNA binding|
XLOC_025779	7[-]203457424-203458498	Capana07g001790,	6.52573	14.2013	-1.12181	0.049	0.996326	Down	rcu:RCOM_0554190	52	226	2e-57	ring finger protein, putative		|%IPR001841:Zinc finger, RING-type :%IPR013083:Zinc finger, RING/FYVE/PHD-type|	|GO:0005515:protein binding|GO:0008270:zinc ion binding|		|GO:0055114:oxidation-reduction process|
XLOC_025803	7[-]206864363-206877062	-	2.51059	7.63664	-1.60491	0.03235	0.996326	Down	vvi:100250517	51	150	3e-34	hypothetical protein LOC100250517		|%IPR001128:Cytochrome P450 :|	|GO:0005506:iron ion binding|GO:0009055:electron carrier activity|GO:0016705:oxidoreductase activity, acting on paired donors, with incorporation or reduction of molecular oxygen|GO:0020037:heme binding|
XLOC_025844	7[-]210962999-210979008	-	1.44589	6.01397	-2.05636	0.0404	0.996326	Down										|GO:0005992:trehalose biosynthetic process|
XLOC_025864	7[-]212514948-212534073	Capana07g002060,	15.5564	7.03375	1.14514	0.02745	0.996326	Up	rcu:RCOM_0493750	82	1518	0	trehalose-6-phosphate synthase, putative (EC:2.4.1.15 3.1.3.12); K00697 alpha,alpha-trehalose-phosphate synthase (UDP-forming) [EC:2.4.1.15]	|Metabolism; Carbohydrate Metabolism; Starch and sucrose metabolism [PATH:ko00500-Map:ko00500];|Metabolism; Glycan Biosynthesis and Metabolism; Glycosyltransferases [BR:ko01003];|	|%IPR001830:Glycosyl transferase, family 20 :%IPR003337:Trehalose-phosphatase|	|GO:0003824:catalytic activity|GO:0003825:alpha,alpha-trehalose-phosphate synthase (UDP-forming) activity|
XLOC_025878	7[-]213540321-213542528	Capana07g002099,	2.53219	0.976715	1.37437	0.0357	0.996326	Up	vvi:100248749	67	805	0	hypothetical protein LOC100248749
XLOC_025886	7[-]214237532-214250326	Capana07g002132,	5.84773	2.82423	1.05002	0.03755	0.996326	Up	vvi:100248637	43	937	0	hypothetical protein LOC100248637
XLOC_025894	7[-]215347264-215349602	Capana07g002152,	7.54589	16.9452	-1.16711	0.03515	0.996326	Down	rcu:RCOM_0649740	29	129	4e-28	hypothetical protein
XLOC_025904	7[-]215822106-215827980	Capana07g002182,	48.265	23.0842	1.06407	0.02775	0.996326	Up	vvi:100267528	55	549	1e-177	hypothetical protein LOC100267528					|GO:0007017:microtubule-based process|
XLOC_025908	7[-]215987892-215989378	Capana07g002193,	2.57576	6.63694	-1.36552	0.04055	0.996326	Down	vvi:100257280	71	153	1e-35	hypothetical protein LOC100257280		|%IPR001372:Dynein light chain, type 1/2 :|		|GO:0005875:microtubule associated complex|
XLOC_025928	7[-]217166968-217167568	Capana07g002250,	3.52964	11.1452	-1.65883	0.01665	0.952636	Down	vvi:100252031	77	166	9e-40	hypothetical protein LOC100252031		|%IPR002048:EF-hand domain :%IPR011992:EF-hand domain pair|	|GO:0005509:calcium ion binding|
XLOC_025955	7[-]218931637-218935818	Capana07g002339,	2.52447	8.93458	-1.82342	0.0034	0.639234	Down	vvi:100241784	79	471	1e-131	hypothetical protein LOC100241784; K06911	|Unclassified; Poorly Characterized; General function prediction only|	|%IPR003829:Pirin, N-terminal domain :%IPR008778:Pirin, C-terminal domain|			|GO:0007018:microtubule-based movement|
XLOC_025990	7[-]220035492-220047367	Capana07g002416,	4.25464	1.7257	1.30186	0.01885	0.996326	Up	pop:POPTR_828145	65	1426	0	hypothetical protein		|%IPR001715:Calponin homology domain :%IPR001752:Kinesin, motor domain|	|GO:0003777:microtubule motor activity|GO:0005515:protein binding|GO:0005524:ATP binding|GO:0008017:microtubule binding|	|GO:0005871:kinesin complex|
XLOC_025994	7[-]220318110-220344448	Capana07g002433,	13.5946	6.63165	1.0356	0.02885	0.996326	Up	rcu:RCOM_0415020	73	2662	0	hypothetical protein; K06699 proteasome activator subunit 4	|Genetic Information Processing; Folding, Sorting and Degradation; Proteasome [BR:ko03051];|Genetic Information Processing; Folding, Sorting and Degradation; Proteasome [PATH:ko03050-Map:ko03050];|	|%IPR011989:Armadillo-like helical :%IPR016024:Armadillo-type fold|	|GO:0005488:binding|
XLOC_026102	7[.]24704082-24705487	-	1.33914	3.90015	-1.54222	0.022	0.996326	Down
XLOC_026170	7[.]122275384-122277587	-	1.65864	4.7219	-1.50936	0.01415	0.91398	Down
XLOC_026245	7[.]194998895-194999649	-	2.23194	0.00023389	13.2202	0.02775	0.996326	Up
XLOC_026259	7[.]203881388-203882350	-	9.96601	2.28451	2.12513	0.0016	0.466075	Up
XLOC_026319	7[.]217860436-217860977	-	1.39217	5.74407	-2.04474	0.034	0.996326	Down
XLOC_026320	7[.]218605679-218606886	-	3.97299	1.5399	1.36739	0.04225	0.996326	Up	rcu:RCOM_0752610	50	145	5e-33	hypothetical protein
XLOC_026332	7[.]220582966-220583267	-	0	3.09879	-inf	0.00155	0.461544	Down	vvi:100244592	61	69.3	8e-17	hypothetical protein LOC100244592
XLOC_026340	7[.]222089066-222089448	-	8.67784	23.5833	-1.44236	0.0286	0.996326	Down
XLOC_026358	8[+]852945-857571	-	8.77321	22.513	-1.35958	0.0145	0.922578	Down	pop:POPTR_829396	62	237	8e-61	hypothetical protein					|GO:0006812:cation transport|GO:0055085:transmembrane transport|
XLOC_026396	8[+]2067679-2083991	Capana08g000122,	8.70332	4.30331	1.01612	0.0391	0.996326	Up	vvi:100243891	69	1549	0	SOS1; salt overly sensitive 1		|%IPR000595:Cyclic nucleotide-binding domain :%IPR006153:Cation/H+ exchanger|	|GO:0015299:solute:hydrogen antiporter activity|	|GO:0016021:integral to membrane|	|GO:0006952:defense response|
XLOC_026399	8[+]2166924-2168425	-	1101.88	2403.31	-1.12505	0.01635	0.947187	Down	ath:AT2G02100	66	110	3e-23	LCR69; LCR69 (LOW-MOLECULAR-WEIGHT CYSTEINE-RICH 69); peptidase inhibitor		|%IPR003614:Knottin, scorpion toxin-like :%IPR008176:Gamma thionin|
XLOC_026521	8[+]99061520-99063911	-	0.2316	1.19811	-2.37105	0.04895	0.996326	Down										|GO:0006355:regulation of transcription, DNA-dependent|
XLOC_026528	8[+]101219385-101222225	Capana08g000683,	1.08652	5.60312	-2.36651	0.0051	0.671798	Down	vvi:100264507	46	227	9e-58	hypothetical protein LOC100264507		|%IPR003657:DNA-binding WRKY :|	|GO:0003700:sequence-specific DNA binding transcription factor activity|GO:0043565:sequence-specific DNA binding|
XLOC_026546	8[+]109446150-109447425	Capana08g000767,	15.7845	42.1916	-1.41844	0.01085	0.859257	Down	vvi:100261242	47	131	5e-29	hypothetical protein LOC100261242
XLOC_026581	8[+]121550258-121553577	Capana08g000899,	221.432	463.396	-1.06538	0.0371	0.996326	Down	rcu:RCOM_1614760	66	211	4e-53	Remorin, putative		|%IPR005516:Remorin, C-terminal :%IPR005518:Remorin, N-terminal|
XLOC_026589	8[+]121867656-121951552	Capana08g000921,Capana08g000922,	5.95876	2.20895	1.43165	0.03065	0.996326	Up	pop:POPTR_765590	70	783	0	hypothetical protein; K03348 anaphase-promoting complex subunit 1	|Cellular Processes; Cell Growth and Death; Cell cycle - yeast [PATH:ko04111-Map:ko04111];|Cellular Processes; Cell Growth and Death; Cell cycle [PATH:ko04110-Map:ko04110];|Cellular Processes; Cell Growth and Death; Meiosis - yeast [PATH:ko04113-Map:ko04113];|Cellular Processes; Cell Growth and Death; Oocyte meiosis [PATH:ko04114-Map:ko04114];|Genetic Information Processing; Folding, Sorting and …	|%IPR024990:Anaphase-promoting complex subunit 1 :|		|GO:0005680:anaphase-promoting complex|	|GO:0006355:regulation of transcription, DNA-dependent|
XLOC_026601	8[+]122601818-122615610	Capana08g000943,	5.81789	2.48735	1.22589	0.02085	0.996326	Up	vvi:100249945	68	3017	0	hypothetical protein LOC100249945		|%IPR000330:SNF2-related :%IPR001487:Bromodomain|	|GO:0003676:nucleic acid binding|GO:0003677:DNA binding|GO:0004386:helicase activity|GO:0005515:protein binding|GO:0005524:ATP binding|GO:0016818:hydrolase activity, acting on acid anhydrides, in phosphorus-containing anhydrides|	|GO:0005634:nucleus|
XLOC_026633	8[+]124233386-124257216	Capana08g001052,	1.39129	0.445087	1.64427	0.00575	0.679435	Up	vvi:100255258	51	2460	0	hypothetical protein LOC100255258		|%IPR001680:WD40 repeat :%IPR015943:WD40/YVTN repeat-like-containing domain|	|GO:0005515:protein binding|		|GO:0006479:protein methylation|
XLOC_026660	8[+]125594804-125600307	Capana08g001132,	6.93209	1.82775	1.92322	0.0027	0.604495	Up	vvi:100253139	58	719	0	hypothetical protein LOC100253139; K11436 protein arginine N-methyltransferase 3 [EC:2.1.1.-]	|Genetic Information Processing; Replication and Repair; Chromosome [BR:ko03036];|	|%IPR025799:Protein arginine N-methyltransferase :|	|GO:0008168:methyltransferase activity|
XLOC_026667	8[+]125799688-125801234	Capana08g001156,	0.916633	2.82885	-1.6258	0.02145	0.996326	Down	pop:POPTR_758186	60	432	1e-119	hypothetical protein		|%IPR000863:Sulfotransferase domain :%IPR027417:P-loop containing nucleoside triphosphate hydrolase|	|GO:0008146:sulfotransferase activity|
XLOC_026699	8[+]127291801-127294562	Capana08g001266,	72.2954	194.66	-1.42898	0.0027	0.604495	Down	pop:POPTR_814829	66	112	6e-48	hypothetical protein		|%IPR001464:Annexin :%IPR009118:Annexin, plant|	|GO:0005509:calcium ion binding|GO:0005544:calcium-dependent phospholipid binding|
XLOC_026700	8[+]127307505-127309212	Capana08g001267,	5.35415	12.1307	-1.17993	0.0379	0.996326	Down	vvi:100253408	57	368	1e-100	hypothetical protein LOC100253408		|%IPR001464:Annexin :%IPR009118:Annexin, plant|	|GO:0005509:calcium ion binding|GO:0005544:calcium-dependent phospholipid binding|
XLOC_026701	8[+]127327764-127329685	Capana08g001269,	93.2812	189.457	-1.02221	0.02595	0.996326	Down	vvi:100253408	43	206	1e-68	hypothetical protein LOC100253408		|%IPR001464:Annexin :%IPR009118:Annexin, plant|	|GO:0005509:calcium ion binding|GO:0005544:calcium-dependent phospholipid binding|		|GO:0042254:ribosome biogenesis|
XLOC_026710	8[+]127402686-127420814	Capana08g001284,	5.82642	1.84754	1.65701	0.0036	0.639234	Up	vvi:100253844	69	1697	0	hypothetical protein LOC100253844; K14569 ribosome biogenesis protein BMS1	|Genetic Information Processing; Translation; Ribosome Biogenesis [BR:ko03009];|Genetic Information Processing; Translation; Ribosome biogenesis in eukaryotes [PATH:ko03008-Map:ko03008];|	|%IPR000795:Elongation factor, GTP-binding domain :%IPR007034:Ribosome biogenesis protein BMS1/TSR1, C-terminal|	|GO:0003924:GTPase activity|GO:0005525:GTP binding|	|GO:0005634:nucleus|
XLOC_026743	8[+]129729737-129733932	Capana08g001381,	0.818926	0	inf	0.00555	0.671798	Up	pop:POPTR_1072815	45	155	1e-36	hypothetical protein					|GO:0006310:DNA recombination|
XLOC_026782	8[+]131773106-131789731	Capana08g001500,	1.50129	0.574876	1.38489	0.03935	0.996326	Up	vvi:100257897	61	1053	0	similar to RECQSIM (Arabidopsis RecQ helicase sim); ATP-dependent helicase		|%IPR001650:Helicase, C-terminal :%IPR004589:DNA helicase, ATP-dependent, RecQ type|	|GO:0003676:nucleic acid binding|GO:0004386:helicase activity|GO:0005515:protein binding|GO:0005524:ATP binding|GO:0008026:ATP-dependent helicase activity|		|GO:0006139:nucleobase-containing compound metabolic process|
XLOC_026818	8[+]133088498-133108524	Capana08g001591,	1.67144	3.81035	-1.18883	0.0423	0.996326	Down	rcu:RCOM_1434540	65	741	0	3-5 exonuclease, putative		|%IPR002562:3'-5' exonuclease domain :%IPR012337:Ribonuclease H-like domain|	|GO:0003676:nucleic acid binding|GO:0008408:3'-5' exonuclease activity|
XLOC_026853	8[+]134549651-134551935	Capana08g001674,	2.80518	7.37847	-1.39523	0.019	0.996326	Down	pop:POPTR_575250	56	56.6	9e-11	hypothetical protein		|%IPR008949:Terpenoid synthase :|
XLOC_026916	8[+]137129312-137130995	Capana08g001838,	71.1915	154.911	-1.12167	0.0205	0.996326	Down	vvi:100266411	58	265	3e-69	hypothetical protein LOC100266411
XLOC_026988	8[+]140766946-140768400	Capana08g002080,	20.8143	51.5673	-1.30888	0.01875	0.996326	Down	rcu:RCOM_0990960	77	229	6e-59	calmodulin, putative (EC:1.3.1.74)		|%IPR001125:Recoverin :%IPR002048:EF-hand domain|	|GO:0005509:calcium ion binding|		|GO:0008152:metabolic process|
XLOC_026998	8[+]141302348-141306792	Capana08g002113,	10.9005	40.7893	-1.90379	0.0006	0.292889	Down	rcu:RCOM_0766900	53	584	1e-164	(R)-limonene synthase, putative (EC:4.2.3.20)		|%IPR001906:Terpene synthase, N-terminal domain :%IPR005630:Terpene synthase, metal-binding domain|	|GO:0000287:magnesium ion binding|GO:0010333:terpene synthase activity|GO:0016829:lyase activity|
XLOC_027101	8[+]147555947-147584463	Capana08g002485,Capana08g002486,	0.514238	0.0769002	2.74138	0.0306	0.996326	Up	vvi:100260579	65	2396	0	hypothetical protein LOC100260579; K08873 PI-3-kinase-related kinase SMG-1	|Genetic Information Processing; Translation; mRNA surveillance pathway [PATH:ko03015-Map:ko03015];|Metabolism; Enzyme Families; Protein kinases [BR:ko01001];|	|%IPR000403:Phosphatidylinositol 3-/4-kinase, catalytic domain :%IPR003152:PIK-related kinase, FATC|	|GO:0005515:protein binding|GO:0016772:transferase activity, transferring phosphorus-containing groups|GO:0016773:phosphotransferase activity, alcohol group as acceptor|		|GO:0055114:oxidation-reduction process|
XLOC_027103	8[+]147646958-147649040	Capana08g002492,	20.955	45.8732	-1.13036	0.02245	0.996326	Down	vvi:100253713	53	534	1e-149	hypothetical protein LOC100253713		|%IPR001128:Cytochrome P450 :%IPR002403:Cytochrome P450, E-class, group IV|	|GO:0004497:monooxygenase activity|GO:0005506:iron ion binding|GO:0009055:electron carrier activity|GO:0016705:oxidoreductase activity, acting on paired donors, with incorporation or reduction of molecular oxygen|GO:0020037:heme binding|		|GO:0055114:oxidation-reduction process|
XLOC_027104	8[+]147665875-147727523	Capana08g002493,Capana08g002494,	1.20779	4.93696	-2.03126	0.0026	0.59554	Down	vvi:100258864	63	640	0	hypothetical protein LOC100258864		|%IPR001128:Cytochrome P450 :%IPR002403:Cytochrome P450, E-class, group IV|	|GO:0004497:monooxygenase activity|GO:0005506:iron ion binding|GO:0009055:electron carrier activity|GO:0016705:oxidoreductase activity, acting on paired donors, with incorporation or reduction of molecular oxygen|GO:0020037:heme binding|
XLOC_027125	8[+]148795989-148800068	Capana08g002555,	27.6722	12.9867	1.0914	0.0312	0.996326	Up	rcu:RCOM_1447500	32	308	1e-81	hypothetical protein
XLOC_027137	8[+]149126593-149136959	Capana08g002578,	4.45933	1.96008	1.18591	0.0354	0.996326	Up	vvi:100257200	54	981	0	hypothetical protein LOC100257200; K14573 nucleolar protein 4	|Genetic Information Processing; Translation; Ribosome Biogenesis [BR:ko03009];|Genetic Information Processing; Translation; Ribosome biogenesis in eukaryotes [PATH:ko03008-Map:ko03008];|	|%IPR000504:RNA recognition motif domain :%IPR012677:Nucleotide-binding, alpha-beta plait|	|GO:0000166:nucleotide binding|GO:0003676:nucleic acid binding|
XLOC_027165	8[+]150388978-150389570	-	7.18604	18.2826	-1.3472	0.02545	0.996326	Down	vvi:100258200	65	119	1e-25	hypothetical protein LOC100258200; K14488 SAUR family protein	|Environmental Information Processing; Signal Transduction; Plant hormone signal transduction [PATH:ko04075-Map:ko04075];|	|%IPR003676:Auxin-induced protein, ARG7 :|
XLOC_027176	8[+]150870500-150871990	Capana08g002694,	36.1701	77.9803	-1.10831	0.02545	0.996326	Down	pop:POPTR_713245	81	395	1e-140	hypothetical protein					|GO:0006508:proteolysis|GO:0043086:negative regulation of catalytic activity|
XLOC_027186	8[+]151270438-151273077	Capana08g002717,	10.4404	4.55557	1.19647	0.02545	0.996326	Up	vvi:100243634	78	1267	0	hypothetical protein LOC100243634		|%IPR000209:Peptidase S8/S53 domain :%IPR003137:Protease-associated domain, PA|	|GO:0004252:serine-type endopeptidase activity|GO:0042802:identical protein binding|
XLOC_027196	8[+]151704777-151706337	Capana08g002741,	17.6372	44.2377	-1.32665	0.00975	0.829502	Down	vvi:100262284	48	261	1e-67	hypothetical protein LOC100262284
XLOC_027237	8[-]66397-69703	Capana08g000011,	35.5142	17.3479	1.03364	0.035	0.996326	Up	pop:POPTR_177802	85	746	0	hypothetical protein					|GO:0006468:protein phosphorylation|
XLOC_027257	8[-]1134344-1139031	Capana08g000071,	11.6319	4.89231	1.2495	0.0124	0.891872	Up	vvi:100254716	67	1357	0	hypothetical protein LOC100254716		|%IPR000719:Protein kinase domain :%IPR001611:Leucine-rich repeat|	|GO:0004672:protein kinase activity|GO:0004674:protein serine/threonine kinase activity|GO:0004713:protein tyrosine kinase activity|GO:0005515:protein binding|GO:0005524:ATP binding|GO:0016772:transferase activity, transferring phosphorus-containing groups|		|GO:0016567:protein ubiquitination|
XLOC_027267	8[-]1841377-1843287	Capana08g000105,	8.24238	29.4194	-1.83563	0.0006	0.292889	Down	vvi:100249092	54	447	1e-123	hypothetical protein LOC100249092		|%IPR003613:U box domain :%IPR011989:Armadillo-like helical|	|GO:0004842:ubiquitin-protein ligase activity|GO:0005488:binding|	|GO:0000151:ubiquitin ligase complex|	|GO:0006536:glutamate metabolic process|GO:0019752:carboxylic acid metabolic process|
XLOC_027273	8[-]2143633-2150950	Capana08g000129,	11.2831	45.1433	-2.00035	5e-05	0.0875794	Down	vvi:100266215	83	871	0	hypothetical protein LOC100266215; K01580 glutamate decarboxylase [EC:4.1.1.15]	|Human Diseases; Metabolic Diseases; Type I diabetes mellitus [PATH:ko04940-Map:ko04940];|Metabolism; Amino Acid Metabolism; Alanine, aspartate and glutamate metabolism [PATH:ko00250-Map:ko00250];|Metabolism; Carbohydrate Metabolism; Butanoate metabolism [PATH:ko00650-Map:ko00650];|Metabolism; Metabolism of Other Amino Acids; Taurine and hypotaurine metabolism [PATH:ko00430-Map:ko00430];|Metaboli…	|%IPR002129:Pyridoxal phosphate-dependent decarboxylase :%IPR010107:Glutamate decarboxylase|	|GO:0003824:catalytic activity|GO:0004351:glutamate decarboxylase activity|GO:0016831:carboxy-lyase activity|GO:0030170:pyridoxal phosphate binding|
XLOC_027277	8[-]2339303-2355580	Capana08g000139,	6.91166	15.7166	-1.18519	0.04015	0.996326	Down	rcu:RCOM_0597600	62	249	3e-64	calcium ion binding protein, putative		|%IPR007736:Caleosin :|			|GO:0006629:lipid metabolic process|
XLOC_027296	8[-]19020674-19022225	Capana08g000231,	8.32843	19.6069	-1.23525	0.02085	0.996326	Down	vvi:100266852	63	535	1e-150	hypothetical protein LOC100266852		|%IPR002921:Lipase, class 3 :|	|GO:0004806:triglyceride lipase activity|		|GO:0006468:protein phosphorylation|
XLOC_027306	8[-]25212427-25214782	Capana08g000277,	5.41045	12.8549	-1.24849	0.0244	0.996326	Down	vvi:100262822	63	549	1e-154	hypothetical protein LOC100262822		|%IPR000719:Protein kinase domain :%IPR001245:Serine-threonine/tyrosine-protein kinase catalytic domain|	|GO:0004672:protein kinase activity|GO:0004674:protein serine/threonine kinase activity|GO:0004713:protein tyrosine kinase activity|GO:0005524:ATP binding|GO:0016772:transferase activity, transferring phosphorus-containing groups|
XLOC_027311	8[-]28607711-28609383	-	354.32	802.398	-1.17927	0.00825	0.774573	Down	vvi:100249695	48	99.8	1e-19	hypothetical protein LOC100249695		|%IPR010399:Tify :%IPR018467:CO/COL/TOC1, conserved site|
XLOC_027386	8[-]92474991-92481452	-	1.08738	3.05814	-1.4918	0.0426	0.996326	Down										|GO:0055114:oxidation-reduction process|
XLOC_027428	8[-]107138563-107142064	Capana08g000749,	5.98969	2.60135	1.20322	0.03605	0.996326	Up	rcu:RCOM_0803140	76	643	0	monooxygenase, putative (EC:1.14.13.8); K11816 YUCCA family monooxygenase [EC:1.14.13.-]	|Metabolism; Amino Acid Metabolism; Tryptophan metabolism [PATH:ko00380-Map:ko00380];|	|%IPR000103:Pyridine nucleotide-disulphide oxidoreductase, class-II :%IPR013027:FAD-dependent pyridine nucleotide-disulphide oxidoreductase|	|GO:0004499:N,N-dimethylaniline monooxygenase activity|GO:0016491:oxidoreductase activity|GO:0050660:flavin adenine dinucleotide binding|GO:0050661:NADP binding|
XLOC_027429	8[-]107789057-107797886	Capana08g000754,	3.51869	1.25162	1.49125	0.0073	0.739361	Up	vvi:100264575	47	1456	0	hypothetical protein LOC100264575
XLOC_027433	8[-]111140449-111141430	-	226.78	465.288	-1.03683	0.0304	0.996326	Down										|GO:0019752:carboxylic acid metabolic process|
XLOC_027448	8[-]119544395-119546433	Capana08g000841,	21.8281	69.0307	-1.66105	0.0031	0.632251	Down	vvi:100258141	63	288	4e-92	hypothetical protein LOC100258141; K01590 histidine decarboxylase [EC:4.1.1.22]	|Metabolism; Amino Acid Metabolism; Histidine metabolism [PATH:ko00340-Map:ko00340];|	|%IPR002129:Pyridoxal phosphate-dependent decarboxylase :%IPR015421:Pyridoxal phosphate-dependent transferase, major region, subdomain 1|	|GO:0003824:catalytic activity|GO:0016831:carboxy-lyase activity|GO:0030170:pyridoxal phosphate binding|
XLOC_027449	8[-]119584051-119584915	Capana08g000842,	256.301	553.279	-1.11017	0.0202	0.996326	Down	pop:POPTR_419638	37	155	4e-36	hypothetical protein		|%IPR000182:GNAT domain :%IPR016181:Acyl-CoA N-acyltransferase|	|GO:0008080:N-acetyltransferase activity|
XLOC_027492	8[-]122971761-122979821	Capana08g000974,	12.7919	5.46701	1.22641	0.02845	0.996326	Up	pop:POPTR_572303	67	345	7e-93	hypothetical protein		|%IPR001005:SANT/Myb domain :%IPR006447:Myb domain, plants|	|GO:0003677:DNA binding|GO:0003682:chromatin binding|
XLOC_027504	8[-]123380747-123386412	Capana08g000991,	10.4757	5.09412	1.04015	0.04215	0.996326	Up	vvi:100256846	32	520	1e-145	hypothetical protein LOC100256846		|%IPR000048:IQ motif, EF-hand binding site :%IPR003103:BAG domain|	|GO:0005515:protein binding|GO:0051087:chaperone binding|		|GO:0006355:regulation of transcription, DNA-dependent|
XLOC_027525	8[-]124129839-124132087	Capana08g001044,	88.2809	192.767	-1.12668	0.0192	0.996326	Down	pop:POPTR_834779	41	226	3e-57	hypothetical protein		|%IPR003657:DNA-binding WRKY :|	|GO:0003700:sequence-specific DNA binding transcription factor activity|GO:0043565:sequence-specific DNA binding|		|GO:0006811:ion transport|GO:0055085:transmembrane transport|
XLOC_027538	8[-]124669679-124680304	Capana08g001081,	13.4536	35.3133	-1.39222	0.00835	0.774573	Down	rcu:RCOM_1579800	65	924	0	Cyclic nucleotide-gated ion channel, putative		|%IPR000595:Cyclic nucleotide-binding domain :%IPR005821:Ion transport domain|	|GO:0005216:ion channel activity|	|GO:0016020:membrane|
XLOC_027540	8[-]124731962-124733635	Capana08g001087,	0.624017	0	inf	0.00385	0.639234	Up	vvi:100241420	54	257	4e-67	hypothetical protein LOC100241420		|%IPR001841:Zinc finger, RING-type :%IPR013083:Zinc finger, RING/FYVE/PHD-type|	|GO:0005515:protein binding|GO:0008270:zinc ion binding|
XLOC_027547	8[-]125105141-125105842	Capana08g001103,	27.903	13.0522	1.09613	0.04795	0.996326	Up	pop:POPTR_799129	67	141	5e-32	SAUR25; SAUR family protein; K14488 SAUR family protein	|Environmental Information Processing; Signal Transduction; Plant hormone signal transduction [PATH:ko04075-Map:ko04075];|	|%IPR003676:Auxin-induced protein, ARG7 :|			|GO:0015743:malate transport|
XLOC_027555	8[-]125470436-125473115	Capana08g001125,	3.46779	1.42262	1.28547	0.0348	0.996326	Up	vvi:100263878	59	493	1e-137	hypothetical protein LOC100263878		|%IPR020966:Aluminum-activated malate transporter :|
XLOC_027596	8[-]127270979-127273865	Capana08g001265,	10.5146	25.6905	-1.28885	0.01585	0.941093	Down	pop:POPTR_814830	69	449	1e-124	hypothetical protein		|%IPR001464:Annexin :%IPR009118:Annexin, plant|	|GO:0005509:calcium ion binding|GO:0005544:calcium-dependent phospholipid binding|		|GO:0000160:phosphorelay signal transduction system|
XLOC_027628	8[-]129711257-129713276	Capana08g001380,	27.242	55.7162	-1.03226	0.0455	0.996326	Down	rcu:RCOM_1429810	75	229	2e-58	Histidine-containing phosphotransfer protein, putative (EC:1.3.1.74); K14490 histidine-containing phosphotransfer peotein	|Environmental Information Processing; Signal Transduction; Plant hormone signal transduction [PATH:ko04075-Map:ko04075];|	|%IPR008207:Signal transduction histidine kinase, phosphotransfer (Hpt) domain :|	|GO:0004871:signal transducer activity|
XLOC_027675	8[-]132631779-132637972	Capana08g001557,	1.2738	0.451794	1.4954	0.03635	0.996326	Up	vvi:100249393	63	818	0	hypothetical protein LOC100249393		|%IPR006553:Leucine-rich repeat, cysteine-containing subtype :|
XLOC_027679	8[-]132721627-132723693	Capana08g001562,	6.41343	21.0581	-1.71521	0.0028	0.608581	Down	pop:POPTR_579783	60	343	2e-92	hypothetical protein		|%IPR001810:F-box domain :%IPR025886:Phloem protein 2-like|	|GO:0005515:protein binding|
XLOC_027690	8[-]133053843-133057485	Capana08g001589,	2.89744	6.83575	-1.23832	0.0302	0.996326	Down	pop:POPTR_784826	39	374	1e-101	hypothetical protein
XLOC_027723	8[-]134640466-134641719	-	323.086	717.522	-1.1511	0.0165	0.95033	Down	osa:4344028	78	98.2	3e-19	Os07g0635900		|%IPR000612:Proteolipid membrane potential modulator :|		|GO:0016021:integral to membrane|
XLOC_027730	8[-]135052525-135054167	Capana08g001706,	8.43963	17.5294	-1.05452	0.04785	0.996326	Down	pop:POPTR_662504	47	76.6	5e-12	hypothetical protein
XLOC_027760	8[-]136513681-136522837	Capana08g001789,	9.17851	3.88776	1.23932	0.01885	0.996326	Up	vvi:100255686	65	734	0	hypothetical protein LOC100255686		|%IPR002885:Pentatricopeptide repeat :%IPR011990:Tetratricopeptide-like helical|	|GO:0005515:protein binding|
XLOC_027772	8[-]137269170-137270771	Capana08g001844,	90.7494	237.523	-1.38811	0.00415	0.646987	Down	vvi:100266411	58	255	4e-66	hypothetical protein LOC100266411
XLOC_027773	8[-]137275810-137277087	Capana08g001845,	50.6104	172.811	-1.77169	0.00075	0.340309	Down	vvi:100266411	60	260	6e-68	hypothetical protein LOC100266411
XLOC_027833	8[-]139691943-139696370	Capana08g002000,	71.2411	31.7605	1.16548	0.01325	0.896005	Up	rcu:RCOM_1752370	68	877	0	hypothetical protein
XLOC_027886	8[-]141820226-141822673	Capana08g002143,	0.940975	3.9359	-2.06446	0.003	0.616076	Down	vvi:100248064	55	322	6e-86	hypothetical protein LOC100248064		|%IPR011598:Myc-type, basic helix-loop-helix (bHLH) domain :|	|GO:0046983:protein dimerization activity|		|GO:0006351:transcription, DNA-dependent|
XLOC_027900	8[-]142127714-142136940	Capana08g002168,	9.65277	4.2138	1.19582	0.02255	0.996326	Up	vvi:100268096	67	1624	0	hypothetical protein LOC100268096; K02331 DNA polymerase phi subunit [EC:2.7.7.7]	|Genetic Information Processing; Replication and Repair; DNA repair and recombination proteins [BR:ko03400];|	|%IPR007015:DNA polymerase V :|	|GO:0003677:DNA binding|GO:0003887:DNA-directed DNA polymerase activity|
XLOC_027926	8[-]143643316-143644695	Capana08g002250,	7.46187	3.24586	1.20093	0.0446	0.996326	Up	ath:AT5G06630	47	222	4e-56	proline-rich extensin-like family protein
XLOC_027938	8[-]144183057-144184339	Capana08g002282,	31.8186	15.5969	1.02861	0.04565	0.996326	Up	vvi:100264703	57	206	3e-51	hypothetical protein LOC100264703		|%IPR007087:Zinc finger, C2H2 :|	|GO:0046872:metal ion binding|
XLOC_027955	8[-]144941135-144943465	Capana08g002331,	5.73302	2.63723	1.12027	0.04905	0.996326	Up	pop:POPTR_570202	80	352	6e-95	HAG904; histone acetyltransferase; K07739 elongator complex protein 3 [EC:2.3.1.48]	|Genetic Information Processing; Replication and Repair; Chromosome [BR:ko03036];|	|%IPR006638:Elongator protein 3/MiaB/NifB :%IPR007197:Radical SAM|	|GO:0003824:catalytic activity|GO:0051536:iron-sulfur cluster binding|
XLOC_027993	8[-]146624778-146629264	Capana08g002430,	2.69303	6.58551	-1.29006	0.04885	0.996326	Down	vvi:100255503	59	191	7e-47	hypothetical protein LOC100255503
XLOC_028008	8[-]147130011-147131324	Capana08g002455,	3.01409	8.23502	-1.45005	0.0213	0.996326	Down	vvi:100241930	56	312	2e-83	hypothetical protein LOC100241930
XLOC_028044	8[-]148521608-148527010	Capana08g002543,	67.0682	166.878	-1.31509	0.0075	0.744425	Down	rcu:RCOM_1447400	79	297	7e-79	hypothetical protein
XLOC_028045	8[-]148545180-148549679	Capana08g002544,	3.57266	9.18283	-1.36194	0.02085	0.996326	Down	pop:POPTR_195465	53	334	6e-90	hypothetical protein
XLOC_028046	8[-]148551698-148555410	Capana08g002545,	8.51267	18.9705	-1.15607	0.0349	0.996326	Down	pop:POPTR_195465	54	337	1e-90	hypothetical protein					|GO:0005978:glycogen biosynthetic process|GO:0009058:biosynthetic process|
XLOC_028050	8[-]148800701-148805948	Capana08g002556,	22.9442	8.70617	1.39802	0.0073	0.739361	Up	pop:POPTR_721986	77	863	0	glucose-1-phosphate adenylyltransferase (EC:2.7.7.27); K00975 glucose-1-phosphate adenylyltransferase [EC:2.7.7.27]	|Metabolism; Carbohydrate Metabolism; Amino sugar and nucleotide sugar metabolism [PATH:ko00520-Map:ko00520];|Metabolism; Carbohydrate Metabolism; Starch and sucrose metabolism [PATH:ko00500-Map:ko00500];|	|%IPR005835:Nucleotidyl transferase :%IPR005836:ADP-glucose pyrophosphorylase, conserved site|	|GO:0008878:glucose-1-phosphate adenylyltransferase activity|GO:0016779:nucleotidyltransferase activity|
XLOC_028084	8[-]150284332-150286706	Capana08g002651,	7.15546	2.85944	1.32331	0.02045	0.996326	Up	vvi:100262311	38	419	1e-115	hypothetical protein LOC100262311
XLOC_028166	8[.]2117432-2118473	-	17.5243	47.8471	-1.44908	0.0063	0.710588	Down
XLOC_028184	8[.]28609749-28611504	-	0.454465	1.66317	-1.87169	0.02475	0.996326	Down
XLOC_028185	8[.]28746334-28747308	-	6.63564	16.9594	-1.35378	0.01965	0.996326	Down
XLOC_028231	8[.]113290786-113291639	-	0.70763	2.86255	-2.01623	0.03785	0.996326	Down
XLOC_028263	8[.]124357218-124357815	-	1.63317	5.69474	-1.80195	0.0318	0.996326	Down
XLOC_028276	8[.]125524759-125525723	-	24.0476	55.834	-1.21525	0.01765	0.982363	Down	rcu:RCOM_1451990	39	84.3	1e-14	protein with unknown function
XLOC_028313	8[.]134381331-134381576	-	13.5135	42.7575	-1.66178	0.02375	0.996326	Down
XLOC_028315	8[.]134521801-134522426	-	0.60326	4.5249	-2.90704	0.04515	0.996326	Down
XLOC_028318	8[.]134603770-134604401	-	4.22037	11.6827	-1.46893	0.02565	0.996326	Down
XLOC_028403	8[.]146967297-146968000	-	39.5547	94.5557	-1.25731	0.01465	0.924223	Down
XLOC_028404	8[.]146973911-146974490	-	42.2809	85.9255	-1.02308	0.04735	0.996326	Down
XLOC_028405	8[.]146979281-146980272	-	50.6251	117.176	-1.21075	0.01395	0.91398	Down
XLOC_028408	8[.]147220779-147221250	-	1.21534	0	inf	0.0017	0.466075	Up
XLOC_028412	8[.]147589934-147590524	-	63.3259	153.191	-1.27447	0.0124	0.891872	Down
XLOC_028422	8[.]149738182-149738907	-	0	2.41981	-inf	5e-05	0.0875794	Down
XLOC_028425	8[.]150316718-150317591	-	12.3031	29.7849	-1.27556	0.01975	0.996326	Down	vvi:100255446	54	106	2e-21	hypothetical protein LOC100255446; K14488 SAUR family protein	|Environmental Information Processing; Signal Transduction; Plant hormone signal transduction [PATH:ko04075-Map:ko04075];|	|%IPR003676:Auxin-induced protein, ARG7 :|
XLOC_028429	8[.]150897758-150898841	-	1.05486	4.02748	-1.93283	0.01295	0.892621	Down	vvi:100241895	57	120	2e-25	hypothetical protein LOC100241895		|%IPR001623:DnaJ domain :|
XLOC_028431	8[.]151699491-151700215	-	3.71523	9.20478	-1.30893	0.04345	0.996326	Down
XLOC_028455	9[+]1283415-1284089	Capana09g000058,	176.923	387.718	-1.13189	0.0199	0.996326	Down
XLOC_028474	9[+]4967262-4971702	Capana09g000110,	5.9335	14.3771	-1.27682	0.01675	0.953661	Down	rcu:RCOM_0510070	68	534	1e-149	protein phosphatase 2c, putative (EC:3.1.3.16)		|%IPR001932:Protein phosphatase 2C (PP2C)-like domain :%IPR015655:Protein phosphatase 2C|	|GO:0003824:catalytic activity|		|GO:0008152:metabolic process|
XLOC_028475	9[+]5006214-5008689	Capana09g000113,	1.20955	0.219248	2.46384	0.01545	0.93507	Up	vvi:100262460	43	362	6e-98	hypothetical protein LOC100262460; K13495 cis-zeatin O-glucosyltransferase [EC:2.4.1.215]	|Metabolism; Metabolism of Terpenoids and Polyketides; Zeatin biosynthesis [PATH:ko00908-Map:ko00908];|	|%IPR002213:UDP-glucuronosyl/UDP-glucosyltransferase :|	|GO:0016758:transferase activity, transferring hexosyl groups|		|GO:0008152:metabolic process|
XLOC_028487	9[+]5305886-5307385	-	2.35039	0.713413	1.72009	0.0243	0.996326	Up	pop:POPTR_560466	40	296	4e-78	hypothetical protein; K13495 cis-zeatin O-glucosyltransferase [EC:2.4.1.215]	|Metabolism; Metabolism of Terpenoids and Polyketides; Zeatin biosynthesis [PATH:ko00908-Map:ko00908];|	|%IPR002213:UDP-glucuronosyl/UDP-glucosyltransferase :|	|GO:0016758:transferase activity, transferring hexosyl groups|
XLOC_028508	9[+]6475286-6480970	Capana09g000194,	14.9318	6.80206	1.13434	0.0325	0.996326	Up	vvi:100245695	71	611	1e-173	hypothetical protein LOC100245695
XLOC_028511	9[+]6689361-6692626	Capana09g000204,	2.83521	6.5954	-1.218	0.04995	0.996326	Down	vvi:100243880	48	234	7e-60	hypothetical protein LOC100243880; K09422 myb proto-oncogene protein, plant	|Genetic Information Processing; Transcription; Transcription factors [BR:ko03000];|	|%IPR001005:SANT/Myb domain :%IPR009057:Homeodomain-like|	|GO:0003677:DNA binding|GO:0003682:chromatin binding|
XLOC_028558	9[+]10005021-10028578	-	240.27	606.338	-1.33546	0.0099	0.830401	Down	pop:POPTR_578448	63	80.5	4e-14	hypothetical protein
XLOC_028559	9[+]10053691-10054345	Capana09g000315,	31.2089	160.556	-2.36305	5e-05	0.0875794	Down	rcu:RCOM_0803390	41	74.7	5e-12	hypothetical protein
XLOC_028560	9[+]10055299-10056416	-	29.4221	78.076	-1.40798	0.0057	0.679435	Down										|GO:0055114:oxidation-reduction process|
XLOC_028569	9[+]11399414-11405147	Capana09g000355,	5.14479	15.2253	-1.56529	0.00535	0.671798	Down	rcu:RCOM_0220560	71	780	0	cytochrome P450, putative (EC:1.3.3.9)		|%IPR001128:Cytochrome P450 :%IPR002401:Cytochrome P450, E-class, group I|	|GO:0005506:iron ion binding|GO:0009055:electron carrier activity|GO:0016705:oxidoreductase activity, acting on paired donors, with incorporation or reduction of molecular oxygen|GO:0020037:heme binding|
XLOC_028582	9[+]14016791-14052208	Capana09g000419,	2.72575	1.02047	1.41742	0.0295	0.996326	Up	ath:AT5G51200	64	1127	0	hypothetical protein; K14310 nuclear pore complex protein Nup205	|Genetic Information Processing; Translation; RNA transport [PATH:ko03013-Map:ko03013];|	|%IPR021827:Nucleoporin Nup186/Nup192/Nup205 :|		|GO:0005643:nuclear pore|
XLOC_028586	9[+]14626584-14631678	Capana09g000427,	4.92474	2.05753	1.25914	0.0424	0.996326	Up	pop:POPTR_652454	80	839	0	4-aminobutyrate:pyruvate transaminase (EC:2.6.1.19)		|%IPR005814:Aminotransferase class-III :%IPR015421:Pyridoxal phosphate-dependent transferase, major region, subdomain 1|	|GO:0003824:catalytic activity|GO:0008483:transaminase activity|GO:0030170:pyridoxal phosphate binding|
XLOC_028625	9[+]24496610-24498972	-	20.19	50.2639	-1.31588	0.0159	0.941093	Down
XLOC_028639	9[+]28809887-28811716	Capana09g000637,Capana09g000638,	1.10423	4.06158	-1.879	0.01	0.83176	Down	vvi:100257154	36	119	4e-25	hypothetical protein LOC100257154		|%IPR004158:Protein of unknown function DUF247, plant :|
XLOC_028666	9[+]44107070-44113150	Capana09g000767,	2.69073	6.32377	-1.23279	0.04725	0.996326	Down	pop:POPTR_664200	59	147	3e-33	photosystem I		|%IPR025564:Cyanobacterial aminoacyl-tRNA synthetase, CAAD domain :|
XLOC_028726	9[+]93932278-93954303	Capana09g001068,	7.62676	3.6009	1.08271	0.0347	0.996326	Up	vvi:100261323	43	969	0	hypothetical protein LOC100261323		|%IPR000313:PWWP domain :%IPR006569:CID domain|
XLOC_028756	9[+]122062024-122074848	Capana09g001193,	3.62329	1.33101	1.44478	0.009	0.799324	Up	vvi:100251071	37	676	0	hypothetical protein LOC100251071		|%IPR000182:GNAT domain :%IPR001965:Zinc finger, PHD-type|	|GO:0003677:DNA binding|GO:0005515:protein binding|GO:0008080:N-acetyltransferase activity|GO:0008270:zinc ion binding|		|GO:0006355:regulation of transcription, DNA-dependent|
XLOC_028765	9[+]129708262-129712818	Capana09g001251,	18.0716	41.728	-1.20729	0.0152	0.930531	Down	rcu:RCOM_0849600	55	555	1e-156	transcription factor, putative; K13424 WRKY transcription factor 33	|Genetic Information Processing; Transcription; Transcription factors [BR:ko03000];|Organismal Systems; Environmental Adaptation; Plant-pathogen interaction [PATH:ko04626-Map:ko04626];|	|%IPR003657:DNA-binding WRKY :|	|GO:0003700:sequence-specific DNA binding transcription factor activity|GO:0043565:sequence-specific DNA binding|
XLOC_028785	9[+]139890433-139892410	-	12.1368	38.3794	-1.66094	0.01625	0.943229	Down										|GO:0006468:protein phosphorylation|
XLOC_028840	9[+]178176142-178180245	Capana09g001538,	0.695332	2.67391	-1.94317	0.0174	0.974876	Down	vvi:100266670	71	540	1e-151	hypothetical protein LOC100266670		|%IPR000719:Protein kinase domain :%IPR001245:Serine-threonine/tyrosine-protein kinase catalytic domain|	|GO:0004672:protein kinase activity|GO:0004674:protein serine/threonine kinase activity|GO:0004713:protein tyrosine kinase activity|GO:0005524:ATP binding|GO:0016772:transferase activity, transferring phosphorus-containing groups|		|GO:0005975:carbohydrate metabolic process|
XLOC_028866	9[+]190170149-190172859	Capana09g001643,	1.9108	4.89455	-1.357	0.029	0.996326	Down	vvi:100240924	83	674	0	hypothetical protein LOC100240924; K03841 fructose-1,6-bisphosphatase I [EC:3.1.3.11]	|Metabolism; Carbohydrate Metabolism; Fructose and mannose metabolism [PATH:ko00051-Map:ko00051];|Metabolism; Carbohydrate Metabolism; Glycolysis / Gluconeogenesis [PATH:ko00010-Map:ko00010];|Metabolism; Carbohydrate Metabolism; Pentose phosphate pathway [PATH:ko00030-Map:ko00030];|Metabolism; Energy Metabolism; Carbon fixation in photosynthetic organisms [PATH:ko00710-Map:ko00710];|Metabolism; E…	|%IPR000146:Fructose-1,6-bisphosphatase class 1/Sedoheputulose-1,7-bisphosphatase :%IPR020548:Fructose-1,6-bisphosphatase, active site|	|GO:0042132:fructose 1,6-bisphosphate 1-phosphatase activity|GO:0042578:phosphoric ester hydrolase activity|
XLOC_028890	9[+]199197117-199200838	Capana09g001737,	2.39969	5.74141	-1.25856	0.0484	0.996326	Down	rcu:RCOM_0358850	57	162	6e-38	hypothetical protein
XLOC_028898	9[+]202235972-202237250	Capana09g001762,	12.0965	26.1298	-1.1111	0.0388	0.996326	Down	vvi:100247682	60	265	3e-69	hypothetical protein LOC100247682		|%IPR004045:Glutathione S-transferase, N-terminal :%IPR004046:Glutathione S-transferase, C-terminal|	|GO:0005515:protein binding|
XLOC_028925	9[+]213200640-213201989	Capana09g001858,	12.5966	27.0858	-1.1045	0.0404	0.996326	Down	vvi:100264838	56	244	5e-63	hypothetical protein LOC100264838		|%IPR004045:Glutathione S-transferase, N-terminal :%IPR004046:Glutathione S-transferase, C-terminal|	|GO:0005515:protein binding|
XLOC_028977	9[+]228373243-228385584	Capana09g002080,Capana09g002081,	2.20295	0.878953	1.32558	0.0269	0.996326	Up	vvi:100263620	38	333	8e-89	hypothetical protein LOC100263620
XLOC_029020	9[+]234572524-234575549	-	80.408	196.438	-1.28866	0.0107	0.851909	Down										|GO:0005975:carbohydrate metabolic process|GO:0006073:cellular glucan metabolic process|
XLOC_029028	9[+]235012627-235017225	Capana09g002242,	4.37294	1.69942	1.36356	0.03315	0.996326	Up	vvi:100255547	81	525	1e-147	hypothetical protein LOC100255547; K08235 xyloglucan:xyloglucosyl transferase [EC:2.4.1.207]	|Unclassified; Metabolism; Others|	|%IPR000757:Glycoside hydrolase, family 16 :%IPR008985:Concanavalin A-like lectin/glucanases superfamily|	|GO:0004553:hydrolase activity, hydrolyzing O-glycosyl compounds|GO:0016762:xyloglucan:xyloglucosyl transferase activity|	|GO:0005618:cell wall|GO:0048046:apoplast|	|GO:0006281:DNA repair|GO:0006284:base-excision repair|
XLOC_029058	9[+]236763669-236773957	Capana09g002341,	2.54707	0.868425	1.55236	0.00745	0.744425	Up	vvi:100257983	44	1379	0	hypothetical protein LOC100257983		|%IPR003265:HhH-GPD domain :%IPR003651:Endonuclease III-like, iron-sulphur cluster loop motif|	|GO:0003824:catalytic activity|GO:0004519:endonuclease activity|GO:0051539:4 iron, 4 sulfur cluster binding|		|GO:0015074:DNA integration|
XLOC_029103	9[-]96100-100934	-	2.59624	1.18467	1.13194	0.03745	0.996326	Up	vvi:100261581	42	445	0	hypothetical protein LOC100261581		|%IPR001584:Integrase, catalytic core :%IPR012337:Ribonuclease H-like domain|	|GO:0003676:nucleic acid binding|
XLOC_029110	9[-]245830-248214	Capana09g000013,	0.85629	0	inf	0.00385	0.639234	Up
XLOC_029161	9[-]4928688-4930260	Capana09g000104,	17.7927	41.4536	-1.22021	0.0245	0.996326	Down	vvi:100267670	51	175	2e-42	hypothetical protein LOC100267670		|%IPR001841:Zinc finger, RING-type :%IPR013083:Zinc finger, RING/FYVE/PHD-type|	|GO:0005515:protein binding|GO:0008270:zinc ion binding|
XLOC_029174	9[-]5547715-5549937	Capana09g000144,	826.835	2140.12	-1.37202	0.00355	0.639234	Down	vvi:100254231	41	161	1e-37	hypothetical protein LOC100254231; K13464 jasmonate ZIM domain-containing protein	|Environmental Information Processing; Signal Transduction; Plant hormone signal transduction [PATH:ko04075-Map:ko04075];|Organismal Systems; Environmental Adaptation; Plant-pathogen interaction [PATH:ko04626-Map:ko04626];|	|%IPR010399:Tify :%IPR018467:CO/COL/TOC1, conserved site|			|GO:0006810:transport|GO:0055085:transmembrane transport|
XLOC_029226	9[-]9360476-9366139	Capana09g000275,	2.73522	6.13839	-1.16621	0.0465	0.996326	Down	rcu:RCOM_0911690	81	854	0	sugar transporter, putative (EC:1.3.1.74)		|%IPR003663:Sugar/inositol transporter :%IPR005828:General substrate transporter|	|GO:0005215:transporter activity|GO:0022857:transmembrane transporter activity|GO:0022891:substrate-specific transmembrane transporter activity|	|GO:0016020:membrane|GO:0016021:integral to membrane|	|GO:0055114:oxidation-reduction process|
XLOC_029262	9[-]15571004-15576179	Capana09g000454,	13.1142	26.979	-1.0407	0.03325	0.996326	Down	vvi:100257928	60	470	1e-130	hypothetical protein LOC100257928		|%IPR005123:Oxoglutarate/iron-dependent dioxygenase :%IPR026992:Non-haem dioxygenase N-terminal domain|	|GO:0016491:oxidoreductase activity|GO:0016706:oxidoreductase activity, acting on paired donors, with incorporation or reduction of molecular oxygen, 2-oxoglutarate as one donor, and incorporation of one atom each of oxygen into both donors|
XLOC_029263	9[-]15892236-15897104	Capana09g000463,	4.11658	10.1328	-1.29952	0.04195	0.996326	Down	pop:POPTR_754352	32	110	1e-22	hypothetical protein		|%IPR001005:SANT/Myb domain :%IPR006447:Myb domain, plants|	|GO:0003677:DNA binding|GO:0003682:chromatin binding|
XLOC_029287	9[-]22783321-22784530	-	23.593	87.7933	-1.89575	0.0006	0.292889	Down
XLOC_029288	9[-]23165259-23166338	Capana09g000572,	210.68	542.586	-1.3648	0.0049	0.671798	Down	rcu:RCOM_1548470	53	249	2e-64	DUF26 domain-containing protein 2 precursor, putative		|%IPR002902:Gnk2-homologous domain :|
XLOC_029334	9[-]48809891-48814187	-	1.36153	4.25704	-1.64462	0.0191	0.996326	Down										|GO:0030036:actin cytoskeleton organization|
XLOC_029434	9[-]116763231-116771309	Capana09g001171,	6.92057	3.12157	1.14862	0.02225	0.996326	Up	vvi:100251663	32	652	0	hypothetical protein LOC100251663		|%IPR003124:WH2 domain :%IPR028288:SCAR/WAVE family|	|GO:0003779:actin binding|	|GO:0005856:cytoskeleton|
XLOC_029468	9[-]139261229-139262042	-	7.01074	16.55	-1.23919	0.04505	0.996326	Down	ath:AT3G07570	50	117	1e-39	hypothetical protein					|GO:0006812:cation transport|GO:0006816:calcium ion transport|GO:0055085:transmembrane transport|
XLOC_029479	9[-]152323763-152329702	Capana09g001388,	8.07667	16.7688	-1.05395	0.0422	0.996326	Down	rcu:RCOM_0643910	75	659	0	Vacuolar cation/proton exchanger 1a, putative; K07300 Ca2+:H+ antiporter	|Unclassified; Cellular Processes and Signaling; Other ion-coupled transporters|	|%IPR004713:Calcium/proton exchanger :%IPR004798:Calcium/proton exchanger CAX|	|GO:0008324:cation transmembrane transporter activity|GO:0015369:calcium:hydrogen antiporter activity|	|GO:0016021:integral to membrane|
XLOC_029489	9[-]157369678-157398578	Capana09g001416,Capana09g001417,Capana09g001418,	4.58784	2.0676	1.14986	0.04565	0.996326	Up	vvi:100267035	52	1591	0	hypothetical protein LOC100267035		|%IPR001005:SANT/Myb domain :%IPR009057:Homeodomain-like|	|GO:0003677:DNA binding|GO:0003682:chromatin binding|
XLOC_029531	9[-]182613157-182615688	Capana09g001568,	17.1597	7.74449	1.14778	0.03215	0.996326	Up	rcu:RCOM_0213970	63	372	1e-101	DNA binding protein, putative		|%IPR001005:SANT/Myb domain :%IPR006447:Myb domain, plants|	|GO:0003677:DNA binding|GO:0003682:chromatin binding|		|GO:0055085:transmembrane transport|
XLOC_029617	9[-]217069421-217071423	Capana09g001929,	80.5868	39.874	1.0151	0.04075	0.996326	Up	vvi:100260675	65	484	1e-135	hypothetical protein LOC100260675		|%IPR004695:Voltage-dependent anion channel :|		|GO:0016021:integral to membrane|	|GO:0006952:defense response|
XLOC_029622	9[-]218141714-218148574	Capana09g001940,	0.848609	0.333032	1.34944	0.0461	0.996326	Up	vvi:100267556	31	353	8e-95	hypothetical protein LOC100267556		|%IPR000767:Disease resistance protein :%IPR002182:NB-ARC|	|GO:0043531:ADP binding|
XLOC_029623	9[-]218318037-218325713	Capana09g001946,	37.8403	16.7452	1.17617	0.01615	0.941093	Up	vvi:100244162	78	1489	0	hypothetical protein LOC100244162; K03254 translation initiation factor eIF-3 subunit 10	|Genetic Information Processing; Translation; RNA transport [PATH:ko03013-Map:ko03013];|Genetic Information Processing; Translation; Translation factors [BR:ko03012];|	|%IPR000717:Proteasome component (PCI) domain :%IPR027512:Eukaryotic translation initiation factor 3 subunit A|	|GO:0005515:protein binding|	|GO:0005852:eukaryotic translation initiation factor 3 complex|	|GO:0006364:rRNA processing|
XLOC_029650	9[-]225178069-225185416	Capana09g002032,	7.74878	3.58661	1.11135	0.0325	0.996326	Up	vvi:100267476	61	1080	0	hypothetical protein LOC100267476; K14567 U3 small nucleolar RNA-associated protein 14	|Genetic Information Processing; Translation; Ribosome Biogenesis [BR:ko03009];|Genetic Information Processing; Translation; Ribosome biogenesis in eukaryotes [PATH:ko03008-Map:ko03008];|	|%IPR006709:Small-subunit processome, Utp14 :|		|GO:0032040:small-subunit processome|	|GO:0006468:protein phosphorylation|
XLOC_029678	9[-]232411857-232415006	Capana09g002160,	5.38257	2.22528	1.27431	0.02455	0.996326	Up	vvi:100251706	66	1069	0	hypothetical protein LOC100251706		|%IPR000719:Protein kinase domain :%IPR001245:Serine-threonine/tyrosine-protein kinase catalytic domain|	|GO:0004672:protein kinase activity|GO:0004674:protein serine/threonine kinase activity|GO:0004713:protein tyrosine kinase activity|GO:0005515:protein binding|GO:0005524:ATP binding|GO:0016772:transferase activity, transferring phosphorus-containing groups|
XLOC_029693	9[-]234679267-234681797	Capana09g002230,	3.55658	1.41309	1.33164	0.0307	0.996326	Up	vvi:100260255	60	438	1e-120	hypothetical protein LOC100260255		|%IPR006565:Bromodomain transcription factor :%IPR019473:Transcription factor TFIID, subunit 8, C-terminal|
XLOC_029706	9[-]235785740-235792836	Capana09g002281,Capana09g002282,	0.690683	0.174129	1.98786	0.0244	0.996326	Up	vvi:100248757	39	631	0	hypothetical protein LOC100248757
XLOC_029715	9[-]236145061-236146074	Capana09g002310,	8.77254	3.85176	1.18748	0.0459	0.996326	Up	pop:POPTR_563344	35	106	3e-21	hypothetical protein
XLOC_029730	9[-]236824922-236826356	-	28.3128	60.8382	-1.10353	0.0393	0.996326	Down	vvi:100261833	39	70.9	4e-11	hypothetical protein LOC100261833
XLOC_029752	9[-]238005332-238006249	Capana09g002410,	13.0904	29.0035	-1.14772	0.03355	0.996326	Down	rcu:RCOM_0517290	49	137	1e-30	hypothetical protein					|GO:0008152:metabolic process|
XLOC_029787	9[.]923289-924908	-	24.9683	8.94146	1.48152	0.007	0.739361	Up	vvi:100262460	43	354	1e-95	hypothetical protein LOC100262460; K13495 cis-zeatin O-glucosyltransferase [EC:2.4.1.215]	|Metabolism; Metabolism of Terpenoids and Polyketides; Zeatin biosynthesis [PATH:ko00908-Map:ko00908];|	|%IPR002213:UDP-glucuronosyl/UDP-glucosyltransferase :|	|GO:0016758:transferase activity, transferring hexosyl groups|
XLOC_029813	9[.]5712846-5713319	-	0.804788	0	inf	0.0131	0.896005	Up	pop:POPTR_783595	45	125	1e-27	nbs-lrr resistance protein		|%IPR001611:Leucine-rich repeat :%IPR003591:Leucine-rich repeat, typical subtype|	|GO:0005515:protein binding|
XLOC_029834	9[.]9185362-9185947	-	0	0.837971	-inf	0.00345	0.639234	Down
XLOC_029844	9[.]10199620-10201243	-	8.16201	17.4374	-1.09519	0.0404	0.996326	Down	pop:POPTR_669282	68	74.3	3e-11	hypothetical protein
XLOC_029859	9[.]14657659-14658667	-	1.65303	4.39482	-1.41069	0.041	0.996326	Down
XLOC_029880	9[.]22787149-22788433	-	1.32465	5.31089	-2.00335	0.0039	0.639234	Down
XLOC_029892	9[.]28912301-28913170	-	78.1735	180.065	-1.20377	0.01345	0.900001	Down	pop:POPTR_783925	34	72.4	4e-11	hypothetical protein
XLOC_029993	9[.]163116235-163117841	-	2.59271	7.2799	-1.48946	0.01315	0.896005	Down
XLOC_030057	9[.]215014192-215014723	-	2.77848	7.94484	-1.51572	0.04125	0.996326	Down
XLOC_030062	9[.]218845010-218845324	-	2.13519	0	inf	0.00555	0.671798	Up
XLOC_030096	9[.]235782561-235783397	-	32.4832	78.127	-1.26613	0.0138	0.907114	Down

## Sheet: Table S2
Table S2. KEGG pathway enrichment analysis of differentially expressed genes between library A and library CK at E-values ≤ 1 × 10−10.
KEGG pathway	Differentially Expressed Genes
	Total Number	Up-regulated	Down-regulated	Total Genes	Up-regulated	Down-regulated
>1. Metabolism
Metabolism; Amino Acid Metabolism; Phenylalanine metabolism [PATH:ko00360];	9	4	5	|XLOC_000286:E1.11.1.7|XLOC_000478:E1.11.1.7|XLOC_000485:E1.11.1.7|XLOC_000626:E1.11.1.7|XLOC_000640:E1.11.1.7|XLOC_000814:E4.3.1.24|XLOC_001023:E1.11.1.7|XLOC_001031:hisC|XLOC_001539:E6.2.1.12|XLOC_000294:E1.4.3.21, AOC2, AOC3, tynA|XLOC_000612:E1.11.1.7|XLOC_004783:E1.11.1.7|XLOC_005378:E1.11.1.7|XLOC_007471:E6.2.1.12|XLOC_007648:GOT2|XLOC_008005:CYP98A, C3H|XLOC_008056:TAT|XLOC_008129:TAT|XLOC…	|XLOC_001023:E1.11.1.7|XLOC_008005:CYP98A, C3H|XLOC_012788:E1.11.1.7|XLOC_022776:E1.4.3.21, AOC2, AOC3, tynA|	|XLOC_000286:E1.11.1.7|XLOC_017454:E1.11.1.7|XLOC_017455:E1.11.1.7|XLOC_017456:E1.11.1.7|XLOC_016060:E1.11.1.7|
Metabolism; Biosynthesis of Other Secondary Metabolites; Phenylpropanoid biosynthesis [PATH:ko00940];	8	3	5	|XLOC_000286:E1.11.1.7|XLOC_000478:E1.11.1.7|XLOC_000485:E1.11.1.7|XLOC_000626:E1.11.1.7|XLOC_000640:E1.11.1.7|XLOC_000700:E3.2.1.21|XLOC_000814:E4.3.1.24|XLOC_001023:E1.11.1.7|XLOC_001539:E6.2.1.12|XLOC_000612:E1.11.1.7|XLOC_004783:E1.11.1.7|XLOC_005378:E1.11.1.7|XLOC_006129:E3.2.1.21|XLOC_007471:E6.2.1.12|XLOC_008005:CYP98A, C3H|XLOC_008463:E1.11.1.7|XLOC_008512:CYP98A, C3H|XLOC_009756:E6.2.1.1…	|XLOC_001023:E1.11.1.7|XLOC_008005:CYP98A, C3H|XLOC_012788:E1.11.1.7	|XLOC_000286:E1.11.1.7|XLOC_017454:E1.11.1.7|XLOC_017455:E1.11.1.7|XLOC_017456:E1.11.1.7|XLOC_016060:E1.11.1.7|
Metabolism; Energy Metabolism; Methane metabolism [PATH:ko00680];	8	2	6	|XLOC_000286:E1.11.1.7|XLOC_000478:E1.11.1.7|XLOC_000485:E1.11.1.7|XLOC_000626:E1.11.1.7|XLOC_000640:E1.11.1.7|XLOC_001023:E1.11.1.7|XLOC_001743:PGAM, gpm|XLOC_002303:ppc|XLOC_000612:E1.11.1.7|XLOC_004783:E1.11.1.7|XLOC_005378:E1.11.1.7|XLOC_007626:serA, PHGDH|XLOC_007673:FBP, fbp|XLOC_007674:FBP, fbp|XLOC_008063:ppc|XLOC_008463:E1.11.1.7|XLOC_007572:ENO, eno|XLOC_010706:AGXT|XLOC_010829:PFK, pfk…	|XLOC_001023:E1.11.1.7|XLOC_012788:E1.11.1.7	|XLOC_000286:E1.11.1.7|XLOC_017454:E1.11.1.7|XLOC_017455:E1.11.1.7|XLOC_017456:E1.11.1.7|XLOC_016060:E1.11.1.7|XLOC_028866:FBP, fbp|
Metabolism; Glycan Biosynthesis and Metabolism; Glycosyltransferases [BR:ko01003];	8	6	2	|XLOC_000044:CSLA|XLOC_000142:GAUT|XLOC_000514:E2.4.1.15, otsA|XLOC_000708:SGT1|XLOC_000709:SGT1|XLOC_001013:GAUT|XLOC_001060:SQD2|XLOC_001300:GAUT|XLOC_002078:PIGB|XLOC_003225:GAUT|XLOC_003231:GAUT|XLOC_001488:E2.4.1.15, otsA|XLOC_002413:E2.4.1.214|XLOC_004622:E2.4.1.15, otsA:E3.1.3.12, otsB|XLOC_004750:PIGV|XLOC_004754:CALS|XLOC_004755:CALS|XLOC_005018:CESA|XLOC_005170:CALS|XLOC_005555:WAXY|XLO…	|XLOC_004622:E2.4.1.15, otsA:E3.1.3.12, otsB|XLOC_004754:CALS|XLOC_004755:CALS|XLOC_025181:CALS|XLOC_025202:CALS|XLOC_025864:E2.4.1.15, otsA|	|XLOC_000708:SGT1|XLOC_007688:A4GALT|
Metabolism; Metabolism of Terpenoids and Polyketides; Zeatin biosynthesis [PATH:ko00908];	6	6	0	|XLOC_000421:CISZOG|XLOC_000893:E1.5.99.12|XLOC_001025:CISZOG|XLOC_001418:E1.5.99.12|XLOC_002931:CISZOG|XLOC_002976:CISZOG|XLOC_003083:CISZOG|XLOC_003260:CISZOG|XLOC_001026:CISZOG|XLOC_003545:CISZOG|XLOC_003665:CISZOG|XLOC_005133:IPT|XLOC_005609:E1.5.99.12|XLOC_005908:E1.5.99.12|XLOC_007961:CISZOG|XLOC_008595:CISZOG|XLOC_008596:CISZOG|XLOC_009035:CISZOG|XLOC_009036:CISZOG|XLOC_007931:CISZOG|XLOC_…	|XLOC_009036:CISZOG|XLOC_013440:CYP735A|XLOC_019808:CISZOG|XLOC_028475:CISZOG|XLOC_028487:CISZOG|XLOC_029787:CISZOG|
Metabolism; Enzyme Families; Peptidases [BR:ko01002];	5	1	4	|XLOC_000164:USP7, UBP15|XLOC_000301:E3.4.11.21, DNPEP|XLOC_001001:OTU1, YOD1|XLOC_001071:PSMA4|XLOC_001244:USP7, UBP15|XLOC_001298:USP7, UBP15|XLOC_001421:PSMB6|XLOC_001450:PSMB6|XLOC_001690:pepP|XLOC_001705:USP22_27_51, UBP8|XLOC_001744:E2.6.1.16, glmS|XLOC_001759:AFG3|XLOC_001853:USP36_42|XLOC_001904:ftsH, hflB|XLOC_002359:USP7, UBP15|XLOC_002784:CPVL|XLOC_002916:PSMB6|XLOC_000561:E3.4.23.40|X…	|XLOC_024738:USP36_42|	|XLOC_009464:ILR1|XLOC_009780:SCPEP1|XLOC_012730:CTSA|XLOC_023137:USP7, UBP15|
Metabolism; Nucleotide Metabolism; Pyrimidine metabolism [PATH:ko00240];	5	5	0	|XLOC_000071:POLA2|XLOC_000245:RPB9, POLR2I|XLOC_000611:RPB3, POLR2C|XLOC_000857:RPC1, POLR3A|XLOC_000863:RPC25, POLR3H|XLOC_000950:E2.7.1.21, tdk|XLOC_001235:RPC82, POLR3C|XLOC_001666:RRM1|XLOC_001992:E2.7.4.6, ndk|XLOC_002000:PRI1|XLOC_002040:E3.5.1.6|XLOC_002190:DPO1, polA|XLOC_000308:POLA2|XLOC_000314:RPB9, POLR2I|XLOC_004682:POLD2|XLOC_004998:RPA2, POLR1B|XLOC_005270:E2.7.4.6, ndk|XLOC_00555…	|XLOC_000857:RPC1, POLR3A|XLOC_004998:RPA2, POLR1B|XLOC_008588:RPA1, POLR1A|XLOC_009793:POLE1|XLOC_023432:carB, CPA2|
Metabolism; Lipid Metabolism; Lipid biosynthesis proteins [BR:ko01004];	4	0	4	|XLOC_000473:ACSL, fadD|XLOC_001997:GPAT3_4, AGPAT9, AGPAT6|XLOC_002104:fabF|XLOC_000792:ACSL, fadD|XLOC_004397:LPT1, ALE1|XLOC_004502:PPT|XLOC_004638:ATS1|XLOC_004734:FAD2|XLOC_005333:fabD|XLOC_005415:fabH|XLOC_005602:fabF|XLOC_005963:LPCAT1_2|XLOC_006476:AASDH|XLOC_006532:PPT|XLOC_006021:fabI|XLOC_006317:ACSL, fadD|XLOC_006802:ACSL, fadD|XLOC_008167:DEGS|XLOC_008633:AGPAT3_4|XLOC_008646:fabI|XL…		|XLOC_006532:PPT|XLOC_010683:FAD2|XLOC_011465:FAD2|XLOC_025179:GPAT|
Metabolism; Nucleotide Metabolism; Purine metabolism [PATH:ko00230];	4	4	0	|XLOC_000071:POLA2|XLOC_000118:purC|XLOC_000245:RPB9, POLR2I|XLOC_000611:RPB3, POLR2C|XLOC_000857:RPC1, POLR3A|XLOC_000863:RPC25, POLR3H|XLOC_000870:E2.7.4.8, gmk|XLOC_000960:E2.4.2.8, hpt|XLOC_001235:RPC82, POLR3C|XLOC_001362:XDH|XLOC_001568:XDH|XLOC_001666:RRM1|XLOC_001885:E1.7.3.3|XLOC_001992:E2.7.4.6, ndk|XLOC_002000:PRI1|XLOC_002190:DPO1, polA|XLOC_003229:XDH|XLOC_000308:POLA2|XLOC_000314:RP…	|XLOC_000857:RPC1, POLR3A|XLOC_004998:RPA2, POLR1B|XLOC_008588:RPA1, POLR1A|XLOC_009793:POLE1|
Metabolism; Amino Acid Metabolism; Cysteine and methionine metabolism [PATH:ko00270];	3	0	3	|XLOC_000255:E3.3.1.1, ahcY|XLOC_000902:E2.5.1.16, SRM, speE|XLOC_001147:E2.1.1.14, metE|XLOC_001303:mtnD, mtnZ, ADI1|XLOC_001425:E1.14.17.4|XLOC_001564:cysK|XLOC_001572:mtnD, mtnZ, ADI1|XLOC_001607:E4.1.1.50, speD|XLOC_001668:E1.14.17.4|XLOC_002041:E2.5.1.16, SRM, speE|XLOC_002360:E2.1.1.14, metE|XLOC_003344:mtnD, mtnZ, ADI1|XLOC_004351:ACS|XLOC_004469:LDH, ldh|XLOC_004833:E2.1.1.14, metE|XLOC_0…		|XLOC_001425:E1.14.17.4|XLOC_001572:mtnD, mtnZ, ADI1|XLOC_005572:E4.4.1.11|
Metabolism; Amino Acid Metabolism; Histidine metabolism [PATH:ko00340];	3	0	3	|XLOC_001031:hisC|XLOC_005403:E4.1.1.22, HDC|XLOC_006665:E4.1.1.22, HDC|XLOC_009435:E1.2.1.3|XLOC_010751:hisIE|XLOC_013374:E1.2.1.3|XLOC_013715:E1.2.1.3|XLOC_014250:hisD|XLOC_015469:ALDH7A1|XLOC_017173:E1.2.1.3|XLOC_016540:E4.2.1.19, hisB|XLOC_019172:E4.1.1.22, HDC|XLOC_022018:E5.3.1.16, hisA|XLOC_023002:E1.2.1.3|XLOC_023153:E1.2.1.3|XLOC_025941:HIS7|XLOC_027448:E4.1.1.22, HDC|XLOC_027778:E2.4.2.…		|XLOC_005403:E4.1.1.22, HDC|XLOC_006665:E4.1.1.22, HDC|XLOC_027448:E4.1.1.22, HDC|
Metabolism; Carbohydrate Metabolism; Amino sugar and nucleotide sugar metabolism [PATH:ko00520];	3	1	2	|XLOC_000142:GAUT|XLOC_001013:GAUT|XLOC_001300:GAUT|XLOC_001744:E2.6.1.16, glmS|XLOC_001991:galE, GALE|XLOC_002068:E1.1.1.271, fcl|XLOC_002073:E5.1.3.6|XLOC_002146:E5.1.3.6|XLOC_002239:AXS|XLOC_002300:glgC|XLOC_002348:E1.6.2.2|XLOC_002420:USP|XLOC_003225:GAUT|XLOC_003231:GAUT|XLOC_000891:UGP2, galU, galF|XLOC_000899:glgC|XLOC_001136:UGDH, ugd|XLOC_004714:E5.1.3.6|XLOC_004925:galK|XLOC_005110:glgC…	|XLOC_028050:glgC|	|XLOC_001991:galE, GALE|XLOC_010940:GMPP|
Metabolism; Carbohydrate Metabolism; Starch and sucrose metabolism [PATH:ko00500];	3	3	0	|XLOC_000142:GAUT|XLOC_000514:E2.4.1.15, otsA|XLOC_000700:E3.2.1.21|XLOC_000756:E3.1.1.11|XLOC_000986:E3.1.1.11|XLOC_001013:GAUT|XLOC_001300:GAUT|XLOC_001452:E2.4.1.18, glgB|XLOC_002073:E5.1.3.6|XLOC_002146:E5.1.3.6|XLOC_002300:glgC|XLOC_003225:GAUT|XLOC_003231:GAUT|XLOC_000891:UGP2, galU, galF|XLOC_000899:glgC|XLOC_001136:UGDH, ugd|XLOC_001488:E2.4.1.15, otsA|XLOC_004622:E2.4.1.15, otsA:E3.1.3.1…	|XLOC_004622:E2.4.1.15, otsA:E3.1.3.12, otsB|XLOC_025864:E2.4.1.15, otsA|XLOC_028050:glgC|
Metabolism; Energy Metabolism; Photosynthesis - antenna proteins [PATH:ko00196];	3	3	0	|XLOC_001844:LHCB1|XLOC_001845:LHCB1|XLOC_001840:LHCB1|XLOC_006213:LHCB5|XLOC_006379:LHCB5|XLOC_007378:LHCA3|XLOC_016400:LHCB3|XLOC_017098:LHCA4|XLOC_019550:LHCB7|XLOC_021317:LHCA1|XLOC_024998:LHCB2|XLOC_025924:LHCB3|XLOC_026426:LHCA2|XLOC_026968:LHCB6|XLOC_026969:LHCB6|XLOC_027409:LHCB1|XLOC_028777:LHCB5|XLOC_028835:LHCB4|	|XLOC_001840:LHCB1|XLOC_016400:LHCB3|XLOC_017098:LHCA4|
Metabolism; Energy Metabolism; Photosynthesis proteins [BR:ko00194];	3	3	0	|XLOC_000300:psbP|XLOC_001512:psbA|XLOC_001844:LHCB1|XLOC_001845:LHCB1|XLOC_001840:LHCB1|XLOC_006108:psbA|XLOC_006213:LHCB5|XLOC_006225:psbP|XLOC_006379:LHCB5|XLOC_006655:psaK|XLOC_006809:psaN|XLOC_007378:LHCA3|XLOC_008285:petF|XLOC_008477:psbP|XLOC_008680:psbY|XLOC_009816:petF|XLOC_011014:ATPF1D, atpH|XLOC_011997:petF|XLOC_012825:psbO|XLOC_012980:petH|XLOC_013208:ATPF1G, atpG|XLOC_013592:psbO|XL…	|XLOC_001840:LHCB1|XLOC_016400:LHCB3|XLOC_017098:LHCA4|
Metabolism; Enzyme Families; Cytochrome P450 [BR:ko00199];	3	1	2	|XLOC_005242:KAO|XLOC_005835:KAO|XLOC_005875:E1.14.13.93|XLOC_006720:E1.14.13.93|XLOC_008005:CYP98A, C3H|XLOC_008512:CYP98A, C3H|XLOC_009074:AOS|XLOC_013012:CYP710A|XLOC_013389:CYP90B1, DWF4|XLOC_013425:CYP90C1, ROT3|XLOC_014564:CYP84A, F5H|XLOC_017137:E1.14.13.21|XLOC_018896:AOS|XLOC_018899:E1.14.13.78|XLOC_022536:CYP73A|XLOC_022537:CYP73A|XLOC_023133:CYP90A1, CPD|XLOC_023171:KAO|XLOC_023867:KAO…	|XLOC_008005:CYP98A, C3H|	|XLOC_017137:E1.14.13.21|XLOC_018896:AOS|
Metabolism; Enzyme Families; Protein kinases [BR:ko01001];	3	2	1	|XLOC_000033:CDC2L|XLOC_000200:BIN2|XLOC_000482:AAK|XLOC_000541::CPK|XLOC_001002:CPK|XLOC_001322:CPK|XLOC_001347:ADCK, ABC1|XLOC_001356:ADCK, ABC1|XLOC_001664:ADCK, ABC1|XLOC_001847:FLS2|XLOC_002363:CPK|XLOC_002596:CDC2L|XLOC_000176:ADCK, ABC1|XLOC_000540:SNRK2|XLOC_002055:CDC2L|XLOC_003070:ADCK, ABC1|XLOC_004354:ERK1_2|XLOC_004364:RIOK1|XLOC_004513:CDC7|XLOC_005323:CPK|XLOC_005373:MPK6|XLOC_0054…	|XLOC_022913:CPK|XLOC_027101:SMG1|	|XLOC_020140:CPK|
Metabolism; Amino Acid Metabolism; Alanine, aspartate and glutamate metabolism [PATH:ko00250];	2	1	1	|XLOC_000112:NIT2|XLOC_000156:NIT2|XLOC_000892:E4.1.1.15, gadB|XLOC_001085:E1.4.1.3|XLOC_001744:E2.6.1.16, glmS|XLOC_002117:GLT1|XLOC_002392:NIT2|XLOC_002433:AGXT2|XLOC_005051:E1.4.1.4, gdhA|XLOC_005141:E6.3.1.2, glnA|XLOC_005631:pyrB, PYR2|XLOC_007223:E2.4.2.14, purF|XLOC_007648:GOT2|XLOC_007655:AGXT2|XLOC_007924:E6.3.4.4, purA|XLOC_007991:E1.4.1.3|XLOC_009434:E6.3.4.4, purA|XLOC_010052:GPT, ALT…	|XLOC_023432:carB, CPA2|	|XLOC_027273:E4.1.1.15, gadB|
Metabolism; Amino Acid Metabolism; Amino acid related enzymes [BR:ko01007];	2	1	1	|XLOC_001031:hisC|XLOC_001822:E2.6.1.83|XLOC_002433:AGXT2|XLOC_000602:VARS, valS|XLOC_000976:E2.6.1.83|XLOC_004351:ACS|XLOC_005158:IARS, ileS|XLOC_005627:ACS|XLOC_005682:E2.6.1.11, argD|XLOC_005716:ACS10_12|XLOC_005930:TARS, thrS|XLOC_005934:WARS, trpS|XLOC_007648:GOT2|XLOC_007655:AGXT2|XLOC_007904:NARS, asnS|XLOC_008056:TAT|XLOC_008129:TAT|XLOC_007343:TAT|XLOC_009063:E2.6.1.42, ilvE|XLOC_009444:…	|XLOC_012821:LARS, leuS|	|XLOC_009481:E2.3.1.50|
Metabolism; Amino Acid Metabolism; Glycine, serine and threonine metabolism [PATH:ko00260];	2	1	1	|XLOC_002186:E4.2.1.20B, trpB|XLOC_002433:AGXT2|XLOC_003514:GLDC, gcvP|XLOC_000294:E1.4.3.21, AOC2, AOC3, tynA|XLOC_004962:thrA|XLOC_006797:SRR|XLOC_007498:E4.2.1.20B, trpB|XLOC_007626:serA, PHGDH|XLOC_007655:AGXT2|XLOC_007849:E4.3.1.19, ilvA, tdcB|XLOC_008021:E4.2.1.20B, trpB|XLOC_008487:E4.3.1.19, ilvA, tdcB|XLOC_009393:E1.4.3.21, AOC2, AOC3, tynA|XLOC_010142:thrA|XLOC_010706:AGXT|XLOC_010818:G…	|XLOC_022776:E1.4.3.21, AOC2, AOC3, tynA|	|XLOC_007498:E4.2.1.20B, trpB|
Metabolism; Biosynthesis of Other Secondary Metabolites; Flavonoid biosynthesis [PATH:ko00941];	2	1	1	|XLOC_004410:E1.14.11.19|XLOC_008005:CYP98A, C3H|XLOC_008512:CYP98A, C3H|XLOC_011576:E2.3.1.74, bcsA|XLOC_011680:E1.1.1.219|XLOC_011681:E1.1.1.219|XLOC_014551:E1.14.11.9|XLOC_014725:E2.1.1.104|XLOC_014726:E2.1.1.104|XLOC_014727:E2.1.1.104|XLOC_015649:E2.3.1.133, HCT|XLOC_017137:E1.14.13.21|XLOC_021910:E2.3.1.74, bcsA|XLOC_022536:CYP73A|XLOC_022537:CYP73A|XLOC_026669:CYP98A, C3H|XLOC_027073:E2.1.1…	|XLOC_008005:CYP98A, C3H|	|XLOC_017137:E1.14.13.21|
Metabolism; Carbohydrate Metabolism; Fructose and mannose metabolism [PATH:ko00051];	2	0	2	|XLOC_002068:E1.1.1.271, fcl|XLOC_002206:TPI, tpiA|XLOC_005430:ALDO, fbaB|XLOC_006046:E1.1.1.14, gutB|XLOC_007673:FBP, fbp|XLOC_007674:FBP, fbp|XLOC_007848:ALDO, fbaB|XLOC_009966:HK|XLOC_010307:ALDO, fbaB|XLOC_010829:PFK, pfk|XLOC_010840:E2.7.1.90, pfk|XLOC_010940:GMPP|XLOC_010976:FBP, fbp|XLOC_011341:PFK, pfk|XLOC_012780:E5.3.1.8, manA|XLOC_013924:ALDO, fbaB|XLOC_014442:E2.7.1.90, pfk|XLOC_01461…		|XLOC_010940:GMPP|XLOC_028866:FBP, fbp|
Metabolism; Carbohydrate Metabolism; Inositol phosphate metabolism [PATH:ko00562];	2	2	0	|XLOC_000261:PI4K|XLOC_000262:PI4K|XLOC_000292:PIKFYVE, FAB1|XLOC_001307:PI4K|XLOC_001387:E2.7.8.11|XLOC_001445:PIKFYVE, FAB1|XLOC_001855:E2.7.1.68, PIP5K|XLOC_002206:TPI, tpiA|XLOC_002878:PI4K|XLOC_003073:PI4K|XLOC_001348:PI4K|XLOC_004624:ITPK1|XLOC_004805:plcC|XLOC_005492:ITPK1|XLOC_008356:PLCD|XLOC_008374:E2.7.1.68, PIP5K|XLOC_008114:E2.7.1.68, PIP5K|XLOC_010794:PI4K|XLOC_011180:PI4K|XLOC_0112…	|XLOC_000261:PI4K|XLOC_024933:PIKFYVE, FAB1|
Metabolism; Energy Metabolism; Nitrogen metabolism [PATH:ko00910];	2	0	2	|XLOC_000814:E4.3.1.24|XLOC_001085:E1.4.1.3|XLOC_001645:cah|XLOC_001813:E1.7.7.1, nirA|XLOC_002117:GLT1|XLOC_001210:gltS|XLOC_005051:E1.4.1.4, gdhA|XLOC_005141:E6.3.1.2, glnA|XLOC_007944:metC|XLOC_007991:E1.4.1.3|XLOC_009084:cah|XLOC_010070:cynT, can|XLOC_011879:E6.3.5.4, asnB|XLOC_014061:cynT, can|XLOC_014426:E2.1.2.10, gcvT|XLOC_014695:E3.5.1.49|XLOC_014908:cynT, can|XLOC_012934:E1.7.7.1, nirA|…		|XLOC_001645:cah|XLOC_009084:cah|
Metabolism; Lipid Metabolism; Biosynthesis of unsaturated fatty acids [PATH:ko01040];	2	0	2	|XLOC_004478:E1.3.3.6, ACOX1, ACOX3|XLOC_004734:FAD2|XLOC_007435:E1.3.3.6, ACOX1, ACOX3|XLOC_007756:E1.3.3.6, ACOX1, ACOX3|XLOC_008353:E1.3.3.6, ACOX1, ACOX3|XLOC_010677:FAD2|XLOC_010678:FAD2|XLOC_010682:FAD2|XLOC_010683:FAD2|XLOC_011320:DESA1|XLOC_011465:FAD2|XLOC_011467:FAD2|XLOC_011863:E1.3.3.6, ACOX1, ACOX3|XLOC_012081:DESA1|XLOC_012214:FAD2|XLOC_010679:FAD2|XLOC_010684:FAD2|XLOC_011367:PHS1|…		|XLOC_010683:FAD2|XLOC_011465:FAD2|
Metabolism; Metabolism of Other Amino Acids; beta-Alanine metabolism [PATH:ko00410];	2	1	1	|XLOC_000892:E4.1.1.15, gadB|XLOC_000902:E2.5.1.16, SRM, speE|XLOC_002040:E3.5.1.6|XLOC_002041:E2.5.1.16, SRM, speE|XLOC_000294:E1.4.3.21, AOC2, AOC3, tynA|XLOC_004942:E4.2.1.17, paaG|XLOC_005272:HIBCH|XLOC_005273:HIBCH|XLOC_005367:E2.5.1.16, SRM, speE|XLOC_006482:HIBCH|XLOC_006490:HIBCH|XLOC_008402:HIBCH|XLOC_009393:E1.4.3.21, AOC2, AOC3, tynA|XLOC_009435:E1.2.1.3|XLOC_009437:E2.5.1.16, SRM, spe…	|XLOC_022776:E1.4.3.21, AOC2, AOC3, tynA|	|XLOC_027273:E4.1.1.15, gadB|
Metabolism; Metabolism of Terpenoids and Polyketides; Diterpenoid biosynthesis [PATH:ko00904];	2	2	0	|XLOC_000722:E1.14.11.13|XLOC_005242:KAO|XLOC_005835:KAO|XLOC_009884:E1.14.11.12|XLOC_012997:E1.14.11.13|XLOC_017613:E1.14.11.12|XLOC_018899:E1.14.13.78|XLOC_023171:KAO|XLOC_023777:E1.14.11.15|XLOC_023867:KAO|XLOC_025374:E4.2.3.19|	|XLOC_012997:E1.14.11.13|XLOC_023777:E1.14.11.15|
Metabolism; Metabolism of Terpenoids and Polyketides; Terpenoid backbone biosynthesis [PATH:ko00900];	2	2	0	|XLOC_001057:DHDDS, RER2, SRT1|XLOC_001771:GGPS|XLOC_001772:GGPS|XLOC_001773:GGPS|XLOC_001953:dxs|XLOC_002098:chlP, bchP|XLOC_002135:dxs|XLOC_002136:dxs|XLOC_002199:GGPS|XLOC_002923:E2.3.3.10, pksG|XLOC_004350:ispF|XLOC_004407:E2.3.3.10, pksG|XLOC_004563:E2.7.4.2, mvaK2|XLOC_004826:ispE|XLOC_004859:GGPS|XLOC_005787:DHDDS, RER2, SRT1|XLOC_006103:E1.1.1.34|XLOC_006786:E2.3.3.10, pksG|XLOC_006102:E1…	|XLOC_002199:GGPS|XLOC_017096:chlP, bchP|
Metabolism; Amino Acid Metabolism; Phenylalanine, tyrosine and tryptophan biosynthesis [PATH:ko00400];	1	0	1	|XLOC_001031:hisC|XLOC_002186:E4.2.1.20B, trpB|XLOC_004713:aroA|XLOC_005167:aroDE, DHQ-SDH|XLOC_007498:E4.2.1.20B, trpB|XLOC_007609:aroDE, DHQ-SDH|XLOC_007648:GOT2|XLOC_008021:E4.2.1.20B, trpB|XLOC_008056:TAT|XLOC_008129:TAT|XLOC_007343:TAT|XLOC_011055:E2.7.1.71, aroK, aroL|XLOC_011347:E2.5.1.54, aroF, aroG, aroH|XLOC_011607:TAT|XLOC_011611:E4.2.1.20BB, trpB|XLOC_010917:aroDE, DHQ-SDH|XLOC_011346…		|XLOC_007498:E4.2.1.20B, trpB|
Metabolism; Amino Acid Metabolism; Tryptophan metabolism [PATH:ko00380];	1	1	0	|XLOC_001408:OGDH, sucA|XLOC_004942:E4.2.1.17, paaG|XLOC_005934:WARS, trpS|XLOC_008716:YUCCA|XLOC_009435:E1.2.1.3|XLOC_010054:AAO1|XLOC_011623:WARS, trpS|XLOC_011643:katE, CAT|XLOC_012284:katE, CAT|XLOC_013374:E1.2.1.3|XLOC_013715:E1.2.1.3|XLOC_014499:katE, CAT|XLOC_012712:OGDH, sucA|XLOC_015469:ALDH7A1|XLOC_017173:E1.2.1.3|XLOC_019569:katE, CAT|XLOC_020728:E2.3.1.9, atoB|XLOC_020786:OGDH, sucA|X…	|XLOC_027428:YUCCA|
Metabolism; Amino Acid Metabolism; Tyrosine metabolism [PATH:ko00350];	1	1	0	|XLOC_001031:hisC|XLOC_000294:E1.4.3.21, AOC2, AOC3, tynA|XLOC_004307:E1.1.1.1, adh|XLOC_007648:GOT2|XLOC_008056:TAT|XLOC_008129:TAT|XLOC_007343:TAT|XLOC_009393:E1.4.3.21, AOC2, AOC3, tynA|XLOC_011163:frmA, ADH5, adhC|XLOC_011607:TAT|XLOC_012162:E3.7.1.2, FAH|XLOC_016603:E1.2.1.16, gabD|XLOC_017385:E4.1.1.25|XLOC_018735:TAT|XLOC_019184:E1.1.1.1, adh|XLOC_019574:frmA, ADH5, adhC|XLOC_019853:frmA, …	|XLOC_022776:E1.4.3.21, AOC2, AOC3, tynA|
Metabolism; Amino Acid Metabolism; Valine, leucine and isoleucine biosynthesis [PATH:ko00290];	1	1	0	|XLOC_000190:E2.3.3.13, leuA|XLOC_000582:E1.1.1.85, leuB|XLOC_001054:E2.2.1.6L, ilvB, ilvG, ilvI|XLOC_001316:E2.3.3.13, leuA|XLOC_001361:E2.3.3.13, leuA|XLOC_001363:PDHA, pdhA|XLOC_002038:ilvC|XLOC_002543:PDHA, pdhA|XLOC_003164:E2.3.3.13, leuA|XLOC_003413:PDHA, pdhA|XLOC_000602:VARS, valS|XLOC_005158:IARS, ileS|XLOC_005357:PDHB, pdhB|XLOC_007849:E4.3.1.19, ilvA, tdcB|XLOC_008487:E4.3.1.19, ilvA, …	|XLOC_012821:LARS, leuS|
Metabolism; Amino Acid Metabolism; Valine, leucine and isoleucine degradation [PATH:ko00280];	1	0	1	|XLOC_000319:E4.1.3.4, HMGCL, hmgL|XLOC_000955:E1.1.1.31, mmsB|XLOC_001609:E1.2.4.4B, bkdA2|XLOC_002923:E2.3.3.10, pksG|XLOC_004407:E2.3.3.10, pksG|XLOC_004942:E4.2.1.17, paaG|XLOC_004969:E2.3.1.168, bkdB|XLOC_005135:E4.1.3.4, HMGCL, hmgL|XLOC_005272:HIBCH|XLOC_005273:HIBCH|XLOC_005374:E1.3.99.10, ivd|XLOC_005790:AUH|XLOC_006137:E1.2.4.4B, bkdA2|XLOC_006482:HIBCH|XLOC_006490:HIBCH|XLOC_006786:E2.…		|XLOC_019212:E1.2.4.4A, bkdA1|
Metabolism; Biosynthesis of Other Secondary Metabolites; Flavone and flavonol biosynthesis [PATH:ko00944];	1	0	1	|XLOC_016055:E2.1.1.76|XLOC_017137:E1.14.13.21|XLOC_016054:E2.1.1.76|		|XLOC_017137:E1.14.13.21|
Metabolism; Biosynthesis of Other Secondary Metabolites; Isoquinoline alkaloid biosynthesis [PATH:ko00950];	1	1	0	|XLOC_000294:E1.4.3.21, AOC2, AOC3, tynA|XLOC_008056:TAT|XLOC_008129:TAT|XLOC_007343:TAT|XLOC_009393:E1.4.3.21, AOC2, AOC3, tynA|XLOC_011607:TAT|XLOC_017385:E4.1.1.25|XLOC_018735:TAT|XLOC_022776:E1.4.3.21, AOC2, AOC3, tynA|XLOC_025733:E4.1.1.25|XLOC_025755:TAT|XLOC_025756:TAT|XLOC_025757:TAT|XLOC_026476:E2.6.1.1B, aspC|XLOC_027441:E2.6.1.1B, aspC|XLOC_028721:E4.1.1.25|	|XLOC_022776:E1.4.3.21, AOC2, AOC3, tynA|
Metabolism; Biosynthesis of Other Secondary Metabolites; Stilbenoid, diarylheptanoid and gingerol biosynthesis [PATH:ko00945];	1	1	0	|XLOC_008005:CYP98A, C3H|XLOC_008512:CYP98A, C3H|XLOC_014725:E2.1.1.104|XLOC_014726:E2.1.1.104|XLOC_014727:E2.1.1.104|XLOC_015649:E2.3.1.133, HCT|XLOC_022536:CYP73A|XLOC_022537:CYP73A|XLOC_026669:CYP98A, C3H|XLOC_027073:E2.1.1.104|XLOC_028478:E2.3.1.133, HCT|	|XLOC_008005:CYP98A, C3H|
Metabolism; Biosynthesis of Other Secondary Metabolites; Tropane, piperidine and pyridine alkaloid biosynthesis [PATH:ko00960];	1	1	0	|XLOC_001031:hisC|XLOC_000294:E1.4.3.21, AOC2, AOC3, tynA|XLOC_007693:E1.1.1.206|XLOC_008056:TAT|XLOC_008129:TAT|XLOC_007343:TAT|XLOC_009393:E1.4.3.21, AOC2, AOC3, tynA|XLOC_011607:TAT|XLOC_011877:E1.1.1.206|XLOC_018735:TAT|XLOC_022489:E1.1.1.206|XLOC_022491:E1.1.1.206|XLOC_022492:E1.1.1.206|XLOC_022776:E1.4.3.21, AOC2, AOC3, tynA|XLOC_024162:E1.1.1.206|XLOC_024302:E1.1.1.206|XLOC_025755:TAT|XLOC…	|XLOC_022776:E1.4.3.21, AOC2, AOC3, tynA|
Metabolism; Carbohydrate Metabolism; Butanoate metabolism [PATH:ko00650];	1	0	1	|XLOC_000319:E4.1.3.4, HMGCL, hmgL|XLOC_000892:E4.1.1.15, gadB|XLOC_001054:E2.2.1.6L, ilvB, ilvG, ilvI|XLOC_001363:PDHA, pdhA|XLOC_002543:PDHA, pdhA|XLOC_002923:E2.3.3.10, pksG|XLOC_003413:PDHA, pdhA|XLOC_004407:E2.3.3.10, pksG|XLOC_004942:E4.2.1.17, paaG|XLOC_005135:E4.1.3.4, HMGCL, hmgL|XLOC_005357:PDHB, pdhB|XLOC_006786:E2.3.3.10, pksG|XLOC_009250:PDHB, pdhB|XLOC_010117:PDHA, pdhA|XLOC_011417:…		|XLOC_027273:E4.1.1.15, gadB|
Metabolism; Carbohydrate Metabolism; Galactose metabolism [PATH:ko00052];	1	0	1	|XLOC_001991:galE, GALE|XLOC_000891:UGP2, galU, galF|XLOC_004925:galK|XLOC_005076:E2.4.1.67|XLOC_005667:galE, GALE|XLOC_005735:E3.2.1.26, sacA|XLOC_006446:E5.4.2.2, pgm|XLOC_006618:lacZ|XLOC_007865:E3.2.1.26, sacA|XLOC_008296:galT, GALT|XLOC_008975:E3.2.1.26, sacA|XLOC_008401:E3.2.1.26, sacA|XLOC_009966:HK|XLOC_010829:PFK, pfk|XLOC_011341:PFK, pfk|XLOC_011415:UGP2, galU, galF|XLOC_011756:galE, GA…		|XLOC_001991:galE, GALE|
Metabolism; Carbohydrate Metabolism; Glycolysis / Gluconeogenesis [PATH:ko00010];	1	0	1	|XLOC_001363:PDHA, pdhA|XLOC_001497:GAPDH, gapA|XLOC_001743:PGAM, gpm|XLOC_002016:E5.1.3.15|XLOC_002206:TPI, tpiA|XLOC_002543:PDHA, pdhA|XLOC_003413:PDHA, pdhA|XLOC_004307:E1.1.1.1, adh|XLOC_004469:LDH, ldh|XLOC_004877:PK, pyk|XLOC_005357:PDHB, pdhB|XLOC_005430:ALDO, fbaB|XLOC_005523:LDH, ldh|XLOC_005834:PK, pyk|XLOC_006446:E5.4.2.2, pgm|XLOC_007673:FBP, fbp|XLOC_007674:FBP, fbp|XLOC_007848:ALDO,…		|XLOC_028866:FBP, fbp|
Metabolism; Carbohydrate Metabolism; Pentose and glucuronate interconversions [PATH:ko00040];	1	1	0	|XLOC_000756:E3.1.1.11|XLOC_000986:E3.1.1.11|XLOC_000891:UGP2, galU, galF|XLOC_001136:UGDH, ugd|XLOC_006321:E3.1.1.11|XLOC_006563:E3.1.1.11|XLOC_009435:E1.2.1.3|XLOC_009524:rpe, RPE|XLOC_011238:E3.1.1.11|XLOC_011299:E4.2.2.2, pel|XLOC_011415:UGP2, galU, galF|XLOC_011801:E3.2.1.15|XLOC_013195:E3.1.1.11|XLOC_013368:E3.1.1.11|XLOC_013374:E1.2.1.3|XLOC_013648:UGDH, ugd|XLOC_013650:UGDH, ugd|XLOC_0137…	|XLOC_017287:E4.2.2.2, pel|
Metabolism; Carbohydrate Metabolism; Pentose phosphate pathway [PATH:ko00030];	1	0	1	|XLOC_000608:E1.1.1.44, PGD, gnd|XLOC_002231:E2.2.1.2, talA, talB|XLOC_005430:ALDO, fbaB|XLOC_005736:E2.2.1.2, talA, talB|XLOC_005829:PRPS, prsA|XLOC_006446:E5.4.2.2, pgm|XLOC_007348:E2.7.1.12, gntK, idnK|XLOC_007563:PRPS, prsA|XLOC_007673:FBP, fbp|XLOC_007674:FBP, fbp|XLOC_007848:ALDO, fbaB|XLOC_009524:rpe, RPE|XLOC_009595:PGLS, pgl, devB|XLOC_010307:ALDO, fbaB|XLOC_010829:PFK, pfk|XLOC_010968:E…		|XLOC_028866:FBP, fbp|
Metabolism; Energy Metabolism; Carbon fixation in photosynthetic organisms [PATH:ko00710];	1	0	1	|XLOC_002206:TPI, tpiA|XLOC_002303:ppc|XLOC_004877:PK, pyk|XLOC_005430:ALDO, fbaB|XLOC_005834:PK, pyk|XLOC_006644:E1.1.1.39|XLOC_006517:MDH1|XLOC_007673:FBP, fbp|XLOC_007674:FBP, fbp|XLOC_007848:ALDO, fbaB|XLOC_008063:ppc|XLOC_008491:PK, pyk|XLOC_009524:rpe, RPE|XLOC_010052:GPT, ALT|XLOC_010307:ALDO, fbaB|XLOC_010976:FBP, fbp|XLOC_010982:E1.1.1.40, maeB|XLOC_012022:PK, pyk|XLOC_012023:PK, pyk|XLO…		|XLOC_028866:FBP, fbp|
Metabolism; Glycan Biosynthesis and Metabolism; Glycosphingolipid biosynthesis - globo series [PATH:ko00603];	1	0	1	|XLOC_005212:HEXA_B|XLOC_007688:A4GALT|XLOC_011330:HEXA_B|XLOC_012803:E3.2.1.22B, galA, rafA|XLOC_014332:A4GALT|XLOC_015942:E3.2.1.22B, galA, rafA|XLOC_020849:E3.2.1.22B, galA, rafA|XLOC_021947:HEXA_B|XLOC_021948:HEXA_B|XLOC_023136:E3.2.1.22B, galA, rafA|		|XLOC_007688:A4GALT|
Metabolism; Lipid Metabolism; Fatty acid elongation in mitochondria [PATH:ko00062];	1	0	1	|XLOC_004502:PPT|XLOC_006532:PPT|XLOC_009258:MECR, NRBF1|XLOC_009259:MECR, NRBF1|XLOC_009260:MECR, NRBF1|		|XLOC_006532:PPT|
Metabolism; Lipid Metabolism; Glycerolipid metabolism [PATH:ko00561];	1	0	1	|XLOC_001060:SQD2|XLOC_001997:GPAT3_4, AGPAT9, AGPAT6|XLOC_004397:LPT1, ALE1|XLOC_004638:ATS1|XLOC_006579:E2.4.1.241|XLOC_006676:E2.4.1.46|XLOC_007512:E2.4.1.241|XLOC_007938:TGL4|XLOC_008191:E2.4.1.241|XLOC_008625:TGL4|XLOC_008633:AGPAT3_4|XLOC_007805:LPT1, ALE1|XLOC_008531:E2.4.1.241|XLOC_009435:E1.2.1.3|XLOC_009950:AGPAT3_4|XLOC_012203:E2.7.1.107, DGK, dgkA|XLOC_012803:E3.2.1.22B, galA, rafA|XL…		|XLOC_025179:GPAT|
Metabolism; Lipid Metabolism; Glycerophospholipid metabolism [PATH:ko00564];	1	0	1	|XLOC_001132:E3.1.4.46, glpQ|XLOC_001387:E2.7.8.11|XLOC_001997:GPAT3_4, AGPAT9, AGPAT6|XLOC_002138:ETNK, EKI|XLOC_004397:LPT1, ALE1|XLOC_004638:ATS1|XLOC_004702:E3.1.4.4, PLD|XLOC_004805:plcC|XLOC_004949:E3.1.4.4, PLD|XLOC_005469:E2.7.7.14, PCYT2|XLOC_005963:LPCAT1_2|XLOC_007501:CRLS|XLOC_007938:TGL4|XLOC_008248:E2.7.7.14, PCYT2|XLOC_008625:TGL4|XLOC_008633:AGPAT3_4|XLOC_007805:LPT1, ALE1|XLOC_01…		|XLOC_025179:GPAT|
Metabolism; Lipid Metabolism; Sphingolipid metabolism [PATH:ko00600];	1	0	1	|XLOC_006618:lacZ|XLOC_008167:DEGS|XLOC_009701:E2.7.1.138, CERK|XLOC_009329:E4.1.2.27|XLOC_009481:E2.3.1.50|XLOC_012803:E3.2.1.22B, galA, rafA|XLOC_014362:E2.7.1.91|XLOC_015942:E3.2.1.22B, galA, rafA|XLOC_016278:ASAH2|XLOC_017360:E2.3.1.50|XLOC_019141:SUR2|XLOC_019328:E2.3.1.50|XLOC_019495:ASAH2|XLOC_019629:E1.1.1.102|XLOC_019474:E2.7.1.91|XLOC_020849:E3.2.1.22B, galA, rafA|XLOC_022751:E2.3.1.50|…		|XLOC_009481:E2.3.1.50|
Metabolism; Lipid Metabolism; Steroid biosynthesis [PATH:ko00100];	1	0	1	|XLOC_005030:E2.1.1.41, SMT1, ERG6|XLOC_005364:E2.1.1.41, SMT1, ERG6|XLOC_005702:SMO1|XLOC_005989:SMO1|XLOC_007632:DHCR7|XLOC_007938:TGL4|XLOC_008625:TGL4|XLOC_007926:E2.1.1.41, SMT1, ERG6|XLOC_010768:CPI1|XLOC_011499:DHCR7|XLOC_012737:DHCR24|XLOC_013012:CYP710A|XLOC_013448:SC5DL|XLOC_013934:SC5DL|XLOC_013966:E1.14.99.7, SQLE, ERG1|XLOC_014148:DHCR24|XLOC_017734:E2.1.1.41, SMT1, ERG6|XLOC_018993:…		|XLOC_024119:DHCR24|
Metabolism; Lipid Metabolism; alpha-Linolenic acid metabolism [PATH:ko00592];	1	0	1	|XLOC_004478:E1.3.3.6, ACOX1, ACOX3|XLOC_007435:E1.3.3.6, ACOX1, ACOX3|XLOC_007756:E1.3.3.6, ACOX1, ACOX3|XLOC_007938:TGL4|XLOC_008353:E1.3.3.6, ACOX1, ACOX3|XLOC_008625:TGL4|XLOC_009074:AOS|XLOC_010849:OPCL1|XLOC_011863:E1.3.3.6, ACOX1, ACOX3|XLOC_018896:AOS|XLOC_024932:PLA2G|		|XLOC_018896:AOS|
Metabolism; Metabolism of Cofactors and Vitamins; Porphyrin and chlorophyll metabolism [PATH:ko00860];	1	1	0	|XLOC_000639:hemB, ALAD|XLOC_002098:chlP, bchP|XLOC_002285:E1.3.1.33, por|XLOC_005064:PPOX, hemY|XLOC_006487:COX10|XLOC_006088:E1.3.7.4|XLOC_007455:chlI, bchI|XLOC_007534:hemF, CPOX|XLOC_008013:E1.14.13.81, acsF, chlE|XLOC_008064:hemE, UROD|XLOC_008146:chlI, bchI|XLOC_009771:PAO, ACD1|XLOC_011233:COX15|XLOC_017033:E2.1.1.11, chlM, bchM|XLOC_017096:chlP, bchP|XLOC_017464:hemL|XLOC_019012:hemA|XLOC…	|XLOC_017096:chlP, bchP|
Metabolism; Metabolism of Cofactors and Vitamins; Vitamin B6 metabolism [PATH:ko00750];	1	0	1	|XLOC_001940:PHOSPHO2|XLOC_001941:PHOSPHO2|XLOC_009105:pdxT, pdx2|XLOC_014646:pdxK, pdxY|XLOC_015481:E4.2.3.1, thrC|XLOC_016886:PHOSPHO2|XLOC_022860:E4.2.3.1, thrC|XLOC_023456:pdxS, pdx1|		|XLOC_016886:PHOSPHO2|
Metabolism; Metabolism of Other Amino Acids; Selenocompound metabolism [PATH:ko00450];	1	0	1	|XLOC_001147:E2.1.1.14, metE|XLOC_002360:E2.1.1.14, metE|XLOC_004833:E2.1.1.14, metE|XLOC_005572:E4.4.1.11|XLOC_007944:metC|XLOC_008584:E1.8.1.9, trxB|XLOC_013284:E1.8.1.9, trxB|XLOC_014030:E2.5.1.48, metB|XLOC_012880:E2.5.1.48, metB|XLOC_016125:MARS, metG|XLOC_018169:PAPSS|XLOC_019528:PAPSS|XLOC_020143:E2.5.1.48, metB|XLOC_020231:E1.8.1.9, trxB|XLOC_020311:PAPSS|XLOC_020312:PAPSS|XLOC_020416:E1.…		|XLOC_005572:E4.4.1.11|
Metabolism; Metabolism of Other Amino Acids; Taurine and hypotaurine metabolism [PATH:ko00430];	1	0	1	|XLOC_000892:E4.1.1.15, gadB|XLOC_007428:E1.13.11.19, ADO|XLOC_011417:E4.1.1.15, gadB|XLOC_014047:E1.13.11.19, ADO|XLOC_014865:E1.13.11.19, ADO|XLOC_015848:E1.13.11.19, ADO|XLOC_015849:E1.13.11.19, ADO|XLOC_015975:E4.1.1.15, gadB|XLOC_015787:E1.13.11.19, ADO|XLOC_021810:ggt|XLOC_025141:E1.13.11.19, ADO|XLOC_027273:E4.1.1.15, gadB|XLOC_029199:ggt|		|XLOC_027273:E4.1.1.15, gadB|
Metabolism; Metabolism of Terpenoids and Polyketides; Prenyltransferases [BR:ko01006];	1	1	0	|XLOC_001057:DHDDS, RER2, SRT1|XLOC_001634:RABGGTA|XLOC_001771:GGPS|XLOC_001772:GGPS|XLOC_001773:GGPS|XLOC_002199:GGPS|XLOC_004747:crtB|XLOC_004859:GGPS|XLOC_005133:IPT|XLOC_005787:DHDDS, RER2, SRT1|XLOC_006487:COX10|XLOC_006726:HPT, TPT|XLOC_008096:FDPS|XLOC_009694:IPT|XLOC_009804:miaA, TRIT1|XLOC_013244:crtB|XLOC_013718:FNTB|XLOC_015720:RABGGTB|XLOC_016184:DHDDS, RER2, SRT1|XLOC_016381:FDPS|XLO…	|XLOC_002199:GGPS|
>2. Genetic Information Processing
Genetic Information Processing; Transcription; Transcription factors [BR:ko03000];	19	2	17	|XLOC_000225:OVM, ANT|XLOC_000288:ABF|XLOC_000373:TGA|XLOC_000731:MYBP|XLOC_000749:MYBP|XLOC_001140:MYBP|XLOC_001141:ABF|XLOC_001200:ABF|XLOC_001206:TGA|XLOC_001292:OVM, ANT|XLOC_001765:MYBP|XLOC_001782:MYBP|XLOC_001793:ERF1|XLOC_002043:MYBP|XLOC_002319:CUTL|XLOC_002331:K09264|XLOC_002384:MYBP|XLOC_004325:MYBP|XLOC_004498:EREBP|XLOC_004631:MYC2|XLOC_004699:K09264|XLOC_004822:ABF|XLOC_004827:MYBP|…	|XLOC_013270:MYBP|XLOC_021544:EP300, CREBBP, KAT3|	|XLOC_000731:MYBP|XLOC_004325:MYBP|XLOC_006711:MYBP|XLOC_007464:MYBP|XLOC_008186:MYBP|XLOC_011512:MYBP|XLOC_011513:MYBP|XLOC_015696:MYBP|XLOC_016282:MYBP|XLOC_018140:ERF1|XLOC_021961:MYBP|XLOC_022472:MYBP|XLOC_025081:MYBP|XLOC_025729:MYBP|XLOC_025730:MYBP|XLOC_028511:MYBP|XLOC_028765:WRKY33|
Genetic Information Processing; Translation; Ribosome Biogenesis [BR:ko03009];	14	13	1	|XLOC_000616:MDN1, REA1|XLOC_000817:SNU13, NHP2L|XLOC_001308:UTP6|XLOC_001608:RIX7, NVL|XLOC_001873:RRP7|XLOC_002217:EIF4A3, FAL1|XLOC_002782:UTP6|XLOC_003039:UTP6|XLOC_003330:UTP6|XLOC_003400:PWP2, UTP1|XLOC_004364:RIOK1|XLOC_004756:POP5|XLOC_004970:DNAJA5|XLOC_005058:KRR1|XLOC_005234:NOG1|XLOC_006278:UTP21, WDR36|XLOC_006293:RIX7, NVL|XLOC_006316:DHX15, PRP43|XLOC_006423:NOP58|XLOC_006509:CSNK2…	|XLOC_001308:UTP6|XLOC_013260:DKC1, NOLA4, CBF5|XLOC_016292:UTP10, HEATR1|XLOC_016933:PWP2, UTP1|XLOC_017408:UTP13, TBL3|XLOC_019603:DDX27, DRS1|XLOC_019768:UTP4, CIRH1A|XLOC_021778:MTR4, SKIV2L2|XLOC_022600:HSPA1_8|XLOC_025364:NAN1, UTP17, WDR75|XLOC_026710:BMS1|XLOC_027137:NOP4, RBM28|XLOC_029650:UTP14|	|XLOC_011825:REX1, REXO1, RNH70|
Genetic Information Processing; Replication and Repair; Chromosome [BR:ko03036];	11	11	0	|XLOC_000138:INO80, INOC1|XLOC_000139:INO80, INOC1|XLOC_000170:BUB3|XLOC_000277:H3|XLOC_000337:PRMT5, HSL7|XLOC_000471:TAF7|XLOC_000732:PPP2R2|XLOC_000770:CENPE|XLOC_000980:BRD7_9|XLOC_001011:EED|XLOC_001120:PPP2R1|XLOC_001220:H3|XLOC_001227:CTF8|XLOC_001280:INO80, INOC1|XLOC_001366:H2A|XLOC_001369:INO80, INOC1|XLOC_001494:INO80, INOC1|XLOC_001588:H3|XLOC_001705:USP22_27_51, UBP8|XLOC_002086:CARM…	|XLOC_006266:TOP2|XLOC_006419:SMARCA5, SNF2H, ISWI|XLOC_007942:YCS4, CNAP1, CAPD2|XLOC_008211:DICER1, DCR1|XLOC_008553:SUPT6H, SPT6|XLOC_011438:PDS5|XLOC_016807:ELF2C|XLOC_021544:EP300, CREBBP, KAT3|XLOC_026589:APC1|XLOC_027955:ELP3, KAT9|XLOC_026660:PRMT3|
Genetic Information Processing; Translation; Ribosome biogenesis in eukaryotes [PATH:ko03008];	11	10	1	|XLOC_000616:MDN1, REA1|XLOC_000817:SNU13, NHP2L|XLOC_001308:UTP6|XLOC_001608:RIX7, NVL|XLOC_001873:RRP7|XLOC_002782:UTP6|XLOC_003039:UTP6|XLOC_003330:UTP6|XLOC_003400:PWP2, UTP1|XLOC_004364:RIOK1|XLOC_004756:POP5|XLOC_005234:NOG1|XLOC_006278:UTP21, WDR36|XLOC_006293:RIX7, NVL|XLOC_006423:NOP58|XLOC_006509:CSNK2B|XLOC_006585:IMP4|XLOC_006792:NOB1|XLOC_007262:XRN2, RAT1|XLOC_006580:RIOK2|XLOC_0076…	|XLOC_001308:UTP6|XLOC_013260:DKC1, NOLA4, CBF5|XLOC_016292:UTP10, HEATR1|XLOC_016933:PWP2, UTP1|XLOC_017408:UTP13, TBL3|XLOC_019768:UTP4, CIRH1A|XLOC_025364:NAN1, UTP17, WDR75|XLOC_026710:BMS1|XLOC_027137:NOP4, RBM28|XLOC_029650:UTP14|	|XLOC_011825:REX1, REXO1, RNH70|
Genetic Information Processing; Folding, Sorting and Degradation; Ubiquitin system [BR:ko04121];	9	7	2	|XLOC_000024:UBE1, UBA1|XLOC_000164:USP7, UBP15|XLOC_000317:CUL1, CDC53|XLOC_000547:UBE2M, UBC12|XLOC_000983:UBC|XLOC_001007:GABARAP, ATG8, LC3|XLOC_001244:USP7, UBP15|XLOC_001298:USP7, UBP15|XLOC_001559:SUMO, SMT3|XLOC_001683:HUWE1, MULE, ARF-BP1|XLOC_001684:HUWE1, MULE, ARF-BP1|XLOC_001705:USP22_27_51, UBP8|XLOC_001853:USP36_42|XLOC_002014:UBE2D_E, UBC4, UBC5|XLOC_002094:NEDD4, RSP5|XLOC_002132…	|XLOC_001684:HUWE1, MULE, ARF-BP1|XLOC_012068:SART1, HAF, SNU66|XLOC_014788:UBR4, ZUBR1|XLOC_014852:CUL3|XLOC_024738:USP36_42|XLOC_025321:HUWE1, MULE, ARF-BP1|XLOC_026589:APC1|	|XLOC_023137:USP7, UBP15|XLOC_021712:TRIP12|
Genetic Information Processing; Transcription; Spliceosome [BR:ko03041];	8	8	0	|XLOC_000033:CDC2L|XLOC_000069:RBM22, SLT11|XLOC_000092:THOC2|XLOC_000170:BUB3|XLOC_000257:THOC2|XLOC_000265:DHX8, PRP22|XLOC_000280:SF3B4, SAP49|XLOC_000324:PRPF40, PRP40|XLOC_000337:PRMT5, HSL7|XLOC_000423:LSM5|XLOC_000488:SNRNP25|XLOC_000804:SF3B5, SF3B10|XLOC_000817:SNU13, NHP2L|XLOC_001081:PRPF6, PRP6|XLOC_001142:SNRPF, SMF|XLOC_001371:THOC2|XLOC_001383:PPP1C|XLOC_001467:THOC2|XLOC_001629:BU…	|XLOC_000250:PRPF40, PRP40|XLOC_012068:SART1, HAF, SNU66|XLOC_019603:DDX27, DRS1|XLOC_020789:SF3B3, SAP130, RSE1|XLOC_021778:MTR4, SKIV2L2|XLOC_022600:HSPA1_8|XLOC_023448:SNRNP200, BRR2|XLOC_025504:PRPF8, PRP8|
Genetic Information Processing; Replication and Repair; DNA replication proteins [BR:ko03032];	6	6	0	|XLOC_000045:RNASEH2A|XLOC_000071:POLA2|XLOC_000091:RNASEH2A|XLOC_000437:K11138, RIF1|XLOC_000496:PARP|XLOC_001142:SNRPF, SMF|XLOC_001160:RFA2, RPA2|XLOC_001274:RNASEH2A|XLOC_001849:CDC45|XLOC_001907:gyrB|XLOC_002000:PRI1|XLOC_002190:DPO1, polA|XLOC_002228:MCM2|XLOC_002391:RFA2, RPA2|XLOC_002950:CDC45|XLOC_003333:RNASEH2A|XLOC_000308:POLA2|XLOC_000493:MCM7, CDC47|XLOC_001447:GINS4, SLD5|XLOC_0045…	|XLOC_000437:K11138, RIF1|XLOC_002228:MCM2|XLOC_006266:TOP2|XLOC_009793:POLE1|XLOC_013260:DKC1, NOLA4, CBF5|XLOC_024761:MCM5, CDC46|
Genetic Information Processing; Transcription; Spliceosome [PATH:ko03040];	6	6	0	|XLOC_000069:RBM22, SLT11|XLOC_000092:THOC2|XLOC_000257:THOC2|XLOC_000265:DHX8, PRP22|XLOC_000280:SF3B4, SAP49|XLOC_000324:PRPF40, PRP40|XLOC_000423:LSM5|XLOC_000804:SF3B5, SF3B10|XLOC_000817:SNU13, NHP2L|XLOC_001081:PRPF6, PRP6|XLOC_001142:SNRPF, SMF|XLOC_001371:THOC2|XLOC_001467:THOC2|XLOC_001629:BUD31, G10|XLOC_002179:U2AF2|XLOC_002217:EIF4A3, FAL1|XLOC_002238:U2AF1|XLOC_003043:RBM22, SLT11|XL…	|XLOC_000250:PRPF40, PRP40|XLOC_012068:SART1, HAF, SNU66|XLOC_020789:SF3B3, SAP130, RSE1|XLOC_022600:HSPA1_8|XLOC_023448:SNRNP200, BRR2|XLOC_025504:PRPF8, PRP8|
Genetic Information Processing; Folding, Sorting and Degradation; Chaperones and folding catalysts [BR:ko03110];	5	3	2	|XLOC_000031:SEC63|XLOC_000258:DNAJC3|XLOC_000737:trxA|XLOC_000761:PFDN2|XLOC_001550:pfdB, PFDN6|XLOC_001674:HSPBP1|XLOC_001759:AFG3|XLOC_001878:CCT7|XLOC_001904:ftsH, hflB|XLOC_001971:DNAJB11|XLOC_002103:CCT8|XLOC_002760:SEC63|XLOC_004970:DNAJA5|XLOC_005000:dnaJ|XLOC_005212:HEXA_B|XLOC_005300:CCT1, TCP1|XLOC_005322:hscB, HSCB, HSC20|XLOC_005590:HSPA5, BIP|XLOC_005727:ST13|XLOC_005730:STIP1|XLOC_…	|XLOC_007400:htpG, HSP90A|XLOC_018113:groEL, HSPD1|XLOC_022600:HSPA1_8|	|XLOC_001674:HSPBP1|XLOC_012730:CTSA|
Genetic Information Processing; Translation; RNA transport [PATH:ko03013];	5	5	0	|XLOC_000020:XPO5|XLOC_000092:THOC2|XLOC_000111:EIF4E|XLOC_000257:THOC2|XLOC_000337:PRMT5, HSL7|XLOC_000653:EIF2B4|XLOC_000835:TPR|XLOC_000859:NUP43|XLOC_000984:EIF1, SUI1|XLOC_001016:SAP18|XLOC_001371:THOC2|XLOC_001467:THOC2|XLOC_001559:SUMO, SMT3|XLOC_002217:EIF4A3, FAL1|XLOC_002716:XPO5|XLOC_002768:EIF2B1|XLOC_003078:XPO5|XLOC_003302:XPO5|XLOC_003331:XPO5|XLOC_003544:NCBP2, CBP20|XLOC_001446:T…	|XLOC_009347:NUP188|XLOC_013021:NUP210, GP210|XLOC_023945:EIF5B|XLOC_028582:NUP205|XLOC_029623:EIF3A|
Genetic Information Processing; Folding, Sorting and Degradation; Proteasome [BR:ko03051];	4	3	1	|XLOC_000446:PSMD12, RPN5|XLOC_000545:PSMD1, RPN2|XLOC_000652:POMP, UMP1|XLOC_000819:PSMF1|XLOC_001071:PSMA4|XLOC_001421:PSMB6|XLOC_001450:PSMB6|XLOC_002409:PSMC2, RPT1|XLOC_002916:PSMB6|XLOC_002147:PSMC1, RPT2|XLOC_005599:PSMD8, RPN12|XLOC_006061:htpG, HSP90A|XLOC_006792:NOB1|XLOC_005942:htpG, HSP90A|XLOC_007399:DDI1|XLOC_007400:htpG, HSP90A|XLOC_007431:PSMA2|XLOC_007439:PSMD2, RPN1|XLOC_007562:…	|XLOC_007400:htpG, HSP90A|XLOC_022600:HSPA1_8|XLOC_025994:PSME4|	|XLOC_007562:PSMC1, RPT2|
Genetic Information Processing; Folding, Sorting and Degradation; RNA degradation [PATH:ko03018];	4	4	0	|XLOC_000336:RCD1, CNOT9, CAF40|XLOC_000423:LSM5|XLOC_001050:CNOT3, NOT3|XLOC_001214:PATL1, PAT1|XLOC_001612:RCD1, CNOT9, CAF40|XLOC_001632:recQ|XLOC_001778:CAF16|XLOC_002152:PATL1, PAT1|XLOC_004797:DHX36, RHAU|XLOC_005302:CNOT1, NOT1|XLOC_005332:DHX36, RHAU|XLOC_006774:RRP42, EXOSC7|XLOC_007262:XRN2, RAT1|XLOC_005193:DHX36, RHAU|XLOC_007385:RCD1, CNOT9, CAF40|XLOC_007488:RCD1, CNOT9, CAF40|XLOC_…	|XLOC_013280:RRP6, EXOSC10|XLOC_018113:groEL, HSPD1|XLOC_021778:MTR4, SKIV2L2|XLOC_024159:SKI2, SKIV2L|
Genetic Information Processing; Folding, Sorting and Degradation; Ubiquitin mediated proteolysis [PATH:ko04120];	5	4	1	|XLOC_000024:UBE1, UBA1|XLOC_000317:CUL1, CDC53|XLOC_000547:UBE2M, UBC12|XLOC_001683:HUWE1, MULE, ARF-BP1|XLOC_001684:HUWE1, MULE, ARF-BP1|XLOC_002014:UBE2D_E, UBC4, UBC5|XLOC_002094:NEDD4, RSP5|XLOC_002132:APC6, CDC16|XLOC_002890:UBE1, UBA1|XLOC_001573:DDB1|XLOC_003168:SIAH1|XLOC_004363:UBE2H, UBC8|XLOC_004804:SIAH1|XLOC_004923:DET1|XLOC_005181:APC7|XLOC_005184:RCHY1, PIRH2|XLOC_005416:APC13|XLO…	|XLOC_001684:HUWE1, MULE, ARF-BP1|XLOC_014852:CUL3|XLOC_025321:HUWE1, MULE, ARF-BP1|XLOC_026589:APC1|	|XLOC_021712:TRIP12|
Genetic Information Processing; Replication and Repair; DNA repair and recombination proteins [BR:ko03400];	4	4	0	|XLOC_000015:RAD51L3, RAD51D|XLOC_000107:LIG4, DNL4|XLOC_000245:RPB9, POLR2I|XLOC_000320:MLH1|XLOC_000450:POLH|XLOC_000495:MSH6|XLOC_000496:PARP|XLOC_000611:RPB3, POLR2C|XLOC_000706:PMS2|XLOC_001160:RFA2, RPA2|XLOC_001331:RAD51L3, RAD51D|XLOC_001484:LIG4, DNL4|XLOC_001632:recQ|XLOC_001666:RRM1|XLOC_001816:HRAD1, RAD17|XLOC_001828:ERCC6, CSB, RAD26|XLOC_001907:gyrB|XLOC_002127:OGG1|XLOC_002190:DPO…	|XLOC_000495:MSH6|XLOC_001828:ERCC6, CSB, RAD26|XLOC_009793:POLE1|XLOC_027900:POL5, MYBBP1A|
Genetic Information Processing; Folding, Sorting and Degradation; Protein processing in endoplasmic reticulum [PATH:ko04141];	3	2	1	|XLOC_000031:SEC63|XLOC_000258:DNAJC3|XLOC_000317:CUL1, CDC53|XLOC_000716:BCAP31, BAP31|XLOC_001001:OTU1, YOD1|XLOC_001180:MAN1|XLOC_001648:SSR1|XLOC_001674:HSPBP1|XLOC_001971:DNAJB11|XLOC_001972:SAR1|XLOC_002014:UBE2D_E, UBC4, UBC5|XLOC_002225:SIL1, SLS1|XLOC_002760:SEC63|XLOC_004637:OST2, DAD1|XLOC_004938:SAR1|XLOC_005590:HSPA5, BIP|XLOC_005838:PDIA1, P4HB|XLOC_006040:SEC62|XLOC_006061:htpG, HS…	|XLOC_007400:htpG, HSP90A|XLOC_022600:HSPA1_8|	|XLOC_001674:HSPBP1|
Genetic Information Processing; Replication and Repair; DNA replication [PATH:ko03030];	3	3	0	|XLOC_000045:RNASEH2A|XLOC_000071:POLA2|XLOC_000091:RNASEH2A|XLOC_001160:RFA2, RPA2|XLOC_001274:RNASEH2A|XLOC_002000:PRI1|XLOC_002190:DPO1, polA|XLOC_002228:MCM2|XLOC_002391:RFA2, RPA2|XLOC_003333:RNASEH2A|XLOC_000308:POLA2|XLOC_000493:MCM7, CDC47|XLOC_004682:POLD2|XLOC_005240:DNA2|XLOC_005883:RFA1, RPA1, rpa|XLOC_005677:RFC2_4|XLOC_008069:POLD3|XLOC_008138:ssb|XLOC_008540:POLD1|XLOC_009427:RFA1,…	|XLOC_002228:MCM2|XLOC_009793:POLE1|XLOC_024761:MCM5, CDC46|
Genetic Information Processing; Transcription; RNA polymerase [PATH:ko03020];	3	3	0	|XLOC_000245:RPB9, POLR2I|XLOC_000611:RPB3, POLR2C|XLOC_000857:RPC1, POLR3A|XLOC_000863:RPC25, POLR3H|XLOC_001235:RPC82, POLR3C|XLOC_000314:RPB9, POLR2I|XLOC_004998:RPA2, POLR1B|XLOC_005772:RPC37, POLR3E|XLOC_006560:RPC40, POLR1C|XLOC_006569:RPB5, POLR2E|XLOC_007377:RPB12, POLR2K|XLOC_008588:RPA1, POLR1A|XLOC_008657:RPC2, POLR3B|XLOC_008658:RPC2, POLR3B|XLOC_008697:RPC2, POLR3B|XLOC_009048:RPC2, …	|XLOC_000857:RPC1, POLR3A|XLOC_004998:RPA2, POLR1B|XLOC_008588:RPA1, POLR1A|
Genetic Information Processing; Translation; Translation factors [BR:ko03012];	3	3	0	|XLOC_000111:EIF4E|XLOC_000653:EIF2B4|XLOC_000984:EIF1, SUI1|XLOC_001113:ERF3, GSPT|XLOC_002217:EIF4A3, FAL1|XLOC_002768:EIF2B1|XLOC_004451:fusA, GFM, EFG|XLOC_004453:fusA, GFM, EFG|XLOC_004988:EIF2S3|XLOC_005095:EEF1B|XLOC_005621:infB, MTIF2|XLOC_005921:EIF3G|XLOC_006118:EIF5A|XLOC_006486:EIF3B|XLOC_006506:EIF4G|XLOC_006519:fusA, GFM, EFG|XLOC_007474:EIF3D|XLOC_007643:efp|XLOC_007770:EEF1B|XLOC_…	|XLOC_004451:fusA, GFM, EFG|XLOC_023945:EIF5B|XLOC_029623:EIF3A|
Genetic Information Processing; Folding, Sorting and Degradation; Proteasome [PATH:ko03050];	2	1	1	|XLOC_000446:PSMD12, RPN5|XLOC_000545:PSMD1, RPN2|XLOC_000652:POMP, UMP1|XLOC_000819:PSMF1|XLOC_001071:PSMA4|XLOC_001421:PSMB6|XLOC_001450:PSMB6|XLOC_002409:PSMC2, RPT1|XLOC_002916:PSMB6|XLOC_002147:PSMC1, RPT2|XLOC_005599:PSMD8, RPN12|XLOC_007431:PSMA2|XLOC_007439:PSMD2, RPN1|XLOC_007562:PSMC1, RPT2|XLOC_008014:PSMA3|XLOC_008548:PSMA3|XLOC_009114:PSMB4|XLOC_009315:PSMB7|XLOC_009423:PSMA7|XLOC_00…	|XLOC_025994:PSME4|	|XLOC_007562:PSMC1, RPT2|
Genetic Information Processing; Replication and Repair; Nucleotide excision repair [PATH:ko03420];	2	2	0	|XLOC_001160:RFA2, RPA2|XLOC_001828:ERCC6, CSB, RAD26|XLOC_002190:DPO1, polA|XLOC_002391:RFA2, RPA2|XLOC_001573:DDB1|XLOC_004422:TTDA, GTF2H5, TFB5|XLOC_004682:POLD2|XLOC_005640:ERCC3, XPB|XLOC_005642:CDK7|XLOC_005806:ERCC4, XPF|XLOC_005883:RFA1, RPA1, rpa|XLOC_006265:TFIIH2, GTF2H2, SSL1|XLOC_005677:RFC2_4|XLOC_008069:POLD3|XLOC_008540:POLD1|XLOC_008091:TFIIH1, GTF2H1, TFB1|XLOC_009068:MNAT1|XLO…	|XLOC_001828:ERCC6, CSB, RAD26|XLOC_009793:POLE1|
Genetic Information Processing; Translation; mRNA surveillance pathway [PATH:ko03015];	2	2	0	|XLOC_000732:PPP2R2|XLOC_000928:RNGTT|XLOC_001016:SAP18|XLOC_001113:ERF3, GSPT|XLOC_001120:PPP2R1|XLOC_002155:MSI|XLOC_002217:EIF4A3, FAL1|XLOC_003544:NCBP2, CBP20|XLOC_001446:THOC4, ALY|XLOC_004535:UPF1, RENT1|XLOC_005177:PPP2R3|XLOC_005210:PPP2C|XLOC_006026:PPP2C|XLOC_006168:PPP2C|XLOC_006257:PPP2R5|XLOC_006638:PAP|XLOC_006762:UPF1, RENT1|XLOC_006106:CLP1, HERB|XLOC_007409:RNPS1|XLOC_007412:NCB…	|XLOC_010723:FIP1L1, FIP1|XLOC_027101:SMG1|
Genetic Information Processing; Replication and Repair; Base excision repair [PATH:ko03410];	1	1	0	|XLOC_000496:PARP|XLOC_002127:OGG1|XLOC_002190:DPO1, polA|XLOC_004647:PARP|XLOC_004682:POLD2|XLOC_005138:mutY|XLOC_007505:tag|XLOC_008069:POLD3|XLOC_008540:POLD1|XLOC_008574:MPG|XLOC_008387:tag|XLOC_009768:LIG1|XLOC_009793:POLE1|XLOC_010226:tag|XLOC_009468:tag|XLOC_011342:POLE1|XLOC_012390:alkA|XLOC_012682:MBD4|XLOC_012688:UNG, UDG|XLOC_012761:alkA|XLOC_013275:tag|XLOC_013403:alkA|XLOC_015619:tag…	|XLOC_009793:POLE1|
Genetic Information Processing; Replication and Repair; Mismatch repair [PATH:ko03430];	1	1	0	|XLOC_000320:MLH1|XLOC_000495:MSH6|XLOC_000706:PMS2|XLOC_001160:RFA2, RPA2|XLOC_002321:MSH2|XLOC_002391:RFA2, RPA2|XLOC_002432:MLH1|XLOC_004682:POLD2|XLOC_005883:RFA1, RPA1, rpa|XLOC_005677:RFC2_4|XLOC_008069:POLD3|XLOC_008138:ssb|XLOC_008540:POLD1|XLOC_009427:RFA1, RPA1, rpa|XLOC_009465:RFA1, RPA1, rpa|XLOC_009768:LIG1|XLOC_010846:RFC2_4|XLOC_013103:RFA1, RPA1, rpa|XLOC_013119:RFA1, RPA1, rpa|XL…	|XLOC_000495:MSH6|
Genetic Information Processing; Translation; Aminoacyl-tRNA biosynthesis [PATH:ko00970];	1	1	0	|XLOC_000602:VARS, valS|XLOC_005158:IARS, ileS|XLOC_005930:TARS, thrS|XLOC_005934:WARS, trpS|XLOC_006545:glyQS|XLOC_007904:NARS, asnS|XLOC_009444:TARS, thrS|XLOC_009696:CARS, cysS|XLOC_010295:QARS, glnS|XLOC_010316:FARSA, pheS|XLOC_011407:IARS, ileS|XLOC_011623:WARS, trpS|XLOC_011889:AARS, alaS|XLOC_012821:LARS, leuS|XLOC_012943:LARS, leuS|XLOC_014340:NARS, asnS|XLOC_014435:LARS, leuS|XLOC_014813…	|XLOC_012821:LARS, leuS|
>3. Environmental Information Processing
Environmental Information Processing; Signal Transduction; Plant hormone signal transduction [PATH:ko04075];	16	9	7	|XLOC_000072:TIR1|XLOC_000076:K14486, ARF|XLOC_000200:BIN2|XLOC_000288:ABF|XLOC_000363:SAUR|XLOC_000373:TGA|XLOC_000391:TIR1|XLOC_000717:ETR, ERS|XLOC_000793:PP2C|XLOC_000795:PYL|XLOC_001141:ABF|XLOC_001200:ABF|XLOC_001206:TGA|XLOC_001601:EBF1_2|XLOC_001793:ERF1|XLOC_002107:PP2C|XLOC_002294:ETR, ERS|XLOC_003098:TIR1|XLOC_004090:SAUR|XLOC_000315:SAUR|XLOC_000540:SNRK2|XLOC_001468:ARR-B|XLOC_004631…	|XLOC_000076:K14486, ARF|XLOC_000793:PP2C|XLOC_015473:JAZ|XLOC_018922:BKI1|XLOC_020880:DELLA|XLOC_023317:GID1|XLOC_024036:ETR, ERS|XLOC_025440:ARR-B|XLOC_027547:SAUR|	|XLOC_011738:JAZ|XLOC_018140:ERF1|XLOC_024869:JAZ|XLOC_027165:SAUR|XLOC_027628:AHP|XLOC_028425:SAUR|XLOC_029174:JAZ|
Environmental Information Processing; Signal Transduction; Phosphatidylinositol signaling system [PATH:ko04070];	2	2	0	|XLOC_000261:PI4K|XLOC_000262:PI4K|XLOC_000292:PIKFYVE, FAB1|XLOC_001307:PI4K|XLOC_001387:E2.7.8.11|XLOC_001445:PIKFYVE, FAB1|XLOC_001855:E2.7.1.68, PIP5K|XLOC_002878:PI4K|XLOC_003073:PI4K|XLOC_001348:PI4K|XLOC_004624:ITPK1|XLOC_005492:ITPK1|XLOC_008356:PLCD|XLOC_008374:E2.7.1.68, PIP5K|XLOC_008114:E2.7.1.68, PIP5K|XLOC_010794:PI4K|XLOC_011180:PI4K|XLOC_011712:ITPK1|XLOC_012203:E2.7.1.107, DGK, d…	|XLOC_000261:PI4K|XLOC_024933:PIKFYVE, FAB1|
>4. Cellular Processes
Cellular Processes; Cell Growth and Death; Cell cycle [PATH:ko04110];	4	4	0	|XLOC_000170:BUB3|XLOC_000317:CUL1, CDC53|XLOC_000823:YWHA|XLOC_001849:CDC45|XLOC_002044:YWHA|XLOC_002132:APC6, CDC16|XLOC_002228:MCM2|XLOC_002950:CDC45|XLOC_000493:MCM7, CDC47|XLOC_000740:SMC1|XLOC_004513:CDC7|XLOC_005181:APC7|XLOC_005416:APC13|XLOC_005642:CDK7|XLOC_005691:CDH1|XLOC_005943:CCNB|XLOC_006245:SCC1, MCD1, RAD21|XLOC_006427:CUL1, CDC53|XLOC_006740:CDC20|XLOC_005485:CDC20|XLOC_006096:…	|XLOC_002228:MCM2|XLOC_021544:EP300, CREBBP, KAT3|XLOC_024761:MCM5, CDC46|XLOC_026589:APC1|
Cellular Processes; Transport and Catabolism; Endocytosis [PATH:ko04144];	2	1	1	|XLOC_000116:PDCD6IP, ALIX, RIM20|XLOC_000353:AP2A|XLOC_000973:RAB7A|XLOC_001035:PDCD6IP, ALIX, RIM20|XLOC_001375:PDCD6IP, ALIX, RIM20|XLOC_001814:ARFGAP2_3|XLOC_001855:E2.7.1.68, PIP5K|XLOC_001942:CHMP1, VPS46, DID2|XLOC_002094:NEDD4, RSP5|XLOC_002412:CLTC|XLOC_003293:PDCD6IP, ALIX, RIM20|XLOC_000011:PDCD6IP, ALIX, RIM20|XLOC_000361:ACAP|XLOC_004702:E3.1.4.4, PLD|XLOC_004931:STAMBP, AMSH|XLOC_00…	|XLOC_022600:HSPA1_8|	|XLOC_006611:CHMP6, VPS20|
Cellular Processes; Transport and Catabolism; Lysosome [PATH:ko04142];	2	0	2	|XLOC_001036:NPC1|XLOC_001443:AP1M|XLOC_002352:ATPeVAC39, ATP6D|XLOC_002412:CLTC|XLOC_001722:HGSNAT|XLOC_004359:AP1B1|XLOC_004454:LGMN|XLOC_004502:PPT|XLOC_004596:AP4E1|XLOC_005212:HEXA_B|XLOC_006275:NAGLU|XLOC_006284:CTSA|XLOC_006532:PPT|XLOC_007601:ATPeVPL, ATP6L|XLOC_008362:AP1B1|XLOC_009443:AP1G1|XLOC_009760:CTSA|XLOC_009761:CTSA|XLOC_009909:ATPeVI, ATP6N1A|XLOC_010871:ATPeVPL, ATP6L|XLOC_011…		|XLOC_006532:PPT|XLOC_012730:CTSA|
Cellular Processes; Cell Communication; Adherens junction [PATH:ko04520];	1	1	0	|XLOC_004354:ERK1_2|XLOC_006509:CSNK2B|XLOC_008257:CSNK2B|XLOC_008576:ACTB_G1|XLOC_009904:ERK1_2|XLOC_012804:CSNK2A|XLOC_013524:CSNK2A|XLOC_015806:RAC1|XLOC_019645:ERK1_2|XLOC_020150:CSNK2A|XLOC_021439:ACTB_G1|XLOC_021460:ACTB_G1|XLOC_021543:EP300, CREBBP, KAT3|XLOC_021544:EP300, CREBBP, KAT3|XLOC_021772:CSNK2B|XLOC_023202:ERK1_2|XLOC_023872:CSNK2B|XLOC_026608:ERK1_2|XLOC_027256:EP300, CREBBP, KA…	|XLOC_021544:EP300, CREBBP, KAT3|
Cellular Processes; Cell Growth and Death; Oocyte meiosis [PATH:ko04114];	1	1	0	|XLOC_000317:CUL1, CDC53|XLOC_000823:YWHA|XLOC_001120:PPP2R1|XLOC_001383:PPP1C|XLOC_002044:YWHA|XLOC_002132:APC6, CDC16|XLOC_000740:SMC1|XLOC_004354:ERK1_2|XLOC_005181:APC7|XLOC_005210:PPP2C|XLOC_005416:APC13|XLOC_006026:PPP2C|XLOC_006168:PPP2C|XLOC_006257:PPP2R5|XLOC_006427:CUL1, CDC53|XLOC_006740:CDC20|XLOC_004525:PPP3R, CNB|XLOC_005485:CDC20|XLOC_005513:PPP3R, CNB|XLOC_007432:YWHA|XLOC_007699:…	|XLOC_026589:APC1|
Cellular Processes; Cell Motility; Cytoskeleton proteins [BR:ko04812];	1	1	0	|XLOC_000023:ARPC2|XLOC_001062:TUBB|XLOC_001233:TUBB|XLOC_001706:ARPC3|XLOC_002203:KIFC1|XLOC_002297:KIFC2_3|XLOC_000878:KIF2_24, MCAK|XLOC_002085:DYNLL|XLOC_006436:DYNLL|XLOC_006530:ARPC5|XLOC_006649:TUBA|XLOC_007702:KIF11|XLOC_007863:KIF11|XLOC_007897:TUBB|XLOC_008346:TUBB|XLOC_008435:CFL|XLOC_008506:ftsZ|XLOC_008576:ACTB_G1|XLOC_009180:ARPC2|XLOC_009478:ARPC1A_B|XLOC_009918:KIF11|XLOC_010666:T…	|XLOC_019733:KIF4S|
Cellular Processes; Cell Motility; Regulation of actin cytoskeleton [PATH:ko04810];	1	1	0	|XLOC_000023:ARPC2|XLOC_000292:PIKFYVE, FAB1|XLOC_001383:PPP1C|XLOC_001445:PIKFYVE, FAB1|XLOC_001706:ARPC3|XLOC_001855:E2.7.1.68, PIP5K|XLOC_004354:ERK1_2|XLOC_006530:ARPC5|XLOC_008374:E2.7.1.68, PIP5K|XLOC_008435:CFL|XLOC_008576:ACTB_G1|XLOC_008114:E2.7.1.68, PIP5K|XLOC_009180:ARPC2|XLOC_009478:ARPC1A_B|XLOC_009904:ERK1_2|XLOC_010753:ARPC4|XLOC_012922:NCKAP1, NAP125|XLOC_015806:RAC1|XLOC_017059:…	|XLOC_024933:PIKFYVE, FAB1|
Cellular Processes; Transport and Catabolism; Phagosome [PATH:ko04145];	1	1	0	|XLOC_000292:PIKFYVE, FAB1|XLOC_000973:RAB7A|XLOC_001062:TUBB|XLOC_001177:ATPeVA, ATP6A1|XLOC_001233:TUBB|XLOC_001395:ATPeVE, ATP6E|XLOC_001445:PIKFYVE, FAB1|XLOC_002352:ATPeVAC39, ATP6D|XLOC_005204:ATPeVD, ATP6M|XLOC_005622:ATPeVE, ATP6E|XLOC_006649:TUBA|XLOC_007601:ATPeVPL, ATP6L|XLOC_007897:TUBB|XLOC_008068:SEC61A|XLOC_008346:TUBB|XLOC_008576:ACTB_G1|XLOC_008251:ATPeVB, ATP6B1|XLOC_009909:ATPe…	|XLOC_024933:PIKFYVE, FAB1
>5. Organismal Systems
Organismal Systems; Environmental Adaptation; Plant-pathogen interaction [PATH:ko04626];	12	3	9	|XLOC_000430:CML|XLOC_000541::CPK|XLOC_000703:MIN7|XLOC_001002:CPK|XLOC_001109:CML|XLOC_001322:CPK|XLOC_001847:FLS2|XLOC_001930:CML|XLOC_002363:CPK|XLOC_003261:CML|XLOC_003320:CML|XLOC_001932:CML|XLOC_004340:RBOH|XLOC_004631:MYC2|XLOC_005323:CPK|XLOC_005495:MYC2|XLOC_005624:WRKY29|XLOC_006061:htpG, HSP90A|XLOC_006602:JAZ|XLOC_006736:RPM1, RPS3|XLOC_004761:CPK|XLOC_005915:CPK|XLOC_005942:htpG, HSP…	|XLOC_007400:htpG, HSP90A|XLOC_022913:CPK|XLOC_015473:JAZ|	|XLOC_001932:CML|XLOC_011738:JAZ|XLOC_016803:CML|XLOC_020140:CPK|XLOC_023074:CML|XLOC_024363:CML|XLOC_024869:JAZ|XLOC_028765:WRKY33|XLOC_029174:JAZ|
Organismal Systems; Immune System; Antigen processing and presentation [PATH:ko04612];	2	2	0	|XLOC_004454:LGMN|XLOC_006061:htpG, HSP90A|XLOC_006365:NFYC|XLOC_005942:htpG, HSP90A|XLOC_007400:htpG, HSP90A|XLOC_007705:HSPA1_8|XLOC_009301:HSPA1_8|XLOC_009632:htpG, HSP90A|XLOC_010996:HSPA4|XLOC_011620:LGMN|XLOC_011810:HSPA4|XLOC_013093:CTSL|XLOC_014718:CTSL|XLOC_013089:CTSL|XLOC_015899:CTSL|XLOC_016158:htpG, HSP90A|XLOC_016999:HSPA1_8|XLOC_017001:HSPA1_8|XLOC_017024:CANX|XLOC_017729:htpG, HSP…	|XLOC_007400:htpG, HSP90A|XLOC_022600:HSPA1_8|
Organismal Systems; Environmental Adaptation; Circadian rhythm - plant [PATH:ko04712];	1	1	0	|XLOC_003128:CRY2|XLOC_006509:CSNK2B|XLOC_008257:CSNK2B|XLOC_011576:E2.3.1.74, bcsA|XLOC_011854:APRR7|XLOC_012804:CSNK2A|XLOC_013524:CSNK2A|XLOC_017973:CRY2|XLOC_019876:CRY1|XLOC_020150:CSNK2A|XLOC_021772:CSNK2B|XLOC_021910:E2.3.1.74, bcsA|XLOC_023872:CSNK2B|XLOC_024878:ZTL|	|XLOC_017973:CRY2|
Organismal Systems; Immune System; Cytosolic DNA-sensing pathway [PATH:ko04623];	1	1	0	|XLOC_000857:RPC1, POLR3A|XLOC_000863:RPC25, POLR3H|XLOC_001235:RPC82, POLR3C|XLOC_005772:RPC37, POLR3E|XLOC_006560:RPC40, POLR1C|XLOC_006569:RPB5, POLR2E|XLOC_007377:RPB12, POLR2K|XLOC_008657:RPC2, POLR3B|XLOC_008658:RPC2, POLR3B|XLOC_008697:RPC2, POLR3B|XLOC_009048:RPC2, POLR3B|XLOC_009268:RPC1, POLR3A|XLOC_011360:RPB5, POLR2E|XLOC_011403:RPC19, POLR1D|XLOC_012120:RPB5, POLR2E|XLOC_010823:RPC82…	|XLOC_000857:RPC1, POLR3A|
Organismal Systems; Immune System; NOD-like receptor signaling pathway [PATH:ko04621];	1	1	0	|XLOC_004354:ERK1_2|XLOC_006061:htpG, HSP90A|XLOC_005942:htpG, HSP90A|XLOC_007400:htpG, HSP90A|XLOC_009632:htpG, HSP90A|XLOC_009904:ERK1_2|XLOC_016156:SUGT1, SGT1|XLOC_016158:htpG, HSP90A|XLOC_017729:htpG, HSP90A|XLOC_017786:htpG, HSP90A|XLOC_018804:HSP90B, TRA1|XLOC_019645:ERK1_2|XLOC_020172:htpG, HSP90A|XLOC_023187:htpG, HSP90A|XLOC_023190:SUGT1, SGT1|XLOC_023202:ERK1_2|XLOC_025329:htpG, HSP90A…	|XLOC_007400:htpG, HSP90A|

## Sheet: Table S3
Table S3. GO functional enrichment analysis of differentially expressed genes between library A and library CK at E-vaues ≤ 1 × 10−10.
GO	Class	Differentially Expressed Genes
		Total Number	Up-regulated	Down-regulated	Up-regulated	Down-regulated
Cellular Component	cell	116	73	43	XLOC_000016|XLOC_000232|XLOC_000857|XLOC_001659|XLOC_001675|XLOC_001840|XLOC_002076|XLOC_002228|XLOC_003094|XLOC_004429|XLOC_004451|XLOC_004754|XLOC_004755|XLOC_004998|XLOC_005017|XLOC_005041|XLOC_005062|XLOC_005502|XLOC_006419|XLOC_007639|XLOC_007670|XLOC_007942|XLOC_008588|XLOC_009452|XLOC_009599|XLOC_009728|XLOC_010302|XLOC_011277|XLOC_011392|XLOC_012019|XLOC_012821|XLOC_013280|XLOC_014091|XLO…	XLOC_000563|XLOC_001740|XLOC_001741|XLOC_001742|XLOC_003921|XLOC_004633|XLOC_006573|XLOC_007688|XLOC_009433|XLOC_009837|XLOC_009935|XLOC_010136|XLOC_010260|XLOC_011730|XLOC_013062|XLOC_014166|XLOC_014286|XLOC_014576|XLOC_015783|XLOC_017209|XLOC_017286|XLOC_017535|XLOC_019069|XLOC_019376|XLOC_019963|XLOC_020249|XLOC_020906|XLOC_020965|XLOC_021266|XLOC_023048|XLOC_023615|XLOC_023616|XLOC_023888|XLO…
	cell part	116	73	43	XLOC_000016|XLOC_000232|XLOC_000857|XLOC_001659|XLOC_001675|XLOC_001840|XLOC_002076|XLOC_002228|XLOC_003094|XLOC_004429|XLOC_004451|XLOC_004754|XLOC_004755|XLOC_004998|XLOC_005017|XLOC_005041|XLOC_005062|XLOC_005502|XLOC_006419|XLOC_007639|XLOC_007670|XLOC_007942|XLOC_008588|XLOC_009452|XLOC_009599|XLOC_009728|XLOC_010302|XLOC_011277|XLOC_011392|XLOC_012019|XLOC_012821|XLOC_013280|XLOC_014091|XLO…	XLOC_000563|XLOC_001740|XLOC_001741|XLOC_001742|XLOC_003921|XLOC_004633|XLOC_006573|XLOC_007688|XLOC_009433|XLOC_009837|XLOC_009935|XLOC_010136|XLOC_010260|XLOC_011730|XLOC_013062|XLOC_014166|XLOC_014286|XLOC_014576|XLOC_015783|XLOC_017209|XLOC_017286|XLOC_017535|XLOC_019069|XLOC_019376|XLOC_019963|XLOC_020249|XLOC_020906|XLOC_020965|XLOC_021266|XLOC_023048|XLOC_023615|XLOC_023616|XLOC_023888|XLO…
	envelope	3	2	1	XLOC_019610|XLOC_028582|	XLOC_017209|
	extracellular region	5	3	2	XLOC_013406|XLOC_025749|XLOC_029028|	XLOC_005800|XLOC_009433|
	macromolecular complex	25	20	5	XLOC_001659|XLOC_002228|XLOC_004754|XLOC_004755|XLOC_005041|XLOC_009599|XLOC_014091|XLOC_014852|XLOC_015943|XLOC_017408|XLOC_019733|XLOC_024761|XLOC_025181|XLOC_025202|XLOC_025504|XLOC_025990|XLOC_026589|XLOC_028582|XLOC_029623|XLOC_029650|	XLOC_001742|XLOC_009837|XLOC_020906|XLOC_025908|XLOC_027267|
	membrane\-enclosed lumen	2	2	0	XLOC_002228|XLOC_024761|
	organelle	35	28	7	XLOC_000857|XLOC_001659|XLOC_001675|XLOC_002228|XLOC_004998|XLOC_005041|XLOC_006419|XLOC_007942|XLOC_008588|XLOC_014091|XLOC_014469|XLOC_015943|XLOC_018107|XLOC_019610|XLOC_019733|XLOC_020789|XLOC_021544|XLOC_022799|XLOC_024036|XLOC_024707|XLOC_024761|XLOC_025504|XLOC_025990|XLOC_026589|XLOC_026601|XLOC_026710|XLOC_028582|XLOC_029434|	XLOC_007688|XLOC_014576|XLOC_017209|XLOC_017286|XLOC_019069|XLOC_025761|XLOC_025908|
	organelle part	17	14	3	XLOC_001659|XLOC_002228|XLOC_005041|XLOC_014091|XLOC_015943|XLOC_019610|XLOC_019733|XLOC_022799|XLOC_024036|XLOC_024761|XLOC_025504|XLOC_025990|XLOC_026589|XLOC_028582|	XLOC_007688|XLOC_017209|XLOC_025908|
Molecular Function	antioxidant activity	13	6	7	XLOC_001023|XLOC_001150|XLOC_002438|XLOC_012788|XLOC_021200|XLOC_021757|	XLOC_000286|XLOC_001022|XLOC_006035|XLOC_016060|XLOC_017454|XLOC_017455|XLOC_017456|
	binding	383	218	165	XLOC_000016|XLOC_000137|XLOC_000207|XLOC_000232|XLOC_000250|XLOC_000338|XLOC_000341|XLOC_000494|XLOC_000495|XLOC_000556|XLOC_000642|XLOC_000760|XLOC_000857|XLOC_001023|XLOC_001150|XLOC_001351|XLOC_001659|XLOC_001675|XLOC_001684|XLOC_001828|XLOC_001956|XLOC_002099|XLOC_002228|XLOC_002296|XLOC_002438|XLOC_003800|XLOC_003826|XLOC_003827|XLOC_003843|XLOC_003957|XLOC_004451|XLOC_004493|XLOC_004700|XLO…	XLOC_000183|XLOC_000286|XLOC_000342|XLOC_000731|XLOC_000799|XLOC_000822|XLOC_000855|XLOC_001022|XLOC_001043|XLOC_001645|XLOC_001932|XLOC_001991|XLOC_002057|XLOC_002262|XLOC_003373|XLOC_004325|XLOC_004729|XLOC_005286|XLOC_005403|XLOC_005429|XLOC_005572|XLOC_005713|XLOC_005785|XLOC_005837|XLOC_006035|XLOC_006539|XLOC_006540|XLOC_006573|XLOC_006616|XLOC_006711|XLOC_006800|XLOC_007423|XLOC_007448|XLO…
	catalytic activity	287	144	143	XLOC_000016|XLOC_000207|XLOC_000232|XLOC_000341|XLOC_000556|XLOC_000642|XLOC_000793|XLOC_000857|XLOC_001023|XLOC_001150|XLOC_001659|XLOC_001828|XLOC_001956|XLOC_002228|XLOC_002438|XLOC_003094|XLOC_003800|XLOC_004451|XLOC_004622|XLOC_004700|XLOC_004754|XLOC_004755|XLOC_004998|XLOC_005338|XLOC_006266|XLOC_006419|XLOC_006543|XLOC_007047|XLOC_007639|XLOC_007670|XLOC_007772|XLOC_007845|XLOC_007953|XLO…	XLOC_000114|XLOC_000286|XLOC_000342|XLOC_000708|XLOC_000855|XLOC_001022|XLOC_001318|XLOC_001425|XLOC_001572|XLOC_001645|XLOC_001800|XLOC_001991|XLOC_002777|XLOC_002793|XLOC_003041|XLOC_003211|XLOC_003216|XLOC_003373|XLOC_003575|XLOC_004557|XLOC_004559|XLOC_004603|XLOC_004778|XLOC_005174|XLOC_005403|XLOC_005429|XLOC_005467|XLOC_005572|XLOC_005817|XLOC_005837|XLOC_005978|XLOC_006035|XLOC_006076|XLO…
	electron carrier activity	26	3	23	XLOC_008005|XLOC_013440|XLOC_019064|	XLOC_000855|XLOC_005174|XLOC_005837|XLOC_007423|XLOC_009251|XLOC_010921|XLOC_012047|XLOC_012903|XLOC_016443|XLOC_017137|XLOC_017317|XLOC_017574|XLOC_017840|XLOC_017898|XLOC_017899|XLOC_018896|XLOC_019746|XLOC_023173|XLOC_023942|XLOC_025803|XLOC_027103|XLOC_027104|XLOC_028569|
	enzyme regulator activity	11	2	9	XLOC_007670|XLOC_021386|	XLOC_005817|XLOC_005978|XLOC_006778|XLOC_015955|XLOC_017347|XLOC_017349|XLOC_020234|XLOC_021922|XLOC_023632|
	molecular transducer activity	5	3	2	XLOC_014539|XLOC_024036|XLOC_025440|	XLOC_001742|XLOC_027628|
	nutrient reservoir activity	1	1	0	XLOC_002099|
	structural molecule activity	1	1	0	XLOC_015943|
	transcription regulator activity	39	13	26	XLOC_004707|XLOC_005284|XLOC_006000|XLOC_008313|XLOC_009841|XLOC_014302|XLOC_014539|XLOC_019735|XLOC_021142|XLOC_021544|XLOC_021821|XLOC_024036|XLOC_025440|XLOC_025771|	XLOC_000799|XLOC_001043|XLOC_005286|XLOC_005785|XLOC_006539|XLOC_006540|XLOC_006800|XLOC_009514|XLOC_011118|XLOC_011193|XLOC_012772|XLOC_014046|XLOC_014288|XLOC_014576|XLOC_014969|XLOC_016275|XLOC_016970|XLOC_017286|XLOC_017816|XLOC_018140|XLOC_019069|XLOC_019282|XLOC_026528|XLOC_027525|XLOC_028765|
	translation regulator activity	1	1	0	XLOC_004451|
	transporter activity	29	15	14	XLOC_000016|XLOC_003094|XLOC_004429|XLOC_005017|XLOC_005502|XLOC_007639|XLOC_010302|XLOC_011392|XLOC_017525|XLOC_019439|XLOC_019709|XLOC_021339|XLOC_022757|XLOC_025545|XLOC_026396|	XLOC_001740|XLOC_001741|XLOC_003921|XLOC_004633|XLOC_009935|XLOC_010136|XLOC_013062|XLOC_019376|XLOC_020965|XLOC_023888|XLOC_024151|XLOC_027538|XLOC_029226|XLOC_029479|
Biological Process	anatomical structure formation	1	1	0	XLOC_001675|
	biological regulation	66	26	40	XLOC_000261|XLOC_004493|XLOC_004700|XLOC_004707|XLOC_005284|XLOC_006000|XLOC_007367|XLOC_008313|XLOC_008553|XLOC_009841|XLOC_011161|XLOC_012054|XLOC_014302|XLOC_014539|XLOC_018107|XLOC_018798|XLOC_019735|XLOC_021142|XLOC_021459|XLOC_021544|XLOC_021821|XLOC_023979|XLOC_024036|XLOC_025440|XLOC_025771|XLOC_026601|XLOC_027186|	XLOC_000799|XLOC_001043|XLOC_001742|XLOC_005174|XLOC_005286|XLOC_005785|XLOC_006539|XLOC_006540|XLOC_006616|XLOC_006800|XLOC_009514|XLOC_009545|XLOC_009823|XLOC_010736|XLOC_011118|XLOC_011193|XLOC_012772|XLOC_014046|XLOC_014288|XLOC_014576|XLOC_014837|XLOC_014969|XLOC_016275|XLOC_016970|XLOC_017286|XLOC_017816|XLOC_017898|XLOC_017899|XLOC_018140|XLOC_019069|XLOC_019282|XLOC_023866|XLOC_023942|XLO…
	cellular component biogenesis	5	5	0	XLOC_001675|XLOC_002292|XLOC_017408|XLOC_026710|XLOC_029650|
	cellular component organization	9	9	0	XLOC_001675|XLOC_005519|XLOC_006419|XLOC_007670|XLOC_007942|XLOC_011277|XLOC_012019|XLOC_022799|XLOC_029434|
	cellular process	213	134	79	XLOC_000207|XLOC_000232|XLOC_000261|XLOC_000495|XLOC_000556|XLOC_000642|XLOC_000793|XLOC_000857|XLOC_001675|XLOC_001840|XLOC_002199|XLOC_002228|XLOC_002292|XLOC_003800|XLOC_003957|XLOC_004429|XLOC_004451|XLOC_004493|XLOC_004622|XLOC_004707|XLOC_004754|XLOC_004755|XLOC_004998|XLOC_005017|XLOC_005041|XLOC_005062|XLOC_005218|XLOC_005284|XLOC_005338|XLOC_005519|XLOC_006000|XLOC_006266|XLOC_006419|XLO…	XLOC_000799|XLOC_001043|XLOC_001572|XLOC_001645|XLOC_001742|XLOC_001991|XLOC_003216|XLOC_005174|XLOC_005286|XLOC_005403|XLOC_005785|XLOC_006532|XLOC_006539|XLOC_006540|XLOC_006573|XLOC_006616|XLOC_006800|XLOC_007498|XLOC_007687|XLOC_009084|XLOC_009433|XLOC_009514|XLOC_009531|XLOC_009545|XLOC_009823|XLOC_009837|XLOC_010736|XLOC_010928|XLOC_011118|XLOC_011193|XLOC_011587|XLOC_011781|XLOC_012354|XLO…
	death	1	1	0	XLOC_020858|
	developmental process	1	1	0	XLOC_011161|
	establishment of localization	44	23	21	XLOC_000016|XLOC_000338|XLOC_003094|XLOC_004429|XLOC_005017|XLOC_005062|XLOC_005502|XLOC_005519|XLOC_005583|XLOC_007639|XLOC_009728|XLOC_010302|XLOC_011392|XLOC_017525|XLOC_019439|XLOC_019709|XLOC_021339|XLOC_022636|XLOC_022757|XLOC_025545|XLOC_026396|XLOC_027555|XLOC_029617|	XLOC_000822|XLOC_001740|XLOC_001741|XLOC_003921|XLOC_004633|XLOC_006573|XLOC_006611|XLOC_009197|XLOC_009935|XLOC_010136|XLOC_013062|XLOC_016193|XLOC_017209|XLOC_019376|XLOC_020965|XLOC_023888|XLOC_024151|XLOC_025046|XLOC_027538|XLOC_029226|XLOC_029479|
	immune system process	1	1	0	XLOC_023979|
	localization	44	23	21	XLOC_000016|XLOC_000338|XLOC_003094|XLOC_004429|XLOC_005017|XLOC_005062|XLOC_005502|XLOC_005519|XLOC_005583|XLOC_007639|XLOC_009728|XLOC_010302|XLOC_011392|XLOC_017525|XLOC_019439|XLOC_019709|XLOC_021339|XLOC_022636|XLOC_022757|XLOC_025545|XLOC_026396|XLOC_027555|XLOC_029617|	XLOC_000822|XLOC_001740|XLOC_001741|XLOC_003921|XLOC_004633|XLOC_006573|XLOC_006611|XLOC_009197|XLOC_009935|XLOC_010136|XLOC_013062|XLOC_016193|XLOC_017209|XLOC_019376|XLOC_020965|XLOC_023888|XLOC_024151|XLOC_025046|XLOC_027538|XLOC_029226|XLOC_029479|
[truncated: 6 more rows]

## Sheet: Table S4
Table S4. Pathway assignment of defense-related genes in PI 201234 following challenge with P. capsici.
Pathway	Differentially expressed genes				Functions
	Gene name	Reference gene	Expression pattern	Annotation
PAMP(Pathogen Associated Molecular Pattern)	XLOC_016613	Capana03g003983	Up	Leucine-rich repeat receptor protein kinase	Perception of PAMPs and induce defense responses
	XLOC_001946	Capana00g003181	Up	Brassinosteroid insensitive 1-associated receptor kinase 1(BAK1)
	XLOC_014053	Capana02g000943	Up
ETI(Effector-triggered immunity)	XLOC_003827	-	Up	Serine-threonine protein kinase	Recognition of the altered status and initiates a defense-signaling response: hypersensitive response (HR)
[truncated: 233 more rows]

## Sheet: Table S5
Table S5. Primer sequences used by quantitative real-time PCR.
[truncated: 27 more rows]
